# Supplementary material for: Preparation of solid dispersion systems for enhanced dissolution of poorly water soluble diacerein: In-vitro evaluation, optimization and physiologically based pharmacokinetic modeling
Source: PLoS One. 2021 Jan 20;16(1):e0245482. doi: 10.1371/journal.pone.0245482 (PMC7816977; doi:10.1371/journal.pone.0245482)
Supplement: S2 File — (XLSX) [file pone.0245482.s002.xlsx]

## Sheet: calibration curve
Calibration Curve
Conc.	abs.	K (C/A)
2	0.179	11.1732
4	0.3621	11.0467
6	0.555	10.8108
8	0.7487	10.6852
10	0.951	10.5152
Mean		10.8462

## Sheet: Drug Content
Run	Ratio (D:P)	Polymer	Mean Absorbance	Mean Conc. (µg/ml)	Mean Drug Content (mg)	Mean Drug Content (%)
1	01:01:00	PVP 25	0.4297	4.6992	46.992	93.984
2	01:01:00		0.4367	4.77575	47.7575	95.515
3	01:02:00		0.42975	4.69975	46.9975	93.9949
4	01:02:00		0.41039	4.48803	44.8803	89.7605
5	01:04:00		0.43894	4.80025	48.0025	96.005
6	01:01:00	PVP 90	0.4234	4.6303	46.303	92.606
7	01:01:00		0.40896	4.47239	44.7239	89.4477
8	01:02:00		0.43984	4.81009	48.1009	96.2018
9	01:02:00		0.42789	4.67941	46.7941	93.5881
10	01:04:00		0.44128	4.82584	48.2584	96.5168
11	01:01:00	PEG 4000	0.42578	4.65633	46.5633	93.1266
12	01:02:00		0.44217	4.83557	48.3557	96.7114
13	01:02:00		0.46032	5.03406	50.3406	100.681
14	01:04:00		0.452113	4.94431	49.4431	98.8862
15	01:01:00	PEG 8000	0.45153	4.93793	49.3793	98.7586
16	01:02:00		0.41743	4.56501	45.6501	91.3003
17	01:02:00		0.4228	4.62374	46.2374	92.4748
18	01:04:00		0.44813	4.90075	49.0075	98.015
OPTIMIZED	01:04:00	PEG 8000	0.43789	4.78877	47.8877	95.7753

## Sheet: Dissolution Data
Run	Ratio (D:P)	Polymer	Mean Drug Content (%)	Dissolution						DE % at 15 min.	DE% at 60 min.	MDT	F2
				5	10	15	30	45	60
1	01:01:00	PVP 25	95.515	24.501	43.61	75.14	93.24	94.17	95.34	35.227	76.9693	11.5612	15.8819
2	01:01:00		93.984	23.4	41.24	70.6	88.34	89.31	92.46	33.3133	73.1233	12.5481	17.6125
3	01:02:00		93.9949	49.17	71.23	75.478	76.789	88.31	94.147	52.713	75.6561	11.7843	14.5165
4	01:02:00		89.7605	48.501	69.66	71.37	71.362	85.713	92.346	51.282	72.5538	12.8596	15.6665
5	01:04:00		96.005	16.887	42.686	52.2899	76.218	89.179	98.435	28.5727	67.333	10.8773	20.2017
6	01:01:00	PVP 90	92.606	31.324	40.73	46.61	60.38	89.7	94.69	31.7863	63.1291	19.9985	21.9834
7	01:01:00		89.4477	28.76	37.91	44.57	56.917	88.94	93.843	29.6517	61.1788	20.8844	23.0713
8	01:02:00		93.5881	10.538	18.79	23.49	40.89	55.7	76.178	13.691	40.0287	28.4722	42.11
9	01:02:00		96.2018	11.781	20.781	25.147	44.379	60.196	77.189	15.0452	42.697	26.811	39.3621
10	01:04:00		96.5168	33.6647	46.632	61.273	80.369	89.789	97.697	36.9778	71.6552	15.9934	17.9963
11	01:01:00	PEG 4000	93.1266	42.9793	50.2283	49.315	55.352	64.1382	71.672	39.2882	54.8179	14.1093	25.1421
12	01:02:00		96.7114	31.4	33.28	35.612	44.697	55.421	60.617	27.4953	43.932	16.5152	35.7705
13	01:02:00		100.681	29.891	34.307	35.821	40.57	51.88	60.1557	27.3695	41.952	18.1568	36.7366
14	01:04:00		98.8862	42.96	49.22	55.48	78.169	88.168	96.303	39.9733	70.5505	16.0447	18.1815
15	01:01:00	PEG 8000	98.7586	80.561	81.67	84.34	83.19	85.91	94.43	68.1337	81.6547	8.11734	10.6434
16	01:02:00		92.4748	37.687	62.281	79.4839	87.11	87.83	94.15	46.57	77.0817	10.8773	14.8138
17	01:02:00		91.3003	35.743	60.73	75.92	84.39	86.91	93.178	44.811	75.165	11.5991	15.7002
18	01:04:00		98.015	90.23	95.01	99.64	102.51	101.11	103.8	78.3533	95.9233	4.55299	6.36107
		Diacerein (Raw)	100	4.893	9.631	13.278	32.973	42.371	48.347	7.05433	28.3027	24.8755	_
OPTIMIZED	01:04:00	PEG 8000	95.7753	87.273	92.478	95.197	96.148	98.349	99.127	75.7832	91.8605	4.39827	7.50043

## Sheet: DDSample
DDSolver 1.0		Sample Data for Dissolution Data Modeling of Zero-order Model
Time Unit	min			Analyst	Windows User
Model	Zero-order			Date	2019-01-27
Equation	F=k0*t			Time	22:49:33
Time	No.1	No.2	No.3	No.4	No.5	No.6	No.7	No.8	No.9	No.10	No.11	No.12	No.13	No.14	No.15	No.16	No.17	No.18
(min)	F(%)	F(%)	F(%)	F(%)	F(%)	F(%)	F(%)	F(%)	F(%)	F(%)	F(%)	F(%)	F(%)	F(%)	F(%)	F(%)	F(%)	F(%)
5	24.501	23.4	49.17	48.501	16.887	31.324	28.76	10.538	11.781	33.6647	80.561	37.687	35.743	90.23	42.9793	31.4	29.891	42.96
10	43.61	41.24	71.23	69.66	42.686	40.73	37.91	18.79	20.781	46.632	81.67	62.281	60.73	95.01	50.2283	33.28	34.307	49.22
15	75.14	70.6	75.478	71.37	52.2899	46.61	44.57	23.49	25.147	61.273	84.34	79.4839	75.92	99.64	49.315	35.612	35.821	55.48
30	93.24	88.34	76.789	71.362	76.218	60.38	56.917	40.89	44.379	80.369	83.19	87.11	84.39	102.51	55.352	44.697	40.57	78.169
45	94.17	89.31	88.31	85.713	89.179	89.7	88.94	55.7	60.196	89.789	85.91	87.83	86.91	101.11	64.1382	55.421	51.88	88.168
60	95.34	92.46	94.147	92.346	98.435	94.69	93.843	76.178	77.189	97.697	94.43	94.15	93.178	103.8	71.672	60.617	60.1557	96.303

## Sheet: First order modeling
DDSolver 1.0		Dissolution Data Modeling of First-order Model
Time Unit	min			Analyst	fady adel
Model	First-order			Date	2019-02-02
Equation	F=100*[1-Exp(-k1*t)]			Time	14:36:02
Time	No.1	No.2	No.3	No.4	No.5	No.6	No.7	No.8	No.9	No.10	No.11	No.12	No.13	No.14	No.15	No.16	No.17	No.18
(min)	F(%)	F(%)	F(%)	F(%)	F(%)	F(%)	F(%)	F(%)	F(%)	F(%)	F(%)	F(%)	F(%)	F(%)	F(%)	F(%)	F(%)	F(%)	Mean	SD	RSD(%)
5	24.501	23.4	49.17	48.501	16.887	31.324	28.76	10.538	11.781	33.6647	80.561	37.687	35.743	90.23	42.9793	31.4	29.891	42.96	37.221	20.8057	55.8977
10	43.61	41.24	71.23	69.66	42.686	40.73	37.91	18.79	20.781	46.632	81.67	62.281	60.73	95.01	50.2283	33.28	34.307	49.22	49.9997	20.1478	40.2958
15	75.14	70.6	75.478	71.37	52.2899	46.61	44.57	23.49	25.147	61.273	84.34	79.4839	75.92	99.64	49.315	35.612	35.821	55.48	58.9767	21.4593	36.3862
30	93.24	88.34	76.789	71.362	76.218	60.38	56.917	40.89	44.379	80.369	83.19	87.11	84.39	102.51	55.352	44.697	40.57	78.169	70.2707	19.3348	27.5147
45	94.17	89.31	88.31	85.713	89.179	89.7	88.94	55.7	60.196	89.789	85.91	87.83	86.91	101.11	64.1382	55.421	51.88	88.168	80.6875	15.378	19.0588
60	95.34	92.46	94.147	92.346	98.435	94.69	93.843	76.178	77.189	97.697	94.43	94.15	93.178	103.8	71.672	60.617	60.1557	96.303	88.1462	13.0267	14.7785
Time	No.1	No.2	No.3	No.4	No.5	No.6	No.7	No.8	No.9	No.10	No.11	No.12	No.13	No.14	No.15	No.16	No.17	No.18
(min)	F(%)_Pre	F(%)_Pre	F(%)_Pre	F(%)_Pre	F(%)_Pre	F(%)_Pre	F(%)_Pre	F(%)_Pre	F(%)_Pre	F(%)_Pre	F(%)_Pre	F(%)_Pre	F(%)_Pre	F(%)_Pre	F(%)_Pre	F(%)_Pre	F(%)_Pre	F(%)_Pre	Mean	SD	RSD(%)
5	30.2044	27.3185	41.5063	37.772	22.0256	19.6175	18.2868	9.36478	10.1482	26.7432	71.2918	37.4538	34.866	89.406	15.6538	9.90358	9.28452	26.615	29.859	21.2857	71.2873
10	51.2858	47.174	65.7848	61.2768	39.1999	35.3865	33.2296	17.8526	19.2666	46.3345	91.7584	60.8798	57.5756	98.8777	28.8572	18.8264	17.707	46.1464	46.5233	23.7094	50.9624
15	65.9996	61.6053	79.9863	75.9034	52.5914	48.0621	45.4398	25.5455	27.4597	60.6864	97.634	75.5318	72.3673	99.8811	39.9938	26.8655	25.3475	60.4796	57.8544	23.4698	40.5669
30	88.4398	85.2584	95.9945	94.1935	77.5243	73.0245	70.2318	44.5653	47.379	84.5444	99.944	94.0131	92.3643	99.9999	63.9926	46.5134	44.2701	84.3814	77.0352	19.8657	25.7878
45	96.0695	94.34	99.1984	98.6008	89.3446	85.9895	83.7584	58.7263	61.8285	93.9238	99.9987	98.5351	97.8901	100	78.3933	60.8828	58.3962	93.8274	86.0946	15.5551	18.0674
60	98.6636	97.8269	99.8396	99.6628	94.9484	92.7232	91.1386	69.2699	72.3103	97.6112	100	99.6416	99.417	100	87.0346	71.3918	68.9418	97.5606	90.999	11.8313	13.0015
Best-fit Values
Parameter	No.1	No.2	No.3	No.4	No.5	No.6	No.7	No.8	No.9	No.10	No.11	No.12	No.13	No.14	No.15	No.16	No.17	No.18	Mean	SD	RSD(%)
k1	0.0719199	0.0638167	0.10725	0.0948732	0.0497578	0.0436747	0.040391	0.0196655	0.0214018	0.0622399	0.249597	0.0938531	0.0857446	0.448977	0.0340481	0.020858	0.0194884	0.0618902	0.0883026	0.104593	118.448
Secondary Parameter
Parameter	No.1	No.2	No.3	No.4	No.5	No.6	No.7	No.8	No.9	No.10	No.11	No.12	No.13	No.14	No.15	No.16	No.17	No.18	Mean	SD	RSD(%)
T25	4.00003	4.50795	2.68235	3.03228	5.78165	6.58692	7.12242	14.6288	13.4419	4.62215	1.15258	3.06524	3.3551	0.64075	8.44927	13.7924	14.7617	4.64827	6.45955	4.65751	72.1027
T50	9.63776	10.8615	6.4629	7.30604	13.9304	15.8707	17.1609	35.2469	32.3873	11.1367	2.77706	7.38545	8.08385	1.54384	20.3579	33.2318	35.5671	11.1996	15.5638	11.2219	72.1027
T75	19.2755	21.7231	12.9258	14.6121	27.8608	31.7413	34.3218	70.4939	64.7746	22.2734	5.55412	14.7709	16.1677	3.08767	40.7157	66.4636	71.1342	22.3993	31.1275	22.4438	72.1027
T80	22.3782	25.2197	15.0064	16.9641	32.3454	36.8505	39.8464	81.8408	75.201	25.8586	6.44814	17.1485	18.7701	3.58468	47.2695	77.1618	82.5842	26.0047	36.1379	26.0564	72.1027
T90	32.0159	36.0813	21.4693	24.2701	46.2759	52.7212	57.0073	117.088	107.588	36.9953	9.2252	24.5339	26.854	5.12851	67.6273	110.394	118.151	37.2044	51.7017	37.2783	72.1027
Goodness of Fit
Parameter	No.1	No.2	No.3	No.4	No.5	No.6	No.7	No.8	No.9	No.10	No.11	No.12	No.13	No.14	No.15	No.16	No.17	No.18
N_observed	6	6	6	6	6	6	6	6	6	6	6	6	6	6	6	6	6	6
DF	5	5	5	5	5	5	5	5	5	5	5	5	5	5	5	5	5	5
R_obs-pre	0.979209	0.977735	0.940344	0.905208	0.995655	0.962634	0.960829	0.988177	0.992968	0.995556	0.557762	0.982389	0.983071	0.8594	0.957591	0.988182	0.972512	0.972814
Rsqr	0.95329	0.953298	0.486595	0.178391	0.988982	0.900126	0.906594	0.975299	0.985679	0.97402	-6.03895	0.90672	0.891795	0.715863	-2.22802	-0.196261	-0.401081	0.847225
Rsqr_adj	0.95329	0.953298	0.486595	0.178391	0.988982	0.900126	0.906594	0.975299	0.985679	0.97402	-6.03895	0.90672	0.891795	0.715863	-2.22802	-0.196261	-0.401081	0.847225
MSE	42.538	39.0145	125.704	189.37	10.5078	69.0447	68.7595	15.3737	9.15489	16.5755	174.927	42.0092	49.2835	7.53378	360.833	179.347	188.645	74.7611
MSE_root	6.52211	6.24616	11.2118	13.7612	3.24157	8.30931	8.29213	3.92093	3.02571	4.0713	13.226	6.48145	7.02022	2.74477	18.9956	13.392	13.7348	8.64645
Weighting	1	1	1	1	1	1	1	1	1	1	1	1	1	1	1	1	1	1
SS	212.69	195.072	628.52	946.85	52.5389	345.223	343.797	76.8684	45.7745	82.8774	874.636	210.046	246.417	37.6689	1804.17	896.733	943.227	373.805
WSS	212.69	195.072	628.52	946.85	52.5389	345.223	343.797	76.8684	45.7745	82.8774	874.636	210.046	246.417	37.6689	1804.17	896.733	943.227	373.805
AIC	34.159	33.6402	40.6602	43.1188	25.7693	37.0651	37.0403	28.0526	24.9424	28.5042	42.6428	34.084	35.0422	23.773	46.9871	42.7925	43.0958	37.5424
MSC	2.73046	2.73064	0.333357	-0.136843	4.17492	1.97052	2.03747	3.36758	3.9127	3.31711	-2.28479	2.03881	1.8904	0.924966	-1.5052	-0.512534	-0.670577	1.54546
Predicted Data
Time	No.1	No.2	No.3	No.4	No.5	No.6	No.7	No.8	No.9	No.10	No.11	No.12	No.13	No.14	No.15	No.16	No.17	No.18
(min)	F(%)_Pre	F(%)_Pre	F(%)_Pre	F(%)_Pre	F(%)_Pre	F(%)_Pre	F(%)_Pre	F(%)_Pre	F(%)_Pre	F(%)_Pre	F(%)_Pre	F(%)_Pre	F(%)_Pre	F(%)_Pre	F(%)_Pre	F(%)_Pre	F(%)_Pre	F(%)_Pre	Mean	SD	RSD(%)
0	0	0	0	0	0	0	0	0	0	0	0	0	0	0	0	0	0	0	0	0
1.2	8.26846	7.37212	12.0762	10.7606	5.79617	5.106	4.73134	2.33223	2.53552	7.19669	25.8824	10.6513	9.7777	41.6536	4.00343	2.47189	2.31148	7.15774	9.44916	9.74855	103.168
2.4	15.8532	14.2008	22.6941	20.3633	11.2564	9.95129	9.23882	4.61006	5.00675	13.8755	45.0658	20.1681	18.5994	65.957	7.84659	4.88268	4.56953	13.8031	17.1079	15.5206	90.7218
3.6	22.8109	20.526	32.0298	28.9327	16.4001	14.5492	13.533	6.83478	7.41532	20.0736	59.2841	28.6713	26.5585	80.1371	11.5359	7.23387	6.77538	19.9729	23.5152	18.9642	80.6463
4.8	29.1932	26.3849	40.238	36.58	21.2457	18.9123	17.6241	9.0076	9.76283	25.8256	69.8223	36.2687	33.7394	88.4107	15.0775	9.52695	8.93025	25.701	29.014	21.032	72.4893
6	35.0479	31.8119	47.455	43.4044	25.8104	23.0526	21.5216	11.1298	12.0508	31.1637	77.633	43.0569	40.2181	93.2381	18.4773	11.7633	11.0353	31.0191	33.8272	22.2759	65.8521
7.2	40.4184	36.8388	53.8005	49.4944	30.1106	26.9816	25.2346	13.2024	14.2808	36.1177	83.4221	49.1221	46.0634	96.0547	21.741	13.9445	13.0917	35.9566	38.1042	23.017	60.4054
8.4	45.3449	41.4951	59.3796	54.9292	34.1615	30.7099	28.772	15.2267	16.4542	40.7151	87.7129	54.5413	51.3372	97.698	24.8741	16.0717	15.1006	40.5407	41.948	23.4436	55.8872
9.6	49.864	45.8082	64.2851	59.7791	37.9776	34.2478	32.1421	17.2038	18.5725	44.9816	90.8931	59.3832	56.0953	98.6569	27.8817	18.1463	17.063	44.7966	45.4321	23.6674	52.094
10.8	54.0095	49.8032	68.5981	64.1071	41.5725	37.6051	35.3527	19.1348	20.6371	48.9412	93.2502	63.7095	60.3882	99.2163	30.7689	20.1696	18.9801	48.7479	48.6107	23.7556	48.8692
12	57.8122	53.5038	72.3903	67.9694	44.9591	40.791	38.4113	21.0208	22.6494	52.6157	94.9972	67.5749	64.2613	99.5428	33.5405	22.1429	20.8528	52.4164	51.5251	23.7495	46.0931
13.2	61.3005	56.9316	75.7245	71.4161	48.1494	43.8142	41.3253	22.8628	24.6106	56.0258	96.292	71.0286	67.7557	99.7332	36.2012	24.0675	22.6823	55.8223	54.208	23.675	43.6744
14.4	64.5003	60.1066	78.656	74.4919	51.1547	46.6831	44.1014	24.6618	26.5221	59.1905	97.2517	74.1144	70.9085	99.8443	38.7553	25.9444	24.4695	58.9844	56.6856	23.5487	41.5426
15.6	67.4356	63.0476	81.2336	77.2367	53.9859	49.4054	46.7462	26.4188	28.3852	62.1274	97.9631	76.8716	73.7529	99.9092	41.2072	27.775	26.2154	61.9202	58.9798	23.3818	39.6437
16.8	70.1282	65.7718	83.4999	79.6862	56.6529	51.9888	49.2658	28.1349	30.201	64.853	98.4903	79.3351	76.3193	99.947	43.5609	29.5603	27.9209	64.6459	61.109	23.1821	37.9356
18	72.5981	68.2951	85.4925	81.8721	59.1654	54.4402	51.6662	29.811	31.9708	67.3824	98.881	81.5361	78.6347	99.9691	45.8204	31.3015	29.587	67.1764	63.0889	22.9553	36.3856
19.2	74.8638	70.6324	87.2444	83.8228	61.5322	56.7665	53.953	31.448	33.6957	69.7298	99.1706	83.5028	80.7238	99.982	47.9895	32.9997	31.2146	69.5259	64.9332	22.7056	34.9676
20.4	76.9422	72.7975	88.7848	85.5635	63.7619	58.974	56.1317	33.0467	35.3768	71.9083	99.3853	85.26	82.6085	99.9895	50.0717	34.6559	32.8045	71.7071	66.6539	22.4366	33.6613
21.6	78.8487	74.8029	90.1392	87.117	65.8623	61.0688	58.2072	34.6082	37.0154	73.9299	99.5444	86.83	84.309	99.9939	52.0705	36.2711	34.3577	73.7322	68.2616	22.1511	32.4503
22.8	80.5976	76.6604	91.33	88.5033	67.841	63.0566	60.1846	36.1333	38.6123	75.8061	99.6623	88.2327	85.8432	99.9964	53.9894	37.8464	35.875	75.6124	69.7657	21.8516	31.3214
24	82.2019	78.381	92.377	89.7404	69.705	64.943	62.0684	37.6228	40.1688	77.5473	99.7497	89.4861	87.2274	99.9979	55.8314	39.3828	37.3573	77.358	71.1748	21.5402	30.2638
25.2	83.6735	79.9748	93.2976	90.8444	71.4609	66.733	63.863	39.0776	41.6859	79.1631	99.8145	90.606	88.4763	99.9988	57.5996	40.8812	38.8052	78.9787	72.4963	21.2189	29.2689
26.4	85.0235	81.4511	94.107	91.8296	73.1151	68.4316	65.5728	40.4985	43.1644	80.6627	99.8625	91.6066	89.6031	99.9993	59.2971	42.3425	40.2197	80.4833	73.7372	20.8893	28.3293
27.6	86.2618	82.8185	94.8186	92.7088	74.6734	70.0435	67.2017	41.8862	44.6055	82.0543	99.8981	92.5006	90.6196	99.9996	60.9266	43.7677	41.6016	81.8803	74.9037	20.553	27.4392
28.8	87.3977	84.0852	95.4444	93.4934	76.1414	71.5731	68.7535	43.2415	46.0101	83.3458	99.9245	93.2994	91.5368	99.9998	62.4909	45.1577	42.9514	83.1772	76.0013	20.2113	26.5934
30	88.4398	85.2584	95.9945	94.1935	77.5243	73.0245	70.2318	44.5653	47.379	84.5444	99.944	94.0131	92.3643	99.9999	63.9926	46.5134	44.2701	84.3814	77.0352	19.8657	25.7878
31.2	89.3956	86.3452	96.4782	94.8183	78.827	74.4019	71.6403	45.8581	48.7132	85.6567	99.9585	94.6508	93.1109	99.9999	65.4341	47.8355	45.5583	85.4993	78.0101	19.5171	25.0187
32.4	90.2724	87.3519	96.9035	95.3759	80.0542	75.7089	72.9821	47.1208	50.0136	86.6889	99.9692	95.2205	93.7845	100	66.8179	49.125	46.8167	86.5372	78.9302	19.1666	24.283
33.6	91.0768	88.2843	97.2775	95.8735	81.2103	76.9492	74.2604	48.3541	51.281	87.6469	99.9772	95.7296	94.3922	100	68.1463	50.3825	48.046	87.5009	79.7994	18.8152	23.5781
34.8	91.8146	89.148	97.6062	96.3175	82.2994	78.1262	75.4782	49.5586	52.5163	88.5359	99.9831	96.1845	94.9406	100	69.4216	51.609	49.2469	88.3955	80.6212	18.4636	22.9017
36	92.4914	89.948	97.8953	96.7138	83.3254	79.2431	76.6384	50.735	53.7202	89.3609	99.9875	96.5909	95.4353	100	70.6458	52.8052	50.4201	89.2261	81.399	18.1126	22.2516
37.2	93.1122	90.6891	98.1495	97.0674	84.2918	80.3029	77.7437	51.884	54.8937	90.1266	99.9907	96.954	95.8816	100	71.8209	53.9718	51.5661	89.9973	82.1357	17.7629	21.6263
38.4	93.6817	91.3755	98.373	97.383	85.2023	81.3087	78.7968	53.0062	56.0374	90.8372	99.9931	97.2784	96.2843	100	72.9491	55.1096	52.6856	90.7133	82.8342	17.4151	21.024
39.6	94.2042	92.0113	98.5694	97.6646	86.06	82.263	79.7999	54.1022	57.152	91.4966	99.9949	97.5683	96.6476	100	74.032	56.2192	53.7793	91.378	83.4968	17.0696	20.4434
40.8	94.6834	92.6002	98.7422	97.9159	86.868	83.1687	80.7557	55.1726	58.2385	92.1085	99.9962	97.8273	96.9754	100	75.0716	57.3014	54.8477	91.9951	84.126	16.7269	19.8831
42	95.123	93.1457	98.8941	98.1401	87.6292	84.0281	81.6662	56.2181	59.2973	92.6765	99.9972	98.0587	97.2711	100	76.0696	58.3569	55.8914	92.5681	84.724	16.3874	19.3421
43.2	95.5262	93.651	99.0276	98.3403	88.3462	84.8436	82.5336	57.2392	60.3293	93.2035	99.9979	98.2655	97.5379	100	77.0277	59.3863	56.9109	93.1	85.2926	16.0515	18.8194
44.4	95.8962	94.1191	99.1451	98.5189	89.0217	85.6175	83.36	58.2365	61.3352	93.6926	99.9985	98.4502	97.7787	100	77.9474	60.3902	57.9069	93.5939	85.8338	15.7195	18.3139
45.6	96.2355	94.5526	99.2483	98.6783	89.658	86.3519	84.1473	59.2105	62.3156	94.1466	99.9989	98.6153	97.9959	100	78.8302	61.3693	58.8799	94.0525	86.3492	15.3916	17.8249
46.8	96.5467	94.9542	99.3391	98.8205	90.2574	87.0488	84.8974	60.1618	63.2711	94.5678	99.9992	98.7628	98.1918	100	79.6777	62.3242	59.8304	94.4782	86.8405	15.0681	17.3515
48	96.8323	95.3262	99.4189	98.9474	90.8221	87.71	85.6119	61.0909	64.2023	94.9588	99.9994	98.8946	98.3686	100	80.4913	63.2555	60.7589	94.8734	87.309	14.7491	16.893
49.2	97.0942	95.6708	99.4891	99.0607	91.3541	88.3376	86.2927	61.9984	65.11	95.3216	99.9995	99.0123	98.5281	100	81.2723	64.1638	61.6659	95.2404	87.7562	14.4348	16.4487
50.4	97.3345	95.9899	99.5508	99.1617	91.8552	88.9331	86.9412	62.8846	65.9946	95.6583	99.9997	99.1175	98.672	100	82.0221	65.0496	62.552	95.581	88.1832	14.1253	16.0181
51.6	97.5549	96.2855	99.605	99.252	92.3273	89.4981	87.5591	63.7503	66.8568	95.9707	99.9997	99.2115	98.8019	100	82.7418	65.9136	63.4176	95.8973	88.5913	13.8207	15.6005
52.8	97.757	96.5594	99.6527	99.3324	92.772	90.0344	88.1477	64.5957	67.6972	96.2607	99.9998	99.2955	98.919	100	83.4327	66.7561	64.2632	96.191	88.9815	13.5212	15.1955
54	97.9425	96.813	99.6947	99.4043	93.191	90.5432	88.7085	65.4214	68.5162	96.5298	99.9999	99.3705	99.0247	100	84.096	67.5779	65.0893	96.4636	89.3548	13.2267	14.8024
55.2	98.1126	97.048	99.7315	99.4684	93.5856	91.0261	89.2427	66.2278	69.3145	96.7795	99.9999	99.4376	99.1201	100	84.7327	68.3793	65.8962	96.7168	89.7122	12.9373	14.4209
56.4	98.2687	97.2656	99.764	99.5256	93.9574	91.4843	89.7517	67.0155	70.0925	97.0113	99.9999	99.4975	99.2061	100	85.3439	69.161	66.6845	96.9518	90.0545	12.653	14.0504
57.6	98.4118	97.4672	99.7925	99.5766	94.3077	91.9191	90.2365	67.7848	70.8509	97.2264	99.9999	99.551	99.2837	100	85.9307	69.9233	67.4546	97.1699	90.3826	12.374	13.6907
58.8	98.5431	97.6539	99.8175	99.6222	94.6376	92.3317	90.6985	68.5361	71.5899	97.426	100	99.5988	99.3538	100	86.4939	70.6667	68.2069	97.3725	90.6972	12.1	13.3411
60	98.6636	97.8269	99.8396	99.6628	94.9484	92.7232	91.1386	69.2699	72.3103	97.6112	100	99.6416	99.417	100	87.0346	71.3918	68.9418	97.5606	90.999	11.8313	13.0015

## Sheet: zero order modeling
DDSolver 1.0		Dissolution Data Modeling of Zero-order Model
Time Unit	min			Analyst	fady adel
Model	Zero-order			Date	2019-02-02
Equation	F=k0*t			Time	14:34:31
Time	No.1	No.2	No.3	No.4	No.5	No.6	No.7	No.8	No.9	No.10	No.11	No.12	No.13	No.14	No.15	No.16	No.17	No.18
(min)	F(%)	F(%)	F(%)	F(%)	F(%)	F(%)	F(%)	F(%)	F(%)	F(%)	F(%)	F(%)	F(%)	F(%)	F(%)	F(%)	F(%)	F(%)	Mean	SD	RSD(%)
5	24.501	23.4	49.17	48.501	16.887	31.324	28.76	10.538	11.781	33.6647	80.561	37.687	35.743	90.23	42.9793	31.4	29.891	42.96	37.221	20.8057	55.8977
10	43.61	41.24	71.23	69.66	42.686	40.73	37.91	18.79	20.781	46.632	81.67	62.281	60.73	95.01	50.2283	33.28	34.307	49.22	49.9997	20.1478	40.2958
15	75.14	70.6	75.478	71.37	52.2899	46.61	44.57	23.49	25.147	61.273	84.34	79.4839	75.92	99.64	49.315	35.612	35.821	55.48	58.9767	21.4593	36.3862
30	93.24	88.34	76.789	71.362	76.218	60.38	56.917	40.89	44.379	80.369	83.19	87.11	84.39	102.51	55.352	44.697	40.57	78.169	70.2707	19.3348	27.5147
45	94.17	89.31	88.31	85.713	89.179	89.7	88.94	55.7	60.196	89.789	85.91	87.83	86.91	101.11	64.1382	55.421	51.88	88.168	80.6875	15.378	19.0588
60	95.34	92.46	94.147	92.346	98.435	94.69	93.843	76.178	77.189	97.697	94.43	94.15	93.178	103.8	71.672	60.617	60.1557	96.303	88.1462	13.0267	14.7785
Time	No.1	No.2	No.3	No.4	No.5	No.6	No.7	No.8	No.9	No.10	No.11	No.12	No.13	No.14	No.15	No.16	No.17	No.18
(min)	F(%)_Pre	F(%)_Pre	F(%)_Pre	F(%)_Pre	F(%)_Pre	F(%)_Pre	F(%)_Pre	F(%)_Pre	F(%)_Pre	F(%)_Pre	F(%)_Pre	F(%)_Pre	F(%)_Pre	F(%)_Pre	F(%)_Pre	F(%)_Pre	F(%)_Pre	F(%)_Pre	Mean	SD	RSD(%)
5	10.5025	10.0401	10.194	9.85335	9.81916	9.30354	9.11407	6.47041	6.77487	10.0852	10.5542	10.3405	10.1514	12.1812	7.49382	6.1788	5.95701	9.91273	9.1626	1.7872	19.5054
10	21.005	20.0802	20.388	19.7067	19.6383	18.6071	18.2281	12.9408	13.5497	20.1704	21.1084	20.681	20.3028	24.3623	14.9876	12.3576	11.914	19.8255	18.3252	3.57441	19.5054
15	31.5075	30.1203	30.582	29.5601	29.4575	27.9106	27.3422	19.4112	20.3246	30.2556	31.6627	31.0214	30.4541	36.5435	22.4815	18.5364	17.871	29.7382	27.4878	5.36161	19.5054
30	63.0151	60.2407	61.164	59.1201	58.9149	55.8213	54.6844	38.8225	40.6492	60.5111	63.3253	62.0429	60.9083	73.087	44.9629	37.0728	35.742	59.4764	54.9756	10.7232	19.5054
45	94.5226	90.361	91.7461	88.6802	88.3724	83.7319	82.0266	58.2337	60.9739	90.7667	94.988	93.0643	91.3624	109.63	67.4444	55.6092	53.613	89.2146	82.4634	16.0848	19.5054
60	126.03	120.481	122.328	118.24	117.83	111.643	109.369	77.645	81.2985	121.022	126.651	124.086	121.817	146.174	89.9258	74.1456	71.4841	118.953	109.951	21.4465	19.5054
Best-fit Values
Parameter	No.1	No.2	No.3	No.4	No.5	No.6	No.7	No.8	No.9	No.10	No.11	No.12	No.13	No.14	No.15	No.16	No.17	No.18	Mean	SD	RSD(%)
k0	2.1005	2.00802	2.0388	1.97067	1.96383	1.86071	1.82281	1.29408	1.35497	2.01704	2.11084	2.0681	2.03028	2.43623	1.49876	1.23576	1.1914	1.98255	1.83252	0.357441	19.5054
Secondary Parameter
Parameter	No.1	No.2	No.3	No.4	No.5	No.6	No.7	No.8	No.9	No.10	No.11	No.12	No.13	No.14	No.15	No.16	No.17	No.18	Mean	SD	RSD(%)
T25	11.9019	12.4501	12.2621	12.686	12.7302	13.4357	13.7151	19.3187	18.4505	12.3944	11.8436	12.0884	12.3136	10.2617	16.6804	20.2305	20.9837	12.61	14.242	3.29895	23.1634
T50	23.8038	24.9001	24.5242	25.3721	25.4604	26.8715	27.4301	38.6374	36.9011	24.7888	23.6872	24.1768	24.6272	20.5235	33.3608	40.4609	41.9674	25.2201	28.4841	6.5979	23.1634
T75	35.7057	37.3502	36.7863	38.0581	38.1907	40.3072	41.1452	57.9561	55.3516	37.1832	35.5308	36.2653	36.9408	30.7852	50.0412	60.6914	62.9511	37.8301	42.7261	9.89684	23.1634
T80	38.0861	39.8402	39.2387	40.5953	40.7367	42.9944	43.8882	61.8198	59.0417	39.6621	37.8995	38.6829	39.4035	32.8376	53.3773	64.7375	67.1478	40.3521	45.5745	10.5566	23.1634
T90	42.8469	44.8202	44.1436	45.6697	45.8288	48.3687	49.3742	69.5473	66.4219	44.6199	42.637	43.5183	44.329	36.9423	60.0495	72.8296	75.5413	45.3962	51.2714	11.8762	23.1634
Goodness of Fit
Parameter	No.1	No.2	No.3	No.4	No.5	No.6	No.7	No.8	No.9	No.10	No.11	No.12	No.13	No.14	No.15	No.16	No.17	No.18
N_observed	6	6	6	6	6	6	6	6	6	6	6	6	6	6	6	6	6	6
DF	5	5	5	5	5	5	5	5	5	5	5	5	5	5	5	5	5	5
R_obs-pre	0.835545	0.850653	0.887221	0.900015	0.949405	0.984322	0.982204	0.998566	0.99874	0.955044	0.898584	0.820863	0.842658	0.827858	0.986589	0.99539	0.991435	0.981286
Rsqr	0.0191331	0.0805062	-4.85664	-4.6977	0.627001	0.517509	0.629426	0.974215	0.958699	0.0101666	-102.485	-1.83285	-1.52394	-133.249	-5.57214	-1.14326	-1.30407	-0.423229
Rsqr_adj	0.0191331	0.0805062	-4.85664	-4.6977	0.627001	0.517509	0.629426	0.974215	0.958699	0.0101666	-102.485	-1.83285	-1.52394	-133.249	-5.57214	-1.14326	-1.30407	-0.423229
MSE	893.258	768.14	1433.96	1313.24	355.736	333.556	272.793	16.0481	26.4023	631.53	2571.75	1275.78	1149.56	3559.55	734.646	321.324	310.226	696.465
MSE_root	29.8874	27.7153	37.8677	36.2387	18.861	18.2635	16.5165	4.00601	5.13832	25.1303	50.7124	35.7181	33.9052	59.662	27.1043	17.9255	17.6132	26.3906
Weighting	1	1	1	1	1	1	1	1	1	1	1	1	1	1	1	1	1	1
SS	4466.29	3840.7	7169.8	6566.22	1778.68	1667.78	1363.97	80.2407	132.012	3157.65	12858.7	6378.91	5747.82	17797.7	3673.23	1606.62	1551.13	3482.32
WSS	4466.29	3840.7	7169.8	6566.22	1778.68	1667.78	1363.97	80.2407	132.012	3157.65	12858.7	6378.91	5747.82	17797.7	3673.23	1606.62	1551.13	3482.32
AIC	52.4259	51.5205	55.2658	54.7382	46.9018	46.5155	45.3089	28.3102	31.2973	50.3455	58.7707	54.5645	53.9395	60.721	51.253	46.2913	46.0804	50.9327
MSC	-0.314015	-0.249401	-2.10091	-2.0734	0.652845	0.39546	0.65937	3.32464	2.85353	-0.323115	-4.97276	-1.37462	-1.25915	-5.23303	-2.21617	-1.09566	-1.16801	-0.686262
Predicted Data
Time	No.1	No.2	No.3	No.4	No.5	No.6	No.7	No.8	No.9	No.10	No.11	No.12	No.13	No.14	No.15	No.16	No.17	No.18
(min)	F(%)_Pre	F(%)_Pre	F(%)_Pre	F(%)_Pre	F(%)_Pre	F(%)_Pre	F(%)_Pre	F(%)_Pre	F(%)_Pre	F(%)_Pre	F(%)_Pre	F(%)_Pre	F(%)_Pre	F(%)_Pre	F(%)_Pre	F(%)_Pre	F(%)_Pre	F(%)_Pre	Mean	SD	RSD(%)
0	0	0	0	0	0	0	0	0	0	0	0	0	0	0	0	0	0	0	0	0
1.2	2.5206	2.40963	2.44656	2.3648	2.3566	2.23285	2.18738	1.5529	1.62597	2.42045	2.53301	2.48171	2.43633	2.92348	1.79852	1.48291	1.42968	2.37906	2.19902	0.428929	19.5054
2.4	5.04121	4.81925	4.89312	4.72961	4.71319	4.4657	4.37475	3.1058	3.25194	4.84089	5.06603	4.96343	4.87266	5.84696	3.59703	2.96583	2.85936	4.75811	4.39805	0.857858	19.5054
3.6	7.56181	7.22888	7.33969	7.09441	7.06979	6.69855	6.56213	4.6587	4.87791	7.26134	7.59904	7.44514	7.30899	8.77044	5.39555	4.44874	4.28904	7.13717	6.59707	1.28679	19.5054
4.8	10.0824	9.6385	9.78625	9.45922	9.42639	8.9314	8.7495	6.2116	6.50388	9.68178	10.1321	9.92686	9.74532	11.6939	7.19407	5.93165	5.71872	9.51623	8.7961	1.71572	19.5054
6	12.603	12.0481	12.2328	11.824	11.783	11.1643	10.9369	7.7645	8.12985	12.1022	12.6651	12.4086	12.1817	14.6174	8.99258	7.41456	7.14841	11.8953	10.9951	2.14465	19.5054
7.2	15.1236	14.4578	14.6794	14.1888	14.1396	13.3971	13.1243	9.3174	9.75582	14.5227	15.1981	14.8903	14.618	17.5409	10.7911	8.89748	8.57809	14.2743	13.1941	2.57357	19.5054
8.4	17.6442	16.8674	17.1259	16.5536	16.4962	15.63	15.3116	10.8703	11.3818	16.9431	17.7311	17.372	17.0543	20.4644	12.5896	10.3804	10.0078	16.6534	15.3932	3.0025	19.5054
9.6	20.1648	19.277	19.5725	18.9184	18.8528	17.8628	17.499	12.4232	13.0078	19.3636	20.2641	19.8537	19.4906	23.3878	14.3881	11.8633	11.4374	19.0325	17.5922	3.43143	19.5054
10.8	22.6854	21.6866	22.0191	21.2832	21.2094	20.0957	19.6864	13.9761	14.6337	21.784	22.7971	22.3354	21.927	26.3113	16.1867	13.3462	12.8671	21.4115	19.7912	3.86036	19.5054
12	25.206	24.0963	24.4656	23.648	23.566	22.3285	21.8738	15.529	16.2597	24.2045	25.3301	24.8171	24.3633	29.2348	17.9852	14.8291	14.2968	23.7906	21.9902	4.28929	19.5054
13.2	27.7266	26.5059	26.9122	26.0129	25.9226	24.5614	24.0611	17.0819	17.8857	26.6249	27.8631	27.2989	26.7996	32.1583	19.7837	16.312	15.7265	26.1696	24.1893	4.71822	19.5054
14.4	30.2472	28.9155	29.3587	28.3777	28.2792	26.7942	26.2485	18.6348	19.5116	29.0453	30.3962	29.7806	29.236	35.0818	21.5822	17.795	17.1562	28.5487	26.3883	5.14715	19.5054
15.6	32.7678	31.3251	31.8053	30.7425	30.6358	29.0271	28.4359	20.1877	21.1376	31.4658	32.9292	32.2623	31.6723	38.0052	23.3807	19.2779	18.5859	30.9277	28.5873	5.57608	19.5054
16.8	35.2884	33.7348	34.2519	33.1073	32.9924	31.2599	30.6233	21.7406	22.7636	33.8862	35.4622	34.744	34.1086	40.9287	25.1792	20.7608	20.0155	33.3068	30.7863	6.00501	19.5054
18	37.809	36.1444	36.6984	35.4721	35.349	33.4928	32.8106	23.2935	24.3895	36.3067	37.9952	37.2257	36.545	43.8522	26.9778	22.2437	21.4452	35.6858	32.9854	6.43394	19.5054
19.2	40.3296	38.554	39.145	37.8369	37.7056	35.7256	34.998	24.8464	26.0155	38.7271	40.5282	39.7074	38.9813	46.7757	28.7763	23.7266	22.8749	38.0649	35.1844	6.86287	19.5054
20.4	42.8503	40.9636	41.5915	40.2017	40.0622	37.9585	37.1854	26.3993	27.6415	41.1476	43.0612	42.1891	41.4176	49.6991	30.5748	25.2095	24.3046	40.444	37.3834	7.29179	19.5054
21.6	45.3709	43.3733	44.0381	42.5665	42.4188	40.1913	39.3728	27.9522	29.2675	43.568	45.5942	44.6709	43.854	52.6226	32.3733	26.6924	25.7343	42.823	39.5824	7.72072	19.5054
22.8	47.8915	45.7829	46.4847	44.9313	44.7753	42.4242	41.5601	29.5051	30.8934	45.9885	48.1273	47.1526	46.2903	55.5461	34.1718	28.1753	27.1639	45.2021	41.7815	8.14965	19.5054
24	50.4121	48.1925	48.9312	47.2961	47.1319	44.657	43.7475	31.058	32.5194	48.4089	50.6603	49.6343	48.7266	58.4696	35.9703	29.6583	28.5936	47.5811	43.9805	8.57858	19.5054
25.2	52.9327	50.6021	51.3778	49.6609	49.4885	46.8899	45.9349	32.6109	34.1454	50.8293	53.1933	52.116	51.1629	61.3931	37.7689	31.1412	30.0233	49.9602	46.1795	9.00751	19.5054
26.4	55.4533	53.0118	53.8244	52.0257	51.8451	49.1227	48.1223	34.1638	35.7713	53.2498	55.7263	54.5977	53.5993	64.3165	39.5674	32.6241	31.453	52.3392	48.3785	9.43644	19.5054
27.6	57.9739	55.4214	56.2709	54.3905	54.2017	51.3556	50.3096	35.7167	37.3973	55.6702	58.2593	57.0794	56.0356	67.24	41.3659	34.107	32.8827	54.7183	50.5776	9.86537	19.5054
28.8	60.4945	57.831	58.7175	56.7553	56.5583	53.5884	52.497	37.2696	39.0233	58.0907	60.7923	59.5611	58.4719	70.1635	43.1644	35.5899	34.3123	57.0974	52.7766	10.2943	19.5054
30	63.0151	60.2407	61.164	59.1201	58.9149	55.8213	54.6844	38.8225	40.6492	60.5111	63.3253	62.0429	60.9083	73.087	44.9629	37.0728	35.742	59.4764	54.9756	10.7232	19.5054
31.2	65.5357	62.6503	63.6106	61.4849	61.2715	58.0541	56.8718	40.3754	42.2752	62.9316	65.8583	64.5246	63.3446	76.0105	46.7614	38.5557	37.1717	61.8555	57.1746	11.1522	19.5054
32.4	68.0563	65.0599	66.0572	63.8497	63.6281	60.287	59.0591	41.9283	43.9012	65.352	68.3914	67.0063	65.7809	78.9339	48.56	40.0386	38.6014	64.2345	59.3737	11.5811	19.5054
33.6	70.5769	67.4695	68.5037	66.2145	65.9847	62.5198	61.2465	43.4812	45.5271	67.7725	70.9244	69.488	68.2173	81.8574	50.3585	41.5216	40.0311	66.6136	61.5727	12.01	19.5054
34.8	73.0975	69.8792	70.9503	68.5793	68.3413	64.7527	63.4339	45.0341	47.1531	70.1929	73.4574	71.9697	70.6536	84.7809	52.157	43.0045	41.4608	68.9926	63.7717	12.4389	19.5054
36	75.6181	72.2888	73.3969	70.9441	70.6979	66.9855	65.6213	46.587	48.7791	72.6134	75.9904	74.4514	73.0899	87.7044	53.9555	44.4874	42.8904	71.3717	65.9707	12.8679	19.5054
37.2	78.1387	74.6984	75.8434	73.3089	73.0545	69.2184	67.8086	48.1399	50.4051	75.0338	78.5234	76.9331	75.5263	90.6279	55.754	45.9703	44.3201	73.7507	68.1698	13.2968	19.5054
38.4	80.6593	77.108	78.29	75.6737	75.4111	71.4512	69.996	49.6928	52.031	77.4542	81.0564	79.4149	77.9626	93.5513	57.5525	47.4532	45.7498	76.1298	70.3688	13.7257	19.5054
39.6	83.1799	79.5177	80.7365	78.0386	77.7677	73.6841	72.1834	51.2457	53.657	79.8747	83.5894	81.8966	80.3989	96.4748	59.3511	48.9361	47.1795	78.5089	72.5678	14.1547	19.5054
40.8	85.7005	81.9273	83.1831	80.4034	80.1243	75.9169	74.3708	52.7986	55.283	82.2951	86.1225	84.3783	82.8352	99.3983	61.1496	50.419	48.6092	80.8879	74.7668	14.5836	19.5054
42	88.2211	84.3369	85.6297	82.7682	82.4809	78.1498	76.5581	54.3515	56.9089	84.7156	88.6555	86.86	85.2716	102.322	62.9481	51.902	50.0388	83.267	76.9659	15.0125	19.5054
43.2	90.7417	86.7465	88.0762	85.133	84.8375	80.3826	78.7455	55.9044	58.5349	87.136	91.1885	89.3417	87.7079	105.245	64.7466	53.3849	51.4685	85.646	79.1649	15.4414	19.5054
44.4	93.2623	89.1562	90.5228	87.4978	87.1941	82.6155	80.9329	57.4573	60.1609	89.5565	93.7215	91.8234	90.1442	108.169	66.5451	54.8678	52.8982	88.0251	81.3639	15.8704	19.5054
45.6	95.7829	91.5658	92.9693	89.8626	89.5507	84.8483	83.1203	59.0102	61.7868	91.9769	96.2545	94.3051	92.5806	111.092	68.3436	56.3507	54.3279	90.4041	83.5629	16.2993	19.5054
46.8	98.3035	93.9754	95.4159	92.2274	91.9073	87.0812	85.3077	60.5631	63.4128	94.3974	98.7875	96.7868	95.0169	114.016	70.1422	57.8336	55.7576	92.7832	85.7619	16.7282	19.5054
48	100.824	96.385	97.8625	94.5922	94.2639	89.314	87.495	62.116	65.0388	96.8178	101.321	99.2686	97.4532	116.939	71.9407	59.3165	57.1872	95.1623	87.961	17.1572	19.5054
49.2	103.345	98.7947	100.309	96.957	96.6205	91.5469	89.6824	63.6689	66.6647	99.2382	103.854	101.75	99.8896	119.863	73.7392	60.7994	58.6169	97.5413	90.16	17.5861	19.5054
50.4	105.865	101.204	102.756	99.3218	98.9771	93.7797	91.8698	65.2218	68.2907	101.659	106.387	104.232	102.326	122.786	75.5377	62.2823	60.0466	99.9204	92.359	18.015	19.5054
51.6	108.386	103.614	105.202	101.687	101.334	96.0126	94.0572	66.7747	69.9167	104.079	108.92	106.714	104.762	125.71	77.3362	63.7653	61.4763	102.299	94.558	18.444	19.5054
52.8	110.907	106.024	107.649	104.051	103.69	98.2454	96.2445	68.3276	71.5427	106.5	111.453	109.195	107.199	128.633	79.1347	65.2482	62.906	104.678	96.7571	18.8729	19.5054
54	113.427	108.433	110.095	106.416	106.047	100.478	98.4319	69.8805	73.1686	108.92	113.986	111.677	109.635	131.557	80.9333	66.7311	64.3357	107.058	98.9561	19.3018	19.5054
55.2	115.948	110.843	112.542	108.781	108.403	102.711	100.619	71.4334	74.7946	111.34	116.519	114.159	112.071	134.48	82.7318	68.214	65.7653	109.437	101.155	19.7307	19.5054
56.4	118.468	113.252	114.988	111.146	110.76	104.944	102.807	72.9863	76.4206	113.761	119.052	116.641	114.508	137.404	84.5303	69.6969	67.195	111.816	103.354	20.1597	19.5054
57.6	120.989	115.662	117.435	113.511	113.117	107.177	104.994	74.5392	78.0465	116.181	121.585	119.122	116.944	140.327	86.3288	71.1798	68.6247	114.195	105.553	20.5886	19.5054
58.8	123.51	118.072	119.882	115.875	115.473	109.41	107.181	76.0921	79.6725	118.602	124.118	121.604	119.38	143.25	88.1273	72.6627	70.0544	116.574	107.752	21.0175	19.5054
60	126.03	120.481	122.328	118.24	117.83	111.643	109.369	77.645	81.2985	121.022	126.651	124.086	121.817	146.174	89.9258	74.1456	71.4841	118.953	109.951	21.4465	19.5054

## Sheet: Higuchi modeling
DDSolver 1.0		Dissolution Data Modeling of Higuchi Model
Time Unit	min			Analyst	fady adel
Model	Higuchi			Date	2\2\2019
Equation	F=kH*t^0.5			Time	14:43:59
Time	No.1	No.2	No.3	No.4	No.5	No.6	No.7	No.8	No.9	No.10	No.11	No.12	No.13	No.14	No.15	No.16	No.17	No.18
(min)	F(%)	F(%)	F(%)	F(%)	F(%)	F(%)	F(%)	F(%)	F(%)	F(%)	F(%)	F(%)	F(%)	F(%)	F(%)	F(%)	F(%)	F(%)	Mean	SD	RSD(%)
5	24.501	23.4	49.17	48.501	16.887	31.324	28.76	10.538	11.781	33.6647	80.561	37.687	35.743	90.23	42.9793	31.4	29.891	42.96	37.221	20.8057	55.8977
10	43.61	41.24	71.23	69.66	42.686	40.73	37.91	18.79	20.781	46.632	81.67	62.281	60.73	95.01	50.2283	33.28	34.307	49.22	49.9997	20.1478	40.2958
15	75.14	70.6	75.478	71.37	52.2899	46.61	44.57	23.49	25.147	61.273	84.34	79.4839	75.92	99.64	49.315	35.612	35.821	55.48	58.9767	21.4593	36.3862
30	93.24	88.34	76.789	71.362	76.218	60.38	56.917	40.89	44.379	80.369	83.19	87.11	84.39	102.51	55.352	44.697	40.57	78.169	70.2707	19.3348	27.5147
45	94.17	89.31	88.31	85.713	89.179	89.7	88.94	55.7	60.196	89.789	85.91	87.83	86.91	101.11	64.1382	55.421	51.88	88.168	80.6875	15.378	19.0588
60	95.34	92.46	94.147	92.346	98.435	94.69	93.843	76.178	77.189	97.697	94.43	94.15	93.178	103.8	71.672	60.617	60.1557	96.303	88.1462	13.0267	14.7785
Time	No.1	No.2	No.3	No.4	No.5	No.6	No.7	No.8	No.9	No.10	No.11	No.12	No.13	No.14	No.15	No.16	No.17	No.18
(min)	F(%)_Pre	F(%)_Pre	F(%)_Pre	F(%)_Pre	F(%)_Pre	F(%)_Pre	F(%)_Pre	F(%)_Pre	F(%)_Pre	F(%)_Pre	F(%)_Pre	F(%)_Pre	F(%)_Pre	F(%)_Pre	F(%)_Pre	F(%)_Pre	F(%)_Pre	F(%)_Pre	Mean	SD	RSD(%)
5	32.0451	30.5641	32.115	30.9838	29.1831	27.7173	26.9967	18.4529	19.4367	30.6183	34.2654	32.3165	31.6165	39.7326	23.5063	18.966	18.2986	30.2498	28.1703	6.09571	21.6388
10	45.3186	43.2241	45.4175	43.8178	41.2712	39.1982	38.179	26.0963	27.4876	43.3008	48.4586	45.7025	44.7125	56.1904	33.2429	26.822	25.8781	42.7797	39.8388	8.62063	21.6388
15	55.5038	52.9385	55.6248	53.6656	50.5467	48.0078	46.7596	31.9613	33.6653	53.0324	59.3495	55.9739	54.7615	68.8189	40.714	32.8501	31.6941	52.3942	48.7923	10.5581	21.6388
30	78.4942	74.8663	78.6653	75.8946	71.4838	67.8933	66.128	45.2001	47.6099	74.9991	83.9328	79.159	77.4444	97.3247	57.5784	46.457	44.8222	74.0966	69.0028	14.9314	21.6388
45	96.1354	91.6922	96.345	92.9515	87.5494	83.152	80.99	55.3586	58.31	91.8548	102.796	96.9496	94.8496	119.198	70.5188	56.898	54.8958	90.7494	84.5108	18.2871	21.6388
60	111.008	105.877	111.25	107.331	101.093	96.0156	93.5192	63.9226	67.3306	106.065	118.699	111.948	109.523	137.638	81.4281	65.7002	63.3882	104.788	97.5847	21.1161	21.6388
Best-fit Values
Parameter	No.1	No.2	No.3	No.4	No.5	No.6	No.7	No.8	No.9	No.10	No.11	No.12	No.13	No.14	No.15	No.16	No.17	No.18	Mean	SD	RSD(%)
kH	14.331	13.6687	14.3623	13.8564	13.0511	12.3956	12.0733	8.25238	8.69234	13.6929	15.324	14.4524	14.1393	17.769	10.5123	8.48185	8.18338	13.5281	12.5981	2.72608	21.6388
Secondary Parameter
Parameter	No.1	No.2	No.3	No.4	No.5	No.6	No.7	No.8	No.9	No.10	No.11	No.12	No.13	No.14	No.15	No.16	No.17	No.18	Mean	SD	RSD(%)
T25	3.04317	3.34525	3.02994	3.25521	3.66932	4.06769	4.28776	9.17745	8.27192	3.33341	2.66157	2.99227	3.12623	1.9795	5.65565	8.68757	9.33286	3.41511	4.62955	2.4561	53.0527
T50	12.1727	13.381	12.1198	13.0208	14.6773	16.2707	17.151	36.7098	33.0877	13.3336	10.6463	11.9691	12.5049	7.918	22.6226	34.7503	37.3314	13.6605	18.5182	9.82439	53.0527
T75	27.3885	30.1072	27.2695	29.2969	33.0239	36.6092	38.5898	82.597	74.4473	30.0007	23.9541	26.9304	28.1361	17.8155	50.9009	78.1881	83.9957	30.736	41.6659	22.1049	53.0527
T80	31.1621	34.2553	31.0266	33.3334	37.5738	41.6531	43.9066	93.9771	84.7045	34.1341	27.2545	30.6408	32.0126	20.2701	57.9139	88.9607	95.5685	34.9708	47.4066	25.1504	53.0527
T90	39.4395	43.3544	39.268	42.1875	47.5544	52.7172	55.5693	118.94	107.204	43.201	34.4939	38.7798	40.516	25.6543	73.2973	112.591	120.954	44.2599	59.9989	31.831	53.0527
Goodness of Fit
Parameter	No.1	No.2	No.3	No.4	No.5	No.6	No.7	No.8	No.9	No.10	No.11	No.12	No.13	No.14	No.15	No.16	No.17	No.18
N_observed	6	6	6	6	6	6	6	6	6	6	6	6	6	6	6	6	6	6
DF	5	5	5	5	5	5	5	5	5	5	5	5	5	5	5	5	5	5
R_obs-pre	0.902503	0.913892	0.924189	0.923238	0.98384	0.983097	0.979006	0.988486	0.993865	0.987124	0.857925	0.888163	0.905736	0.891494	0.976985	0.985727	0.97283	0.994178
Rsqr	0.799669	0.824174	-0.398354	-0.375883	0.960498	0.965749	0.957582	0.885385	0.910105	0.939999	-37.191	0.413991	0.517106	-48.0744	-0.579023	0.68643	0.613664	0.874202
Rsqr_adj	0.799669	0.824174	-0.398354	-0.375883	0.960498	0.965749	0.957582	0.885385	0.910105	0.939999	-37.191	0.413991	0.517106	-48.0744	-0.579023	0.68643	0.613664	0.874202
MSE	182.438	146.884	342.378	317.123	37.6741	23.6784	31.2254	71.3357	57.4666	38.2817	949.096	263.911	219.941	1301.19	176.506	47.0113	52.0173	61.5598
MSE_root	13.5069	12.1196	18.5035	17.8079	6.13792	4.86605	5.58797	8.44604	7.58067	6.18722	30.8074	16.2453	14.8304	36.072	13.2856	6.85648	7.2123	7.84601
Weighting	1	1	1	1	1	1	1	1	1	1	1	1	1	1	1	1	1	1
SS	912.188	734.419	1711.89	1585.61	188.371	118.392	156.127	356.678	287.333	191.408	4745.48	1319.56	1099.71	6505.94	882.53	235.056	260.087	307.799
WSS	912.188	734.419	1711.89	1585.61	188.371	118.392	156.127	356.678	287.333	191.408	4745.48	1319.56	1099.71	6505.94	882.53	235.056	260.087	307.799
AIC	42.8951	41.5945	46.6721	46.2124	33.4305	30.644	32.304	37.261	35.9639	33.5265	52.7897	45.1103	44.0168	54.6828	42.6968	34.759	35.3661	36.3767
MSC	1.27445	1.40493	-0.668629	-0.652429	2.89806	3.04071	2.82685	1.83284	2.07578	2.48006	-3.97593	0.201087	0.394624	-4.22667	-0.79014	0.826399	0.617715	1.73975
Predicted Data
Time	No.1	No.2	No.3	No.4	No.5	No.6	No.7	No.8	No.9	No.10	No.11	No.12	No.13	No.14	No.15	No.16	No.17	No.18
(min)	F(%)_Pre	F(%)_Pre	F(%)_Pre	F(%)_Pre	F(%)_Pre	F(%)_Pre	F(%)_Pre	F(%)_Pre	F(%)_Pre	F(%)_Pre	F(%)_Pre	F(%)_Pre	F(%)_Pre	F(%)_Pre	F(%)_Pre	F(%)_Pre	F(%)_Pre	F(%)_Pre	Mean	SD	RSD(%)
0	0	0	0	0	0	0	0	0	0	0	0	0	0	0	0	0	0	0	0	0
1.2	15.6988	14.9733	15.7331	15.1789	14.2968	13.5787	13.2256	9.04003	9.52198	14.9998	16.7866	15.8318	15.4889	19.4649	11.5157	9.29141	8.96444	14.8193	13.8006	2.98627	21.6388
2.4	22.2015	21.1754	22.2499	21.4662	20.2187	19.2031	18.7038	12.7845	13.4661	21.213	23.7398	22.3896	21.9046	27.5276	16.2856	13.14	12.6776	20.9577	19.5169	4.22323	21.6388
3.6	27.1912	25.9345	27.2505	26.2907	24.7627	23.5189	22.9074	15.6578	16.4926	25.9805	29.0752	27.4215	26.8275	33.7143	19.9457	16.0932	15.5269	25.6678	23.9033	5.17238	21.6388
4.8	31.3977	29.9465	31.4661	30.3578	28.5935	27.1573	26.4512	18.0801	19.044	29.9996	33.5731	31.6636	30.9778	38.9299	23.0313	18.5828	17.9289	29.6386	27.6011	5.97255	21.6388
6	35.1037	33.4812	35.1802	33.9411	31.9685	30.3628	29.5734	20.2141	21.2918	33.5406	37.5359	35.401	34.6342	43.5249	25.7498	20.7762	20.0451	33.137	30.859	6.67751	21.6388
7.2	38.4541	36.6769	38.538	37.1806	35.0198	33.2608	32.396	22.1435	23.324	36.7419	41.1185	38.7799	37.9399	47.6792	28.2075	22.7592	21.9583	36.2998	33.8043	7.31485	21.6388
8.4	41.5352	39.6155	41.6258	40.1597	37.8257	35.9258	34.9917	23.9177	25.1928	39.6858	44.4131	41.887	40.9797	51.4994	30.4676	24.5827	23.7177	39.2082	36.5128	7.90094	21.6388
9.6	44.403	42.3508	44.4998	42.9325	40.4374	38.4063	37.4077	25.5691	26.9322	42.4259	47.4796	44.7791	43.8092	55.0552	32.5712	26.2801	25.3553	41.9153	39.0339	8.44646	21.6388
10.8	47.0965	44.9198	47.1992	45.5368	42.8903	40.736	39.6768	27.1201	28.566	44.9995	50.3597	47.4954	46.4666	58.3948	34.547	27.8742	26.8933	44.4579	41.4017	8.95882	21.6388
12	49.6441	47.3496	49.7523	48	45.2103	42.9395	41.823	28.5871	30.1112	47.4336	53.0838	50.0646	48.9801	61.5535	36.4158	29.382	28.3481	46.8628	43.6412	9.44343	21.6388
13.2	52.0672	49.6607	52.1807	50.3428	47.417	45.0353	43.8644	29.9824	31.5809	49.7488	55.6747	52.5082	51.3708	64.5579	38.1932	30.8161	29.7317	49.1501	45.7713	9.90435	21.6388
14.4	54.3824	51.8689	54.501	52.5813	49.5254	47.0379	45.8148	31.3156	32.9851	51.9609	58.1504	54.843	53.6551	67.4285	39.8915	32.1864	31.0537	51.3356	47.8065	10.3448	21.6388
15.6	56.603	53.9869	56.7264	54.7284	51.5477	48.9586	47.6856	32.5943	34.332	54.0826	60.5248	57.0824	55.846	70.1818	41.5203	33.5006	32.3218	53.4318	49.7586	10.7672	21.6388
16.8	58.7397	56.0248	58.8678	56.7943	53.4936	50.8067	49.4857	33.8247	35.628	56.1242	62.8096	59.2372	57.9541	72.8311	43.0877	34.7653	33.5419	55.4488	51.6369	11.1736	21.6388
18	60.8013	57.9912	60.9339	58.7877	55.3711	52.5899	51.2226	35.0119	36.8785	58.0941	65.0141	61.3163	59.9882	75.3874	44.6	35.9855	34.7191	57.395	53.4493	11.5658	21.6388
19.2	62.7954	59.8931	62.9323	60.7157	57.1871	54.3146	52.9024	36.1601	38.0879	59.9993	67.1463	63.3272	61.9555	77.8597	46.0627	37.1656	35.8578	59.2773	55.2022	11.9451	21.6388
20.4	64.728	61.7364	64.8691	62.5843	58.9471	55.9863	54.5306	37.273	39.2601	61.8459	69.2128	65.2762	63.8623	80.256	47.4803	38.3094	36.9613	61.1016	56.9011	12.3127	21.6388
21.6	66.6045	63.5262	66.7498	64.3987	60.656	57.6094	56.1115	38.3536	40.3984	63.6389	71.2194	67.1687	65.7138	82.5827	48.8569	39.4201	38.0329	62.873	58.5508	12.6697	21.6388
22.8	68.4297	65.267	68.5789	66.1634	62.3182	59.188	57.6491	39.4046	41.5054	65.3827	73.1709	69.0093	67.5145	84.8457	50.1956	40.5003	39.0751	64.5959	60.1552	13.0169	21.6388
24	70.2073	66.9625	70.3604	67.8822	63.9371	60.7256	59.1467	40.4282	42.5836	67.0813	75.0718	70.802	69.2684	87.0498	51.4996	41.5524	40.0902	66.274	61.718	13.355	21.6388
25.2	71.9411	68.6161	72.098	69.5586	65.516	62.2252	60.6073	41.4266	43.6352	68.7378	76.9257	72.5505	70.979	89.1995	52.7714	42.5786	41.0802	67.9106	63.2421	13.6848	21.6388
26.4	73.6341	70.2308	73.7946	71.1955	67.0578	63.6896	62.0336	42.4015	44.6621	70.3554	78.736	74.2578	72.6493	91.2986	54.0133	43.5806	42.047	69.5087	64.7303	14.0069	21.6388
27.6	75.289	71.8093	75.4532	72.7956	68.5649	65.121	63.4278	43.3544	45.6658	71.9366	80.5055	75.9267	74.2821	93.3506	55.2272	44.56	42.992	71.0709	66.1851	14.3217	21.6388
28.8	76.9083	73.3537	77.076	74.3612	70.0396	66.5216	64.792	44.2869	46.648	73.4838	82.237	77.5597	75.8797	95.3583	56.415	45.5184	43.9166	72.5995	67.6086	14.6297	21.6388
30	78.4942	74.8663	78.6653	75.8946	71.4838	67.8933	66.128	45.2001	47.6099	74.9991	83.9328	79.159	77.4444	97.3247	57.5784	46.457	44.8222	74.0966	69.0028	14.9314	21.6388
31.2	80.0487	76.349	80.2232	77.3976	72.8995	69.2379	67.4376	46.0953	48.5528	76.4844	85.595	80.7267	78.9781	99.2521	58.7186	47.3771	45.7099	75.564	70.3693	15.2271	21.6388
32.4	81.5736	77.8034	81.7514	78.872	74.2882	70.5568	68.7223	46.9734	49.4777	77.9414	87.2255	82.2645	80.4826	101.143	59.8372	48.2796	46.5806	77.0034	71.7098	15.5171	21.6388
33.6	83.0705	79.2311	83.2516	80.3193	75.6514	71.8515	69.9833	47.8353	50.3856	79.3716	88.8261	83.7741	81.9595	102.999	60.9352	49.1655	47.4354	78.4164	73.0257	15.8019	21.6388
34.8	84.5408	80.6335	84.7252	81.741	76.9904	73.1233	71.2221	48.682	51.2775	80.7765	90.3984	85.2569	83.4102	104.822	62.0138	50.0358	48.275	79.8044	74.3183	16.0816	21.6388
36	85.9861	82.012	86.1736	83.1384	78.3066	74.3734	72.4396	49.5143	52.1541	82.1574	91.9438	86.7144	84.8361	106.614	63.0739	50.8911	49.1003	81.1687	75.5888	16.3565	21.6388
37.2	87.4074	83.3676	87.598	84.5127	79.601	75.6028	73.6371	50.3327	53.0162	83.5155	93.4636	88.1478	86.2384	108.376	64.1165	51.7324	49.9119	82.5104	76.8382	16.6269	21.6388
38.4	88.806	84.7016	88.9997	85.865	80.8747	76.8125	74.8153	51.1381	53.8645	84.8518	94.9591	89.5582	87.6183	110.11	65.1425	52.5601	50.7105	83.8307	78.0677	16.8929	21.6388
39.6	90.183	86.0149	90.3796	87.1963	82.1287	78.0035	75.9753	51.931	54.6996	86.1674	96.4315	90.9468	88.9768	111.818	66.1525	53.3751	51.4968	85.1305	79.2782	17.1548	21.6388
40.8	91.5392	87.3084	91.7388	88.5076	83.3637	79.1765	77.1179	52.712	55.5222	87.4632	97.8816	92.3145	90.3149	113.499	67.1473	54.1777	52.2712	86.4107	80.4704	17.4128	21.6388
42	92.8756	88.583	93.0781	89.7997	84.5808	80.3324	78.2437	53.4815	56.3328	88.7402	99.3106	93.6622	91.6335	115.156	68.1276	54.9687	53.0344	87.6722	81.6452	17.667	21.6388
43.2	94.193	89.8396	94.3984	91.0735	85.7806	81.472	79.3536	54.2402	57.1319	89.9989	100.719	94.9909	92.9333	116.79	69.094	55.7484	53.7867	88.9159	82.8033	17.9176	21.6388
44.4	95.4923	91.0788	95.7005	92.3298	86.9638	82.5958	80.4482	54.9883	57.92	91.2404	102.109	96.3011	94.2152	118.401	70.0471	56.5174	54.5286	90.1424	83.9455	18.1648	21.6388
45.6	96.7741	92.3014	96.9852	93.5692	88.1312	83.7045	81.5281	55.7265	58.6975	92.4651	103.479	97.5938	95.4799	119.99	70.9874	57.2761	55.2605	91.3524	85.0723	18.4086	21.6388
46.8	98.0392	93.508	98.253	94.7923	89.2833	84.7987	82.5939	56.4549	59.4648	93.6739	104.832	98.8696	96.728	121.558	71.9153	58.0248	55.9829	92.5466	86.1844	18.6493	21.6388
48	99.2882	94.6993	99.5047	95.9999	90.4207	85.879	83.6461	57.1741	60.2223	94.8672	106.168	100.129	97.9603	123.107	72.8315	58.764	56.6961	93.7256	87.2824	18.8869	21.6388
49.2	100.522	95.8757	100.741	97.1925	91.544	86.9459	84.6852	57.8844	60.9705	96.0457	107.486	101.373	99.1772	124.636	73.7363	59.494	57.4004	94.8899	88.3667	19.1215	21.6388
50.4	101.74	97.0379	101.962	98.3707	92.6536	87.9998	85.7117	58.5861	61.7095	97.21	108.789	102.602	100.379	126.147	74.6301	60.2152	58.0962	96.0401	89.4378	19.3533	21.6388
51.6	102.944	98.1863	103.169	99.5349	93.7502	89.0412	86.7261	59.2794	62.4398	98.3604	110.077	103.816	101.567	127.64	75.5133	60.9278	58.7838	97.1767	90.4963	19.5823	21.6388
52.8	104.134	99.3214	104.361	100.686	94.834	90.0707	87.7287	59.9647	63.1617	99.4976	111.349	105.016	102.742	129.116	76.3863	61.6322	59.4634	98.3002	91.5425	19.8087	21.6388
54	105.311	100.444	105.541	101.823	95.9056	91.0884	88.7201	60.6423	63.8754	100.622	112.608	106.203	103.903	130.575	77.2495	62.3286	60.1353	99.411	92.5769	20.0325	21.6388
55.2	106.475	101.554	106.707	102.948	96.9654	92.095	89.7004	61.3124	64.5812	101.734	113.852	107.377	105.051	132.018	78.1031	63.0174	60.7998	100.509	93.5999	20.2539	21.6388
56.4	107.626	102.652	107.86	104.061	98.0137	93.0906	90.6702	61.9753	65.2794	102.834	115.083	108.537	106.186	133.445	78.9475	63.6987	61.4571	101.596	94.6118	20.4729	21.6388
57.6	108.765	103.738	109.002	105.163	99.0509	94.0757	91.6297	62.6311	65.9702	103.922	116.301	109.686	107.31	134.857	79.7829	64.3728	62.1075	102.671	95.613	20.6895	21.6388
58.8	109.892	104.813	110.131	106.252	100.077	95.0506	92.5792	63.2802	66.6539	104.999	117.506	110.823	108.422	136.255	80.6097	65.0398	62.7511	103.735	96.6039	20.9039	21.6388
60	111.008	105.877	111.25	107.331	101.093	96.0156	93.5192	63.9226	67.3306	106.065	118.699	111.948	109.523	137.638	81.4281	65.7002	63.3882	104.788	97.5847	21.1161	21.6388
