# Supplementary material for: Preparation of solid dispersion systems for enhanced dissolution of poorly water soluble diacerein: In-vitro evaluation, optimization and physiologically based pharmacokinetic modeling
Source: PLoS One. 2021 Jan 20;16(1):e0245482. doi: 10.1371/journal.pone.0245482 (PMC7816977; doi:10.1371/journal.pone.0245482)
Supplement: S6 File — (XLSX) [file pone.0245482.s006.xlsx]

## Sheet: Summary
Simcyp Population Based Simulator
2020-07-01 12:37:52
Simcyp Version 17 (27/11/2017)
Input Parameters
Output Parameters
Input Parameters
Workspace	<no workspace loaded>
Substrate	dia
Simulation Mode	PKPD Parameters + PKPD Profiles
ADAM LUA Scripting	Off
	Substrate				Substrate
Compound Name	dia			Absorption Model	ADAM
Mol Weight (g/mol)	368.29			Permeability Assay	n/a
log P	2.14			Peff,man	Regional
Compound Type	Monoprotic Acid
pKa 1	3.37			Distribution Model	Minimal PBPK Model
pKa 2	n/a			Vss	Predicted
B/P – baseline value	0.603723			Prediction Method	Method 2
Haematocrit	45
fu	0.01			Clearance Type	In Vivo Clearance
Trial Design
					Substrate
Population Name	Sim-Healthy Volunteers			Prandial State	Fasted
Use Pop Representative	No			Route	Oral
Population Size	10			Dose Units	Dose (mg)
Number of Trials	1			Dose	50
No. of Subjects per Trial	10			Start Day/Time	Day 1, 09:00
Start Day/Time	Day 1, 09:00			Dosing Regimen	Single Dose
End Day/Time	Day 2, 09:00
Study Duration (h)	24
Sampling Time	Pre-defined Uniform
Sampling Site Selection	Off
Output Parameters
PKPD Parameters	Mean	Median	Geometric mean	Confidence Interval		Can be found in Excel sheet
CL (L/h)	0	0	n/a	n/a	n/a	Clearance Trials SS
CLpo (L/h)	1.64072	1.51305	1.58814	1.30902	1.92677	Clearance Trials SS
fa (Sub)	0.979203	0.989439	0.979009	0.964424	0.993815	Clearance Trials SS
Fg (Sub)	1	1	1	1	1	Clearance Trials SS
Fh (Sub)	1	1	1	1	1	Clearance Trials SS
F (Sub)	0.979203	0.989439	0.979009	0.964424	0.993815	Clearance Trials SS
Vss (Subs)(L/Kg)	0.0913066	0.0937851	0.0906509	0.0827071	0.0993577	Distribution - Vols
PKPD Profiles	Mean	Median	Geometric mean	Confidence Interval		Can be found in Excel sheet
CMax (mg/L)	2.60592	2.54213	2.54499	2.15951	2.99928	AUC0(Sub)(CPlasma)
TMax (h)	1.95019	1.85471	1.92945	1.7282	2.15414	AUC0(Sub)(CPlasma)
AUC (mg/L.h)	15.4845	14.416	14.8966	12.1039	18.3335	AUC0(Sub)(CPlasma)
fa (Subs)	0.46998	0.475476	0.467248	0.430645	0.506961	Overall Fa Fg
Fg (Subs)	1	1	1	1	1	Overall Fa Fg
CL (Dose/AUC)(L/h)	3.48185	3.46971	3.35648	2.72724	4.13089	AUC0(Sub)(CPlasma)
ADAM / M-ADAM	Precipitation					Can be found in Excel sheet
Substrate	No					ADAM Profiles (Sub)

## Sheet: Input Sheet
Simcyp Population Based Simulator
2020-07-01 12:37:52
Simcyp Version 17 (27/11/2017)
Substrate			Trial Design			Software Version Detail
Compound Name	dia		Use Pop Representative	No		Simulation Duration(seconds)	2
Version number	Not applicable		Population Size	10		Windows Version	Windows 10
Molecule Type	Small Molecule		Number of Trials	1		Excel Version	Excel 2013
Route	Oral		No of Subjects per Trial	10		Source File Location	C:\Program Files\Simcyp\Simcyp Simulator V17\Screens\
Dose Units	Dose (mg)		Population name	Sim-Healthy Volunteers		Excel Embedded Workspace	Yes
Dose	50		Version number	17.0.0		Simcyp.exe
Start Day	1		Minimum Age (years)	20		File Version	17.0.90.0
Start Time	9h0m		Maximum Age (years)	60		Date Modified	27/11/2017
Dosing Regimen	Single Dose		Propn. of Females	0.5		File Size (bytes)	3236864
			Fix Individual Trial Design	No		Simcyp.UI.Common.dll
PhysChem and Blood Binding			Prandial State	Fasted		File Version	15.0.0.0
			Fluid intake with dose (mL)	250		Date Modified	27/11/2017
Mol Weight (g/mol)	368.29		Fluid intake with dose CV (%)	30		File Size (bytes)	1980416
log P	2.14		PKPD Parameters	On		Simcyp.ViewModel.Animal.dll
Compound Type	Monoprotic Acid		PKPD Profiles	On		File Version	15.0.0.0
pKa 1	3.37		Start Day/Time	Day 1, 09:00		Date Modified	27/11/2017
BP Input	Semi-Mechanistic binding		End Day/Time	Day 2, 09:00		File Size (bytes)	102912
Bmax	0		Study Duration (h)	24		Simcyp.ViewModel.Common.dll
KD (µM)	1000000					File Version	17.0.90.0
Haematocrit	45		Sub : Route	Oral		Date Modified	27/11/2017
fu Input	User		Place of application	Forehead		File Size (bytes)	510976
fu	0.01		Thickness of Applied Layer (cm)	0.005		simcyp.ViewModel.dll
Reference Binding Component	HSA		Area of application (cm²)	100		File Version	17.0.90.0
Protein Reference Conc (g/L)	45					Date Modified	27/11/2017
% Bound to Lipoprotein	0		Random Generator	Mersenne Twister (MT19937)		File Size (bytes)	605696
% Bound to Lipoprotein (CV %)	0		Seed	Fixed		simcyp.model.XmlSerializers.dll
			Seed Value	1		File Version	15.0.6540.37905
Absorption						Date Modified	27/11/2017
			Solver sampling interval (h)	0.05		File Size (bytes)	4730880
Absorption Model	ADAM		Sampling Time	Pre-defined Uniform		simcyp.model.dll
Input type	Predicted		Number of time samples	200		File Version	17.0.90.0
fa	0.992205					Date Modified	27/11/2017
ka (1/h)	2.09791		Sampling Site Selection	Off		File Size (bytes)	5249024
fu(Gut) input type	User
fu(Gut)	1		AUC Calculations (Substrate)			Licence Details
Peff,man Type	Global		Calculated AUCt first dose	No
Peff,man (10-4 cm/s)	4.80452		Calculated AUC_INF	No		User name	FUE\amohsen
Permeability Assay	LLC-PK1		Calculated AUCt last dose	No		Domain name	fue.edu.eg
Value	50		Integrated AUCt first dose	Yes		Computer name	PH-E45-06
Reference Compound	Propranolol		Integrated AUCt last dose	No		Simcyp Standard licence: agreement identifier
Reference Compound Value (10E-06 cm/s)	36		Integrated AUCt user interval	No		Simcyp Standard licence: agreement type	Academic research
Scalar	1		Method	Linear Trapezoidal		Simcyp Standard licence: organisation	Future University in Egypt
Degradation Rate Stomach (1/h)	0					Simcyp Standard licence: machine identifier	4C4C4544-0035-3110-8048-B7C04F4B3532
Degradation Rate Duodenum (1/h)	0		Memory Size	4000000		Simcyp Standard licence: source	Desktop
Degradation Rate Jejunum I (1/h)	0		Solubility Cap (mg/mL)	500		Simcyp Standard licence: usage	Client
Degradation Rate Jejunum II (1/h)	0		Differential Solver	5th-order Runge-Kutta		Simcyp Standard licence: issued	Wed Jan 15 16:35:29 2020
Degradation Rate Ileum I (1/h)	0		Maximum number of steps	1000000		Simcyp Standard licence: valid from	Tue Jan 14 22:00:00 2020
Degradation Rate Ileum II (1/h)	0		Relative Tolerance	1e-15		Simcyp Standard licence: valid to	Thu Jan 14 21:59:59 2021
Degradation Rate Ileum III (1/h)	0		Relative Tolerance when ADAM is used	1e-09
Degradation Rate Ileum IV (1/h)	0		Integration error tolerance	0.001
Degradation Rate Colon (1/h)	0
Input Form	Solid Formulation		Use UBL fluid volumes	Off
Formulation	Immediate Release (IR)		Apply Minimum Mass Limit(ADAM)	Off
Define Disintegration Profile	Not activated		Minimum Mass Limit	n/a
Dissolution Type	Dissolution		Minimum Norm. Scalar (pH surface model)	1e-11
Dissolution Input	Discrete		Newton Convergence Tol (pH surface model)	1e-14
Interpolation Approach	Linear		Time Interval (pH surface model)	0.01
Dissolution Profile (All)
Fasted Time (h) 1	0		LUA Scripting(ADAM)	Off
Fasted Dissolution (%) 1	0
Fasted CV (%) 1	0		Paediatric Module	Not Loaded
Fasted Time (h) 2	0.25		No. Differential Equations	98
Fasted Dissolution (%) 2	13.27
Fasted CV (%) 2	10
Fasted Time (h) 3	0.5
Fasted Dissolution (%) 3	32.9
Fasted CV (%) 3	10
Fasted Time (h) 4	0.75
Fasted Dissolution (%) 4	42.3
Fasted CV (%) 4	10
Fasted Time (h) 5	1
Fasted Dissolution (%) 5	48.3
Fasted CV (%) 5	10
Absorption Scalars (no units)	SI Global
Absorption Scalar SI Global	1
Absorption Scalar Colon	1
Segregated transit time model	Not activated
Distribution
Distribution Model	Minimal PBPK Model
SAC kin (1/h)	0
SAC kout (1/h)	0
SAC CLin (L/h)	1e-05
SAC CLout (L/h)	1e-05
Volume [Vsac] (L/kg)	1e-05
Vss input type	Predicted
Vss (L/kg)	0.093027
Prediction Method	Method 2 (Rodgers et al)
Concentration-dependent volume	No
log Po:w	2.14
logP vo:w input type	Predicted
logP vo:w Prediction Method	Hansch
logP vo:w Hansch a	1.115
logP vo:w Hansch b	-1.35
logP vo:w	1.0361
Compound Type	Monoprotic Acid
pKa 1	3.37
Adipose input type	Predicted
Adipose	0.0382033
Bone input type	Predicted
Bone	0.101347
Brain input type	Predicted
Brain	0.0511483
Gut input type	Predicted
Gut	0.160893
Heart input type	Predicted
Heart	0.160334
Kidney input type	Predicted
Kidney	0.133524
Liver input type	Predicted
Liver	0.0891287
Lung input type	Predicted
Lung	0.215204
Muscle input type	Predicted
Muscle	0.037237
Skin input type	Predicted
Skin	0.280841
Spleen input type	Predicted
Spleen	0.100419
Pancreas input type	Predicted
Pancreas	0.0632494
Kp Scalar	1
Smoothing Function	Off
Lipid Binding Scalar	1
Use Pvo:w for Neutral Lipid Partition in All Tissues	No
Elimination
Clearance Type	In Vivo Clearance
CL (po) (L/h)	1.5
CV CL (po) (%)	30
Active Uptake into Hepatocyte	1
CL R (L/h)	0
Transport
Active transport Papp-to-Peff correlation	Predicted
Active transport Papp-to-Peff correlation Slope	0.939
Active transport Papp-to-Peff correlation Intercept	-0.8787
Assume Colon SS	No

## Sheet: Ode State Info
Index	Model	State variable name (no PK interaction)
0	0	Substrate amount in absorption compartment
1	0	Substrate liver concentration
2	0	Substrate systemic concentration
3	0	Substrate kidney concentration
4	0	Substrate renal amount excreted
5	0	Substrate SAC concentration
6	0	CYP2C9 amount in gut
7	0	CYP2C9 amount in colon
8	0	CYP2C9 amount in liver
9	0	CYP2C9 amount in kidney
10	0	CYP3A4 amount in gut
11	0	CYP3A4 amount in colon
12	0	CYP3A4 amount in liver
13	0	CYP3A4 amount in kidney
14	0	Substrate secreted from gall bladder amount
15	0	Substrate gall bladder amount
16	0	CYP2C9 amount in Stomach
17	0	CYP2C9 amount in Duodenum
18	0	CYP2C9 amount in Jejunum I
19	0	CYP2C9 amount in Jejunum II
20	0	CYP2C9 amount in Ileum I
21	0	CYP2C9 amount in Ileum II
22	0	CYP2C9 amount in Ileum III
23	0	CYP2C9 amount in Ileum IV
24	0	CYP2C9 amount in Colon
25	0	CYP3A4 amount in Stomach
26	0	CYP3A4 amount in Duodenum
27	0	CYP3A4 amount in Jejunum I
28	0	CYP3A4 amount in Jejunum II
29	0	CYP3A4 amount in Ileum I
30	0	CYP3A4 amount in Ileum II
31	0	CYP3A4 amount in Ileum III
32	0	CYP3A4 amount in Ileum IV
33	0	CYP3A4 amount in Colon
34	0	Water volume in Stomach
35	0	Water volume in Duodenum
36	0	Water volume in Jejunum I
37	0	Water volume in Jejunum II
38	0	Water volume in Ileum I
39	0	Water volume in Ileum II
40	0	Water volume in Ileum III
41	0	Water volume in Ileum IV
42	0	Water volume in Colon
43	0	Sub solid amount in faeces
44	0	Sub dissolved amount in faeces
45	0	Sub unreleased amount in faeces
46	0	Sub solid amount in Stomach bin 0
47	0	Sub solid amount in Duodenum bin 0
48	0	Sub solid amount in Jejunum I bin 0
49	0	Sub solid amount in Jejunum II bin 0
50	0	Sub solid amount in Ileum I bin 0
51	0	Sub solid amount in Ileum II bin 0
52	0	Sub solid amount in Ileum III bin 0
53	0	Sub solid amount in Ileum IV bin 0
54	0	Sub solid amount in Colon bin 0
55	0	Sub dissolved amount in Stomach bin 0
56	0	Sub dissolved amount in Duodenum bin 0
57	0	Sub dissolved amount in Jejunum I bin 0
58	0	Sub dissolved amount in Jejunum II bin 0
59	0	Sub dissolved amount in Ileum I bin 0
60	0	Sub dissolved amount in Ileum II bin 0
61	0	Sub dissolved amount in Ileum III bin 0
62	0	Sub dissolved amount in Ileum IV bin 0
63	0	Sub dissolved amount in Colon bin 0
64	0	Sub concentration in enterocytic compartment Duodenum
65	0	Sub concentration in enterocytic compartment Jejunum I
66	0	Sub concentration in enterocytic compartment Jejunum II
67	0	Sub concentration in enterocytic compartment Ileum I
68	0	Sub concentration in enterocytic compartment Ileum II
69	0	Sub concentration in enterocytic compartment Ileum III
70	0	Sub concentration in enterocytic compartment Ileum IV
71	0	Sub concentration in enterocytic compartment Colon
72	0	Sub metabolite amount in enterocytic compartment Duodenum
73	0	Sub metabolite amount in enterocytic compartment Jejunum I
74	0	Sub metabolite amount in enterocytic compartment Jejunum II
75	0	Sub metabolite amount in enterocytic compartment Ileum I
76	0	Sub metabolite amount in enterocytic compartment Ileum II
77	0	Sub metabolite amount in enterocytic compartment Ileum III
78	0	Sub metabolite amount in enterocytic compartment Ileum IV
79	0	Sub metabolite amount in enterocytic compartment Colon
80	0	Sub amount absorbed through Duodenum
81	0	Sub amount absorbed through Jejunum I
82	0	Sub amount absorbed through Jejunum II
83	0	Sub amount absorbed through Ileum I
84	0	Sub amount absorbed through Ileum II
85	0	Sub amount absorbed through Ileum III
86	0	Sub amount absorbed through Ileum IV
87	0	Sub amount absorbed through Colon
88	0	Sub cumulative amount through enterocyte Duodenum
89	0	Sub cumulative amount through enterocyte Jejunum I
90	0	Sub cumulative amount through enterocyte Jejunum II
91	0	Sub cumulative amount through enterocyte Ileum I
92	0	Sub cumulative amount through enterocyte Ileum II
93	0	Sub cumulative amount through enterocyte Ileum III
94	0	Sub cumulative amount through enterocyte Ileum IV
95	0	Sub cumulative amount through enterocyte Colon
96	0	Sub total dissolved amount in ADAM compartments
97	0	Cumulative amount leaving the enterocyte to enter the portal vein

## Sheet: Sim-Healthy Volunteers
	Population		Population : Liver		Population : Kidney		Population : Skin		Population : GI Tract		Population : Lung		Population : Tissue Composition		Population : Blood		Population : Tissue Blood Flow Rates		Population : Brain		Population : Additional Organ		Population : FcRn IgG		Population : Lymph		Population : Target
	Ref Bodyweight (kg)	80.7056	Liver model	Well Stirred	Male Baseline 1	76.5	MechDermA - Forearm		Dep of Duod. on BSA:C1 Len	0.205	Ventillation-perfusion ratio: Mean	1	Adipose : EW (%)	14.1	Haematocrit Mean : Male	43	Adipose : Male (% of Qc)	5	CSF Flow		Additional Organ : EW (%)	14.1	IgG Concentration (µM)	80.7	% of total lymph flow (Adipose)	12.8	Target1 Name	TNF-alpha
	Maximum Age (years)	65	Liver weight : Slope vs BSA	0.722	Male Baseline 1 CV (%)	16.1	SCorneum Thickness (µm) : Male	15.7	Dep of Duod. on BSA:Exp Len	0.55	Ventillation-perfusion ratio: CV (%)	35	Adipose : NL (%)	79	Haematocrit CV (%) : Male	6.5	Adipose : Female (% of Qc)	8.5	CSF production rate (L/h)	0.021	Additional Organ : IW (%)	3.9	IgG Concentration CV (%)	12.6	% of total lymph flow (Bone)	0	Target1 Rmax (µM)	4.42e-06
	Minimum Age (years)	18	Operational Concentrations	Liver Compartment (Outlet)	Male Age Cut-Off	61	SCorneum Thickness CV (%) : Male	33	Dep of Duod. on BSA:C1 Dia	0.033	Volume Airway (L): Mean	0.1	Adipose : NP (%)	0.2	Haematocrit Mean : Female	38	Bone : Male (% of Qc)	5	CSF production rate CV (%)	10	Additional Organ : NL (%)	79	IgG KD (µM)	0.728	% of total lymph flow (Brain)	1.05	Target1 Rmax CV (%)	30
	Propn of Females	0.34	Liver weight : Intcpt vs BSA	1.176	Male Age Cut-off Baseline	81.2	SCorneum Thickness (µm) : Female	15.7	Dep of Duod. on BSA:Exp Dia	0.383	Volume Airway (L): CV (%)	30	Bone : EW (%)	9.8	Haematocrit CV (%) : Female	7.1	Bone : Female (% of Qc)	5	Bulk flow from brain to CSF (% CSF production)	25	Additional Organ : NP (%)	0.2	IgG KD CV (%)	10	% of total lymph flow (Stomach and Oesophagus)	12	Target1 Kdeg (1/h)	0.877
	BSA C1 Param	0.007184	Liver Volume CV (%)	12	Male Age Cut-Off CV1 (%)	27.4	SCorneum Thickness CV (%) : Female	34	Jej-Ileum Ratio:Jej Len	0.4	Volume Alveoli (L): Mean	5.6	Bone : NL (%)	7.4	AGP Mean : Male	0.811	Brain : Male (% of Qc)	12	Bulk flow from brain to CSF (% CSF production) CV (%)	8	Additional Organ : AP (mg/g)	0.4	IgG KDcomplex (µM)	2.912	% of total lymph flow (Heart)	1	Target1 Kdeg CV (%)	30
	BSA Wt Exp	0.425	Liver Density	1080	Male Age Cut-Off CV2 (%)	21.2	SCorneum Fat (%) : Male	12.9	Enterocyte Volume (L)	0.517	Volume Alveoli (L): CV (%)	10	Bone : NP (%)	0.11	AGP CV (%) : Male	15	Brain : Female (% of Qc)	12	CSF spinal absorption rate (%)	38	Additional Organ : KpALB	0.037	IgG KDcomplex CV (%)	30	% of total lymph flow (Kidney)	8.5	Target1 Kshed (1/hr)	0
	BSA Ht Exp	0.725	MPPGL : Baseline	1.407	Female Baseline 1	57	SCorneum Fat CV (%) : Male	30	Jej-Ileum Ratio:Jej/Duo Dia C1	0.8125	Volume Pulmonary Capilliary Blood (L): Mean	0.089	Brain : EW (%)	9.2	AGP Mean : Female	0.791	Pancreas : Male (% of Qc)	1	CSF spinal absorption rate CV (%)	30	Additional Organ : KpLPP	0.068	IgG CLcat,free (L/h)	0.0175	% of total lymph flow (Liver)	33	Target1 Kshed CV (%)	30
	HT & WT option	Values	MPPGL : C1	0.01579	Female Baseline CV (%)	20.4	SCorneum Fat (%) : Female	12.9	Jej-Ileum Ratio:Il/Duo Dia C1	0.725	Volume Pulmonary Capilliary Blood (L): CV (%)	20	Brain : NL (%)	5.1	AGP CV (%) : Female	13	Pancreas : Female (% of Qc)	1	Bulk flow from spinal CSF to cranial CSF (% CSF spinal absorption rate)	90	Additional Organ : membrane potential : (mV)	-41	IgG CLcat,free CV (%)	10	% of total lymph flow (Lung)	3	Target1 Lambda (1/h)	0
	Male Body Weight C0	2.643	MPPGL : C2	-0.0003824	Female Age Cut-Off 1	48	SCorneum Fat CV (%) : Female	30	Dep of LG on BSA :C1	5.231	Volume Epithelial Lining Fluid (L): Mean	0.025	Brain : NP (%)	5.65	HSA C0 : Male	50.34	Stomach : Male (% of Qc)	1	Bulk flow from spinal CSF to cranial CSF (% CSF spinal absorption rate) CV (%)	100	Additional Organ : subcell membrane potential (mV)	10	Ontogeny Profile	No Profile Used	% of total lymph flow (Muscle)	16	Target2 Name	IgE
	Male Body Weight C1	0.0099	MPPGL : C3	2.37e-06	Female Age Cut-Off Baseline 2	66.2	VEpidermis Thickness (µm) : Male	50.7	Dep of LG on BSA :Exp	0.414	Volume Epithelial Lining Fluid(L): CV (%)	20	Gut : EW (%)	26.7	HSA C1 : Male	-0.0575	Stomach : Female (% of Qc)	1	CSF Volume		Additional Organ : subcell pH	5	FcRn Concentration (µM)	40	% of total lymph flow (Pancreas)	0.3	Target2 Rmax (µM)	0.00225
	Male Body Weight CV (%)	15	MPPGL : CV (%)	26.9	Female Age Cut-off 1 CV 1 (%)	26.5	VEpidermis Thickness CV (%) : Male	24	Dep of LG on BSA :CV LG Len	20	Surface Area Airway (m2): Mean	1.5	Gut : NL (%)	4.87	HSA C2 : Male	-0.0738	SI : Male (% of Qc)	10	CSF (% Brain volume) : Male	10.5	Additional Organ : IW pH	7	FcRn Coefficient	0.95	% of total lymph flow (Skin)	7.3	Target2 Rmax CV (%)	30
	Male Height C0	175.32	CPPGL : Baseline	28.8945	Female Age Cut-off 1 CV 2 (%)	22.8	VEpidermis Thickness (µm) : Female	53.8	S9PPI : input type	Predicted	Surface Area Airway (m2): CV (%)	50	Gut : NP (%)	1.63	HSA CV (%) : Male	10	SI : Female (% of Qc)	11	CSF (% Brain volume) : Female	9.2	Additional Organ Local pH : EW	7.4	Additional Clearance (L/h)	0.0017	% of total lymph flow (Spleen)	1	Target2 Kdeg (1/h)	0.012
	Male Height C1	0.1113	CPPGL : Correlation Coefficient	1.31032	Female Age Cut-Off 2	78	VEpidermis Thickness CV (%) : Female	19	S9PPI : Mean	5320	Surface Area Alveoli (m2): Mean	140	Heart : EW (%)	31.3	HSA C0 : Female	49.38	Villi : Male (% of Qc)	6	Spinal (% CSF) : Male	20	Additional Organ Local pH : IW	7	Additional Clearance CV (%)	10	% of total lymph flow (Additional Organ)	0	Target2 Kdeg CV (%)	30
	Male Height C2	-0.0025	CPPGL : CV (%)	21.467	Female Age Cut-Off Baseline 3	79.5	VEpidermis Fat (%) : Male	3	MPPI : Mean	2978	Surface Area Alveoli (m2): CV (%)	30	Heart : NL (%)	1.15	HSA C1 : Female	-0.037	Villi : Female (% of Qc)	6	Spinal (% CSF) : Female	20	Additional Organ : subcell fraction (%)	0	Lymphatic Clearance (L/h)	0	Lymph flow rate (L/h/kg)	0.00385518	Target2 Kshed (1/hr)	0
	Male Height CV (%)	3.9	HPGL : Baseline	3.103	Female Age Cut-Off 2 CV 1 (%)	38.3	VEpidermis Fat CV (%) : Male	30	MPPI : CV (%)	30	Lobe Distribution Percentage (%) Ventillation Rate RL	25.9	Heart : NP (%)	1.66	HSA C2 : Female	-0.1286	LI : Male (% of Qc)	4	Intracranial blood volume (% Brain Volume) : Male	5	Additional Organ : Male (% of Qc)	0.65	Lymphatic Clearance CV (%)	10	Lymph volume (L/kg)	0.00386	Target2 Kshed CV (%)	30
	Female Body Weight C0	2.7383	HPGL : Age Coefficient	-0.655	Female Age Cut-Off 2 CV 2 (%)	31.6	VEpidermis Fat (%) : Female	3	CPPI : Mean	2342	Lobe Distribution Percentage (%) Ventillation Rate RL	12.4	Kidney : EW (%)	28.3	HSA CV (%) : Female	10	LI : Female (% of Qc)	5	Intracranial blood volume (% Brain Volume) : Female	5	Additional Organ : Female (% of Qc)	0.65	Vendothelial (fraction of tissuevolume)	0.005	Lymph volume CV (%)	30	Target2 Lambda (1/h)	0
	Female Body Weight C1	0.0091	HPGL : CV (%)	41.9	Prediction Method	Method 1	VEpidermis Fat CV (%) : Female	30	CPPI : CV (%)	31	Lobe Distribution Percentage (%) Ventillation Rate RL	14.8	Kidney : NL (%)	2.07	Other Mean : Male	0	Heart : Male (% of Qc)	4	Abundance : ABCB1 (P-gp/MDR1) Mean	1	Additional Organ % of Body Weight	1	σv (Sigmav)	0.76	Total Plasma Protein (g/100ml)	6.85	Target3 Name	CD11a
	Female Body Weight CV (%)	18.8	P450/10e6 Cells : Baseline	3.034	GFR Cap Minimum Defined Population Limit (ml/min/1.73m^2)	90			MPPC : Mean	622	Lobe Distribution Percentage (%) Ventillation Rate RL	32.1	Kidney : NP (%)	1.62	Other CV (%)(%) : Male	0	Heart : Female (% of Qc)	5	Abundance : ABCB1 (P-gp/MDR1) CV (%)	0	Additional Organ % of Body Weight CV (%)	30	σl (Sigmal)	0.2	Total Plasma Protein CV (%)	1.5	Target3 Rmax (µM)	0.01
	Female Height C0	161.66	P450/10e6 Cells : HPGL Coefficient	-0.506	GFR Cap Maximum Defined Population Limit (ml/min/1.73m^2)	400	MechDermA - Upper Arm		MPPC : CV (%)	30	Lobe Distribution Percentage (%) Ventillation Rate RL	14.8	Liver : EW (%)	16.5	Other Mean : Female	0	Kidney : Male (% of Qc)	19	Abundance : ABCC4 (MRP4) Mean	1	Additional Organ Density (g/L)	923	Kup (1/h)	0.0298			Target3 Rmax CV (%)	10
	Female Height C1	0.1319	% Hepatic Bile Entering Gallbladder Mean	70.3	Ref Value for Males 20~30	130	SCorneum Thickness (µm) : Male	11.9	TMePPI : Mean	2737	Lobe Distribution Percentage (%) Ventillation Rate RL	100	Liver : NL (%)	3.48	Other CV (%)(%) : Female	0	Kidney : Female (% of Qc)	17	Abundance : ABCC4 (MRP4) CV (%)	0	Additional Organ Capillary Bed (%)	5	Krc (1/h)	0.548			Target3 Kdeg (1/h)	0.0185
	Female Height C2	-0.0027	% Hepatic Bile Entering Gallbladder CV (%)	32.1	Ref Value for Females 20~30	120	SCorneum Thickness CV (%) : Male	29	TMePPI : CV (%)	66	Lobe Distribution Percentage (%) Ventillation Rate RL	100	Liver : NP (%)	2.52	User-defined Binding Type	User-defined	Liver (Art) : Male (% of Qc)	6.5	Abundance : ABCG2 (BCRP) Mean	1	For neutral (phospho)lipid Partitioning	Using Olive oil-water Partitioning	Krc,complex (1/h)	1.125			Target3 Kdeg CV (%)	10
	Female Height CV (%)	3.9	IMMC Cycle Time Mean (h)	1.55	Age Limit	140	SCorneum Thickness (µm) : Female	13.9	TMePPC : Mean	112	Lobe Distribution Percentage (%) Blood Flow Rate RL	2.5	Lung : EW (%)	34.8	Ontogeny Profile	No Profile Used	Liver (Art) : Female (% of Qc)	6.5	Abundance : ABCG2 (BCRP) CV (%)	0	Additional Organ : Endothelial Volume (%)	0.35625	FR	0.715			Target3 Kshed (1/hr)	0
	Male Distribution	Weibull	IMMC Cycle Time CV (%)	55	Kidney Size Baseline	15.4	SCorneum Thickness CV (%) : Female	28	TMePPC : CV (%)	33	Lobe Distribution Percentage (%) Blood Flow Rate RL	11.8	Lung : NL (%)	0.3	Use Plasma ES Option	Yes	Liver (Port) : Male (% of Qc)	19	Abundance : Apical Influx (BBB) Mean	1	Additional Organ : FcRn Concentration (μM)	40	Adipose σv	0.815			Target3 Kshed CV (%)	30
	Alpha	2.1	Fasted Gallbladder Release Constant Mean (1/h)	0.18	Kidney Size BW Coeff	2.04	SCorneum Fat (%) : Male	12.9	Use NEWE model for MBI and/or induction of gut CYPs	No	Lobe Distribution Percentage (%) Blood Flow Rate RL	8.6	Lung : NP (%)	0.9	Abundance : Plasma ES EM Mean	1	Liver (Port) : Female (% of Qc)	21.5	Abundance : Apical Influx (BBB) CV (%)	0	Additional Organ : FcRn Concentration CV (%)	30	Bone σv	1			Target3 Lambda (1/h)	0
	Beta	24.7	Fasted Gallbladder Release Constant CV (%)	30	Kidney Size BH Coeff	51.8	SCorneum Fat CV (%) : Male	47	CYP2C9 EM Mean	12.9	Lobe Distribution Percentage (%) Blood Flow Rate RL	34.9	Muscle : EW (%)	9.1	Abundance : Plasma ES EM CV (%)	30	Lung : Male (% of Qc)	100	Abundance : Apical Influx (BCSFB) Mean	1	Additional Organ : IgG CLcat (L/h)	0.0175	Brain σv	0.998			Target4 Name	Transferrin 4
	Female Distribution	Weibull	Fed Gallbladder Release Constant Mean (1/h)	0.48	Kidney Weight CV (%)	23.4	SCorneum Fat (%) : Female	12.9	CYP2C9 EM CV (%)	60	Lobe Distribution Percentage (%) Blood Flow Rate RL	8.6	Muscle : NL (%)	2.38	Abundance : Plasma ES PM Mean	0	Lung : Female (% of Qc)	100	Abundance : Apical Influx (BCSFB) CV (%)	0	Additional Organ : IgG CLcat CV (%)	30	Gut σv	0.8			Target4 Rmax (µM)	3.3
	Alpha	1.9	Fed Gallbladder Release Constant CV (%)	19	Kidney Density	1050	SCorneum Fat CV (%) : Female	47	CYP2C9 PM Mean	3.8	Lobe Distribution Percentage (%) Blood Flow Rate RL	5	Muscle : NP (%)	0.72	Abundance : Plasma ES PM CV (%)	0	Muscle : Male (% of Qc)	17	Abundance : Apical Efflux (BCSFB) Mean	1	Additional Organ : Kup (1/h)	0.02979	Heart σv	0.489			Target4 Rmax CV (%)	30
	Beta	24.7	Fasted Gallbladder Residual Volume Mean (%)	79.4	PTCPGK Mean	60	VEpidermis Thickness (µm) : Male	37.1	CYP2C9 PM Mean CV (%)	60	Lobe Distribution Percentage (%) Blood Flow Rate RL	2.5	Pancreas : EW (%)	12	Abundance : Plasma ES UM Mean	0	Muscle : Female (% of Qc)	12	Abundance : Apical Efflux (BCSFB) CV (%)	0	Additional Organ : Krc1 (1/h)	3.605	Kidney σv	0.726			Target4 Kdeg (1/h)	0.0625
	Abundance : CYP1A2 PM Freq	0	Fasted Gallbladder Residual Volume CV (%)	13.1	PTCPGK CV (%)	30	VEpidermis Thickness CV (%) : Male	51	CYP2C9 UM Mean	0	Lobe Distribution Percentage (%) Alveoli Volume RL	26.3	Pancreas : NL (%)	4.1	Abundance : Plasma ES UM CV (%)	0	Skin : Male (% of Qc)	5			Additional Organ : Krc2 (1/h)	7.21	Liver σv	0.22			Target4 Kdeg CV (%)	30
	Abundance : CYP1A2 UM Freq	0	Fed Gallbladder Residual Volume Mean (%)	59.9	MPPGK Mean	12.8	VEpidermis Thickness (µm) : Female	45.7	CYP2C9 UM Mean CV (%)	0	Lobe Distribution Percentage (%) Alveoli Volume RL	10.5	Pancreas : NP (%)	0.93	Abundance : Plasma ES IM Mean	0	Skin : Female (% of Qc)	5			Additional Organ : FR	0.715	Lung σv	0.397			Target4 Kshed (1/hr)	0
	Abundance : CYP1A2 IM Freq	0	Fed Gallbladder Residual Volume CV (%)	39.6	MPPGK CV (%)	55	VEpidermis Thickness CV (%) : Female	62	CYP2C9 IM Mean	0	Lobe Distribution Percentage (%) Alveoli Volume RL	15.8	Skin : EW (%)	62.3	Abundance : Plasma ES IM CV (%)	0	Spleen : Male (% of Qc)	2			Additional Organ : σv (Sigmav)	0	Muscle σv	0.875			Target4 Kshed CV (%)	30
	Abundance : CYP2A6 PM Freq	0	Enzyme interCorr Switch	Off	CPPGK Mean	0	VEpidermis Fat (%) : Male	3	CYP2C9 IM Mean CV (%)	0	Lobe Distribution Percentage (%) Alveoli Volume RL	26.3	Skin : NL (%)	2.84			Spleen : Female (% of Qc)	3			Additional Organ : σl (Sigmal)	0	Skin σv	0.822			Target4 Lambda (1/h)	0
	Abundance : CYP2A6 UM Freq	0	Enzyme Corr Switch	On	CPPGK CV (%)	30	VEpidermis Fat CV (%) : Male	30	CYP2C9 Mean Turnover Rate	0.03	Lobe Distribution Percentage (%) Alveoli Volume RL	21	Skin : NP (%)	1.11			Qmax	4			Additional Organ : ε (L/h)	0.24	Spleen σv	0.2			Target5 Name	Target 5
	Abundance : CYP2A6 IM Freq	0	Enz Corr C0	62.775	S9 Method	Predicted	VEpidermis Fat (%) : Female	3	CYP2C9 Mean Turnover Rate CV (%)	20	Lobe Distribution Percentage (%) Alveoli Volume RL	50	Spleen : EW (%)	20.8			Qmax CV (%)	20			Additional Organ : ε CV	30	Additional Organ σv	0			Target5 Rmax (µM)	0
	Abundance : CYP2B6 PM Freq	0.11	Enz Corr C1	0.3934	S9PPGK Mean	12.8	VEpidermis Fat CV (%) : Female	30	Colon CYP2C9 EM Mean	0	Lobe Distribution Percentage (%) Alveoli Volume RL	50	Spleen : NL (%)	2.01			Cap on PV Blood Flow Fed/Fasted ratio	10			Additional Organ : PS Lock	Locked	Pancreas σv	0.5			Target5 Rmax CV (%)	30
	Abundance : CYP2B6 UM Freq	0	Enz 2 Corr CV	24	UGT1A1 EM Mean	1			Colon CYP2C9 EM CV (%)	0	Lobe Distribution Percentage (%) Absorption Area RL	26.3	Spleen : NP (%)	1.98							Additional Organ : PS (L/h)	0.0169225	Adipose σl	0.2			Target5 Kdeg (1/h)	0
	Abundance : CYP2B6 IM Freq	0	Abundance : CYP1A2 EM Mean	52	UGT1A1 EM Mean CV (%)	50	MechDermA - Lower Leg		Colon CYP2C9 PM Mean	N/A	Lobe Distribution Percentage (%) Absorption Area RL	10.5	Plasma : EW (%)	94.5							Additional Organ : PS CV (%)	30	Bone σl	0.2			Target5 Kdeg CV (%)	30
	Abundance : CYP2C8 PM Freq	0	Abundance : CYP1A2 EM CV (%)	67	UGT1A1 PM Mean	0.42	SCorneum Thickness (µm) : Male	16.8	Colon CYP2C9 PM Mean CV (%)	N/A	Lobe Distribution Percentage (%) Absorption Area RL	15.8	Plasma : NL (%)	0.35							Additional Organ : R,krough (μm)	75	Brain σl	0.2			Target5 Kshed (1/hr)	0
	Abundance : CYP2C8 UM Freq	0	Abundance : CYP1A2 PM Mean	0	UGT1A1 PM Mean CV (%)	50	SCorneum Thickness CV (%) : Male	52	Colon CYP2C9 UM Mean	N/A	Lobe Distribution Percentage (%) Absorption Area RL	26.3	Plasma : NP (%)	0.22							Additional Organ : R,krough CV	0	Gut σl	0.2			Target5 Kshed CV (%)	30
	Abundance : CYP2C8 IM Freq	0	Abundance : CYP1A2 PM CV (%)	0	UGT1A1 UM Mean	1.46	SCorneum Thickness (µm) : Female	13.9	Colon CYP2C9 UM Mean CV (%)	N/A	Lobe Distribution Percentage (%) Absorption Area RL	21	RBC : EW (%)	0							Additional Organ : r	0	Heart σl	0.2			Target5 Lambda (1/h)	0
	Abundance : CYP2C9 PM Freq	0.06	Abundance : CYP1A2 UM Mean	0	UGT1A1 UM Mean CV (%)	50	SCorneum Thickness CV (%) : Female	43	Colon CYP2C9 IM Mean	N/A	Lobe Distribution Percentage (%) Absorption Area RL	50	RBC : NL (%)	0.17							Additional Organ : r CV	0	Kidney σl	0.2			Target6 Name	Target 6
	Abundance : CYP2C9 UM Freq	0	Abundance : CYP1A2 UM CV (%)	0	UGT1A1 IM Mean	0.72	SCorneum Fat (%) : Male	4.7	Colon CYP2C9 IM Mean CV (%)	N/A	Lobe Distribution Percentage (%) Absorption Area RL	50	RBC : NP (%)	0.29							Additional Organ : Rcap (μm)	0	Liver σl	0.2			Target6 Rmax (µM)	0
	Abundance : CYP2C9 IM Freq	0	Abundance : CYP1A2 IM Mean	0	UGT1A1 IM Mean CV (%)	50	SCorneum Fat CV (%) : Male	62	Colon CYP2C9 Mean Turnover Rate	N/A	Lobe Distribution Percentage (%) Pulmonary Capilliary Blood Volume RL	16.66	Adipose : IW (%)	3.9							Additional Organ : Rcap CV	0	Lung σl	0.2			Target6 Rmax CV (%)	30
	Abundance : CYP2C18 PM Freq	0	Abundance : CYP1A2 IM CV (%)	0	UGT1A1 Absolute Abundance	6.1	SCorneum Fat (%) : Female	4.7	Colon CYP2C9 Mean Turnover Rate CV (%)	N/A	Lobe Distribution Percentage (%) Pulmonary Capilliary Blood Volume RL	16.67	Adipose : AP (mg/g)	0.4									Muscle σl	0.2			Target6 Kdeg (1/h)	0
	Abundance : CYP2C18 UM Freq	0	Turnover rate : CYP1A2 Mean	0.0183	UGT1A1 Mean Turnover Rate	0.0578	SCorneum Fat CV (%) : Female	62	CYP2C19 EM Mean	1.5	Lobe Distribution Percentage (%) Pulmonary Capilliary Blood Volume RL	16.67	Adipose : KpALB	0.037									Skin σl	0.2			Target6 Kdeg CV (%)	30
	Abundance : CYP2C18 IM Freq	0	Turnover rate : CYP1A2 CV (%)	56	UGT1A1 Mean Turnover Rate CV (%)	30	VEpidermis Thickness (µm) : Male	63.4	CYP2C19 EM CV (%)	60	Lobe Distribution Percentage (%) Pulmonary Capilliary Blood Volume RL	16.67	Adipose : KpLPP	0.068									Spleen σl	0.2			Target6 Kshed (1/hr)	0
	Abundance : CYP2C19 PM Freq	0.024	Abundance : CYP2A6 EM Mean	20	UGT1A3 EM Mean	1	VEpidermis Thickness CV (%) : Male	32	CYP2C19 PM Mean	0	Lobe Distribution Percentage (%) Pulmonary Capilliary Blood Volume RL	16.67	Bone : IW (%)	34.1									Additional Organ σl	0			Target6 Kshed CV (%)	30
	Abundance : CYP2C19 UM Freq	0	Abundance : CYP2A6 EM CV (%)	173	UGT1A3 EM Mean CV (%)	50	VEpidermis Thickness (µm) : Female	74.9	CYP2C19 PM Mean CV (%)	0	Lobe Distribution Percentage (%) Pulmonary Capilliary Blood Volume RL	8.33	Bone : AP (mg/g)	0.67									Pancreas σl	0.2			Target6 Lambda (1/h)	0
	Abundance : CYP2C19 IM Freq	0	Abundance : CYP2A6 PM Mean	0	UGT1A3 PM Mean	0	VEpidermis Thickness CV (%) : Female	19	CYP2C19 UM Mean	0	Lobe Distribution Percentage (%) Pulmonary Capilliary Blood Volume RL	8.33	Bone : KpALB	0.1									Adipose FR	0			Target7 Name	Target 7
	Abundance : CYP2D6 PM Freq	0.082	Abundance : CYP2A6 PM CV (%)	0	UGT1A3 PM Mean CV (%)	0	VEpidermis Fat (%) : Male	3	CYP2C19 UM Mean CV (%)	0	Lobe Distribution Percentage (%) Pulmonary Mass Volume RL	16.66	Bone : KpLPP	0.05									Bone FR	1			Target7 Rmax (µM)	0
	Abundance : CYP2D6 UM Freq	0.053	Abundance : CYP2A6 UM Mean	0	UGT1A3 UM Mean	0	VEpidermis Fat CV (%) : Male	30	CYP2C19 IM Mean	0	Lobe Distribution Percentage (%) Pulmonary Mass Volume RL	16.67	Brain : IW (%)	67.8									Brain FR	1			Target7 Rmax CV (%)	30
	Abundance : CYP2D6 IM Freq	0	Abundance : CYP2A6 UM CV (%)	0	UGT1A3 UM Mean CV (%)	0	VEpidermis Fat (%) : Female	3	CYP2C19 IM Mean CV (%)	0	Lobe Distribution Percentage (%) Pulmonary Mass Volume RL	16.67	Brain : AP (mg/g)	0.4									Gut FR	1			Target7 Kdeg (1/h)	0
	Abundance : CYP2E1 PM Freq	0	Abundance : CYP2A6 IM Mean	0	UGT1A3 IM Mean	0	VEpidermis Fat CV (%) : Female	30	CYP2C19 Mean Turnover Rate	0.03	Lobe Distribution Percentage (%) Pulmonary Mass Volume RL	16.67	Brain : KpALB	0.048									Heart FR	1			Target7 Kdeg CV (%)	30
	Abundance : CYP2E1 UM Freq	0	Abundance : CYP2A6 IM CV (%)	0	UGT1A3 IM Mean CV (%)	0			CYP2C19 Mean Turnover Rate CV (%)	20	Lobe Distribution Percentage (%) Pulmonary Mass Volume RL	16.67	Brain : KpLPP	0.041									Kidney FR	1			Target7 Kshed (1/hr)	0
	Abundance : CYP2E1 IM Freq	0	Turnover rate : CYP2A6 Mean	0.0267	UGT1A3 Absolute Abundance	0	MechDermA - Thigh		Colon CYP2C19 EM Mean	0	Lobe Distribution Percentage (%) Pulmonary Mass Volume RL	8.33	Gut : IW (%)	45.1									Liver FR	1			Target7 Kshed CV (%)	30
	Abundance : CYP2J2 PM Freq	0	Turnover rate : CYP2A6 CV (%)	56	UGT1A3 Mean Turnover Rate	1e-06	SCorneum Thickness (µm) : Male	11	Colon CYP2C19 EM CV (%)	0	Lobe Distribution Percentage (%) Pulmonary Mass Volume RL	8.33	Gut : AP (mg/g)	2.84									Lung FR	1			Target7 Lambda (1/h)	0
	Abundance : CYP2J2 UM Freq	0	Abundance : CYP2B6 EM Mean	17	UGT1A3 Mean Turnover Rate CV (%)	30	SCorneum Thickness CV (%) : Male	32	Colon CYP2C19 PM Mean	N/A	Lobe Distribution Percentage (%) Epithelial Lining Fluid Volume RL	16.66	Gut : KpALB	0.158									Muscle FR	0			Target8 Name	Target 8
	Abundance : CYP2J2 IM Freq	0	Abundance : CYP2B6 EM CV (%)	122	UGT1A4 EM Mean	1	SCorneum Thickness (µm) : Female	11	Colon CYP2C19 PM Mean CV (%)	N/A	Lobe Distribution Percentage (%) Epithelial Lining Fluid Volume RL	16.67	Gut : KpLPP	0.141									Skin FR	0			Target8 Rmax (µM)	0
	Abundance : CYP3A4 PM Freq	0	Abundance : CYP2B6 PM Mean	6	UGT1A4 EM Mean CV (%)	50	SCorneum Thickness CV (%) : Female	20	Colon CYP2C19 UM Mean	N/A	Lobe Distribution Percentage (%) Epithelial Lining Fluid Volume RL	16.67	Heart : IW (%)	44.5									Spleen FR	1			Target8 Rmax CV (%)	30
	Abundance : CYP3A4 UM Freq	0	Abundance : CYP2B6 PM CV (%)	200	UGT1A4 PM Mean	0	SCorneum Fat (%) : Male	23.7	Colon CYP2C19 UM Mean CV (%)	N/A	Lobe Distribution Percentage (%) Epithelial Lining Fluid Volume RL	16.67	Heart : AP (mg/g)	3.07									Additional Organ FR	1			Target8 Kdeg (1/h)	0
	Abundance : CYP3A4 IM Freq	0	Abundance : CYP2B6 UM Mean	0	UGT1A4 PM Mean CV (%)	0	SCorneum Fat CV (%) : Male	24	Colon CYP2C19 IM Mean	N/A	Lobe Distribution Percentage (%) Epithelial Lining Fluid Volume RL	16.67	Heart : KpALB	0.157									Pancreas FR	1			Target8 Kdeg CV (%)	30
	Abundance : CYP3A5 PM Freq	0.83	Abundance : CYP2B6 UM CV (%)	0	UGT1A4 UM Mean	0	SCorneum Fat (%) : Female	23.7	Colon CYP2C19 IM Mean CV (%)	N/A	Lobe Distribution Percentage (%) Epithelial Lining Fluid Volume RL	8.33	Heart : KpLPP	0.16									Adipose FcRn	0.93069			Target8 Kshed (1/hr)	0
	Abundance : CYP3A5 UM Freq	0	Abundance : CYP2B6 IM Mean	0	UGT1A4 UM Mean CV (%)	0	SCorneum Fat CV (%) : Female	24	Colon CYP2C19 Mean Turnover Rate	N/A	Lobe Distribution Percentage (%) Epithelial Lining Fluid Volume RL	8.33	Kidney : IW (%)	50									Bone FcRn	2.24581			Target8 Kshed CV (%)	30
	Abundance : CYP3A5 IM Freq	0	Abundance : CYP2B6 IM CV (%)	0	UGT1A4 IM Mean	0	VEpidermis Thickness (µm) : Male	53.3	Colon CYP2C19 Mean Turnover Rate CV (%)	N/A	Lobe Distribution Percentage (%) Ventillation Rate RM	25.9	Kidney : AP (mg/g)	2.48									Brain FcRn	0.246748			Target8 Lambda (1/h)	0
	Abundance : CYP3A7 PM Freq	0.88	Turnover rate : CYP2B6 Mean	0.0217	UGT1A4 IM Mean CV (%)	0	VEpidermis Thickness CV (%) : Male	40	CYP2D6 EM Mean	0.8	Lobe Distribution Percentage (%) Ventillation Rate RM	12.4	Kidney : KpALB	0.13									Gut FcRn	1.69464			Target9 Name	Target 9
	Abundance : CYP3A7 UM Freq	0	Turnover rate : CYP2B6 CV (%)	56	UGT1A4 Absolute Abundance	8.7	VEpidermis Thickness (µm) : Female	43.3	CYP2D6 EM CV (%)	60	Lobe Distribution Percentage (%) Ventillation Rate RM	14.8	Kidney : KpLPP	0.137									Heart FcRn	0.864965			Target9 Rmax (µM)	0
	Abundance : CYP3A7 IM Freq	0	Abundance : CYP2C8 EM Mean	24	UGT1A4 Mean Turnover Rate	1e-06	VEpidermis Thickness CV (%) : Female	40	CYP2D6 PM Mean	0	Lobe Distribution Percentage (%) Ventillation Rate RM	32.1	Liver : IW (%)	58.6									Kidney FcRn	0.766998			Target9 Rmax CV (%)	30
	Abundance : CYP2C9 Allelele 1 Genotype 1 Freq	0.672	Abundance : CYP2C8 EM CV (%)	81	UGT1A4 Mean Turnover Rate CV (%)	30	VEpidermis Fat (%) : Male	3	CYP2D6 PM Mean CV (%)	0	Lobe Distribution Percentage (%) Ventillation Rate RM	14.8	Liver : AP (mg/g)	5.09									Liver FcRn	2.40702			Target9 Kdeg (1/h)	0
	Abundance : CYP2C9 Allelele 1 Genotype 2 Freq	0.186	Abundance : CYP2C8 PM Mean	0	UGT1A5 EM Mean	1	VEpidermis Fat CV (%) : Male	30	CYP2D6 UM Mean	1.6	Lobe Distribution Percentage (%) Ventillation Rate RM	100	Liver : KpALB	0.086									Lung FcRn	3.04753			Target9 Kdeg CV (%)	30
	Abundance : CYP2C9 Allelele 1 Genotype 3 Freq	0.111	Abundance : CYP2C8 PM CV (%)	0	UGT1A5 EM Mean CV (%)	50	VEpidermis Fat (%) : Female	3	CYP2D6 UM Mean CV (%)	60	Lobe Distribution Percentage (%) Ventillation Rate RM	100	Liver : KpLPP	0.161									Muscle FcRn	0.485806			Target9 Kshed (1/hr)	0
	Abundance : CYP2C9 Allelele 1 Genotype 4 Freq	0.011	Abundance : CYP2C8 UM Mean	0	UGT1A5 PM Mean	0	VEpidermis Fat CV (%) : Female	30	CYP2D6 IM Mean	0	Lobe Distribution Percentage (%) Blood Flow Rate RM	2.5	Lung : IW (%)	46.3									Skin FcRn	2.96258			Target9 Kshed CV (%)	30
	Abundance : CYP2C9 Allelele 1 Genotype 5 Freq	0.017	Abundance : CYP2C8 UM CV (%)	0	UGT1A5 PM Mean CV (%)	0			CYP2D6 IM Mean CV (%)	0	Lobe Distribution Percentage (%) Blood Flow Rate RM	11.8	Lung : AP (mg/g)	0.5									Spleen FcRn	2.24581			Target9 Lambda (1/h)	0
	Abundance : CYP2C9 Allelele 1 Genotype 6 Freq	0.003	Abundance : CYP2C8 IM Mean	0	UGT1A5 UM Mean	0	MechDermA - Face		CYP2D6 Mean Turnover Rate	0.03	Lobe Distribution Percentage (%) Blood Flow Rate RM	8.6	Lung : KpALB	0.212									Additional Organ FcRn	1			Target10 Name	Target 10
	Abundance : UGT1A1 PM Freq	0.11	Abundance : CYP2C8 IM CV (%)	0	UGT1A5 UM Mean CV (%)	0	SCorneum Thickness (µm) : Male	14.3	CYP2D6 Mean Turnover Rate CV (%)	20	Lobe Distribution Percentage (%) Blood Flow Rate RM	34.9	Lung : KpLPP	0.168									Pancreas FcRn	1.69464			Target10 Rmax (µM)	0
	Abundance : UGT1A1 UM Freq	0.01	Turnover rate : CYP2C8 Mean	0.0301	UGT1A5 IM Mean	0	SCorneum Thickness CV (%) : Male	23	Colon CYP2D6 EM Mean	0	Lobe Distribution Percentage (%) Blood Flow Rate RM	8.6	Muscle : IW (%)	66.9									Adipose PS	0			Target10 Rmax CV (%)	30
	Abundance : UGT1A1 IM Freq	0.44	Turnover rate : CYP2C8 CV (%)	56	UGT1A5 IM Mean CV (%)	0	SCorneum Thickness (µm) : Female	15.6	Colon CYP2D6 EM CV (%)	0	Lobe Distribution Percentage (%) Blood Flow Rate RM	5	Muscle : AP (mg/g)	2.49									Bone PS	0.1			Target10 Kdeg (1/h)	0
	Abundance : UGT1A3 PM Freq	0	Abundance : CYP2C9 EM Mean	73	UGT1A5 Absolute Abundance	0	SCorneum Thickness CV (%) : Female	21	Colon CYP2D6 PM Mean	N/A	Lobe Distribution Percentage (%) Blood Flow Rate RM	2.5	Muscle : KpALB	0.034									Brain PS	0			Target10 Kdeg CV (%)	30
	Abundance : UGT1A3 UM Freq	0	Abundance : CYP2C9 EM CV (%)	54	UGT1A5 Mean Turnover Rate	1e-06	SCorneum Fat (%) : Male	7.2	Colon CYP2D6 PM Mean CV (%)	N/A	Lobe Distribution Percentage (%) Alveoli Volume RM	26.3	Muscle : KpLPP	0.059									Gut PS	0			Target10 Kshed (1/hr)	0
	Abundance : UGT1A3 IM Freq	0	Abundance : CYP2C9 PM Mean	29	UGT1A5 Mean Turnover Rate CV (%)	30	SCorneum Fat CV (%) : Male	12	Colon CYP2D6 UM Mean	N/A	Lobe Distribution Percentage (%) Alveoli Volume RM	10.5	Skin : IW (%)	9.47									Heart PS	0			Target10 Kshed CV (%)	30
	Abundance : UGT1A4 PM Freq	0	Abundance : CYP2C9 PM CV (%)	73	UGT1A6 EM Mean	1	SCorneum Fat (%) : Female	7.2	Colon CYP2D6 UM Mean CV (%)	N/A	Lobe Distribution Percentage (%) Alveoli Volume RM	15.8	Skin : AP (mg/g)	1.32									Kidney PS	0			Target10 Lambda (1/h)	0
	Abundance : UGT1A4 UM Freq	0	Abundance : CYP2C9 UM Mean	0	UGT1A6 EM Mean CV (%)	50	SCorneum Fat CV (%) : Female	12	Colon CYP2D6 IM Mean	N/A	Lobe Distribution Percentage (%) Alveoli Volume RM	26.3	Skin : KpALB	0.277									Liver PS	0			Target11 Name	Target 11
	Abundance : UGT1A4 IM Freq	0	Abundance : CYP2C9 UM CV (%)	0	UGT1A6 PM Mean	0	VEpidermis Thickness (µm) : Male	38.9	Colon CYP2D6 IM Mean CV (%)	N/A	Lobe Distribution Percentage (%) Alveoli Volume RM	21	Skin : KpLPP	0.096									Lung PS	0			Target11 Rmax (µM)	0
	Abundance : UGT1A5 PM Freq	0	Abundance : CYP2C9 IM Mean	0	UGT1A6 PM Mean CV (%)	0	VEpidermis Thickness CV (%) : Male	50	Colon CYP2D6 Mean Turnover Rate	N/A	Lobe Distribution Percentage (%) Alveoli Volume RM	50	Spleen : IW (%)	57.9									Muscle PS	0			Target11 Rmax CV (%)	30
	Abundance : UGT1A5 UM Freq	0	Abundance : CYP2C9 IM CV (%)	0	UGT1A6 UM Mean	0	VEpidermis Thickness (µm) : Female	37.4	Colon CYP2D6 Mean Turnover Rate CV (%)	N/A	Lobe Distribution Percentage (%) Alveoli Volume RM	50	Spleen : AP (mg/g)	2.81									Skin PS	0			Target11 Kdeg (1/h)	0
	Abundance : UGT1A5 IM Freq	0	Turnover rate : CYP2C9 Mean	0.0067	UGT1A6 UM Mean CV (%)	0	VEpidermis Thickness CV (%) : Female	21	CYP2J2 EM Mean	1.4	Lobe Distribution Percentage (%) Absorption Area RM	26.3	Spleen : KpALB	0.097									Spleen PS	0			Target11 Kdeg CV (%)	30
	Abundance : UGT1A6 PM Freq	0	Turnover rate : CYP2C9 CV (%)	56	UGT1A6 IM Mean	0	VEpidermis Fat (%) : Male	3	CYP2J2 EM CV (%)	60	Lobe Distribution Percentage (%) Absorption Area RM	10.5	Spleen : KpLPP	0.207									Additional Organ PS	0			Target11 Kshed (1/hr)	0
	Abundance : UGT1A6 UM Freq	0	Abundance : CYP2C18 EM Mean	1	UGT1A6 IM Mean CV (%)	0	VEpidermis Fat CV (%) : Male	30	CYP2J2 PM Mean	0	Lobe Distribution Percentage (%) Absorption Area RM	15.8	Plasma : IW (%)	0									Pancreas PS	0			Target11 Kshed CV (%)	30
	Abundance : UGT1A6 IM Freq	0	Abundance : CYP2C18 EM CV (%)	106	UGT1A6 Absolute Abundance	3.6	VEpidermis Fat (%) : Female	3	CYP2J2 PM Mean CV (%)	0	Lobe Distribution Percentage (%) Absorption Area RM	26.3	Plasma : AP (mg/g)	0.04									Adipose fCLcat	0.05			Target11 Lambda (1/h)	0
	Abundance : UGT1A7 PM Freq	0	Abundance : CYP2C18 PM Mean	0	UGT1A6 Mean Turnover Rate	1e-06	VEpidermis Fat CV (%) : Female	30	CYP2J2 UM Mean	0	Lobe Distribution Percentage (%) Absorption Area RM	21	RBC : IW (%)	66.6									Bone fCLcat	0.05			Target12 Name	Target 12
	Abundance : UGT1A7 UM Freq	0	Abundance : CYP2C18 PM CV (%)	0	UGT1A6 Mean Turnover Rate CV (%)	30			CYP2J2 UM Mean CV (%)	0	Lobe Distribution Percentage (%) Absorption Area RM	50	RBC : AP (mg/g)	0.44									Brain fCLcat	0.0009			Target12 Rmax (µM)	0
	Abundance : UGT1A7 IM Freq	0	Abundance : CYP2C18 UM Mean	0	UGT1A7 EM Mean	1	MPMLA - Forehead		CYP2J2 IM Mean	0	Lobe Distribution Percentage (%) Absorption Area RM	50	Pancreas : IW (%)	66.4									Gut fCLcat	0.025			Target12 Rmax CV (%)	30
	Abundance : UGT1A8 PM Freq	0	Abundance : CYP2C18 UM CV (%)	0	UGT1A7 EM Mean CV (%)	50	Skin surface pH : Male	4.7	CYP2J2 IM Mean CV (%)	0	Lobe Distribution Percentage (%) Pulmonary Capilliary Blood Volume RM	16.66	Pancreas : AP (mg/g)	1.67									Heart fCLcat	0.0054			Target12 Kdeg (1/h)	0
	Abundance : UGT1A8 UM Freq	0	Abundance : CYP2C18 IM Mean	0	UGT1A7 PM Mean	0	Skin surface pH CV (%) : Male	7.8	CYP2J2 Mean Turnover Rate	0.03	Lobe Distribution Percentage (%) Pulmonary Capilliary Blood Volume RM	16.67	Pancreas : KpALB	0.06									Kidney fCLcat	0.041			Target12 Kdeg CV (%)	30
	Abundance : UGT1A8 IM Freq	0	Abundance : CYP2C18 IM CV (%)	0	UGT1A7 PM Mean CV (%)	0	Skin surface pH : Female	4.8	CYP2J2 Mean Turnover Rate CV (%)	20	Lobe Distribution Percentage (%) Pulmonary Capilliary Blood Volume RM	16.67	Pancreas : KpLPP	0.06									Liver fCLcat	0.41			Target12 Kshed (1/hr)	0
	Abundance : UGT1A9 PM Freq	0.04	Turnover rate : CYP2C18 Mean	0.0267	UGT1A7 UM Mean	0	Skin surface pH CV (%) : Female	8	Colon CYP2J2 EM Mean	0	Lobe Distribution Percentage (%) Pulmonary Capilliary Blood Volume RM	16.67	Adipose Volume Scalar	1									Lung fCLcat	0.0057			Target12 Kshed CV (%)	30
	Abundance : UGT1A9 UM Freq	0	Turnover rate : CYP2C18 CV (%)	56	UGT1A7 UM Mean CV (%)	0	Skin temperature (°C) : Male	32	Colon CYP2J2 EM CV (%)	0	Lobe Distribution Percentage (%) Pulmonary Capilliary Blood Volume RM	16.67	Bone Volume Scalar	1									Muscle fCLcat	0.1			Target12 Lambda (1/h)	0
	Abundance : UGT1A9 IM Freq	0	Abundance : CYP2C19 EM Mean	14	UGT1A7 IM Mean	0	Skin temperature CV (%) : Male	0	Colon CYP2J2 PM Mean	N/A	Lobe Distribution Percentage (%) Pulmonary Capilliary Blood Volume RM	8.33	Brain Volume Scalar	1									Skin fCLcat	0.27			Target13 Name	Target 13
	Abundance : UGT1A10 PM Freq	0	Abundance : CYP2C19 EM CV (%)	106	UGT1A7 IM Mean CV (%)	0	Skin temperature (°C) : Female	32	Colon CYP2J2 PM Mean CV (%)	N/A	Lobe Distribution Percentage (%) Pulmonary Capilliary Blood Volume RM	8.33	Gut Volume Scalar	1									Spleen fCLcat	0.018			Target13 Rmax (µM)	0
	Abundance : UGT1A10 UM Freq	0	Abundance : CYP2C19 PM Mean	0	UGT1A7 Absolute Abundance	13	Skin temperature CV (%) : Female	0	Colon CYP2J2 UM Mean	N/A	Lobe Distribution Percentage (%) Pulmonary Mass Volume RM	16.66	Heart Volume Scalar	1									Additional Organ fCLcat	0.01			Target13 Rmax CV (%)	30
	Abundance : UGT1A10 IM Freq	0	Abundance : CYP2C19 PM CV (%)	0	UGT1A7 Mean Turnover Rate	1e-06	Shape of corneocyte : Male	Cuboid (brick)	Colon CYP2J2 UM Mean CV (%)	N/A	Lobe Distribution Percentage (%) Pulmonary Mass Volume RM	16.67	Kidney Volume Scalar	1									Pancreas fCLcat	0.005			Target13 Kdeg (1/h)	0
	Abundance : UGT2B4 PM Freq	0	Abundance : CYP2C19 UM Mean	0	UGT1A7 Mean Turnover Rate CV (%)	30	Shape of corneocyte : Female	Cuboid (brick)	Colon CYP2J2 IM Mean	N/A	Lobe Distribution Percentage (%) Pulmonary Mass Volume RM	16.67	Liver Volume Scalar	1									Kup Full PBPK (1/h)	0.0298			Target13 Kdeg CV (%)	30
	Abundance : UGT2B4 UM Freq	0	Abundance : CYP2C19 UM CV (%)	0	UGT1A8 EM Mean	1	Number of SC layers : Male	12	Colon CYP2J2 IM Mean CV (%)	N/A	Lobe Distribution Percentage (%) Pulmonary Mass Volume RM	16.67	Lung Volume Scalar	1									Krc Full PBPK (1/h)	3.605			Target13 Kshed (1/hr)	0
	Abundance : UGT2B4 IM Freq	0	Abundance : CYP2C19 IM Mean	0	UGT1A8 EM Mean CV (%)	50	Number of SC layers CV (%) : Male	8.4	Colon CYP2J2 Mean Turnover Rate	N/A	Lobe Distribution Percentage (%) Pulmonary Mass Volume RM	16.67	Muscle Volume Scalar	1									Krc,complex Full PBPK (1/h)	7.21			Target13 Kshed CV (%)	30
	Abundance : UGT2B7 PM Freq	0	Abundance : CYP2C19 IM CV (%)	0	UGT1A8 PM Mean	0	Number of SC layers : Female	12	Colon CYP2J2 Mean Turnover Rate CV (%)	N/A	Lobe Distribution Percentage (%) Pulmonary Mass Volume RM	8.33	Skin Volume Scalar	1									Additional Clearance Full PBPK (L/h)	0.0020407			Target13 Lambda (1/h)	0
	Abundance : UGT2B7 UM Freq	0	Turnover rate : CYP2C19 Mean	0.0267	UGT1A8 PM Mean CV (%)	0	Number of SC layers CV (%) : Female	8.4	CYP3A4 EM Mean	66.2	Lobe Distribution Percentage (%) Pulmonary Mass Volume RM	8.33	Spleen Volume Scalar	1									Additional Clearance Full PBPK CV (%)	10			Target14 Name	Target 14
	Abundance : UGT2B7 IM Freq	0	Turnover rate : CYP2C19 CV (%)	56	UGT1A8 UM Mean	0	Water density (gm/cm3) : Male	1	CYP3A4 EM CV (%)	60	Lobe Distribution Percentage (%) Epithelial Lining Fluid Volume RM	16.66	Plasma Volume Scalar	1													Target14 Rmax (µM)	0
	Abundance : UGT2B10 PM Freq	0	Abundance : CYP2D6 EM Mean	8	UGT1A8 UM Mean CV (%)	0	Water density CV (%) : Male	0	CYP3A4 PM Mean	0	Lobe Distribution Percentage (%) Epithelial Lining Fluid Volume RM	16.67	Membrane potential : Adipose (mV)	-41													Target14 Rmax CV (%)	30
	Abundance : UGT2B10 UM Freq	0	Abundance : CYP2D6 EM CV (%)	61	UGT1A8 IM Mean	0	Water density (gm/cm3) : Female	1	CYP3A4 PM Mean CV (%)	0	Lobe Distribution Percentage (%) Epithelial Lining Fluid Volume RM	16.67	Membrane potential : Bone (mV)	-41													Target14 Kdeg (1/h)	0
	Abundance : UGT2B10 IM Freq	0	Abundance : CYP2D6 PM Mean	0	UGT1A8 IM Mean CV (%)	0	Water density CV (%) : Female	0	CYP3A4 UM Mean	0	Lobe Distribution Percentage (%) Epithelial Lining Fluid Volume RM	16.67	Membrane potential : Brain (mV)	-41													Target14 Kdeg CV (%)	30
	Abundance : UGT2B11 PM Freq	0	Abundance : CYP2D6 PM CV (%)	0	UGT1A8 Absolute Abundance	4.9	SC lipids density (gm/cm3) : Male	0.9	CYP3A4 UM Mean CV (%)	0	Lobe Distribution Percentage (%) Epithelial Lining Fluid Volume RM	16.67	Membrane potential : Gut (mV)	-41													Target14 Kshed (1/hr)	0
	Abundance : UGT2B11 UM Freq	0	Abundance : CYP2D6 UM Mean	16	UGT1A8 Mean Turnover Rate	1e-06	SC lipids density CV (%) : Male	0	CYP3A4 IM Mean	0	Lobe Distribution Percentage (%) Epithelial Lining Fluid Volume RM	8.33	Membrane potential : Heart (mV)	-41													Target14 Kshed CV (%)	30
	Abundance : UGT2B11 IM Freq	0	Abundance : CYP2D6 UM CV (%)	61	UGT1A8 Mean Turnover Rate CV (%)	30	SC lipids density (gm/cm3) : Female	0.9	CYP3A4 IM Mean CV (%)	0	Lobe Distribution Percentage (%) Epithelial Lining Fluid Volume RM	8.33	Membrane potential : Kidney (mV)	-60													Target14 Lambda (1/h)	0
	Abundance : UGT2B15 PM Freq	0.28	Abundance : CYP2D6 IM Mean	0	UGT1A9 EM Mean	1	SC lipids density CV (%) : Female	0	CYP3A4 Mean Turnover Rate	0.03	Lobe Distribution Percentage (%) Ventillation Rate RT	25.9	Membrane potential : Liver (mV)	-41													Target15 Name	Target 15
	Abundance : UGT2B15 UM Freq	0	Abundance : CYP2D6 IM CV (%)	0	UGT1A9 EM Mean CV (%)	50	SC proteins density (gm/cm3) : Male	1.37	CYP3A4 Mean Turnover Rate CV (%)	20	Lobe Distribution Percentage (%) Ventillation Rate RT	12.4	Membrane potential : Lung (mV)	-41													Target15 Rmax (µM)	0
	Abundance : UGT2B15 IM Freq	0.51	Turnover rate : CYP2D6 Mean	0.0099	UGT1A9 PM Mean	0.07	SC proteins density CV (%) : Male	0	Colon CYP3A4 EM Mean	1.99	Lobe Distribution Percentage (%) Ventillation Rate RT	14.8	Membrane potential : Muscle (mV)	-41													Target15 Rmax CV (%)	30
	Abundance : UGT2B17 PM Freq	0.09	Turnover rate : CYP2D6 CV (%)	56	UGT1A9 PM Mean CV (%)	50	SC proteins density (gm/cm3) : Female	1.37	Colon CYP3A4 EM CV (%)	30	Lobe Distribution Percentage (%) Ventillation Rate RT	32.1	Membrane potential : Skin (mV)	-41													Target15 Kdeg (1/h)	0
	Abundance : UGT2B17 UM Freq	0	Abundance : CYP2E1 EM Mean	61	UGT1A9 UM Mean	2.6	SC proteins density CV (%) : Female	0	Colon CYP3A4 PM Mean	N/A	Lobe Distribution Percentage (%) Ventillation Rate RT	14.8	Membrane potential : Spleen (mV)	-41													Target15 Kdeg CV (%)	30
	Abundance : UGT2B17 IM Freq	0.36	Abundance : CYP2E1 EM CV (%)	61	UGT1A9 UM Mean CV (%)	0	Intercellular lipid thickness of SC (µm) : Male	0.091	Colon CYP3A4 PM Mean CV (%)	N/A	Lobe Distribution Percentage (%) Ventillation Rate RT	100	Membrane potential : RBC (mV)	-10													Target15 Kshed (1/hr)	0
	Abundance : UGT2B28 PM Freq	0	Abundance : CYP2E1 PM Mean	0	UGT1A9 IM Mean	0.19	Intercellular lipid thickness of SC CV (%) : Male	0	Colon CYP3A4 UM Mean	N/A	Lobe Distribution Percentage (%) Ventillation Rate RT	100	Membrane potential : Pancreas (mV)	-41													Target15 Kshed CV (%)	30
	Abundance : UGT2B28 UM Freq	0	Abundance : CYP2E1 PM CV (%)	0	UGT1A9 IM Mean CV (%)	50	Intercellular lipid thickness of SC (µm) : Female	0.091	Colon CYP3A4 UM Mean CV (%)	N/A	Lobe Distribution Percentage (%) Blood Flow Rate RT	2.5	Ve (Fraction Tissue volume) : Lung	0.0050985													Target15 Lambda (1/h)	0
	Abundance : UGT2B28 IM Freq	0	Abundance : CYP2E1 UM Mean	0	UGT1A9 Absolute Abundance	79	Intercellular lipid thickness of SC CV (%) : Female	0	Colon CYP3A4 IM Mean	N/A	Lobe Distribution Percentage (%) Blood Flow Rate RT	11.8	Ve (Fraction Tissue volume) : Heart	0.001155													Target16 Name	Target 16
	Abundance : User UGT1 PM Freq	0	Abundance : CYP2E1 UM CV (%)	0	UGT1A9 Mean Turnover Rate	1e-06	Tortuosity of lipid diffusion pathway of SC : Male	12.7	Colon CYP3A4 IM Mean CV (%)	N/A	Lobe Distribution Percentage (%) Blood Flow Rate RT	8.6	Ve (Fraction Tissue volume) : Brain	0.0001375													Target16 Rmax (µM)	0
	Abundance : User UGT1 UM Freq	0	Abundance : CYP2E1 IM Mean	0	UGT1A9 Mean Turnover Rate CV (%)	30	Tortuosity of lipid diffusion pathway of SC CV (%) : Male	18	Colon CYP3A4 Mean Turnover Rate	N/A	Lobe Distribution Percentage (%) Blood Flow Rate RT	34.9	Ve (Fraction Tissue volume) : Muscle	0.001375													Target16 Rmax CV (%)	30
	Abundance : User UGT1 IM Freq	0	Abundance : CYP2E1 IM CV (%)	0	UGT1A10 EM Mean	1	Tortuosity of lipid diffusion pathway of SC : Female	12.7	Colon CYP3A4 Mean Turnover Rate CV (%)	N/A	Lobe Distribution Percentage (%) Blood Flow Rate RT	8.6	Ve (Fraction Tissue volume) : Skin	0.00275													Target16 Kdeg (1/h)	0
	Abundance : User Cyt1 PM Freq	0	Turnover rate : CYP2E1 Mean	0.0176	UGT1A10 EM Mean CV (%)	50	Tortuosity of lipid diffusion pathway of SC CV (%) : Female	18	CYP3A5 EM Mean	24.6	Lobe Distribution Percentage (%) Blood Flow Rate RT	5	Ve (Fraction Tissue volume) : Adipose	0.001925													Target16 Kdeg CV (%)	30
	Abundance : User Cyt1 UM Freq	0	Turnover rate : CYP2E1 CV (%)	63	UGT1A10 PM Mean	0	Hair follicle diameter (µm) : Male	65.4	CYP3A5 EM CV (%)	60	Lobe Distribution Percentage (%) Blood Flow Rate RT	2.5	Ve (Fraction Tissue volume) : Bone	0.001375													Target16 Kshed (1/hr)	0
	Abundance : User Cyt1 IM Freq	0	Abundance : CYP2J2 EM Mean	1.2	UGT1A10 PM Mean CV (%)	0	Hair follicle diameter CV (%) : Male	83	CYP3A5 PM Mean	0	Lobe Distribution Percentage (%) Alveoli Volume RT	26.3	Ve (Fraction Tissue volume) : Kidney	0.001925													Target16 Kshed CV (%)	30
	Abundance : User Cyt2 PM Freq	0	Abundance : CYP2J2 EM CV (%)	175	UGT1A10 UM Mean	0	Hair follicle diameter (µm) : Female	65.4	CYP3A5 PM Mean CV (%)	0	Lobe Distribution Percentage (%) Alveoli Volume RT	10.5	Ve (Fraction Tissue volume) : ByPass	0													Target16 Lambda (1/h)	0
	Abundance : User Cyt2 UM Freq	0	Abundance : CYP2J2 PM Mean	0	UGT1A10 UM Mean CV (%)	0	Hair follicle diameter CV (%) : Female	83	CYP3A5 UM Mean	0	Lobe Distribution Percentage (%) Alveoli Volume RT	15.8	Ve (Fraction Tissue volume) : Gut	0.001375													Target17 Name	Target 17
	Abundance : User Cyt2 IM Freq	0	Abundance : CYP2J2 PM CV (%)	0	UGT1A10 IM Mean	0	Hair follicle density (N/cm2) : Male	292	CYP3A5 UM Mean CV (%)	0	Lobe Distribution Percentage (%) Alveoli Volume RT	26.3	Ve (Fraction Tissue volume) : Spleen	0.001375													Target17 Rmax (µM)	0
	Abundance : User Cyt3 PM Freq	0	Abundance : CYP2J2 UM Mean	0	UGT1A10 IM Mean CV (%)	0	Hair follicle density CV (%) : Male	16	CYP3A5 IM Mean	0	Lobe Distribution Percentage (%) Alveoli Volume RT	21	Ve (Fraction Tissue volume) : Pancreas	0.001375													Target17 Rmax CV (%)	30
	Abundance : User Cyt3 UM Freq	0	Abundance : CYP2J2 UM CV (%)	0	UGT1A10 Absolute Abundance	17	Hair follicle density (N/cm2) : Female	292	CYP3A5 IM Mean CV (%)	0	Lobe Distribution Percentage (%) Alveoli Volume RT	50	Ve (Fraction Tissue volume) : Liver	0.001375													Target17 Kdeg (1/h)	0
	Abundance : User Cyt3 IM Freq	0	Abundance : CYP2J2 IM Mean	0	UGT1A10 Mean Turnover Rate	1e-06	Hair follicle density CV (%) : Female	16	CYP3A5 Mean Turnover Rate	0.03	Lobe Distribution Percentage (%) Alveoli Volume RT	50	Subcell Membrane potential : Adipose (mV)	10													Target17 Kdeg CV (%)	30
	Abundance : User Cyt4 PM Freq	0	Abundance : CYP2J2 IM CV (%)	0	UGT1A10 Mean Turnover Rate CV (%)	30	Hair shaft diameter (µm) : Male	15.9	CYP3A5 Mean Turnover Rate CV (%)	20	Lobe Distribution Percentage (%) Absorption Area RT	26.3	Subcell Membrane potential : Bone (mV)	10													Target17 Kshed (1/hr)	0
	Abundance : User Cyt4 UM Freq	0	Turnover rate : CYP2J2 Mean	0.0194	UGT2B4 EM Mean	1	Hair shaft diameter CV (%) : Male	57	Colon CYP3A5 EM Mean	0.74	Lobe Distribution Percentage (%) Absorption Area RT	10.5	Subcell Membrane potential : Brain (mV)	10													Target17 Kshed CV (%)	30
	Abundance : User Cyt4 IM Freq	0	Turnover rate : CYP2J2 CV (%)	56	UGT2B4 EM Mean CV (%)	50	Hair shaft diameter (µm) : Female	15.9	Colon CYP3A5 EM CV (%)	30	Lobe Distribution Percentage (%) Absorption Area RT	15.8	Subcell Membrane potential : Gut (mV)	10													Target17 Lambda (1/h)	0
	Abundance : CES1 PM Freq	0.001	Abundance : CYP3A4 EM Mean	137	UGT2B4 PM Mean	0	Hair shaft diameter CV (%) : Female	57	Colon CYP3A5 PM Mean	N/A	Lobe Distribution Percentage (%) Absorption Area RT	26.3	Subcell Membrane potential : Heart (mV)	10													Target18 Name	Target 18
	Abundance : CES1 UM Freq	0	Abundance : CYP3A4 EM CV (%)	41	UGT2B4 PM Mean CV (%)	0	Sebum viscosity (centipose) : Male	40	Colon CYP3A5 PM Mean CV (%)	N/A	Lobe Distribution Percentage (%) Absorption Area RT	21	Subcell Membrane potential : Kidney (mV)	10													Target18 Rmax (µM)	0
	Abundance : CES1 IM Freq	0	Abundance : CYP3A4 PM Mean	0	UGT2B4 UM Mean	0	Sebum viscosity CV (%) : Male	0	Colon CYP3A5 UM Mean	N/A	Lobe Distribution Percentage (%) Absorption Area RT	50	Subcell Membrane potential : Liver (mV)	10													Target18 Rmax CV (%)	30
	Abundance : CES2 PM Freq	0	Abundance : CYP3A4 PM CV (%)	0	UGT2B4 UM Mean CV (%)	0	Sebum viscosity (centipose) : Female	40	Colon CYP3A5 UM Mean CV (%)	N/A	Lobe Distribution Percentage (%) Absorption Area RT	50	Subcell Membrane potential : Lung (mV)	10													Target18 Kdeg (1/h)	0
	Abundance : CES2 UM Freq	0	Abundance : CYP3A4 UM Mean	0	UGT2B4 IM Mean	0	Sebum viscosity CV (%) : Female	0	Colon CYP3A5 IM Mean	N/A	Lobe Distribution Percentage (%) Pulmonary Capilliary Blood Volume RT	16.66	Subcell Membrane potential : Muscle (mV)	10													Target18 Kdeg CV (%)	30
	Abundance : CES2 IM Freq	0	Abundance : CYP3A4 UM CV (%)	0	UGT2B4 IM Mean CV (%)	0	Corneocyte pH [top] : Male	6.8	Colon CYP3A5 IM Mean CV (%)	N/A	Lobe Distribution Percentage (%) Pulmonary Capilliary Blood Volume RT	16.67	Subcell Membrane potential : Skin (mV)	10													Target18 Kshed (1/hr)	0
	Abundance : User ES PM Freq	0	Abundance : CYP3A4 IM Mean	0	UGT2B4 Absolute Abundance	0.3	Corneocyte pH [top] CV (%) : Male	0	Colon CYP3A5 Mean Turnover Rate	N/A	Lobe Distribution Percentage (%) Pulmonary Capilliary Blood Volume RT	16.67	Subcell Membrane potential : Spleen (mV)	10													Target18 Kshed CV (%)	30
	Abundance : User ES UM Freq	0	Abundance : CYP3A4 IM CV (%)	0	UGT2B4 Mean Turnover Rate	1e-06	Corneocyte pH [top] : Female	6.8	Colon CYP3A5 Mean Turnover Rate CV (%)	N/A	Lobe Distribution Percentage (%) Pulmonary Capilliary Blood Volume RT	16.67	Subcell Membrane potential : RBC (mV)	10													Target18 Lambda (1/h)	0
	Abundance : User ES IM Freq	0	Turnover rate : CYP3A4 Mean	0.0193	UGT2B4 Mean Turnover Rate CV (%)	30	Corneocyte pH [top] CV (%) : Female	0	UGT1A1 EM Mean	1	Lobe Distribution Percentage (%) Pulmonary Capilliary Blood Volume RT	16.67	Subcell Membrane potential : Pancreas (mV)	10													Target19 Name	Target 19
	Abundance : Plasma ES PM Freq	0	Turnover rate : CYP3A4 CV (%)	68	UGT2B7 EM Mean	1	Corneocyte thickness [top] (µm) : Male	0.71	UGT1A1 EM Mean CV (%)	60	Lobe Distribution Percentage (%) Pulmonary Capilliary Blood Volume RT	8.33	Local pH (IW) : Adipose	7													Target19 Rmax (µM)	0
	Abundance : Plasma ES UM Freq	0	Abundance : CYP3A5 EM Mean	103	UGT2B7 EM Mean CV (%)	50	Corneocyte thickness [top] CV (%) : Male	36	UGT1A1 PM Mean	0.42	Lobe Distribution Percentage (%) Pulmonary Capilliary Blood Volume RT	8.33	Local pH (IW) : Bone	7													Target19 Rmax CV (%)	30
	Abundance : Plasma ES IM Freq	0	Abundance : CYP3A5 EM CV (%)	65	UGT2B7 PM Mean	0	Corneocyte thickness [top] (µm) : Female	0.71	UGT1A1 PM Mean CV (%)	60	Lobe Distribution Percentage (%) Pulmonary Mass Volume RT	16.66	Local pH (IW) : Brain	7.12													Target19 Kdeg (1/h)	0
	Abundance : ABCB1 (P-gp/MDR1) PT Freq	0	Abundance : CYP3A5 PM Mean	0	UGT2B7 PM Mean CV (%)	0	Corneocyte thickness [top] CV (%) : Female	36	UGT1A1 UM Mean	1.46	Lobe Distribution Percentage (%) Pulmonary Mass Volume RT	16.67	Local pH (IW) : Gut	7													Target19 Kdeg CV (%)	30
	Abundance : ABCB1 (P-gp/MDR1) IT Freq	0	Abundance : CYP3A5 PM CV (%)	0	UGT2B7 UM Mean	0	Corneocyte width [top] (µm) : Male	27.7	UGT1A1 UM Mean CV (%)	60	Lobe Distribution Percentage (%) Pulmonary Mass Volume RT	16.67	Local pH (IW) : Heart	7													Target19 Kshed (1/hr)	0
	Abundance : ABCB1 (P-gp/MDR1) UT Freq	0	Abundance : CYP3A5 UM Mean	0	UGT2B7 UM Mean CV (%)	0	Corneocyte width [top] CV (%) : Male	9.2	UGT1A1 IM Mean	0.72	Lobe Distribution Percentage (%) Pulmonary Mass Volume RT	16.67	Local pH (IW) : Kidney	7.2													Target19 Kshed CV (%)	30
	Abundance : ABCB11 (BSEP) PT Freq	0	Abundance : CYP3A5 UM CV (%)	0	UGT2B7 IM Mean	0	Corneocyte width [top] (µm) : Female	27.7	UGT1A1 IM Mean CV (%)	60	Lobe Distribution Percentage (%) Pulmonary Mass Volume RT	16.67	Local pH (IW) : Liver	7													Target19 Lambda (1/h)	0
	Abundance : ABCB11 (BSEP) IT Freq	0	Abundance : CYP3A5 IM Mean	0	UGT2B7 IM Mean CV (%)	0	Corneocyte width [top] CV (%) : Female	9.2	UGT1A1 Absolute Abundance	8.5	Lobe Distribution Percentage (%) Pulmonary Mass Volume RT	8.33	Local pH (IW) : Lung	6.7													Target20 Name	Target 20
	Abundance : ABCB11 (BSEP) UT Freq	0	Abundance : CYP3A5 IM CV (%)	0	UGT2B7 Absolute Abundance	48	Corneocyte length [top] (µm) : Male	34.2	UGT1A3 EM Mean	1	Lobe Distribution Percentage (%) Pulmonary Mass Volume RT	8.33	Local pH (IW) : Muscle	7													Target20 Rmax (µM)	0
	Abundance : ABCC1 (MRP1) PT Freq	0	Turnover rate : CYP3A5 Mean	0.0193	UGT2B7 Mean Turnover Rate	1e-06	Corneocyte length [top] CV (%) : Male	4.1	UGT1A3 EM Mean CV (%)	60	Lobe Distribution Percentage (%) Epithelial Lining Fluid Volume RT	16.66	Local pH (IW) : Skin	7													Target20 Rmax CV (%)	30
	Abundance : ABCC1 (MRP1) IT Freq	0	Turnover rate : CYP3A5 CV (%)	68	UGT2B7 Mean Turnover Rate CV (%)	30	Corneocyte length [top] (µm) : Female	34.2	UGT1A3 PM Mean	0	Lobe Distribution Percentage (%) Epithelial Lining Fluid Volume RT	16.67	Local pH (IW) : Spleen	7													Target20 Kdeg (1/h)	0
	Abundance : ABCC1 (MRP1) UT Freq	0	Abundance : CYP3A7 EM Mean	35.4	UGT2B10 EM Mean	1	Corneocyte length [top] CV (%) : Female	4.1	UGT1A3 PM Mean CV (%)	0	Lobe Distribution Percentage (%) Epithelial Lining Fluid Volume RT	16.67	Local pH (IW) : RBC	7.22													Target20 Kdeg CV (%)	30
	Abundance : ABCC2 (MRP2) PT Freq	0	Abundance : CYP3A7 EM CV (%)	61	UGT2B10 EM Mean CV (%)	50	Hydration level (% water volume) [top] : Male	35.5	UGT1A3 UM Mean	0	Lobe Distribution Percentage (%) Epithelial Lining Fluid Volume RT	16.67	Local pH (IW) : Pancreas	7													Target20 Kshed (1/hr)	0
	Abundance : ABCC2 (MRP2) IT Freq	0	Abundance : CYP3A7 PM Mean	0	UGT2B10 PM Mean	0	Hydration level (% water volume) [top] CV (%) : Male	17	UGT1A3 UM Mean CV (%)	0	Lobe Distribution Percentage (%) Epithelial Lining Fluid Volume RT	16.67	Subcell pH : Adipose	5													Target20 Kshed CV (%)	30
	Abundance : ABCC2 (MRP2) UT Freq	0	Abundance : CYP3A7 PM CV (%)	0	UGT2B10 PM Mean CV (%)	0	Hydration level (% water volume) [top] : Female	35.5	UGT1A3 IM Mean	0	Lobe Distribution Percentage (%) Epithelial Lining Fluid Volume RT	8.33	Subcell pH : Bone	5													Target20 Lambda (1/h)	0
	Abundance : ABCC3 (MRP3) PT Freq	0	Abundance : CYP3A7 UM Mean	0	UGT2B10 UM Mean	0	Hydration level (% water volume) [top] CV (%) : Female	17	UGT1A3 IM Mean CV (%)	0	Lobe Distribution Percentage (%) Epithelial Lining Fluid Volume RT	8.33	Subcell pH : Brain	5
	Abundance : ABCC3 (MRP3) IT Freq	0	Abundance : CYP3A7 UM CV (%)	0	UGT2B10 UM Mean CV (%)	0	SC lipid viscosity [top] (centipose) : Male	75	UGT1A3 Absolute Abundance	0.4	Lobe Distribution Percentage (%) Ventillation Rate LL	25.9	Subcell pH : Gut	5
	Abundance : ABCC3 (MRP3) UT Freq	0	Abundance : CYP3A7 IM Mean	0	UGT2B10 IM Mean	0	SC lipid viscosity [top] CV (%) : Male	0	UGT1A4 EM Mean	1	Lobe Distribution Percentage (%) Ventillation Rate LL	12.4	Subcell pH : Heart	5
	Abundance : ABCC4 (MRP4) PT Freq	0	Abundance : CYP3A7 IM CV (%)	0	UGT2B10 IM Mean CV (%)	0	SC lipid viscosity [top] (centipose) : Female	75	UGT1A4 EM Mean CV (%)	60	Lobe Distribution Percentage (%) Ventillation Rate LL	14.8	Subcell pH : Kidney	5
	Abundance : ABCC4 (MRP4) IT Freq	0	Turnover rate : CYP3A7 Mean	0.019	UGT2B10 Absolute Abundance	0	SC lipid viscosity [top] CV (%) : Female	0	UGT1A4 PM Mean	0	Lobe Distribution Percentage (%) Ventillation Rate LL	32.1	Subcell pH : Liver	5
	Abundance : ABCC4 (MRP4) UT Freq	0	Turnover rate : CYP3A7 CV (%)	68	UGT2B10 Mean Turnover Rate	1e-06	Corneocyte pH [upper mid] : Male	6.8	UGT1A4 PM Mean CV (%)	0	Lobe Distribution Percentage (%) Ventillation Rate LL	14.8	Subcell pH : Lung	5
	Abundance : ABCC6 (MRP6) PT Freq	0	3A4 M / F difference	Same	UGT2B10 Mean Turnover Rate CV (%)	30	Corneocyte pH [upper mid] CV (%) : Male	0	UGT1A4 UM Mean	0	Lobe Distribution Percentage (%) Ventillation Rate LL	100	Subcell pH : Muscle	5
	Abundance : ABCC6 (MRP6) IT Freq	0	Abundance : 3A4 Mean : Male	137	UGT2B11 EM Mean	1	Corneocyte pH [upper mid] : Female	6.8	UGT1A4 UM Mean CV (%)	0	Lobe Distribution Percentage (%) Ventillation Rate LL	100	Subcell pH : Skin	5
	Abundance : ABCC6 (MRP6) UT Freq	0	Abundance : 3A4 CV (%) : Male	41	UGT2B11 EM Mean CV (%)	50	Corneocyte pH [upper mid] CV (%) : Female	0	UGT1A4 IM Mean	0	Lobe Distribution Percentage (%) Blood Flow Rate LL	2.5	Subcell pH : Spleen	5
	Abundance : ABCG2 (BCRP) PT Freq	0	Abundance : 3A4 Mean : Female	137	UGT2B11 PM Mean	0	Corneocyte thickness [upper mid] (µm) : Male	0.81	UGT1A4 IM Mean CV (%)	0	Lobe Distribution Percentage (%) Blood Flow Rate LL	11.8	Subcell pH : RBC	5
	Abundance : ABCG2 (BCRP) IT Freq	0	Abundance : 3A4 CV (%) : Female	41	UGT2B11 PM Mean CV (%)	0	Corneocyte thickness [upper mid] CV (%) : Male	36	UGT1A4 Absolute Abundance	1.9	Lobe Distribution Percentage (%) Blood Flow Rate LL	8.6	Subcell pH : Pancreas	5
	Abundance : ABCG2 (BCRP) UT Freq	0	Abundance : CYP2C9 Allelele 1 Genotype 1 Mean	83.4	UGT2B11 UM Mean	0	Corneocyte thickness [upper mid] (µm) : Female	0.81	UGT1A5 EM Mean	1	Lobe Distribution Percentage (%) Blood Flow Rate LL	34.9	Local pH : Plasma	7.4
	Abundance : SLC2A2 (GLUT2) PT Freq	0	Abundance : CYP2C9 Allelele 1 Genotype 1 CV (%)	60.5	UGT2B11 UM Mean CV (%)	0	Corneocyte thickness [upper mid] CV (%) : Female	36	UGT1A5 EM Mean CV (%)	60	Lobe Distribution Percentage (%) Blood Flow Rate LL	8.6	Local pH : EW	7.4
	Abundance : SLC2A2 (GLUT2) IT Freq	0	Turnover rate : CYP2C9 Allelele 1 Genotype 1 Mean	0.0067	UGT2B11 IM Mean	0	Corneocyte width [upper mid] (µm) : Male	27.7	UGT1A5 PM Mean	0	Lobe Distribution Percentage (%) Blood Flow Rate LL	5	Local pH : Generic IW	7
	Abundance : SLC2A2 (GLUT2) UT Freq	0	Turnover rate : CYP2C9 Allelele 1 Genotype 1 CV (%)	56	UGT2B11 IM Mean CV (%)	0	Corneocyte width [upper mid] CV (%) : Male	9.2	UGT1A5 PM Mean CV (%)	0	Lobe Distribution Percentage (%) Blood Flow Rate LL	2.5	Local pH : Gut ISF	7.23
	Abundance : SLC9A1 (ENT1) PT Freq	0	Abundance : CYP2C9 Allelele 1 Genotype 2 Mean	75.8	UGT2B11 Absolute Abundance	0	Corneocyte width [upper mid] (µm) : Female	27.7	UGT1A5 UM Mean	0	Lobe Distribution Percentage (%) Alveoli Volume LL	26.3	Local pH : CSF	7.31
	Abundance : SLC9A1 (ENT1) IT Freq	0	Abundance : CYP2C9 Allelele 1 Genotype 2 CV (%)	63.8	UGT2B11 Mean Turnover Rate	1e-06	Corneocyte width [upper mid] CV (%) : Female	9.2	UGT1A5 UM Mean CV (%)	0	Lobe Distribution Percentage (%) Alveoli Volume LL	10.5	Local pH : Pulmonary Fluid	6.6
	Abundance : SLC9A1 (ENT1) UT Freq	0	Turnover rate : CYP2C9 Allelele 1 Genotype 2 Mean	0.0067	UGT2B11 Mean Turnover Rate CV (%)	30	Corneocyte length [upper mid] (µm) : Male	34.2	UGT1A5 IM Mean	0	Lobe Distribution Percentage (%) Alveoli Volume LL	15.8	Subcell fraction : Adipose(%)	0
	Abundance : SLC9A2 (ENT2) PT Freq	0	Turnover rate : CYP2C9 Allelele 1 Genotype 2 CV (%)	56	UGT2B15 EM Mean	1	Corneocyte length [upper mid] CV (%) : Male	4.1	UGT1A5 IM Mean CV (%)	0	Lobe Distribution Percentage (%) Alveoli Volume LL	26.3	Subcell fraction : Bone(%)	0
	Abundance : SLC9A2 (ENT2) IT Freq	0	Abundance : CYP2C9 Allelele 1 Genotype 3 Mean	75.8	UGT2B15 EM Mean CV (%)	50	Corneocyte length [upper mid] (µm) : Female	34.2	UGT1A5 Absolute Abundance	0.3	Lobe Distribution Percentage (%) Alveoli Volume LL	21	Subcell fraction : Brain(%)	0
	Abundance : SLC9A2 (ENT2) UT Freq	0	Abundance : CYP2C9 Allelele 1 Genotype 3 CV (%)	63.8	UGT2B15 PM Mean	0.07	Corneocyte length [upper mid] CV (%) : Female	4.1	UGT1A6 EM Mean	1	Lobe Distribution Percentage (%) Alveoli Volume LL	50	Subcell fraction : Gut(%)	0
	Abundance : SLC10A1 (NTCP) PT Freq	0	Turnover rate : CYP2C9 Allelele 1 Genotype 3 Mean	0.0067	UGT2B15 PM Mean CV (%)	50	Hydration level (% water volume) [upper mid] : Male	46.1	UGT1A6 EM Mean CV (%)	60	Lobe Distribution Percentage (%) Alveoli Volume LL	50	Subcell fraction : Heart(%)	0
	Abundance : SLC10A1 (NTCP) IT Freq	0	Turnover rate : CYP2C9 Allelele 1 Genotype 3 CV (%)	56	UGT2B15 UM Mean	0	Hydration level (% water volume) [upper mid] CV (%) : Male	11	UGT1A6 PM Mean	0	Lobe Distribution Percentage (%) Absorption Area LL	26.3	Subcell fraction : Kidney(%)	1
	Abundance : SLC10A1 (NTCP) UT Freq	0	Abundance : CYP2C9 Allelele 1 Genotype 4 Mean	75.8	UGT2B15 UM Mean CV (%)	0	Hydration level (% water volume) [upper mid] : Female	46.1	UGT1A6 PM Mean CV (%)	0	Lobe Distribution Percentage (%) Absorption Area LL	10.5	Subcell fraction : Liver(%)	1
	Abundance : SLC10A2 (ASBT/IBAT) PT Freq	0	Abundance : CYP2C9 Allelele 1 Genotype 4 CV (%)	63.8	UGT2B15 IM Mean	0.47	Hydration level (% water volume) [upper mid] CV (%) : Female	11	UGT1A6 UM Mean	0	Lobe Distribution Percentage (%) Absorption Area LL	15.8	Subcell fraction : Lung(%)	1
	Abundance : SLC10A2 (ASBT/IBAT) IT Freq	0	Turnover rate : CYP2C9 Allelele 1 Genotype 4 Mean	0.0067	UGT2B15 IM Mean CV (%)	50	SC lipid viscosity [upper mid] (centipose) : Male	75	UGT1A6 UM Mean CV (%)	0	Lobe Distribution Percentage (%) Absorption Area LL	26.3	Subcell fraction : Muscle(%)	0
	Abundance : SLC10A2 (ASBT/IBAT) UT Freq	0	Turnover rate : CYP2C9 Allelele 1 Genotype 4 CV (%)	56	UGT2B15 Absolute Abundance	0.2	SC lipid viscosity [upper mid] CV (%) : Male	0	UGT1A6 IM Mean	0	Lobe Distribution Percentage (%) Absorption Area LL	21	Subcell fraction : Skin(%)	0
	Abundance : SLC15A1 (PEPT1) PT Freq	0	Abundance : CYP2C9 Allelele 1 Genotype 5 Mean	75.8	UGT2B15 Mean Turnover Rate	1e-06	SC lipid viscosity [upper mid] (centipose) : Female	75	UGT1A6 IM Mean CV (%)	0	Lobe Distribution Percentage (%) Absorption Area LL	50	Subcell fraction : Spleen(%)	0
	Abundance : SLC15A1 (PEPT1) IT Freq	0	Abundance : CYP2C9 Allelele 1 Genotype 5 CV (%)	63.8	UGT2B15 Mean Turnover Rate CV (%)	30	SC lipid viscosity [upper mid] CV (%) : Female	0	UGT1A6 Absolute Abundance	1.3	Lobe Distribution Percentage (%) Absorption Area LL	50	Subcell fraction : Pancreas(%)	0
	Abundance : SLC15A1 (PEPT1) UT Freq	0	Turnover rate : CYP2C9 Allelele 1 Genotype 5 Mean	0.0067	UGT2B17 EM Mean	1	Corneocyte pH [lower mid] : Male	6.8	UGT1A7 EM Mean	1	Lobe Distribution Percentage (%) Pulmonary Capilliary Blood Volume LL	16.66	Liver model	PerMCL
	Abundance : SLC16A1 (MCT1) PT Freq	0	Turnover rate : CYP2C9 Allelele 1 Genotype 5 CV (%)	56	UGT2B17 EM Mean CV (%)	50	Corneocyte pH [lower mid] CV (%) : Male	0	UGT1A7 EM Mean CV (%)	60	Lobe Distribution Percentage (%) Pulmonary Capilliary Blood Volume LL	16.67	Liver : 1 VS (%)	5
	Abundance : SLC16A1 (MCT1) IT Freq	0	Abundance : CYP2C9 Allelele 1 Genotype 6 Mean	23	UGT2B17 PM Mean	0.08	Corneocyte pH [lower mid] : Female	6.8	UGT1A7 PM Mean	0	Lobe Distribution Percentage (%) Pulmonary Capilliary Blood Volume LL	16.67	Liver : 1 EW (%)	16.5
	Abundance : SLC16A1 (MCT1) UT Freq	0	Abundance : CYP2C9 Allelele 1 Genotype 6 CV (%)	60	UGT2B17 PM Mean CV (%)	50	Corneocyte pH [lower mid] CV (%) : Female	0	UGT1A7 PM Mean CV (%)	0	Lobe Distribution Percentage (%) Pulmonary Capilliary Blood Volume LL	16.67	Liver : 1 NL (%)	3.48
	Abundance : SLCO1B1 (OATP1B1) PT Freq	0.02	Turnover rate : CYP2C9 Allelele 1 Genotype 6 Mean	0.0067	UGT2B17 UM Mean	0	Corneocyte thickness [lower mid] (µm) : Male	0.91	UGT1A7 UM Mean	0	Lobe Distribution Percentage (%) Pulmonary Capilliary Blood Volume LL	16.67	Liver : 1 NP (%)	2.52
	Abundance : SLCO1B1 (OATP1B1) IT Freq	0.27	Turnover rate : CYP2C9 Allelele 1 Genotype 6 CV (%)	56	UGT2B17 UM Mean CV (%)	0	Corneocyte thickness [lower mid] CV (%) : Male	36	UGT1A7 UM Mean CV (%)	0	Lobe Distribution Percentage (%) Pulmonary Capilliary Blood Volume LL	8.33	Liver : 1 IW (%)	58.6
	Abundance : SLCO1B1 (OATP1B1) UT Freq	0.07	Abundance : UGT1A1 EM Mean	1	UGT2B17 IM Mean	0.16	Corneocyte thickness [lower mid] (µm) : Female	0.91	UGT1A7 IM Mean	0	Lobe Distribution Percentage (%) Pulmonary Capilliary Blood Volume LL	8.33	Liver : 1 AP (mg/g)	5.09
	Abundance : SLCO1B3 (OATP1B3) PT Freq	0	Abundance : UGT1A1 EM CV (%)	24	UGT2B17 IM Mean CV (%)	50	Corneocyte thickness [lower mid] CV (%) : Female	36	UGT1A7 IM Mean CV (%)	0	Lobe Distribution Percentage (%) Pulmonary Mass Volume LL	16.66	Liver : 1 KpALB	0.086
	Abundance : SLCO1B3 (OATP1B3) IT Freq	0	Abundance : UGT1A1 PM Mean	0.42	UGT2B17 Absolute Abundance	0	Corneocyte width [lower mid] (µm) : Male	27.7	UGT1A7 Absolute Abundance	7.1	Lobe Distribution Percentage (%) Pulmonary Mass Volume LL	16.67	Liver : 1 KpLPP	0.161
	Abundance : SLCO1B3 (OATP1B3) UT Freq	0	Abundance : UGT1A1 PM CV (%)	50.8	UGT2B17 Mean Turnover Rate	1e-06	Corneocyte width [lower mid] CV (%) : Male	9.2	UGT1A8 EM Mean	1	Lobe Distribution Percentage (%) Pulmonary Mass Volume LL	16.67	Liver : 1 Local pH (IW)	7
	Abundance : SLCO2B1 (OATP2B1) PT Freq	0	Abundance : UGT1A1 UM Mean	1.46	UGT2B17 Mean Turnover Rate CV (%)	30	Corneocyte width [lower mid] (µm) : Female	27.7	UGT1A8 EM Mean CV (%)	60	Lobe Distribution Percentage (%) Pulmonary Mass Volume LL	16.67	Liver : 1 Local pH (EW)	7.4
	Abundance : SLCO2B1 (OATP2B1) IT Freq	0	Abundance : UGT1A1 UM CV (%)	30	UGT2B28 EM Mean	1	Corneocyte width [lower mid] CV (%) : Female	9.2	UGT1A8 PM Mean	0	Lobe Distribution Percentage (%) Pulmonary Mass Volume LL	16.67	Liver : 2 VS (%)	5
	Abundance : SLCO2B1 (OATP2B1) UT Freq	0	Abundance : UGT1A1 IM Mean	0.72	UGT2B28 EM Mean CV (%)	50	Corneocyte length [lower mid] (µm) : Male	34.2	UGT1A8 PM Mean CV (%)	0	Lobe Distribution Percentage (%) Pulmonary Mass Volume LL	8.33	Liver : 2 EW (%)	16.5
	Abundance : SLCO4C1 (OATP4C1) PT Freq	0	Abundance : UGT1A1 IM CV (%)	39.9	UGT2B28 PM Mean	0	Corneocyte length [lower mid] CV (%) : Male	4.1	UGT1A8 UM Mean	0	Lobe Distribution Percentage (%) Pulmonary Mass Volume LL	8.33	Liver : 2 NL (%)	3.48
	Abundance : SLCO4C1 (OATP4C1) IT Freq	0	Absolute Abundance : UGT1A1	48	UGT2B28 PM Mean CV (%)	0	Corneocyte length [lower mid] (µm) : Female	34.2	UGT1A8 UM Mean CV (%)	0	Lobe Distribution Percentage (%) Epithelial Lining Fluid Volume LL	16.66	Liver : 2 NP (%)	2.52
	Abundance : SLCO4C1 (OATP4C1) UT Freq	0	Turnover rate : UGT1A1 Mean	0.0578	UGT2B28 UM Mean	0	Corneocyte length [lower mid] CV (%) : Female	4.1	UGT1A8 IM Mean	0	Lobe Distribution Percentage (%) Epithelial Lining Fluid Volume LL	16.67	Liver : 2 IW (%)	58.6
	Abundance : SLC22A1 (OCT1) PT Freq	0	Turnover rate : UGT1A1 CV (%)	30	UGT2B28 UM Mean CV (%)	0	Hydration level (% water volume) [lower mid] : Male	56.75	UGT1A8 IM Mean CV (%)	0	Lobe Distribution Percentage (%) Epithelial Lining Fluid Volume LL	16.67	Liver : 2 AP (mg/g)	5.09
	Abundance : SLC22A1 (OCT1) IT Freq	0	Abundance : UGT1A3 EM Mean	1	UGT2B28 IM Mean	0	Hydration level (% water volume) [lower mid] CV (%) : Male	7	UGT1A8 Absolute Abundance	5.6	Lobe Distribution Percentage (%) Epithelial Lining Fluid Volume LL	16.67	Liver : 2 KpALB	0.086
	Abundance : SLC22A1 (OCT1) UT Freq	0	Abundance : UGT1A3 EM CV (%)	36	UGT2B28 IM Mean CV (%)	0	Hydration level (% water volume) [lower mid] : Female	56.75	UGT1A9 EM Mean	1	Lobe Distribution Percentage (%) Epithelial Lining Fluid Volume LL	16.67	Liver : 2 KpLPP	0.161
	Abundance : SLC22A2 (OCT2) PT Freq	0	Abundance : UGT1A3 PM Mean	0	UGT2B28 Absolute Abundance	0	Hydration level (% water volume) [lower mid] CV (%) : Female	7	UGT1A9 EM Mean CV (%)	60	Lobe Distribution Percentage (%) Epithelial Lining Fluid Volume LL	8.33	Liver : 2 Local pH (IW)	7
	Abundance : SLC22A2 (OCT2) IT Freq	0	Abundance : UGT1A3 PM CV (%)	0	UGT2B28 Mean Turnover Rate	1e-06	SC lipid viscosity [lower mid] (centipose) : Male	75	UGT1A9 PM Mean	0.07	Lobe Distribution Percentage (%) Epithelial Lining Fluid Volume LL	8.33	Liver : 2 Local pH (EW)	7.4
	Abundance : SLC22A2 (OCT2) UT Freq	0	Abundance : UGT1A3 UM Mean	0	UGT2B28 Mean Turnover Rate CV (%)	30	SC lipid viscosity [lower mid] CV (%) : Male	0	UGT1A9 PM Mean CV (%)	60	Lobe Distribution Percentage (%) Ventillation Rate LT	25.9	Liver : 3 VS (%)	5
	Abundance : SLC22A3 (OCT3) PT Freq	0	Abundance : UGT1A3 UM CV (%)	0	Use User UGT Option	Yes	SC lipid viscosity [lower mid] (centipose) : Female	75	UGT1A9 UM Mean	0	Lobe Distribution Percentage (%) Ventillation Rate LT	12.4	Liver : 3 EW (%)	16.5
	Abundance : SLC22A3 (OCT3) IT Freq	0	Abundance : UGT1A3 IM Mean	0	UGT User	1	SC lipid viscosity [lower mid] CV (%) : Female	0	UGT1A9 UM Mean CV (%)	0	Lobe Distribution Percentage (%) Ventillation Rate LT	14.8	Liver : 3 NL (%)	3.48
	Abundance : SLC22A3 (OCT3) UT Freq	0	Abundance : UGT1A3 IM CV (%)	0	User UGT1 EM Mean	1	Corneocyte pH [bottom] : Male	6.8	UGT1A9 IM Mean	0.19	Lobe Distribution Percentage (%) Ventillation Rate LT	32.1	Liver : 3 NP (%)	2.52
	Abundance : SLC22A4 (OCTN1) PT Freq	0	Absolute Abundance : UGT1A3	23	User UGT1 EM Mean CV (%)	50	Corneocyte pH [bottom] CV (%) : Male	0	UGT1A9 IM Mean CV (%)	60	Lobe Distribution Percentage (%) Ventillation Rate LT	14.8	Liver : 3 IW (%)	58.6
	Abundance : SLC22A4 (OCTN1) IT Freq	0	Turnover rate : UGT1A3 Mean	1e-06	User UGT1 PM Mean	0	Corneocyte pH [bottom] : Female	6.8	UGT1A9 Absolute Abundance	5.9	Lobe Distribution Percentage (%) Ventillation Rate LT	100	Liver : 3 AP (mg/g)	5.09
	Abundance : SLC22A4 (OCTN1) UT Freq	0	Turnover rate : UGT1A3 CV (%)	30	User UGT1 PM Mean CV (%)	0	Corneocyte pH [bottom] CV (%) : Female	0	UGT1A10 EM Mean	1	Lobe Distribution Percentage (%) Ventillation Rate LT	100	Liver : 3 KpALB	0.086
	Abundance : SLC22A6 (OAT1) PT Freq	0	Abundance : UGT1A4 EM Mean	1	User UGT1 UM Mean	0	Corneocyte thickness [bottom] (µm) : Male	1.03	UGT1A10 EM Mean CV (%)	60	Lobe Distribution Percentage (%) Blood Flow Rate LT	2.5	Liver : 3 KpLPP	0.161
	Abundance : SLC22A6 (OAT1) IT Freq	0	Abundance : UGT1A4 EM CV (%)	26	User UGT1 UM Mean CV (%)	0	Corneocyte thickness [bottom] CV (%) : Male	36	UGT1A10 PM Mean	0	Lobe Distribution Percentage (%) Blood Flow Rate LT	11.8	Liver : 3 Local pH (IW)	7
	Abundance : SLC22A6 (OAT1) UT Freq	0	Abundance : UGT1A4 PM Mean	0	User UGT1 IM Mean	0	Corneocyte thickness [bottom] (µm) : Female	1.03	UGT1A10 PM Mean CV (%)	0	Lobe Distribution Percentage (%) Blood Flow Rate LT	8.6	Liver : 3 Local pH (EW)	7.4
	Abundance : SLC22A7 (OAT2) PT Freq	0	Abundance : UGT1A4 PM CV (%)	0	User UGT1 IM Mean CV (%)	0	Corneocyte thickness [bottom] CV (%) : Female	36	UGT1A10 UM Mean	0	Lobe Distribution Percentage (%) Blood Flow Rate LT	34.9	Liver : 4 VS (%)	5
	Abundance : SLC22A7 (OAT2) IT Freq	0	Abundance : UGT1A4 UM Mean	0	User UGT1 Absolute Abundance	0	Corneocyte width [bottom] (µm) : Male	27.7	UGT1A10 UM Mean CV (%)	0	Lobe Distribution Percentage (%) Blood Flow Rate LT	8.6	Liver : 4 EW (%)	16.5
	Abundance : SLC22A7 (OAT2) UT Freq	0	Abundance : UGT1A4 UM CV (%)	0	User UGT1 Mean Turnover Rate	1e-06	Corneocyte width [bottom] CV (%) : Male	9.2	UGT1A10 IM Mean	0	Lobe Distribution Percentage (%) Blood Flow Rate LT	5	Liver : 4 NL (%)	3.48
	Abundance : SLC22A8 (OAT3) PT Freq	0	Abundance : UGT1A4 IM Mean	0	User UGT1 Mean Turnover Rate CV (%)	30	Corneocyte width [bottom] (µm) : Female	27.7	UGT1A10 IM Mean CV (%)	0	Lobe Distribution Percentage (%) Blood Flow Rate LT	2.5	Liver : 4 NP (%)	2.52
	Abundance : SLC22A8 (OAT3) IT Freq	0	Abundance : UGT1A4 IM CV (%)	0	Use User Cytosolic Enzyme Option	Yes	Corneocyte width [bottom] CV (%) : Female	9.2	UGT1A10 Absolute Abundance	4.3	Lobe Distribution Percentage (%) Alveoli Volume LT	26.3	Liver : 4 IW (%)	58.6
	Abundance : SLC22A8 (OAT3) UT Freq	0	Absolute Abundance : UGT1A4	52	User Cyt	1	Corneocyte length [bottom] (µm) : Male	34.2	UGT2B4 EM Mean	1	Lobe Distribution Percentage (%) Alveoli Volume LT	10.5	Liver : 4 AP (mg/g)	5.09
	Abundance : SLC22A9 (OAT7) PT Freq	0	Turnover rate : UGT1A4 Mean	1e-06	User Cyt1 EM Mean	1	Corneocyte length [bottom] CV (%) : Male	4.1	UGT2B4 EM Mean CV (%)	60	Lobe Distribution Percentage (%) Alveoli Volume LT	15.8	Liver : 4 KpALB	0.086
	Abundance : SLC22A9 (OAT7) IT Freq	0	Turnover rate : UGT1A4 CV (%)	30	User Cyt1 EM Mean CV (%)	30	Corneocyte length [bottom] (µm) : Female	34.2	UGT2B4 PM Mean	0	Lobe Distribution Percentage (%) Alveoli Volume LT	26.3	Liver : 4 KpLPP	0.161
	Abundance : SLC22A9 (OAT7) UT Freq	0	Abundance : UGT1A5 EM Mean	1	User Cyt1 PM Mean	0	Corneocyte length [bottom] CV (%) : Female	4.1	UGT2B4 PM Mean CV (%)	0	Lobe Distribution Percentage (%) Alveoli Volume LT	21	Liver : 4 Local pH (IW)	7
	Abundance : SLC47A1 (MATE1) PT Freq	0	Abundance : UGT1A5 EM CV (%)	30	User Cyt1 PM Mean CV (%)	0	Hydration level (% water volume) [bottom] : Male	67.4	UGT2B4 UM Mean	0	Lobe Distribution Percentage (%) Alveoli Volume LT	50	Liver : 4 Local pH (EW)	7.4
	Abundance : SLC47A1 (MATE1) IT Freq	0	Abundance : UGT1A5 PM Mean	0	User Cyt1 UM Mean	0	Hydration level (% water volume) [bottom] CV (%) : Male	4	UGT2B4 UM Mean CV (%)	0	Lobe Distribution Percentage (%) Alveoli Volume LT	50	Liver : 5 VS (%)	5
	Abundance : SLC47A1 (MATE1) UT Freq	0	Abundance : UGT1A5 PM CV (%)	0	User Cyt1 UM Mean CV (%)	0	Hydration level (% water volume) [bottom] : Female	67.4	UGT2B4 IM Mean	0	Lobe Distribution Percentage (%) Absorption Area LT	26.3	Liver : 5 EW (%)	16.5
	Abundance : SLC47As (MATEs) PT Freq	0	Abundance : UGT1A5 UM Mean	0	User Cyt1 IM Mean	0	Hydration level (% water volume) [bottom] CV (%) : Female	4	UGT2B4 IM Mean CV (%)	0	Lobe Distribution Percentage (%) Absorption Area LT	10.5	Liver : 5 NL (%)	3.48
	Abundance : SLC47As (MATEs) IT Freq	0	Abundance : UGT1A5 UM CV (%)	0	User Cyt1 IM Mean CV (%)	0	SC lipid viscosity [bottom] (centipose) : Male	75	UGT2B4 Absolute Abundance	0	Lobe Distribution Percentage (%) Absorption Area LT	15.8	Liver : 5 NP (%)	2.52
	Abundance : SLC47As (MATEs) UT Freq	0	Abundance : UGT1A5 IM Mean	0	Use User Cytosolic Enzyme Option	Yes	SC lipid viscosity [bottom] CV (%) : Male	0	UGT2B7 EM Mean	1	Lobe Distribution Percentage (%) Absorption Area LT	26.3	Liver : 5 IW (%)	58.6
	Abundance : SLC51A/B (OST-α/β) PT Freq	0	Abundance : UGT1A5 IM CV (%)	0	User Cyt	2	SC lipid viscosity [bottom] (centipose) : Female	75	UGT2B7 EM Mean CV (%)	60	Lobe Distribution Percentage (%) Absorption Area LT	21	Liver : 5 AP (mg/g)	5.09
	Abundance : SLC51A/B (OST-α/β) IT Freq	0	Absolute Abundance : UGT1A5	0	User Cyt2 EM Mean	1	SC lipid viscosity [bottom] CV (%) : Female	0	UGT2B7 PM Mean	0	Lobe Distribution Percentage (%) Absorption Area LT	50	Liver : 5 KpALB	0.086
	Abundance : SLC51A/B (OST-α/β) UT Freq	0	Turnover rate : UGT1A5 Mean	1e-06	User Cyt2 EM Mean CV (%)	30	Viable Epidermis thickness (µm) : Male	50.05	UGT2B7 PM Mean CV (%)	0	Lobe Distribution Percentage (%) Absorption Area LT	50	Liver : 5 KpLPP	0.161
	Abundance : Apical Influx (Intestine) PT Freq	0	Turnover rate : UGT1A5 CV (%)	30	User Cyt2 PM Mean	0	Viable Epidermis thickness CV (%) : Male	7	UGT2B7 UM Mean	0	Lobe Distribution Percentage (%) Pulmonary Capilliary Blood Volume LT	16.66	Liver : 5 Local pH (IW)	7
	Abundance : Apical Influx (Intestine) IT Freq	0	Abundance : UGT1A6 EM Mean	1	User Cyt2 PM Mean CV (%)	0	Viable Epidermis thickness (µm) : Female	50.05	UGT2B7 UM Mean CV (%)	0	Lobe Distribution Percentage (%) Pulmonary Capilliary Blood Volume LT	16.67	Liver : 5 Local pH (EW)	7.4
	Abundance : Apical Influx (Intestine) UT Freq	0	Abundance : UGT1A6 EM CV (%)	30	User Cyt2 UM Mean	0	Viable Epidermis thickness CV (%) : Female	7	UGT2B7 IM Mean	0	Lobe Distribution Percentage (%) Pulmonary Capilliary Blood Volume LT	16.67	Liver : 6 VS (%)	5
	Abundance : Apical Efflux (Intestine) PT Freq	0	Abundance : UGT1A6 PM Mean	0	User Cyt2 UM Mean CV (%)	0	Dermis thickness (µm) : Male	1250	UGT2B7 IM Mean CV (%)	0	Lobe Distribution Percentage (%) Pulmonary Capilliary Blood Volume LT	16.67	Liver : 6 EW (%)	16.5
	Abundance : Apical Efflux (Intestine) IT Freq	0	Abundance : UGT1A6 PM CV (%)	0	User Cyt2 IM Mean	0	Dermis thickness CV (%) : Male	45	UGT2B7 Absolute Abundance	4.5	Lobe Distribution Percentage (%) Pulmonary Capilliary Blood Volume LT	16.67	Liver : 6 NL (%)	3.48
	Abundance : Apical Efflux (Intestine) UT Freq	0	Abundance : UGT1A6 UM Mean	0	User Cyt2 IM Mean CV (%)	0	Dermis thickness (µm) : Female	1250	UGT2B10 EM Mean	1	Lobe Distribution Percentage (%) Pulmonary Capilliary Blood Volume LT	8.33	Liver : 6 NP (%)	2.52
	Abundance : Sinusoidal Uptake (Liver) PT Freq	0	Abundance : UGT1A6 UM CV (%)	0	Use User Cytosolic Enzyme Option	Yes	Dermis thickness CV (%) : Female	45	UGT2B10 EM Mean CV (%)	60	Lobe Distribution Percentage (%) Pulmonary Capilliary Blood Volume LT	8.33	Liver : 6 IW (%)	58.6
	Abundance : Sinusoidal Uptake (Liver) IT Freq	0	Abundance : UGT1A6 IM Mean	0	User Cyt	3	Subcutis thickness (mm) : Male	1.9	UGT2B10 PM Mean	0	Lobe Distribution Percentage (%) Pulmonary Mass Volume LT	16.66	Liver : 6 AP (mg/g)	5.09
	Abundance : Sinusoidal Uptake (Liver) UT Freq	0	Abundance : UGT1A6 IM CV (%)	0	User Cyt3 EM Mean	1	Subcutis thickness CV (%) : Male	55.72	UGT2B10 PM Mean CV (%)	0	Lobe Distribution Percentage (%) Pulmonary Mass Volume LT	16.67	Liver : 6 KpALB	0.086
	Abundance : Sinusoidal Efflux (Liver) PT Freq	0	Absolute Abundance : UGT1A6	20	User Cyt3 EM Mean CV (%)	30	Subcutis thickness (mm) : Female	1.91	UGT2B10 UM Mean	0	Lobe Distribution Percentage (%) Pulmonary Mass Volume LT	16.67	Liver : 6 KpLPP	0.161
	Abundance : Sinusoidal Efflux (Liver) IT Freq	0	Turnover rate : UGT1A6 Mean	1e-06	User Cyt3 PM Mean	0	Subcutis thickness CV (%) : Female	55.72	UGT2B10 UM Mean CV (%)	0	Lobe Distribution Percentage (%) Pulmonary Mass Volume LT	16.67	Liver : 6 Local pH (IW)	7
	Abundance : Sinusoidal Efflux (Liver) UT Freq	0	Turnover rate : UGT1A6 CV (%)	30	User Cyt3 PM Mean CV (%)	0	Muscle thickness (mm) : Male	1.46	UGT2B10 IM Mean	0	Lobe Distribution Percentage (%) Pulmonary Mass Volume LT	16.67	Liver : 6 Local pH (EW)	7.4
	Abundance : Canalicular Efflux (Liver) PT Freq	0	Abundance : UGT1A7 EM Mean	1	User Cyt3 UM Mean	0	Muscle thickness CV (%) : Male	2.74	UGT2B10 IM Mean CV (%)	0	Lobe Distribution Percentage (%) Pulmonary Mass Volume LT	8.33
	Abundance : Canalicular Efflux (Liver) IT Freq	0	Abundance : UGT1A7 EM CV (%)	30	User Cyt3 UM Mean CV (%)	0	Muscle thickness (mm) : Female	1.37	UGT2B10 Absolute Abundance	0.1	Lobe Distribution Percentage (%) Pulmonary Mass Volume LT	8.33
	Abundance : Canalicular Efflux (Liver) UT Freq	0	Abundance : UGT1A7 PM Mean	0	User Cyt3 IM Mean	0	Muscle thickness CV (%) : Female	4.38	UGT2B11 EM Mean	1	Lobe Distribution Percentage (%) Epithelial Lining Fluid Volume LT	16.66
	Abundance : Apical Influx (Kidney) PT Freq	0	Abundance : UGT1A7 PM CV (%)	0	User Cyt3 IM Mean CV (%)	0	Dermis regional blood flow scalar : Male	2.13	UGT2B11 EM Mean CV (%)	60	Lobe Distribution Percentage (%) Epithelial Lining Fluid Volume LT	16.67
	Abundance : Apical Influx (Kidney) IT Freq	0	Abundance : UGT1A7 UM Mean	0	Use User Cytosolic Enzyme Option	Yes	Dermis regional blood flow scalar CV (%) : Male	0	UGT2B11 PM Mean	0	Lobe Distribution Percentage (%) Epithelial Lining Fluid Volume LT	16.67
	Abundance : Apical Influx (Kidney) UT Freq	0	Abundance : UGT1A7 UM CV (%)	0	User Cyt	4	Dermis regional blood flow scalar : Female	2.13	UGT2B11 PM Mean CV (%)	0	Lobe Distribution Percentage (%) Epithelial Lining Fluid Volume LT	16.67
	Abundance : Basolateral Efflux (Kidney) PT Freq	0	Abundance : UGT1A7 IM Mean	0	User Cyt4 EM Mean	1	Dermis regional blood flow scalar CV (%) : Female	0	UGT2B11 UM Mean	0	Lobe Distribution Percentage (%) Epithelial Lining Fluid Volume LT	16.67
	Abundance : Basolateral Efflux (Kidney) IT Freq	0	Abundance : UGT1A7 IM CV (%)	0	User Cyt4 EM Mean CV (%)	30	Subcutis regional blood flow scalar : Male	1	UGT2B11 UM Mean CV (%)	0	Lobe Distribution Percentage (%) Epithelial Lining Fluid Volume LT	8.33
	Abundance : Basolateral Efflux (Kidney) UT Freq	0	Absolute Abundance : UGT1A7	0	User Cyt4 PM Mean	0	Subcutis regional blood flow scalar CV (%) : Male	0	UGT2B11 IM Mean	0	Lobe Distribution Percentage (%) Epithelial Lining Fluid Volume LT	8.33
	Abundance : Basolateral Influx (Intestine) PT Freq	0	Turnover rate : UGT1A7 Mean	1e-06	User Cyt4 PM Mean CV (%)	0	Subcutis regional blood flow scalar : Female	1	UGT2B11 IM Mean CV (%)	0	Lobe Distribution Percentage (%) Ventillation Rate LA	25.9
	Abundance : Basolateral Influx (Intestine) IT Freq	0	Turnover rate : UGT1A7 CV (%)	30	User Cyt4 UM Mean	0	Subcutis regional blood flow scalar CV (%) : Female	0	UGT2B11 Absolute Abundance	0	Lobe Distribution Percentage (%) Ventillation Rate LA	12.4
	Abundance : Basolateral Influx (Intestine) UT Freq	0	Abundance : UGT1A8 EM Mean	1	User Cyt4 UM Mean CV (%)	0	Muscle regional blood flow scalar : Male	1	UGT2B15 EM Mean	1	Lobe Distribution Percentage (%) Ventillation Rate LA	14.8
	Abundance : Basolateral Efflux (Intestine) PT Freq	0	Abundance : UGT1A8 EM CV (%)	30	User Cyt4 IM Mean	0	Muscle regional blood flow scalar CV (%) : Male	0	UGT2B15 EM Mean CV (%)	60	Lobe Distribution Percentage (%) Ventillation Rate LA	32.1
	Abundance : Basolateral Efflux (Intestine) IT Freq	0	Abundance : UGT1A8 PM Mean	0	User Cyt4 IM Mean CV (%)	0	Muscle regional blood flow scalar : Female	1	UGT2B15 PM Mean	0.07	Lobe Distribution Percentage (%) Ventillation Rate LA	14.8
	Abundance : Basolateral Efflux (Intestine) UT Freq	0	Abundance : UGT1A8 PM CV (%)	0	CES1 EM Mean	1	Muscle regional blood flow scalar CV (%) : Female	0	UGT2B15 PM Mean CV (%)	60	Lobe Distribution Percentage (%) Ventillation Rate LA	100
			Abundance : UGT1A8 UM Mean	0	CES1 EM CV (%)	30			UGT2B15 UM Mean	0	Lobe Distribution Percentage (%) Ventillation Rate LA	100
			Abundance : UGT1A8 UM CV (%)	0	CES1 PM Mean	0.11	MPMLA - Forearm Inner (volar)		UGT2B15 UM Mean CV (%)	0	Lobe Distribution Percentage (%) Blood Flow Rate LA	2.5
			Abundance : UGT1A8 IM Mean	0	CES1 PM CV (%)	30	Skin surface pH : Male	4.9	UGT2B15 IM Mean	0.47	Lobe Distribution Percentage (%) Blood Flow Rate LA	11.8
			Abundance : UGT1A8 IM CV (%)	0	CES1 UM Mean	0	Skin surface pH CV (%) : Male	8.8	UGT2B15 IM Mean CV (%)	60	Lobe Distribution Percentage (%) Blood Flow Rate LA	8.6
			Absolute Abundance : UGT1A8	0	CES1 UM CV (%)	0	Skin surface pH : Female	4.93	UGT2B15 Absolute Abundance	0.1	Lobe Distribution Percentage (%) Blood Flow Rate LA	34.9
			Turnover rate : UGT1A8 Mean	1e-06	CES1 IM Mean	0	Skin surface pH CV (%) : Female	7.4	UGT2B17 EM Mean	1	Lobe Distribution Percentage (%) Blood Flow Rate LA	8.6
			Turnover rate : UGT1A8 CV (%)	30	CES1 IM CV (%)	0	Skin temperature (°C) : Male	32	UGT2B17 EM Mean CV (%)	60	Lobe Distribution Percentage (%) Blood Flow Rate LA	5
			Abundance : UGT1A9 EM Mean	1	CES2 EM Mean	1	Skin temperature CV (%) : Male	0	UGT2B17 PM Mean	0.08	Lobe Distribution Percentage (%) Blood Flow Rate LA	2.5
			Abundance : UGT1A9 EM CV (%)	30	CES2 EM CV (%)	30	Skin temperature (°C) : Female	32	UGT2B17 PM Mean CV (%)	60	Lobe Distribution Percentage (%) Alveoli Volume LA	26.3
			Abundance : UGT1A9 PM Mean	0.07	CES2 PM Mean	0	Skin temperature CV (%) : Female	0	UGT2B17 UM Mean	0	Lobe Distribution Percentage (%) Alveoli Volume LA	10.5
			Abundance : UGT1A9 PM CV (%)	30	CES2 PM CV (%)	0	Shape of corneocyte : Male	Cuboid (brick)	UGT2B17 UM Mean CV (%)	0	Lobe Distribution Percentage (%) Alveoli Volume LA	15.8
			Abundance : UGT1A9 UM Mean	0	CES2 UM Mean	0	Shape of corneocyte : Female	Cuboid (brick)	UGT2B17 IM Mean	0.16	Lobe Distribution Percentage (%) Alveoli Volume LA	26.3
			Abundance : UGT1A9 UM CV (%)	0	CES2 UM CV (%)	0	Number of SC layers : Male	22	UGT2B17 IM Mean CV (%)	60	Lobe Distribution Percentage (%) Alveoli Volume LA	21
			Abundance : UGT1A9 IM Mean	0.19	CES2 IM Mean	0	Number of SC layers CV (%) : Male	14	UGT2B17 Absolute Abundance	11	Lobe Distribution Percentage (%) Alveoli Volume LA	50
			Abundance : UGT1A9 IM CV (%)	30	CES2 IM CV (%)	0	Number of SC layers : Female	22	UGT2B28 EM Mean	1	Lobe Distribution Percentage (%) Alveoli Volume LA	50
			Absolute Abundance : UGT1A9	31	Use User ES Option	Yes	Number of SC layers CV (%) : Female	30.3	UGT2B28 EM Mean CV (%)	60	Lobe Distribution Percentage (%) Absorption Area LA	26.3
			Turnover rate : UGT1A9 Mean	1e-06	User ES EM Mean	1	Water density (gm/cm3) : Male	1	UGT2B28 PM Mean	0	Lobe Distribution Percentage (%) Absorption Area LA	10.5
			Turnover rate : UGT1A9 CV (%)	30	User ES EM CV (%)	30	Water density CV (%) : Male	0	UGT2B28 PM Mean CV (%)	0	Lobe Distribution Percentage (%) Absorption Area LA	15.8
			Abundance : UGT1A10 EM Mean	1	User ES PM Mean	0	Water density (gm/cm3) : Female	1	UGT2B28 UM Mean	0	Lobe Distribution Percentage (%) Absorption Area LA	26.3
			Abundance : UGT1A10 EM CV (%)	30	User ES PM CV (%)	0	Water density CV (%) : Female	0	UGT2B28 UM Mean CV (%)	0	Lobe Distribution Percentage (%) Absorption Area LA	21
			Abundance : UGT1A10 PM Mean	0	User ES UM Mean	0	SC lipids density (gm/cm3) : Male	0.9	UGT2B28 IM Mean	0	Lobe Distribution Percentage (%) Absorption Area LA	50
			Abundance : UGT1A10 PM CV (%)	0	User ES UM CV (%)	0	SC lipids density CV (%) : Male	0	UGT2B28 IM Mean CV (%)	0	Lobe Distribution Percentage (%) Absorption Area LA	50
			Abundance : UGT1A10 UM Mean	0	User ES IM Mean	0	SC lipids density (gm/cm3) : Female	0.9	UGT2B28 Absolute Abundance	0	Lobe Distribution Percentage (%) Pulmonary Capilliary Blood Volume LA	16.66
			Abundance : UGT1A10 UM CV (%)	0	User ES IM CV (%)	0	SC lipids density CV (%) : Female	0	Use User UGT Option	Yes	Lobe Distribution Percentage (%) Pulmonary Capilliary Blood Volume LA	16.67
			Abundance : UGT1A10 IM Mean	0	Cortex/Medulla Ratio	0.92	SC proteins density (gm/cm3) : Male	1.37	UGT User	1	Lobe Distribution Percentage (%) Pulmonary Capilliary Blood Volume LA	16.67
			Abundance : UGT1A10 IM CV (%)	0	Peritubular Capillary (% Kidney volume)	7	SC proteins density CV (%) : Male	0	User UGT1 EM Mean	1	Lobe Distribution Percentage (%) Pulmonary Capilliary Blood Volume LA	16.67
			Absolute Abundance : UGT1A10	0.02	Million Nephrons per Subject Baseline	0.22693	SC proteins density (gm/cm3) : Female	1.37	User UGT1 EM Mean CV (%)	60	Lobe Distribution Percentage (%) Pulmonary Capilliary Blood Volume LA	16.67
			Turnover rate : UGT1A10 Mean	1e-06	Kidney Weight Coefficient	0.003948	SC proteins density CV (%) : Female	0	User UGT1 PM Mean	0	Lobe Distribution Percentage (%) Pulmonary Capilliary Blood Volume LA	8.33
			Turnover rate : UGT1A10 CV (%)	30	Proximal Tubule Length (mm)	18	Intercellular lipid thickness of SC (µm) : Male	0.091	User UGT1 PM Mean CV (%)	0	Lobe Distribution Percentage (%) Pulmonary Capilliary Blood Volume LA	8.33
			Abundance : UGT2B4 EM Mean	1	Henle's Loop Length (mm)	7	Intercellular lipid thickness of SC CV (%) : Male	0	User UGT1 UM Mean	0	Lobe Distribution Percentage (%) Pulmonary Mass Volume LA	16.66
			Abundance : UGT2B4 EM CV (%)	28	Distal Tubule Length (mm)	5.5	Intercellular lipid thickness of SC (µm) : Female	0.091	User UGT1 UM Mean CV (%)	0	Lobe Distribution Percentage (%) Pulmonary Mass Volume LA	16.67
			Abundance : UGT2B4 PM Mean	0	Collecting Duct Length (mm)	22	Intercellular lipid thickness of SC CV (%) : Female	0	User UGT1 IM Mean	0	Lobe Distribution Percentage (%) Pulmonary Mass Volume LA	16.67
			Abundance : UGT2B4 PM CV (%)	0	Proximal Tubule Diameter (mm)	0.06	Tortuosity of lipid diffusion pathway of SC : Male	12.7	User UGT1 IM Mean CV (%)	0	Lobe Distribution Percentage (%) Pulmonary Mass Volume LA	16.67
			Abundance : UGT2B4 UM Mean	0	Henle's Loop Diameter (mm)	0.018	Tortuosity of lipid diffusion pathway of SC CV (%) : Male	18	User UGT1 Absolute Abundance	0	Lobe Distribution Percentage (%) Pulmonary Mass Volume LA	16.67
			Abundance : UGT2B4 UM CV (%)	0	Distal Tubule Diameter (mm)	0.05	Tortuosity of lipid diffusion pathway of SC : Female	12.7	Use User Cytosolic Enzyme Option	Yes	Lobe Distribution Percentage (%) Pulmonary Mass Volume LA	8.33
			Abundance : UGT2B4 IM Mean	0	Collecting Duct Diameter (mm)	0.2	Tortuosity of lipid diffusion pathway of SC CV (%) : Female	18	User Cyt	1	Lobe Distribution Percentage (%) Pulmonary Mass Volume LA	8.33
			Abundance : UGT2B4 IM CV (%)	0	Proximal Tubule pH	7.4	Hair follicle diameter (µm) : Male	77.7	User Cyt1 EM Mean	1	Lobe Distribution Percentage (%) Epithelial Lining Fluid Volume LA	16.66
			Absolute Abundance : UGT2B4	54	Henle's Loop pH	7.4	Hair follicle diameter CV (%) : Male	32	User Cyt1 EM Mean CV (%)	60	Lobe Distribution Percentage (%) Epithelial Lining Fluid Volume LA	16.67
			Turnover rate : UGT2B4 Mean	1e-06	Distal Tubule pH	7.4	Hair follicle diameter (µm) : Female	77.7	User Cyt1 PM Mean	0	Lobe Distribution Percentage (%) Epithelial Lining Fluid Volume LA	16.67
			Turnover rate : UGT2B4 CV (%)	30	Collecting Duct pH	7.4	Hair follicle diameter CV (%) : Female	32	User Cyt1 PM Mean CV (%)	0	Lobe Distribution Percentage (%) Epithelial Lining Fluid Volume LA	16.67
			Abundance : UGT2B7 EM Mean	1	GFR Male Input Type	Predicted	Hair follicle density (N/cm2) : Male	18	User Cyt1 UM Mean	0	Lobe Distribution Percentage (%) Epithelial Lining Fluid Volume LA	16.67
			Abundance : UGT2B7 EM CV (%)	30.4	Male - Proximal Tubule Urine Flow Rate - GFR (mL/min)	130	Hair follicle density CV (%) : Male	39	User Cyt1 UM Mean CV (%)	0	Lobe Distribution Percentage (%) Epithelial Lining Fluid Volume LA	8.33
			Abundance : UGT2B7 PM Mean	0	Male - Henle's Loop Urine Flow Rate (mL/min)	43	Hair follicle density (N/cm2) : Female	18	User Cyt1 IM Mean	0	Lobe Distribution Percentage (%) Epithelial Lining Fluid Volume LA	8.33
			Abundance : UGT2B7 PM CV (%)	0	Male - Distal Tubule Urine Flow Rate (mL/min)	24	Hair follicle density CV (%) : Female	39	User Cyt1 IM Mean CV (%)	0	Lobe Distribution Percentage (%) Ventillation Rate UA	25.9
			Abundance : UGT2B7 UM Mean	0	Male - Collecting Duct Urine Flow Rate (mL/min)	11	Hair shaft diameter (µm) : Male	18	Use User Cytosolic Enzyme Option	Yes	Lobe Distribution Percentage (%) Ventillation Rate UA	12.4
			Abundance : UGT2B7 UM CV (%)	0	Male - Urine Flow Rate into Bladder (mL/min)	1	Hair shaft diameter CV (%) : Male	34	User Cyt	2	Lobe Distribution Percentage (%) Ventillation Rate UA	14.8
			Abundance : UGT2B7 IM Mean	0	GFR Female Input Type	Predicted	Hair shaft diameter (µm) : Female	18	User Cyt2 EM Mean	1	Lobe Distribution Percentage (%) Ventillation Rate UA	32.1
			Abundance : UGT2B7 IM CV (%)	0	Female - Proximal Tubule Urine Flow Rate - GFR (mL/min)	120	Hair shaft diameter CV (%) : Female	34	User Cyt2 EM Mean CV (%)	60	Lobe Distribution Percentage (%) Ventillation Rate UA	14.8
			Absolute Abundance : UGT2B7	71	Female - Henle's Loop Urine Flow Rate (mL/min)	47	Sebum viscosity (centipose) : Male	40	User Cyt2 PM Mean	0	Lobe Distribution Percentage (%) Ventillation Rate UA	100
			Turnover rate : UGT2B7 Mean	1e-06	Female - Distal Tubule Urine Flow Rate (mL/min)	26	Sebum viscosity CV (%) : Male	0	User Cyt2 PM Mean CV (%)	0	Lobe Distribution Percentage (%) Ventillation Rate UA	100
			Turnover rate : UGT2B7 CV (%)	30	Female - Collecting Duct Urine Flow Rate (mL/min)	12	Sebum viscosity (centipose) : Female	40	User Cyt2 UM Mean	0	Lobe Distribution Percentage (%) Blood Flow Rate UA	2.5
			Abundance : UGT2B10 EM Mean	1	Female - Urine Flow Rate into Bladder (mL/min)	1	Sebum viscosity CV (%) : Female	0	User Cyt2 UM Mean CV (%)	0	Lobe Distribution Percentage (%) Blood Flow Rate UA	11.8
			Abundance : UGT2B10 EM CV (%)	30	Bypass 1 before Glomerulus (%)	10	Corneocyte pH [top] : Male	6.8	User Cyt2 IM Mean	0	Lobe Distribution Percentage (%) Blood Flow Rate UA	8.6
			Abundance : UGT2B10 PM Mean	0	Bypass 1 before Glomerulus CV (%)	30	Corneocyte pH [top] CV (%) : Male	0	User Cyt2 IM Mean CV (%)	0	Lobe Distribution Percentage (%) Blood Flow Rate UA	34.9
			Abundance : UGT2B10 PM CV (%)	0	Bypass 2 to Henle's Loop & Medu-CD (%)	20	Corneocyte pH [top] : Female	6.8	Use User Cytosolic Enzyme Option	Yes	Lobe Distribution Percentage (%) Blood Flow Rate UA	8.6
			Abundance : UGT2B10 UM Mean	0	Bypass 2 to Henle's Loop & Medu-CD CV (%)	30	Corneocyte pH [top] CV (%) : Female	0	User Cyt	3	Lobe Distribution Percentage (%) Blood Flow Rate UA	5
			Abundance : UGT2B10 UM CV (%)	0	PT-S1 ABCB1 (MDR1/P-gp) / 106 PTC (Relative Values)	1	Corneocyte thickness [top] (µm) : Male	0.59	User Cyt3 EM Mean	1	Lobe Distribution Percentage (%) Blood Flow Rate UA	2.5
			Abundance : UGT2B10 IM Mean	0	PT-S1 ABCC4 (MRP4) / 106 PTC (Relative Values)	1	Corneocyte thickness [top] CV (%) : Male	22	User Cyt3 EM Mean CV (%)	60	Lobe Distribution Percentage (%) Alveoli Volume UA	26.3
			Abundance : UGT2B10 IM CV (%)	0	PT-S1 SLC22A2 (OCT2) / 106 PTC (Relative Values)	1	Corneocyte thickness [top] (µm) : Female	0.59	User Cyt3 PM Mean	0	Lobe Distribution Percentage (%) Alveoli Volume UA	10.5
			Absolute Abundance : UGT2B10	6.5	PT-S1 SLC22A6 (OAT1) / 106 PTC (Relative Values)	1	Corneocyte thickness [top] CV (%) : Female	22	User Cyt3 PM Mean CV (%)	0	Lobe Distribution Percentage (%) Alveoli Volume UA	15.8
			Turnover rate : UGT2B10 Mean	1e-06	PT-S1 SLC22A8 (OAT3) / 106 PTC (Relative Values)	1	Corneocyte width [top] (µm) : Male	29.6	User Cyt3 UM Mean	0	Lobe Distribution Percentage (%) Alveoli Volume UA	26.3
			Turnover rate : UGT2B10 CV (%)	30	PT-S1 SLC47As (MATEs) / 106 PTC (Relative Values)	1	Corneocyte width [top] CV (%) : Male	5.9	User Cyt3 UM Mean CV (%)	0	Lobe Distribution Percentage (%) Alveoli Volume UA	21
			Abundance : UGT2B11 EM Mean	1	PT-S1 Apical Influx (Kidney) / 106 PTC (Relative Values)	1	Corneocyte width [top] (µm) : Female	29.6	User Cyt3 IM Mean	0	Lobe Distribution Percentage (%) Alveoli Volume UA	50
			Abundance : UGT2B11 EM CV (%)	30	PT-S1 Basolateral Efflux (Kidney) / 106 PTC (Relative Values)	1	Corneocyte width [top] CV (%) : Female	5.9	User Cyt3 IM Mean CV (%)	0	Lobe Distribution Percentage (%) Alveoli Volume UA	50
			Abundance : UGT2B11 PM Mean	0	PT-S2 ABCB1 (MDR1/P-gp) / 106 PTC (Relative Values)	1	Corneocyte length [top] (µm) : Male	36.4	Use User Cytosolic Enzyme Option	Yes	Lobe Distribution Percentage (%) Absorption Area UA	26.3
			Abundance : UGT2B11 PM CV (%)	0	PT-S2 ABCC4 (MRP4) / 106 PTC (Relative Values)	1	Corneocyte length [top] CV (%) : Male	5.7	User Cyt	4	Lobe Distribution Percentage (%) Absorption Area UA	10.5
			Abundance : UGT2B11 UM Mean	0	PT-S2 SLC22A2 (OCT2) / 106 PTC (Relative Values)	1	Corneocyte length [top] (µm) : Female	36.4	User Cyt4 EM Mean	1	Lobe Distribution Percentage (%) Absorption Area UA	15.8
			Abundance : UGT2B11 UM CV (%)	0	PT-S2 SLC22A6 (OAT1) / 106 PTC (Relative Values)	1	Corneocyte length [top] CV (%) : Female	5.7	User Cyt4 EM Mean CV (%)	60	Lobe Distribution Percentage (%) Absorption Area UA	26.3
			Abundance : UGT2B11 IM Mean	0	PT-S2 SLC22A8 (OAT3) / 106 PTC (Relative Values)	1	Hydration level (% water volume) [top] : Male	33.9	User Cyt4 PM Mean	0	Lobe Distribution Percentage (%) Absorption Area UA	21
			Abundance : UGT2B11 IM CV (%)	0	PT-S2 SLC47As (MATEs) / 106 PTC (Relative Values)	1	Hydration level (% water volume) [top] CV (%) : Male	9	User Cyt4 PM Mean CV (%)	0	Lobe Distribution Percentage (%) Absorption Area UA	50
			Absolute Abundance : UGT2B11	0	PT-S2 Apical Influx (Kidney) / 106 PTC (Relative Values)	1	Hydration level (% water volume) [top] : Female	33.9	User Cyt4 UM Mean	0	Lobe Distribution Percentage (%) Absorption Area UA	50
			Turnover rate : UGT2B11 Mean	1e-06	PT-S2 Basolateral Efflux (Kidney) / 106 PTC (Relative Values)	1	Hydration level (% water volume) [top] CV (%) : Female	9	User Cyt4 UM Mean CV (%)	0	Lobe Distribution Percentage (%) Pulmonary Capilliary Blood Volume UA	16.66
			Turnover rate : UGT2B11 CV (%)	30	PT-S3 ABCB1 (MDR1/P-gp) / 106 PTC (Relative Values)	1	SC lipid viscosity [top] (centipose) : Male	75	User Cyt4 IM Mean	0	Lobe Distribution Percentage (%) Pulmonary Capilliary Blood Volume UA	16.67
			Abundance : UGT2B15 EM Mean	1	PT-S3 ABCC4 (MRP4) / 106 PTC (Relative Values)	1	SC lipid viscosity [top] CV (%) : Male	0	User Cyt4 IM Mean CV (%)	0	Lobe Distribution Percentage (%) Pulmonary Capilliary Blood Volume UA	16.67
			Abundance : UGT2B15 EM CV (%)	34	PT-S3 SLC22A2 (OCT2) / 106 PTC (Relative Values)	1	SC lipid viscosity [top] (centipose) : Female	75	CES1 EM Mean	1	Lobe Distribution Percentage (%) Pulmonary Capilliary Blood Volume UA	16.67
			Abundance : UGT2B15 PM Mean	0.07	PT-S3 SLC22A6 (OAT1) / 106 PTC (Relative Values)	1	SC lipid viscosity [top] CV (%) : Female	0	CES1 EM CV (%)	30	Lobe Distribution Percentage (%) Pulmonary Capilliary Blood Volume UA	16.67
			Abundance : UGT2B15 PM CV (%)	33	PT-S3 SLC22A8 (OAT3) / 106 PTC (Relative Values)	1	Corneocyte pH [upper mid] : Male	6.8	CES1 PM Mean	0.11	Lobe Distribution Percentage (%) Pulmonary Capilliary Blood Volume UA	8.33
			Abundance : UGT2B15 UM Mean	0	PT-S3 SLC47As (MATEs) / 106 PTC (Relative Values)	1	Corneocyte pH [upper mid] CV (%) : Male	0	CES1 PM CV (%)	30	Lobe Distribution Percentage (%) Pulmonary Capilliary Blood Volume UA	8.33
			Abundance : UGT2B15 UM CV (%)	0	PT-S3 Apical Influx (Kidney) / 106 PTC (Relative Values)	1	Corneocyte pH [upper mid] : Female	6.8	CES1 UM Mean	0	Lobe Distribution Percentage (%) Pulmonary Mass Volume UA	16.66
			Abundance : UGT2B15 IM Mean	0.47	PT-S3 Basolateral Efflux (Kidney) / 106 PTC (Relative Values)	1	Corneocyte pH [upper mid] CV (%) : Female	0	CES1 UM CV (%)	0	Lobe Distribution Percentage (%) Pulmonary Mass Volume UA	16.67
			Abundance : UGT2B15 IM CV (%)	37	ABCB1 (P-gp/MDR1) ET Mean	1	Corneocyte thickness [upper mid] (µm) : Male	0.67	CES1 IM Mean	0	Lobe Distribution Percentage (%) Pulmonary Mass Volume UA	16.67
			Absolute Abundance : UGT2B15	39	ABCB1 (P-gp/MDR1) ET CV (%)	60	Corneocyte thickness [upper mid] CV (%) : Male	22	CES1 IM CV (%)	0	Lobe Distribution Percentage (%) Pulmonary Mass Volume UA	16.67
			Turnover rate : UGT2B15 Mean	1e-06	ABCB1 (P-gp/MDR1) PT Mean	0	Corneocyte thickness [upper mid] (µm) : Female	0.67	CES2 EM Mean	1	Lobe Distribution Percentage (%) Pulmonary Mass Volume UA	16.67
			Turnover rate : UGT2B15 CV (%)	30	ABCB1 (P-gp/MDR1) PT CV (%)	0	Corneocyte thickness [upper mid] CV (%) : Female	22	CES2 EM CV (%)	30	Lobe Distribution Percentage (%) Pulmonary Mass Volume UA	8.33
			Abundance : UGT2B17 EM Mean	1	ABCB1 (P-gp/MDR1) IT Mean	0	Corneocyte width [upper mid] (µm) : Male	29.6	CES2 PM Mean	0	Lobe Distribution Percentage (%) Pulmonary Mass Volume UA	8.33
			Abundance : UGT2B17 EM CV (%)	28	ABCB1 (P-gp/MDR1) IT CV (%)	0	Corneocyte width [upper mid] CV (%) : Male	5.9	CES2 PM CV (%)	0	Lobe Distribution Percentage (%) Epithelial Lining Fluid Volume UA	16.66
			Abundance : UGT2B17 PM Mean	0.08	ABCB1 (P-gp/MDR1) UT Mean	0	Corneocyte width [upper mid] (µm) : Female	29.6	CES2 UM Mean	0	Lobe Distribution Percentage (%) Epithelial Lining Fluid Volume UA	16.67
			Abundance : UGT2B17 PM CV (%)	40	ABCB1 (P-gp/MDR1) UT CV (%)	0	Corneocyte width [upper mid] CV (%) : Female	5.9	CES2 UM CV (%)	0	Lobe Distribution Percentage (%) Epithelial Lining Fluid Volume UA	16.67
			Abundance : UGT2B17 UM Mean	0	ABCC4 (MRP4) ET Mean	1	Corneocyte length [upper mid] (µm) : Male	36.4	CES2 IM Mean	0	Lobe Distribution Percentage (%) Epithelial Lining Fluid Volume UA	16.67
			Abundance : UGT2B17 UM CV (%)	0	ABCC4 (MRP4) ET CV (%)	60	Corneocyte length [upper mid] CV (%) : Male	5.7	CES2 IM CV (%)	0	Lobe Distribution Percentage (%) Epithelial Lining Fluid Volume UA	16.67
			Abundance : UGT2B17 IM Mean	0.16	ABCC4 (MRP4) PT Mean	0	Corneocyte length [upper mid] (µm) : Female	36.4	Use User ES Option	Yes	Lobe Distribution Percentage (%) Epithelial Lining Fluid Volume UA	8.33
			Abundance : UGT2B17 IM CV (%)	30	ABCC4 (MRP4) PT CV (%)	0	Corneocyte length [upper mid] CV (%) : Female	5.7	User ES EM Mean	1	Lobe Distribution Percentage (%) Epithelial Lining Fluid Volume UA	8.33
			Absolute Abundance : UGT2B17	5.9	ABCC4 (MRP4) IT Mean	0	Hydration level (% water volume) [upper mid] : Male	44.6987	User ES EM CV (%)	30	Use local pH by segment	No
			Turnover rate : UGT2B17 Mean	1e-06	ABCC4 (MRP4) IT CV (%)	0	Hydration level (% water volume) [upper mid] CV (%) : Male	6	User ES PM Mean	0	Basal Influx 1 (Lung) Mean	1
			Turnover rate : UGT2B17 CV (%)	30	ABCC4 (MRP4) UT Mean	0	Hydration level (% water volume) [upper mid] : Female	44.6987	User ES PM CV (%)	0	Basal Influx 1 (Lung) CV (%)	0
			Abundance : UGT2B28 EM Mean	1	ABCC4 (MRP4) UT CV (%)	0	Hydration level (% water volume) [upper mid] CV (%) : Female	6	User ES UM Mean	0	Basal Influx 2 (Lung) Mean	1
			Abundance : UGT2B28 EM CV (%)	30	SLC22A2 (OCT2) ET Mean	1	SC lipid viscosity [upper mid] (centipose) : Male	75	User ES UM CV (%)	0	Basal Influx 2 (Lung) CV (%)	0
			Abundance : UGT2B28 PM Mean	0	SLC22A2 (OCT2) ET CV (%)	60	SC lipid viscosity [upper mid] CV (%) : Male	0	User ES IM Mean	0	Basal Efflux 1 (Lung) Mean	1
			Abundance : UGT2B28 PM CV (%)	0	SLC22A2 (OCT2) PT Mean	0	SC lipid viscosity [upper mid] (centipose) : Female	75	User ES IM CV (%)	0	Basal Efflux 1 (Lung) CV (%)	0
			Abundance : UGT2B28 UM Mean	0	SLC22A2 (OCT2) PT CV (%)	0	SC lipid viscosity [upper mid] CV (%) : Female	0	Achlorhydric Coefficient	0	Basal Efflux 2 (Lung) Mean	1
			Abundance : UGT2B28 UM CV (%)	0	SLC22A2 (OCT2) IT Mean	0	Corneocyte pH [lower mid] : Male	6.8	Achlorhydric Age Power	0	Basal Efflux 2 (Lung) CV (%)	0
			Abundance : UGT2B28 IM Mean	0	SLC22A2 (OCT2) IT CV (%)	0	Corneocyte pH [lower mid] CV (%) : Male	0	Achlorhydric Maximum (%)	0	Apical Influx 1 (Lung) Mean	1
			Abundance : UGT2B28 IM CV (%)	0	SLC22A2 (OCT2) UT Mean	0	Corneocyte pH [lower mid] : Female	6.8	Stomach pH Fed	5	Apical Influx 1 (Lung) CV (%)	0
			Absolute Abundance : UGT2B28	0	SLC22A2 (OCT2) UT CV (%)	0	Corneocyte pH [lower mid] CV (%) : Female	0	Stomach CV pH Fed (%)	25	Apical Influx 2 (Lung) Mean	1
			Turnover rate : UGT2B28 Mean	1e-06	SLC22A6 (OAT1) ET Mean	1	Corneocyte thickness [lower mid] (µm) : Male	0.76	Age < 65 Tff (h)	1.8	Apical Influx 2 (Lung) CV (%)	0
			Turnover rate : UGT2B28 CV (%)	30	SLC22A6 (OAT1) ET CV (%)	60	Corneocyte thickness [lower mid] CV (%) : Male	22	Age < 65 Tff CV (%)	65	Apical Efflux 1 (Lung) Mean	1
			Use User UGT Option	Yes	SLC22A6 (OAT1) PT Mean	0	Corneocyte thickness [lower mid] (µm) : Female	0.76	Age ≥ 65 Tff (h)	3	Apical Efflux 1 (Lung) CV (%)	0
			UGT User	1	SLC22A6 (OAT1) PT CV (%)	0	Corneocyte thickness [lower mid] CV (%) : Female	22	Age ≥ 65 Tff CV (%)	80	Apical Efflux 2 (Lung) Mean	1
			Abundance : User UGT1 EM Mean	1	SLC22A6 (OAT1) IT Mean	0	Corneocyte width [lower mid] (µm) : Male	29.6	Stomach pH Fasted	1.5	Apical Efflux 2 (Lung) CV (%)	0
			Abundance : User UGT1 EM CV (%)	30	SLC22A6 (OAT1) IT CV (%)	0	Corneocyte width [lower mid] CV (%) : Male	5.9	Stomach CV pH Fasted (%)	38
			Abundance : User UGT1 PM Mean	0	SLC22A6 (OAT1) UT Mean	0	Corneocyte width [lower mid] (µm) : Female	29.6	Stomach pH Fed	5	Initial bacteria number	20
			Abundance : User UGT1 PM CV (%)	0	SLC22A6 (OAT1) UT CV (%)	0	Corneocyte width [lower mid] CV (%) : Female	5.9	Stomach CV pH Fed (%)	25
			Abundance : User UGT1 UM Mean	0	SLC22A8 (OAT3) ET Mean	1	Corneocyte length [lower mid] (µm) : Male	36.4	Stomach Bicarbonate Buffer Concentration Fasted (mM)	7.3	Granuloma growth period (days)	200
			Abundance : User UGT1 UM CV (%)	0	SLC22A8 (OAT3) ET CV (%)	60	Corneocyte length [lower mid] CV (%) : Male	5.7	Stomach Bicarbonate Buffer Concentration CV Fasted (%)	30
			Abundance : User UGT1 IM Mean	0	SLC22A8 (OAT3) PT Mean	0	Corneocyte length [lower mid] (µm) : Female	36.4	Stomach Bicarbonate Buffer Concentration Fed (mM)	42.46	Granuloma location Frequency: RLM	1
			Abundance : User UGT1 IM CV (%)	0	SLC22A8 (OAT3) PT CV (%)	0	Corneocyte length [lower mid] CV (%) : Female	5.7	Stomach Bicarbonate Buffer Concentration CV Fed (%)	30	Granuloma location Frequency: RMM	0
			Absolute Abundance : User UGT1	0	SLC22A8 (OAT3) IT Mean	0	Hydration level (% water volume) [lower mid] : Male	55.5388	Stomach Luminal Fluid Velocity Fasted (m/s)	0.032	Granuloma location Frequency: RMM	0
			Turnover rate : User UGT1 Mean	1e-06	SLC22A8 (OAT3) IT CV (%)	0	Hydration level (% water volume) [lower mid] CV (%) : Male	5	Stomach Luminal Fluid Velocity CV Fasted (%)	30	Granuloma location Frequency: LLM	0
			Turnover rate : User UGT1 CV (%)	30	SLC22A8 (OAT3) UT Mean	0	Hydration level (% water volume) [lower mid] : Female	55.5388	Stomach Luminal Fluid Velocity Fed (m/s)	0.032	Granuloma location Frequency: LTM	0
			Use User Cytosolic Enzyme Option	Yes	SLC22A8 (OAT3) UT CV (%)	0	Hydration level (% water volume) [lower mid] CV (%) : Female	5	Stomach Luminal Fluid Velocity CV Fed (%)	30
			User Cyt	1	SLC47As (MATEs) ET Mean	1	SC lipid viscosity [lower mid] (centipose) : Male	75	Stomach Fluid Viscosity Fasted (cP)	3	Macrophage diameter (μm): Mean	21.2
			Abundance : User Cyt1 EM Mean	1	SLC47As (MATEs) ET CV (%)	60	SC lipid viscosity [lower mid] CV (%) : Male	0	Stomach Fluid Viscosity CV Fasted (%)	71	Macrophage fraction (%): Mean	50
			Abundance : User Cyt1 EM CV (%)	30	SLC47As (MATEs) PT Mean	0	SC lipid viscosity [lower mid] (centipose) : Female	75	Stomach Fluid Viscosity Fed (cP)	232	ISF fraction (%): Mean	10
			Abundance : User Cyt1 PM Mean	0	SLC47As (MATEs) PT CV (%)	0	SC lipid viscosity [lower mid] CV (%) : Female	0	Stomach Fluid Viscosity CV Fed (%)	32	ISF fraction: CV (%)	30
			Abundance : User Cyt1 PM CV (%)	0	SLC47As (MATEs) IT Mean	0	Corneocyte pH [bottom] : Male	6.8	Stomach CMC fasted (mM)	1	Outer-caseum fraction (%): Mean	20
			Abundance : User Cyt1 UM Mean	0	SLC47As (MATEs) IT CV (%)	0	Corneocyte pH [bottom] CV (%) : Male	0	Stomach CMC fed (mM)	1	Outer-caseum fraction: CV (%)	30
			Abundance : User Cyt1 UM CV (%)	0	SLC47As (MATEs) UT Mean	0	Corneocyte pH [bottom] : Female	6.8	Stomach Bile fasted (mM)	0.29	Inner-caseum fraction (%): Mean	20
			Abundance : User Cyt1 IM Mean	0	SLC47As (MATEs) UT CV (%)	0	Corneocyte pH [bottom] CV (%) : Female	0	Stomach Bile fasted CV (%)	141	Inner-caseum fraction: CV (%)	30
			Abundance : User Cyt1 IM CV (%)	0	Apical Influx (Kidney) ET Mean	1	Corneocyte thickness [bottom] (µm) : Male	0.86	Stomach Bile fed (mM)	0.29
			Use User Cytosolic Enzyme Option	Yes	Apical Influx (Kidney) ET CV (%)	60	Corneocyte thickness [bottom] CV (%) : Male	22	Stomach Bile fed CV (%)	100	Local pH: macrophage	5
			User Cyt	2	Apical Influx (Kidney) PT Mean	0	Corneocyte thickness [bottom] (µm) : Female	0.86	Duodenum Blood Flow (Qvilli %)	8.8	Local pH: ISF	6.7
			Abundance : User Cyt2 EM Mean	1	Apical Influx (Kidney) PT CV (%)	0	Corneocyte thickness [bottom] CV (%) : Female	22	Duodenum Transit Time (% Total)	4.6	Local pH: caseum	7.4
			Abundance : User Cyt2 EM CV (%)	30	Apical Influx (Kidney) IT Mean	0	Corneocyte width [bottom] (µm) : Male	29.6	Duodenum CYP3A (% Total)	13.76
			Abundance : User Cyt2 PM Mean	0	Apical Influx (Kidney) IT CV (%)	0	Corneocyte width [bottom] CV (%) : Male	5.9	Duodenum S9PPI (% Total)	14.88	Uptake (macrophage): Mean	1
			Abundance : User Cyt2 PM CV (%)	0	Apical Influx (Kidney) UT Mean	0	Corneocyte width [bottom] (µm) : Female	29.6	Duodenum MPPI/CYP (% Total)	13.76	Uptake (macrophage): CV (%)	1
			Abundance : User Cyt2 UM Mean	0	Apical Influx (Kidney) UT CV (%)	0	Corneocyte width [bottom] CV (%) : Female	5.9	Duodenum CPPI (% Total)	14.88	Efflux (macrophage): Mean	1
			Abundance : User Cyt2 UM CV (%)	0	Basolateral Efflux (Kidney) ET Mean	1	Corneocyte length [bottom] (µm) : Male	36.4	Duodenum pH Fasted	6.4	Efflux (macrophage): CV (%)	0
			Abundance : User Cyt2 IM Mean	0	Basolateral Efflux (Kidney) ET CV (%)	60	Corneocyte length [bottom] CV (%) : Male	5.7	Duodenum CV pH Fasted (%)	16	BN pre-treatment number: Mean	80
			Abundance : User Cyt2 IM CV (%)	0	Basolateral Efflux (Kidney) PT Mean	0	Corneocyte length [bottom] (µm) : Female	36.4	Duodenum pH Fed	5.4	BN pre-treatment number: CV (%)	30
			Use User Cytosolic Enzyme Option	Yes	Basolateral Efflux (Kidney) PT CV (%)	0	Corneocyte length [bottom] CV (%) : Female	5.7	Duodenum CV pH Fed (%)	11
			User Cyt	3	Basolateral Efflux (Kidney) IT Mean	0	Hydration level (% water volume) [bottom] : Male	66.4	Duodenum Bicarbonate Buffer Concentration Fasted (mM)	6.53
			Abundance : User Cyt3 EM Mean	1	Basolateral Efflux (Kidney) IT CV (%)	0	Hydration level (% water volume) [bottom] CV (%) : Male	4	Duodenum Bicarbonate Buffer Concentration CV Fasted (%)	30
			Abundance : User Cyt3 EM CV (%)	30	Basolateral Efflux (Kidney) UT Mean	0	Hydration level (% water volume) [bottom] : Female	66.4	Duodenum Bicarbonate Buffer Concentration Fed (mM)	34.19
			Abundance : User Cyt3 PM Mean	0	Basolateral Efflux (Kidney) UT CV (%)	0	Hydration level (% water volume) [bottom] CV (%) : Female	4	Duodenum Bicarbonate Buffer Concentration CV Fed (%)	30
			Abundance : User Cyt3 PM CV (%)	0			SC lipid viscosity [bottom] (centipose) : Male	75	Duodenum Luminal Fluid Velocity Fasted (m/s)	0.005
			Abundance : User Cyt3 UM Mean	0			SC lipid viscosity [bottom] CV (%) : Male	0	Duodenum Luminal Fluid Velocity CV Fasted (%)	30
			Abundance : User Cyt3 UM CV (%)	0			SC lipid viscosity [bottom] (centipose) : Female	75	Duodenum Luminal Fluid Velocity Fed (m/s)	0.005
			Abundance : User Cyt3 IM Mean	0			SC lipid viscosity [bottom] CV (%) : Female	0	Duodenum Luminal Fluid Velocity CV Fed (%)	30
			Abundance : User Cyt3 IM CV (%)	0			Viable Epidermis thickness (µm) : Male	41.9655	Duodenum Fluid Viscosity Fasted (cP)	3
			Use User Cytosolic Enzyme Option	Yes			Viable Epidermis thickness CV (%) : Male	19	Duodenum Fluid Viscosity CV Fasted (%)	71
			User Cyt	4			Viable Epidermis thickness (µm) : Female	41.9655	Duodenum Fluid Viscosity Fed (cP)	65
			Abundance : User Cyt4 EM Mean	1			Viable Epidermis thickness CV (%) : Female	19	Duodenum Fluid Viscosity CV Fed (%)	27
			Abundance : User Cyt4 EM CV (%)	30			Dermis thickness (µm) : Male	1240	Duodenum CMC fasted (mM)	1
			Abundance : User Cyt4 PM Mean	0			Dermis thickness CV (%) : Male	20	Duodenum CMC fed (mM)	1
			Abundance : User Cyt4 PM CV (%)	0			Dermis thickness (µm) : Female	1240	Duodenum Bile fasted (mM)	3.31
			Abundance : User Cyt4 UM Mean	0			Dermis thickness CV (%) : Female	20	Duodenum Bile fasted CV (%)	97
			Abundance : User Cyt4 UM CV (%)	0			Subcutis thickness (mm) : Male	1.91	Duodenum Bile fed (mM)	8.74
			Abundance : User Cyt4 IM Mean	0			Subcutis thickness CV (%) : Male	55.72	Duodenum Bile fed CV (%)	79
			Abundance : User Cyt4 IM CV (%)	0			Subcutis thickness (mm) : Female	1.91	Duodenum Channel Depth Mean (µm)	522.78
			Abundance : CES1 EM Mean	1			Subcutis thickness CV (%) : Female	55.72	Duodenum Channel Depth CV (%)	32.72
			Abundance : CES1 EM CV (%)	46			Muscle thickness (mm) : Male	29.88	Duodenum Channel Width Mean (µm)	28.03
			Abundance : CES1 PM Mean	0.11			Muscle thickness CV (%) : Male	61.44	Duodenum Channel Width CV (%)	28.69
			Abundance : CES1 PM CV (%)	30			Muscle thickness (mm) : Female	23.81	Duodenum Mean Thickness Mean (µm)	128.35
			Abundance : CES1 UM Mean	0			Muscle thickness CV (%) : Female	14.85	Duodenum Mean Thickness CV (%)	8.1
			Abundance : CES1 UM CV (%)	0			Dermis regional blood flow scalar : Male	0.909226	Duodenum Fold Expansion Mean	1
			Abundance : CES1 IM Mean	0			Dermis regional blood flow scalar CV (%) : Male	0	Duodenum Fold Expansion CV (%)	0
			Abundance : CES1 IM CV (%)	0			Dermis regional blood flow scalar : Female	0.909226	Duodenum Pore Radius Mean	8.6
			Abundance : CES2 EM Mean	1			Dermis regional blood flow scalar CV (%) : Female	0	Duodenum Pore Radius CV (%)	0
			Abundance : CES2 EM CV (%)	35			Subcutis regional blood flow scalar : Male	1	Duodenum Unstirred Layer Thickness Mean (µm)	170
			Abundance : CES2 PM Mean	0			Subcutis regional blood flow scalar CV (%) : Male	0	Duodenum Unstirred Layer Thickness CV (%)	22.35
			Abundance : CES2 PM CV (%)	0			Subcutis regional blood flow scalar : Female	1	Duodenum Unstirred Layer pH	6.5
			Abundance : CES2 UM Mean	0			Subcutis regional blood flow scalar CV (%) : Female	0	Duodenum Unstirred Layer CV (%)	0.5
			Abundance : CES2 UM CV (%)	0			Muscle regional blood flow scalar : Male	1	Duodenum ABCB1 (P-gp/MDR1) (Relative values)	0.51
			Abundance : CES2 IM Mean	0			Muscle regional blood flow scalar CV (%) : Male	0	Duodenum ABCC1 (MRP1) (Relative values)	0.45
			Abundance : CES2 IM CV (%)	0			Muscle regional blood flow scalar : Female	1	Duodenum ABCC2 (MRP2) (Relative values)	1.41
			Use User ES Option	Yes			Muscle regional blood flow scalar CV (%) : Female	0	Duodenum ABCC3 (MRP3) (Relative values)	2.15
			Abundance : User ES EM Mean	1					Duodenum ABCC4 (MRP4) (Relative values)	1.02
			Abundance : User ES EM CV (%)	30			MPMLA - Forearm Outer (dorsal)		Duodenum ABCG2 (BCRP) (Relative values)	0.47
			Abundance : User ES PM Mean	0			Skin surface pH : Male	4.9	Duodenum SLC2A2 (GLUT2) (Relative values)	1
			Abundance : User ES PM CV (%)	0			Skin surface pH CV (%) : Male	8.8	Duodenum SLC10A2 (ASBT/IBAT) (Relative values)	16.49
			Abundance : User ES UM Mean	0			Skin surface pH : Female	4.9	Duodenum SLC15A1 (PEPT1) (Relative values)	0.94
			Abundance : User ES UM CV (%)	0			Skin surface pH CV (%) : Female	7.4	Duodenum SLC16A1 (MCT1) (Relative values)	1.25
			Abundance : User ES IM Mean	0			Skin temperature (°C) : Male	32	Duodenum SLCO2B1 (OATP2B1) (Relative values)	0.73
			Abundance : User ES IM CV (%)	0			Skin temperature CV (%) : Male	0	Duodenum SLCO4C1 (OATP4C1) (Relative values)	1
			CV for non P450 Clearance	30			Skin temperature (°C) : Female	32	Duodenum SLC22A1 (OCT1) (Relative values)	1.03
			Absolute Abundance : ABCB1 (P-gp/MDR1) (pmol/10^6 hepatocytes)	0.21			Skin temperature CV (%) : Female	0	Duodenum SLC22A3 (OCT3) (Relative values)	1.19
			Abundance : ABCB1 (P-gp/MDR1) ET Mean	1			Shape of corneocyte : Male	Cuboid (brick)	Duodenum SLC22A4 (OCTN1) (Relative values)	0.46
			Abundance : ABCB1 (P-gp/MDR1) ET CV (%)	61			Shape of corneocyte : Female	Cuboid (brick)	Duodenum SLC51A/B (OST-α/β) (Relative values)	0.56
			Abundance : ABCB1 (P-gp/MDR1) PT Mean	0			Number of SC layers : Male	22	Duodenum Apical Influx (Intestine) (Relative values)	1
			Abundance : ABCB1 (P-gp/MDR1) PT CV (%)	0			Number of SC layers CV (%) : Male	14	Duodenum Apical Efflux (Intestine) (Relative values)	1
			Abundance : ABCB1 (P-gp/MDR1) IT Mean	0			Number of SC layers : Female	22	Duodenum Basolateral Influx (Intestine) (Relative values)	1
			Abundance : ABCB1 (P-gp/MDR1) IT CV (%)	0			Number of SC layers CV (%) : Female	30.3	Duodenum Basolateral Efflux (Intestine) (Relative values)	1
			Abundance : ABCB1 (P-gp/MDR1) UT Mean	0			Water density (gm/cm3) : Male	1	Jejunum I Blood Flow (Qvilli %)	24.2
			Abundance : ABCB1 (P-gp/MDR1) UT CV (%)	0			Water density CV (%) : Male	0	Jejunum I Transit Time (% Total)	17.3
			Absolute Abundance : ABCB11 (BSEP) (pmol/10^6 hepatocytes)	0.89			Water density (gm/cm3) : Female	1	Jejunum I CYP3A (% Total)	27.24
			Abundance : ABCB11 (BSEP) ET Mean	1			Water density CV (%) : Female	0	Jejunum I S9PPI (% Total)	26.9
			Abundance : ABCB11 (BSEP) ET CV (%)	14			SC lipids density (gm/cm3) : Male	0.9	Jejunum I MPPI/CYP (% Total)	27.24
			Abundance : ABCB11 (BSEP) PT Mean	0			SC lipids density CV (%) : Male	0	Jejunum I CPPI (% Total)	26.9
			Abundance : ABCB11 (BSEP) PT CV (%)	0			SC lipids density (gm/cm3) : Female	0.9	Jejunum I pH Fasted	6.5
			Abundance : ABCB11 (BSEP) IT Mean	0			SC lipids density CV (%) : Female	0	Jejunum I CV pH Fasted (%)	13
			Abundance : ABCB11 (BSEP) IT CV (%)	0			SC proteins density (gm/cm3) : Male	1.37	Jejunum I pH Fed	6.5
			Abundance : ABCB11 (BSEP) UT Mean	0			SC proteins density CV (%) : Male	0	Jejunum I CV pH Fed (%)	13
			Abundance : ABCB11 (BSEP) UT CV (%)	0			SC proteins density (gm/cm3) : Female	1.37	Jejunum I Bicarbonate Buffer Concentration Fasted (mM)	9.94
			Absolute Abundance : ABCC2 (MRP2) (pmol/10^6 hepatocytes)	0.37			SC proteins density CV (%) : Female	0	Jejunum I Bicarbonate Buffer Concentration CV Fasted (%)	30
			Abundance : ABCC2 (MRP2) ET Mean	1			Intercellular lipid thickness of SC (µm) : Male	0.091	Jejunum I Bicarbonate Buffer Concentration Fed (mM)	17.34
			Abundance : ABCC2 (MRP2) ET CV (%)	60			Intercellular lipid thickness of SC CV (%) : Male	0	Jejunum I Bicarbonate Buffer Concentration CV Fed (%)	30
			Abundance : ABCC2 (MRP2) PT Mean	0			Intercellular lipid thickness of SC (µm) : Female	0.091	Jejunum I Luminal Fluid Velocity Fasted (m/s)	0.0013
			Abundance : ABCC2 (MRP2) PT CV (%)	0			Intercellular lipid thickness of SC CV (%) : Female	0	Jejunum I Luminal Fluid Velocity CV Fasted (%)	56
			Abundance : ABCC2 (MRP2) IT Mean	0			Tortuosity of lipid diffusion pathway of SC : Male	12.7	Jejunum I Luminal Fluid Velocity Fed (m/s)	0.0013
			Abundance : ABCC2 (MRP2) IT CV (%)	0			Tortuosity of lipid diffusion pathway of SC CV (%) : Male	18	Jejunum I Luminal Fluid Velocity CV Fed (%)	56
			Abundance : ABCC2 (MRP2) UT Mean	0			Tortuosity of lipid diffusion pathway of SC : Female	12.7	Jejunum I Fluid Viscosity Fasted (cP)	3
			Abundance : ABCC2 (MRP2) UT CV (%)	0			Tortuosity of lipid diffusion pathway of SC CV (%) : Female	18	Jejunum I Fluid Viscosity CV Fasted (%)	71
			Absolute Abundance : ABCC3 (MRP3) (pmol/10^6 hepatocytes)	0.19			Hair follicle diameter (µm) : Male	77.7	Jejunum I Fluid Viscosity Fed (cP)	33
			Abundance : ABCC3 (MRP3) ET Mean	1			Hair follicle diameter CV (%) : Male	32	Jejunum I Fluid Viscosity CV Fed (%)	36
			Abundance : ABCC3 (MRP3) ET CV (%)	104			Hair follicle diameter (µm) : Female	77.7	Jejunum I CMC fasted (mM)	1
			Abundance : ABCC3 (MRP3) PT Mean	0			Hair follicle diameter CV (%) : Female	32	Jejunum I CMC fed (mM)	1
			Abundance : ABCC3 (MRP3) PT CV (%)	0			Hair follicle density (N/cm2) : Male	18	Jejunum I Bile fasted (mM)	2.3
			Abundance : ABCC3 (MRP3) IT Mean	0			Hair follicle density CV (%) : Male	39	Jejunum I Bile fasted CV (%)	100
			Abundance : ABCC3 (MRP3) IT CV (%)	0			Hair follicle density (N/cm2) : Female	18	Jejunum I Bile fed (mM)	10.03
			Abundance : ABCC3 (MRP3) UT Mean	0			Hair follicle density CV (%) : Female	39	Jejunum I Bile fed CV (%)	73
			Abundance : ABCC3 (MRP3) UT CV (%)	0			Hair shaft diameter (µm) : Male	18	Jejunum I Channel Depth Mean (µm)	448.81
			Absolute Abundance : ABCC4 (MRP4) (pmol/10^6 hepatocytes)	0			Hair shaft diameter CV (%) : Male	34	Jejunum I Channel Depth CV (%)	21.82
			Abundance : ABCC4 (MRP4) ET Mean	1			Hair shaft diameter (µm) : Female	18	Jejunum I Channel Width Mean (µm)	22.44
			Abundance : ABCC4 (MRP4) ET CV (%)	60			Hair shaft diameter CV (%) : Female	34	Jejunum I Channel Width CV (%)	31.68
			Abundance : ABCC4 (MRP4) PT Mean	0			Sebum viscosity (centipose) : Male	40	Jejunum I Mean Thickness Mean (µm)	137.7
			Abundance : ABCC4 (MRP4) PT CV (%)	0			Sebum viscosity CV (%) : Male	0	Jejunum I Mean Thickness CV (%)	14.42
			Abundance : ABCC4 (MRP4) IT Mean	0			Sebum viscosity (centipose) : Female	40	Jejunum I Fold Expansion Mean	1.97
			Abundance : ABCC4 (MRP4) IT CV (%)	0			Sebum viscosity CV (%) : Female	0	Jejunum I Fold Expansion CV (%)	24.54
			Abundance : ABCC4 (MRP4) UT Mean	0			Corneocyte pH [top] : Male	6.8	Jejunum I Pore Radius Mean	8.6
			Abundance : ABCC4 (MRP4) UT CV (%)	0			Corneocyte pH [top] CV (%) : Male	0	Jejunum I Pore Radius CV (%)	0
			Absolute Abundance : ABCC6 (MRP6) (pmol/10^6 hepatocytes)	0			Corneocyte pH [top] : Female	6.8	Jejunum I Unstirred Layer Thickness Mean (µm)	123
			Abundance : ABCC6 (MRP6) ET Mean	1			Corneocyte pH [top] CV (%) : Female	0	Jejunum I Unstirred Layer Thickness CV (%)	3
			Abundance : ABCC6 (MRP6) ET CV (%)	60			Corneocyte thickness [top] (µm) : Male	0.69	Jejunum I Unstirred Layer pH	6.5
			Abundance : ABCC6 (MRP6) PT Mean	0			Corneocyte thickness [top] CV (%) : Male	22	Jejunum I Unstirred Layer CV (%)	0.5
			Abundance : ABCC6 (MRP6) PT CV (%)	0			Corneocyte thickness [top] (µm) : Female	0.69	Jejunum I ABCB1 (P-gp/MDR1) (pmol/mg total membrane protein)	0.4
			Abundance : ABCC6 (MRP6) IT Mean	0			Corneocyte thickness [top] CV (%) : Female	22	Jejunum I ABCC1 (MRP1) (pmol/mg total membrane protein)	0
			Abundance : ABCC6 (MRP6) IT CV (%)	0			Corneocyte width [top] (µm) : Male	29.6	Jejunum I ABCC2 (MRP2) (pmol/mg total membrane protein)	0.86
			Abundance : ABCC6 (MRP6) UT Mean	0			Corneocyte width [top] CV (%) : Male	5.9	Jejunum I ABCC3 (MRP3) (pmol/mg total membrane protein)	0.58
			Abundance : ABCC6 (MRP6) UT CV (%)	0			Corneocyte width [top] (µm) : Female	29.6	Jejunum I ABCC4 (MRP4) (pmol/mg total membrane protein)	0
			Absolute Abundance : ABCG2 (BCRP) (pmol/10^6 hepatocytes)	0.05			Corneocyte width [top] CV (%) : Female	5.9	Jejunum I ABCG2 (BCRP) (pmol/mg total membrane protein)	0.34
			Abundance : ABCG2 (BCRP) ET Mean	1			Corneocyte length [top] (µm) : Male	36.4	Jejunum I SLC2A2 (GLUT2) (pmol/mg total membrane protein)	0
			Abundance : ABCG2 (BCRP) ET CV (%)	42			Corneocyte length [top] CV (%) : Male	5.7	Jejunum I SLC10A2 (ASBT/IBAT) (pmol/mg total membrane protein)	0.01
			Abundance : ABCG2 (BCRP) PT Mean	0			Corneocyte length [top] (µm) : Female	36.4	Jejunum I SLC15A1 (PEPT1) (pmol/mg total membrane protein)	3.69
			Abundance : ABCG2 (BCRP) PT CV (%)	0			Corneocyte length [top] CV (%) : Female	5.7	Jejunum I SLC16A1 (MCT1) (pmol/mg total membrane protein)	0
			Abundance : ABCG2 (BCRP) IT Mean	0			Hydration level (% water volume) [top] : Male	33.9	Jejunum I SLCO2B1 (OATP2B1) (pmol/mg total membrane protein)	0.4
			Abundance : ABCG2 (BCRP) IT CV (%)	0			Hydration level (% water volume) [top] CV (%) : Male	9	Jejunum I SLCO4C1 (OATP4C1) (pmol/mg total membrane protein)	0
			Abundance : ABCG2 (BCRP) UT Mean	0			Hydration level (% water volume) [top] : Female	33.9	Jejunum I SLC22A1 (OCT1) (pmol/mg total membrane protein)	0.65
			Abundance : ABCG2 (BCRP) UT CV (%)	0			Hydration level (% water volume) [top] CV (%) : Female	9	Jejunum I SLC22A3 (OCT3) (pmol/mg total membrane protein)	0.06
			Absolute Abundance : SLC9A1 (ENT1) (pmol/10^6 hepatocytes)	0			SC lipid viscosity [top] (centipose) : Male	75	Jejunum I SLC22A4 (OCTN1) (pmol/mg total membrane protein)	0
			Abundance : SLC9A1 (ENT1) ET Mean	1			SC lipid viscosity [top] CV (%) : Male	0	Jejunum I SLC51A/B (OST-α/β) (pmol/mg total membrane protein)	0.47
			Abundance : SLC9A1 (ENT1) ET CV (%)	60			SC lipid viscosity [top] (centipose) : Female	75	Jejunum I Apical Influx (Intestine) (pmol/mg total membrane protein)	0
			Abundance : SLC9A1 (ENT1) PT Mean	0			SC lipid viscosity [top] CV (%) : Female	0	Jejunum I Apical Efflux (Intestine) (pmol/mg total membrane protein)	0
			Abundance : SLC9A1 (ENT1) PT CV (%)	0			Corneocyte pH [upper mid] : Male	6.8	Jejunum I Basolateral Influx (Intestine) (pmol/mg total membrane protein)	0
			Abundance : SLC9A1 (ENT1) IT Mean	0			Corneocyte pH [upper mid] CV (%) : Male	0	Jejunum I Basolateral Efflux (Intestine) (pmol/mg total membrane protein)	0
			Abundance : SLC9A1 (ENT1) IT CV (%)	0			Corneocyte pH [upper mid] : Female	6.8	Jejunum I ABCB1 (P-gp/MDR1) (Relative values)	1
			Abundance : SLC9A1 (ENT1) UT Mean	0			Corneocyte pH [upper mid] CV (%) : Female	0	Jejunum I ABCC1 (MRP1) (Relative values)	1
			Abundance : SLC9A1 (ENT1) UT CV (%)	0			Corneocyte thickness [upper mid] (µm) : Male	0.79	Jejunum I ABCC2 (MRP2) (Relative values)	1
			Absolute Abundance : SLC9A2 (ENT2) (pmol/10^6 hepatocytes)	0			Corneocyte thickness [upper mid] CV (%) : Male	22	Jejunum I ABCC3 (MRP3) (Relative values)	1
			Abundance : SLC9A2 (ENT2) ET Mean	1			Corneocyte thickness [upper mid] (µm) : Female	0.79	Jejunum I ABCC4 (MRP4) (Relative values)	1
			Abundance : SLC9A2 (ENT2) ET CV (%)	60			Corneocyte thickness [upper mid] CV (%) : Female	22	Jejunum I ABCG2 (BCRP) (Relative values)	1
			Abundance : SLC9A2 (ENT2) PT Mean	0			Corneocyte width [upper mid] (µm) : Male	29.6	Jejunum I SLC2A2 (GLUT2) (Relative values)	1
			Abundance : SLC9A2 (ENT2) PT CV (%)	0			Corneocyte width [upper mid] CV (%) : Male	5.9	Jejunum I SLC10A2 (ASBT/IBAT) (Relative values)	1
			Abundance : SLC9A2 (ENT2) IT Mean	0			Corneocyte width [upper mid] (µm) : Female	29.6	Jejunum I SLC15A1 (PEPT1) (Relative values)	1
			Abundance : SLC9A2 (ENT2) IT CV (%)	0			Corneocyte width [upper mid] CV (%) : Female	5.9	Jejunum I SLC16A1 (MCT1) (Relative values)	1
			Abundance : SLC9A2 (ENT2) UT Mean	0			Corneocyte length [upper mid] (µm) : Male	36.4	Jejunum I SLCO2B1 (OATP2B1) (Relative values)	1
			Abundance : SLC9A2 (ENT2) UT CV (%)	0			Corneocyte length [upper mid] CV (%) : Male	5.7	Jejunum I SLCO4C1 (OATP4C1) (Relative values)	1
			Absolute Abundance : SLC10A1 (NTCP) (pmol/10^6 hepatocytes)	0.81			Corneocyte length [upper mid] (µm) : Female	36.4	Jejunum I SLC22A1 (OCT1) (Relative values)	1
			Abundance : SLC10A1 (NTCP) ET Mean	1			Corneocyte length [upper mid] CV (%) : Female	5.7	Jejunum I SLC22A3 (OCT3) (Relative values)	1
			Abundance : SLC10A1 (NTCP) ET CV (%)	41			Hydration level (% water volume) [upper mid] : Male	44.6987	Jejunum I SLC22A4 (OCTN1) (Relative values)	1
			Abundance : SLC10A1 (NTCP) PT Mean	0			Hydration level (% water volume) [upper mid] CV (%) : Male	6	Jejunum I SLC51A/B (OST-α/β) (Relative values)	1
			Abundance : SLC10A1 (NTCP) PT CV (%)	0			Hydration level (% water volume) [upper mid] : Female	44.6987	Jejunum I Apical Influx (Intestine) (Relative values)	1
			Abundance : SLC10A1 (NTCP) IT Mean	0			Hydration level (% water volume) [upper mid] CV (%) : Female	6	Jejunum I Apical Efflux (Intestine) (Relative values)	1
			Abundance : SLC10A1 (NTCP) IT CV (%)	0			SC lipid viscosity [upper mid] (centipose) : Male	75	Jejunum I Basolateral Influx (Intestine) (Relative values)	1
			Abundance : SLC10A1 (NTCP) UT Mean	0			SC lipid viscosity [upper mid] CV (%) : Male	0	Jejunum I Basolateral Efflux (Intestine) (Relative values)	1
			Abundance : SLC10A1 (NTCP) UT CV (%)	0			SC lipid viscosity [upper mid] (centipose) : Female	75	Jejunum II Blood Flow (Qvilli %)	24.2
			Absolute Abundance : SLC16A1 (MCT1) (pmol/10^6 hepatocytes)	0			SC lipid viscosity [upper mid] CV (%) : Female	0	Jejunum II Transit Time (% Total)	17.3
			Abundance : SLC16A1 (MCT1) ET Mean	1			Corneocyte pH [lower mid] : Male	6.8	Jejunum II CYP3A (% Total)	27.24
			Abundance : SLC16A1 (MCT1) ET CV (%)	60			Corneocyte pH [lower mid] CV (%) : Male	0	Jejunum II S9PPI (% Total)	26.9
			Abundance : SLC16A1 (MCT1) PT Mean	0			Corneocyte pH [lower mid] : Female	6.8	Jejunum II MPPI/CYP (% Total)	27.24
			Abundance : SLC16A1 (MCT1) PT CV (%)	0			Corneocyte pH [lower mid] CV (%) : Female	0	Jejunum II CPPI (% Total)	26.9
			Abundance : SLC16A1 (MCT1) IT Mean	0			Corneocyte thickness [lower mid] (µm) : Male	0.89	Jejunum II pH Fasted	6.6
			Abundance : SLC16A1 (MCT1) IT CV (%)	0			Corneocyte thickness [lower mid] CV (%) : Male	22	Jejunum II CV pH Fasted (%)	11
			Abundance : SLC16A1 (MCT1) UT Mean	0			Corneocyte thickness [lower mid] (µm) : Female	0.89	Jejunum II pH Fed	6.6
			Abundance : SLC16A1 (MCT1) UT CV (%)	0			Corneocyte thickness [lower mid] CV (%) : Female	22	Jejunum II CV pH Fed (%)	11
			Absolute Abundance : SLCO1B1 (OATP1B1) (pmol/10^6 hepatocytes)	4.28			Corneocyte width [lower mid] (µm) : Male	29.6	Jejunum II Bicarbonate Buffer Concentration Fasted (mM)	9.94
			Abundance : SLCO1B1 (OATP1B1) ET Mean	1			Corneocyte width [lower mid] CV (%) : Male	5.9	Jejunum II Bicarbonate Buffer Concentration CV Fasted (%)	30
			Abundance : SLCO1B1 (OATP1B1) ET CV (%)	74			Corneocyte width [lower mid] (µm) : Female	29.6	Jejunum II Bicarbonate Buffer Concentration Fed (mM)	17.34
			Abundance : SLCO1B1 (OATP1B1) PT Mean	0.37			Corneocyte width [lower mid] CV (%) : Female	5.9	Jejunum II Bicarbonate Buffer Concentration CV Fed (%)	30
			Abundance : SLCO1B1 (OATP1B1) PT CV (%)	35			Corneocyte length [lower mid] (µm) : Male	36.4	Jejunum II Luminal Fluid Velocity Fasted (m/s)	0.0013
			Abundance : SLCO1B1 (OATP1B1) IT Mean	0.68			Corneocyte length [lower mid] CV (%) : Male	5.7	Jejunum II Luminal Fluid Velocity CV Fasted (%)	56
			Abundance : SLCO1B1 (OATP1B1) IT CV (%)	54			Corneocyte length [lower mid] (µm) : Female	36.4	Jejunum II Luminal Fluid Velocity Fed (m/s)	0.0013
			Abundance : SLCO1B1 (OATP1B1) UT Mean	1.47			Corneocyte length [lower mid] CV (%) : Female	5.7	Jejunum II Luminal Fluid Velocity CV Fed (%)	56
			Abundance : SLCO1B1 (OATP1B1) UT CV (%)	46			Hydration level (% water volume) [lower mid] : Male	55.5388	Jejunum II Fluid Viscosity Fasted (cP)	3
			Absolute Abundance : SLCO1B3 (OATP1B3) (pmol/10^6 hepatocytes)	4.3			Hydration level (% water volume) [lower mid] CV (%) : Male	5	Jejunum II Fluid Viscosity CV Fasted (%)	71
			Abundance : SLCO1B3 (OATP1B3) ET Mean	1			Hydration level (% water volume) [lower mid] : Female	55.5388	Jejunum II Fluid Viscosity Fed (cP)	12
			Abundance : SLCO1B3 (OATP1B3) ET CV (%)	49			Hydration level (% water volume) [lower mid] CV (%) : Female	5	Jejunum II Fluid Viscosity CV Fed (%)	14
			Abundance : SLCO1B3 (OATP1B3) PT Mean	0			SC lipid viscosity [lower mid] (centipose) : Male	75	Jejunum II CMC fasted (mM)	1
			Abundance : SLCO1B3 (OATP1B3) PT CV (%)	0			SC lipid viscosity [lower mid] CV (%) : Male	0	Jejunum II CMC fed (mM)	1
			Abundance : SLCO1B3 (OATP1B3) IT Mean	0			SC lipid viscosity [lower mid] (centipose) : Female	75	Jejunum II Bile fasted (mM)	3.55
			Abundance : SLCO1B3 (OATP1B3) IT CV (%)	0			SC lipid viscosity [lower mid] CV (%) : Female	0	Jejunum II Bile fasted CV (%)	42
			Abundance : SLCO1B3 (OATP1B3) UT Mean	0			Corneocyte pH [bottom] : Male	6.8	Jejunum II Bile fed (mM)	4.79
			Abundance : SLCO1B3 (OATP1B3) UT CV (%)	0			Corneocyte pH [bottom] CV (%) : Male	0	Jejunum II Bile fed CV (%)	66
			Absolute Abundance : SLCO2B1 (OATP2B1) (pmol/10^6 hepatocytes)	1.38			Corneocyte pH [bottom] : Female	6.8	Jejunum II Channel Depth Mean (µm)	448.81
			Abundance : SLCO2B1 (OATP2B1) ET Mean	1			Corneocyte pH [bottom] CV (%) : Female	0	Jejunum II Channel Depth CV (%)	21.82
			Abundance : SLCO2B1 (OATP2B1) ET CV (%)	41			Corneocyte thickness [bottom] (µm) : Male	1	Jejunum II Channel Width Mean (µm)	22.44
			Abundance : SLCO2B1 (OATP2B1) PT Mean	0			Corneocyte thickness [bottom] CV (%) : Male	22	Jejunum II Channel Width CV (%)	31.68
			Abundance : SLCO2B1 (OATP2B1) PT CV (%)	0			Corneocyte thickness [bottom] (µm) : Female	1	Jejunum II Mean Thickness Mean (µm)	137.7
			Abundance : SLCO2B1 (OATP2B1) IT Mean	0			Corneocyte thickness [bottom] CV (%) : Female	22	Jejunum II Mean Thickness CV (%)	14.42
			Abundance : SLCO2B1 (OATP2B1) IT CV (%)	0			Corneocyte width [bottom] (µm) : Male	29.6	Jejunum II Fold Expansion Mean	1.38
			Abundance : SLCO2B1 (OATP2B1) UT Mean	0			Corneocyte width [bottom] CV (%) : Male	5.9	Jejunum II Fold Expansion CV (%)	20.19
			Abundance : SLCO2B1 (OATP2B1) UT CV (%)	0			Corneocyte width [bottom] (µm) : Female	29.6	Jejunum II Pore Radius Mean	8.6
			Absolute Abundance : SLC22A1 (OCT1) (pmol/10^6 hepatocytes)	1.63			Corneocyte width [bottom] CV (%) : Female	5.9	Jejunum II Pore Radius CV (%)	0
			Abundance : SLC22A1 (OCT1) ET Mean	1			Corneocyte length [bottom] (µm) : Male	36.4	Jejunum II Unstirred Layer Thickness Mean (µm)	123
			Abundance : SLC22A1 (OCT1) ET CV (%)	90			Corneocyte length [bottom] CV (%) : Male	5.7	Jejunum II Unstirred Layer Thickness CV (%)	3
			Abundance : SLC22A1 (OCT1) PT Mean	0			Corneocyte length [bottom] (µm) : Female	36.4	Jejunum II Unstirred Layer pH	6.5
			Abundance : SLC22A1 (OCT1) PT CV (%)	0			Corneocyte length [bottom] CV (%) : Female	5.7	Jejunum II Unstirred Layer CV (%)	0.5
			Abundance : SLC22A1 (OCT1) IT Mean	0			Hydration level (% water volume) [bottom] : Male	66.4	Jejunum II ABCB1 (P-gp/MDR1) (Relative values)	1.46
			Abundance : SLC22A1 (OCT1) IT CV (%)	0			Hydration level (% water volume) [bottom] CV (%) : Male	4	Jejunum II ABCC1 (MRP1) (Relative values)	0.88
			Abundance : SLC22A1 (OCT1) UT Mean	0			Hydration level (% water volume) [bottom] : Female	66.4	Jejunum II ABCC2 (MRP2) (Relative values)	1
			Abundance : SLC22A1 (OCT1) UT CV (%)	0			Hydration level (% water volume) [bottom] CV (%) : Female	4	Jejunum II ABCC3 (MRP3) (Relative values)	0.89
			Absolute Abundance : SLC22A7 (OAT2) (pmol/10^6 hepatocytes)	0			SC lipid viscosity [bottom] (centipose) : Male	75	Jejunum II ABCC4 (MRP4) (Relative values)	1.22
			Abundance : SLC22A7 (OAT2) ET Mean	1			SC lipid viscosity [bottom] CV (%) : Male	0	Jejunum II ABCG2 (BCRP) (Relative values)	1
			Abundance : SLC22A7 (OAT2) ET CV (%)	60			SC lipid viscosity [bottom] (centipose) : Female	75	Jejunum II SLC2A2 (GLUT2) (Relative values)	1
			Abundance : SLC22A7 (OAT2) PT Mean	0			SC lipid viscosity [bottom] CV (%) : Female	0	Jejunum II SLC10A2 (ASBT/IBAT) (Relative values)	4
			Abundance : SLC22A7 (OAT2) PT CV (%)	0			Viable Epidermis thickness (µm) : Male	53.5684	Jejunum II SLC15A1 (PEPT1) (Relative values)	1.06
			Abundance : SLC22A7 (OAT2) IT Mean	0			Viable Epidermis thickness CV (%) : Male	21	Jejunum II SLC16A1 (MCT1) (Relative values)	1
			Abundance : SLC22A7 (OAT2) IT CV (%)	0			Viable Epidermis thickness (µm) : Female	53.5684	Jejunum II SLCO2B1 (OATP2B1) (Relative values)	0.94
			Abundance : SLC22A7 (OAT2) UT Mean	0			Viable Epidermis thickness CV (%) : Female	21	Jejunum II SLCO4C1 (OATP4C1) (Relative values)	1
			Abundance : SLC22A7 (OAT2) UT CV (%)	0			Dermis thickness (µm) : Male	1240	Jejunum II SLC22A1 (OCT1) (Relative values)	0.87
			Absolute Abundance : SLC22A9 (OAT7) (pmol/10^6 hepatocytes)	0			Dermis thickness CV (%) : Male	20	Jejunum II SLC22A3 (OCT3) (Relative values)	1.11
			Abundance : SLC22A9 (OAT7) ET Mean	1			Dermis thickness (µm) : Female	1240	Jejunum II SLC22A4 (OCTN1) (Relative values)	0.63
			Abundance : SLC22A9 (OAT7) ET CV (%)	60			Dermis thickness CV (%) : Female	20	Jejunum II SLC51A/B (OST-α/β) (Relative values)	1.89
			Abundance : SLC22A9 (OAT7) PT Mean	0			Subcutis thickness (mm) : Male	1.91	Jejunum II Apical Influx (Intestine) (Relative values)	1
			Abundance : SLC22A9 (OAT7) PT CV (%)	0			Subcutis thickness CV (%) : Male	55.72	Jejunum II Apical Efflux (Intestine) (Relative values)	1
			Abundance : SLC22A9 (OAT7) IT Mean	0			Subcutis thickness (mm) : Female	1.91	Jejunum II Basolateral Influx (Intestine) (Relative values)	1
			Abundance : SLC22A9 (OAT7) IT CV (%)	0			Subcutis thickness CV (%) : Female	55.72	Jejunum II Basolateral Efflux (Intestine) (Relative values)	1
			Abundance : SLC22A9 (OAT7) UT Mean	0			Muscle thickness (mm) : Male	29.88	Ileum I Blood Flow (Qvilli %)	10.7
			Abundance : SLC22A9 (OAT7) UT CV (%)	0			Muscle thickness CV (%) : Male	61.44	Ileum I Transit Time (% Total)	15.2
			Absolute Abundance : SLC47A1 (MATE1) (pmol/10^6 hepatocytes)	0.18			Muscle thickness (mm) : Female	23.81	Ileum I CYP3A (% Total)	7.94
			Abundance : SLC47A1 (MATE1) ET Mean	1			Muscle thickness CV (%) : Female	14.85	Ileum I S9PPI (% Total)	7.83
			Abundance : SLC47A1 (MATE1) ET CV (%)	31			Dermis regional blood flow scalar : Male	0.5875	Ileum I MPPI/CYP (% Total)	7.94
			Abundance : SLC47A1 (MATE1) PT Mean	0			Dermis regional blood flow scalar CV (%) : Male	0	Ileum I CPPI (% Total)	7.83
			Abundance : SLC47A1 (MATE1) PT CV (%)	0			Dermis regional blood flow scalar : Female	0.5875	Ileum I pH Fasted	6.8
			Abundance : SLC47A1 (MATE1) IT Mean	0			Dermis regional blood flow scalar CV (%) : Female	0	Ileum I CV pH Fasted (%)	10
			Abundance : SLC47A1 (MATE1) IT CV (%)	0			Subcutis regional blood flow scalar : Male	1	Ileum I pH Fed	6.8
			Abundance : SLC47A1 (MATE1) UT Mean	0			Subcutis regional blood flow scalar CV (%) : Male	0	Ileum I CV pH Fed (%)	10
			Abundance : SLC47A1 (MATE1) UT CV (%)	0			Subcutis regional blood flow scalar : Female	1	Ileum I Bicarbonate Buffer Concentration Fasted (mM)	30
			Absolute Abundance : SLC51A/B (OST-α/β) (pmol/10^6 hepatocytes)	0			Subcutis regional blood flow scalar CV (%) : Female	0	Ileum I Bicarbonate Buffer Concentration CV Fasted (%)	30
			Abundance : SLC51A/B (OST-α/β) ET Mean	1			Muscle regional blood flow scalar : Male	1	Ileum I Bicarbonate Buffer Concentration Fed (mM)	30
			Abundance : SLC51A/B (OST-α/β) ET CV (%)	60			Muscle regional blood flow scalar CV (%) : Male	0	Ileum I Bicarbonate Buffer Concentration CV Fed (%)	30
			Abundance : SLC51A/B (OST-α/β) PT Mean	0			Muscle regional blood flow scalar : Female	1	Ileum I Luminal Fluid Velocity Fasted (m/s)	0.0013
			Abundance : SLC51A/B (OST-α/β) PT CV (%)	0			Muscle regional blood flow scalar CV (%) : Female	0	Ileum I Luminal Fluid Velocity CV Fasted (%)	56
			Abundance : SLC51A/B (OST-α/β) IT Mean	0					Ileum I Luminal Fluid Velocity Fed (m/s)	0.0013
			Abundance : SLC51A/B (OST-α/β) IT CV (%)	0			MPMLA - Upper Arm		Ileum I Luminal Fluid Velocity CV Fed (%)	56
			Abundance : SLC51A/B (OST-α/β) UT Mean	0			Skin surface pH : Male	5.5	Ileum I Fluid Viscosity Fasted (cP)	3
			Abundance : SLC51A/B (OST-α/β) UT CV (%)	0			Skin surface pH CV (%) : Male	11.1	Ileum I Fluid Viscosity CV Fasted (%)	71
			Absolute Abundance : Sinusoidal Uptake (Liver) (pmol/10^6 hepatocytes)	0			Skin surface pH : Female	5.5	Ileum I Fluid Viscosity Fed (cP)	9
			Abundance : Sinusoidal Uptake (Liver) ET Mean	1			Skin surface pH CV (%) : Female	11.1	Ileum I Fluid Viscosity CV Fed (%)	2
			Abundance : Sinusoidal Uptake (Liver) ET CV (%)	0			Skin temperature (°C) : Male	32	Ileum I CMC fasted (mM)	1
			Abundance : Sinusoidal Uptake (Liver) PT Mean	0			Skin temperature CV (%) : Male	0	Ileum I CMC fed (mM)	1
			Abundance : Sinusoidal Uptake (Liver) PT CV (%)	0			Skin temperature (°C) : Female	32	Ileum I Bile fasted (mM)	1.25
			Abundance : Sinusoidal Uptake (Liver) IT Mean	0			Skin temperature CV (%) : Female	0	Ileum I Bile fasted CV (%)	30
			Abundance : Sinusoidal Uptake (Liver) IT CV (%)	0			Shape of corneocyte : Male	Cuboid (brick)	Ileum I Bile fed (mM)	5.86
			Abundance : Sinusoidal Uptake (Liver) UT Mean	0			Shape of corneocyte : Female	Cuboid (brick)	Ileum I Bile fed CV (%)	84
			Abundance : Sinusoidal Uptake (Liver) UT CV (%)	0			Number of SC layers : Male	18	Ileum I Channel Depth Mean (µm)	289.94
			Absolute Abundance : Sinusoidal Efflux (Liver) (pmol/10^6 hepatocytes)	0			Number of SC layers CV (%) : Male	21.6	Ileum I Channel Depth CV (%)	49.37
			Abundance : Sinusoidal Efflux (Liver) ET Mean	1			Number of SC layers : Female	18	Ileum I Channel Width Mean (µm)	56.19
			Abundance : Sinusoidal Efflux (Liver) ET CV (%)	0			Number of SC layers CV (%) : Female	21.6	Ileum I Channel Width CV (%)	30
			Abundance : Sinusoidal Efflux (Liver) PT Mean	0			Water density (gm/cm3) : Male	1	Ileum I Mean Thickness Mean (µm)	127
			Abundance : Sinusoidal Efflux (Liver) PT CV (%)	0			Water density CV (%) : Male	0	Ileum I Mean Thickness CV (%)	30
			Abundance : Sinusoidal Efflux (Liver) IT Mean	0			Water density (gm/cm3) : Female	1	Ileum I Fold Expansion Mean	1.1
			Abundance : Sinusoidal Efflux (Liver) IT CV (%)	0			Water density CV (%) : Female	0	Ileum I Fold Expansion CV (%)	9.15
			Abundance : Sinusoidal Efflux (Liver) UT Mean	0			SC lipids density (gm/cm3) : Male	0.9	Ileum I Pore Radius Mean	8.6
			Abundance : Sinusoidal Efflux (Liver) UT CV (%)	0			SC lipids density CV (%) : Male	0	Ileum I Pore Radius CV (%)	0
			Absolute Abundance : Canalicular Efflux (Liver) (pmol/10^6 hepatocytes)	0			SC lipids density (gm/cm3) : Female	0.9	Ileum I Unstirred Layer Thickness Mean (µm)	480
			Abundance : Canalicular Efflux (Liver) ET Mean	1			SC lipids density CV (%) : Female	0	Ileum I Unstirred Layer Thickness CV (%)	10
			Abundance : Canalicular Efflux (Liver) ET CV (%)	0			SC proteins density (gm/cm3) : Male	1.37	Ileum I Unstirred Layer pH	6.5
			Abundance : Canalicular Efflux (Liver) PT Mean	0			SC proteins density CV (%) : Male	0	Ileum I Unstirred Layer CV (%)	0.5
			Abundance : Canalicular Efflux (Liver) PT CV (%)	0			SC proteins density (gm/cm3) : Female	1.37	Ileum I ABCB1 (P-gp/MDR1) (Relative values)	1.5
			Abundance : Canalicular Efflux (Liver) IT Mean	0			SC proteins density CV (%) : Female	0	Ileum I ABCC1 (MRP1) (Relative values)	0.86
			Abundance : Canalicular Efflux (Liver) IT CV (%)	0			Intercellular lipid thickness of SC (µm) : Male	0.091	Ileum I ABCC2 (MRP2) (Relative values)	0.6
			Abundance : Canalicular Efflux (Liver) UT Mean	0			Intercellular lipid thickness of SC CV (%) : Male	0	Ileum I ABCC3 (MRP3) (Relative values)	1.54
			Abundance : Canalicular Efflux (Liver) UT CV (%)	0			Intercellular lipid thickness of SC (µm) : Female	0.091	Ileum I ABCC4 (MRP4) (Relative values)	1.71
							Intercellular lipid thickness of SC CV (%) : Female	0	Ileum I ABCG2 (BCRP) (Relative values)	0.59
							Tortuosity of lipid diffusion pathway of SC : Male	12.7	Ileum I SLC2A2 (GLUT2) (Relative values)	1
							Tortuosity of lipid diffusion pathway of SC CV (%) : Male	18	Ileum I SLC10A2 (ASBT/IBAT) (Relative values)	98.44
							Tortuosity of lipid diffusion pathway of SC : Female	12.7	Ileum I SLC15A1 (PEPT1) (Relative values)	1.23
							Tortuosity of lipid diffusion pathway of SC CV (%) : Female	18	Ileum I SLC16A1 (MCT1) (Relative values)	1.29
							Hair follicle diameter (µm) : Male	88.8	Ileum I SLCO2B1 (OATP2B1) (Relative values)	1.28
							Hair follicle diameter CV (%) : Male	33	Ileum I SLCO4C1 (OATP4C1) (Relative values)	1
							Hair follicle diameter (µm) : Female	88.8	Ileum I SLC22A1 (OCT1) (Relative values)	1.29
							Hair follicle diameter CV (%) : Female	33	Ileum I SLC22A3 (OCT3) (Relative values)	1.08
							Hair follicle density (N/cm2) : Male	32	Ileum I SLC22A4 (OCTN1) (Relative values)	0.78
							Hair follicle density CV (%) : Male	28	Ileum I SLC51A/B (OST-α/β) (Relative values)	1.08
							Hair follicle density (N/cm2) : Female	32	Ileum I Apical Influx (Intestine) (Relative values)	1
							Hair follicle density CV (%) : Female	28	Ileum I Apical Efflux (Intestine) (Relative values)	1
							Hair shaft diameter (µm) : Male	16.8	Ileum I Basolateral Influx (Intestine) (Relative values)	1
							Hair shaft diameter CV (%) : Male	37	Ileum I Basolateral Efflux (Intestine) (Relative values)	1
							Hair shaft diameter (µm) : Female	16.8	Ileum II Blood Flow (Qvilli %)	10.7
							Hair shaft diameter CV (%) : Female	37	Ileum II Transit Time (% Total)	15.2
							Sebum viscosity (centipose) : Male	40	Ileum II CYP3A (% Total)	7.94
							Sebum viscosity CV (%) : Male	0	Ileum II S9PPI (% Total)	7.83
							Sebum viscosity (centipose) : Female	40	Ileum II MPPI/CYP (% Total)	7.94
							Sebum viscosity CV (%) : Female	0	Ileum II CPPI (% Total)	7.83
							Corneocyte pH [top] : Male	6.8	Ileum II pH Fasted	7
							Corneocyte pH [top] CV (%) : Male	0	Ileum II CV pH Fasted (%)	10
							Corneocyte pH [top] : Female	6.8	Ileum II pH Fed	7
							Corneocyte pH [top] CV (%) : Female	0	Ileum II CV pH Fed (%)	10
							Corneocyte thickness [top] (µm) : Male	0.71	Ileum II Bicarbonate Buffer Concentration Fasted (mM)	30
							Corneocyte thickness [top] CV (%) : Male	11	Ileum II Bicarbonate Buffer Concentration CV Fasted (%)	30
							Corneocyte thickness [top] (µm) : Female	0.71	Ileum II Bicarbonate Buffer Concentration Fed (mM)	30
							Corneocyte thickness [top] CV (%) : Female	11	Ileum II Bicarbonate Buffer Concentration CV Fed (%)	30
							Corneocyte width [top] (µm) : Male	33.2	Ileum II Luminal Fluid Velocity Fasted (m/s)	0.0013
							Corneocyte width [top] CV (%) : Male	10.4	Ileum II Luminal Fluid Velocity CV Fasted (%)	56
							Corneocyte width [top] (µm) : Female	33.2	Ileum II Luminal Fluid Velocity Fed (m/s)	0.0013
							Corneocyte width [top] CV (%) : Female	10.4	Ileum II Luminal Fluid Velocity CV Fed (%)	56
							Corneocyte length [top] (µm) : Male	40.4	Ileum II Fluid Viscosity Fasted (cP)	3
							Corneocyte length [top] CV (%) : Male	6.8	Ileum II Fluid Viscosity CV Fasted (%)	71
							Corneocyte length [top] (µm) : Female	40.4	Ileum II Fluid Viscosity Fed (cP)	3
							Corneocyte length [top] CV (%) : Female	6.8	Ileum II Fluid Viscosity CV Fed (%)	71
							Hydration level (% water volume) [top] : Male	33.6	Ileum II CMC fasted (mM)	1
							Hydration level (% water volume) [top] CV (%) : Male	11	Ileum II CMC fed (mM)	1
							Hydration level (% water volume) [top] : Female	33.6	Ileum II Bile fasted (mM)	1.25
							Hydration level (% water volume) [top] CV (%) : Female	11	Ileum II Bile fasted CV (%)	30
							SC lipid viscosity [top] (centipose) : Male	75	Ileum II Bile fed (mM)	8.61
							SC lipid viscosity [top] CV (%) : Male	0	Ileum II Bile fed CV (%)	88
							SC lipid viscosity [top] (centipose) : Female	75	Ileum II Channel Depth Mean (µm)	289.94
							SC lipid viscosity [top] CV (%) : Female	0	Ileum II Channel Depth CV (%)	49.37
							Corneocyte pH [upper mid] : Male	6.8	Ileum II Channel Width Mean (µm)	56.19
							Corneocyte pH [upper mid] CV (%) : Male	0	Ileum II Channel Width CV (%)	30
							Corneocyte pH [upper mid] : Female	6.8	Ileum II Mean Thickness Mean (µm)	127
							Corneocyte pH [upper mid] CV (%) : Female	0	Ileum II Mean Thickness CV (%)	30
							Corneocyte thickness [upper mid] (µm) : Male	0.81	Ileum II Fold Expansion Mean	1.1
							Corneocyte thickness [upper mid] CV (%) : Male	11	Ileum II Fold Expansion CV (%)	9.15
							Corneocyte thickness [upper mid] (µm) : Female	0.81	Ileum II Pore Radius Mean	8.6
							Corneocyte thickness [upper mid] CV (%) : Female	11	Ileum II Pore Radius CV (%)	0
							Corneocyte width [upper mid] (µm) : Male	33.2	Ileum II Unstirred Layer Thickness Mean (µm)	480
							Corneocyte width [upper mid] CV (%) : Male	10.4	Ileum II Unstirred Layer Thickness CV (%)	10
							Corneocyte width [upper mid] (µm) : Female	33.2	Ileum II Unstirred Layer pH	6.5
							Corneocyte width [upper mid] CV (%) : Female	10.4	Ileum II Unstirred Layer CV (%)	0.5
							Corneocyte length [upper mid] (µm) : Male	40.4	Ileum II ABCB1 (P-gp/MDR1) (Relative values)	1.51
							Corneocyte length [upper mid] CV (%) : Male	6.8	Ileum II ABCC1 (MRP1) (Relative values)	0.86
							Corneocyte length [upper mid] (µm) : Female	40.4	Ileum II ABCC2 (MRP2) (Relative values)	0.6
							Corneocyte length [upper mid] CV (%) : Female	6.8	Ileum II ABCC3 (MRP3) (Relative values)	1.54
							Hydration level (% water volume) [upper mid] : Male	44.858	Ileum II ABCC4 (MRP4) (Relative values)	1.71
							Hydration level (% water volume) [upper mid] CV (%) : Male	7	Ileum II ABCG2 (BCRP) (Relative values)	0.59
							Hydration level (% water volume) [upper mid] : Female	44.858	Ileum II SLC2A2 (GLUT2) (Relative values)	1
							Hydration level (% water volume) [upper mid] CV (%) : Female	7	Ileum II SLC10A2 (ASBT/IBAT) (Relative values)	98.44
							SC lipid viscosity [upper mid] (centipose) : Male	75	Ileum II SLC15A1 (PEPT1) (Relative values)	1.23
							SC lipid viscosity [upper mid] CV (%) : Male	0	Ileum II SLC16A1 (MCT1) (Relative values)	1.29
							SC lipid viscosity [upper mid] (centipose) : Female	75	Ileum II SLCO2B1 (OATP2B1) (Relative values)	1.28
							SC lipid viscosity [upper mid] CV (%) : Female	0	Ileum II SLCO4C1 (OATP4C1) (Relative values)	1
							Corneocyte pH [lower mid] : Male	6.8	Ileum II SLC22A1 (OCT1) (Relative values)	1.29
							Corneocyte pH [lower mid] CV (%) : Male	0	Ileum II SLC22A3 (OCT3) (Relative values)	1.08
							Corneocyte pH [lower mid] : Female	6.8	Ileum II SLC22A4 (OCTN1) (Relative values)	0.78
							Corneocyte pH [lower mid] CV (%) : Female	0	Ileum II SLC51A/B (OST-α/β) (Relative values)	1.08
							Corneocyte thickness [lower mid] (µm) : Male	0.93	Ileum II Apical Influx (Intestine) (Relative values)	1
							Corneocyte thickness [lower mid] CV (%) : Male	11	Ileum II Apical Efflux (Intestine) (Relative values)	1
							Corneocyte thickness [lower mid] (µm) : Female	0.93	Ileum II Basolateral Influx (Intestine) (Relative values)	1
							Corneocyte thickness [lower mid] CV (%) : Female	11	Ileum II Basolateral Efflux (Intestine) (Relative values)	1
							Corneocyte width [lower mid] (µm) : Male	33.2	Ileum III Blood Flow (Qvilli %)	10.7
							Corneocyte width [lower mid] CV (%) : Male	10.4	Ileum III Transit Time (% Total)	15.2
							Corneocyte width [lower mid] (µm) : Female	33.2	Ileum III CYP3A (% Total)	7.94
							Corneocyte width [lower mid] CV (%) : Female	10.4	Ileum III S9PPI (% Total)	7.83
							Corneocyte length [lower mid] (µm) : Male	40.4	Ileum III MPPI/CYP (% Total)	7.94
							Corneocyte length [lower mid] CV (%) : Male	6.8	Ileum III CPPI (% Total)	7.83
							Corneocyte length [lower mid] (µm) : Female	40.4	Ileum III pH Fasted	7.1
							Corneocyte length [lower mid] CV (%) : Female	6.8	Ileum III CV pH Fasted (%)	7
							Hydration level (% water volume) [lower mid] : Male	56.0703	Ileum III pH Fed	7.1
							Hydration level (% water volume) [lower mid] CV (%) : Male	5	Ileum III CV pH Fed (%)	7
							Hydration level (% water volume) [lower mid] : Female	56.0703	Ileum III Bicarbonate Buffer Concentration Fasted (mM)	30
							Hydration level (% water volume) [lower mid] CV (%) : Female	5	Ileum III Bicarbonate Buffer Concentration CV Fasted (%)	30
							SC lipid viscosity [lower mid] (centipose) : Male	75	Ileum III Bicarbonate Buffer Concentration Fed (mM)	30
							SC lipid viscosity [lower mid] CV (%) : Male	0	Ileum III Bicarbonate Buffer Concentration CV Fed (%)	30
							SC lipid viscosity [lower mid] (centipose) : Female	75	Ileum III Luminal Fluid Velocity Fasted (m/s)	0.0013
							SC lipid viscosity [lower mid] CV (%) : Female	0	Ileum III Luminal Fluid Velocity CV Fasted (%)	56
							Corneocyte pH [bottom] : Male	6.8	Ileum III Luminal Fluid Velocity Fed (m/s)	0.0013
							Corneocyte pH [bottom] CV (%) : Male	0	Ileum III Luminal Fluid Velocity CV Fed (%)	56
							Corneocyte pH [bottom] : Female	6.8	Ileum III Fluid Viscosity Fasted (cP)	3
							Corneocyte pH [bottom] CV (%) : Female	0	Ileum III Fluid Viscosity CV Fasted (%)	71
							Corneocyte thickness [bottom] (µm) : Male	1.04	Ileum III Fluid Viscosity Fed (cP)	3
							Corneocyte thickness [bottom] CV (%) : Male	11	Ileum III Fluid Viscosity CV Fed (%)	71
							Corneocyte thickness [bottom] (µm) : Female	1.04	Ileum III CMC fasted (mM)	1
							Corneocyte thickness [bottom] CV (%) : Female	11	Ileum III CMC fed (mM)	1
							Corneocyte width [bottom] (µm) : Male	33.2	Ileum III Bile fasted (mM)	1.25
							Corneocyte width [bottom] CV (%) : Male	10.4	Ileum III Bile fasted CV (%)	30
							Corneocyte width [bottom] (µm) : Female	33.2	Ileum III Bile fed (mM)	8.06
							Corneocyte width [bottom] CV (%) : Female	10.4	Ileum III Bile fed CV (%)	65
							Corneocyte length [bottom] (µm) : Male	40.4	Ileum III Channel Depth Mean (µm)	289.94
							Corneocyte length [bottom] CV (%) : Male	6.8	Ileum III Channel Depth CV (%)	49.37
							Corneocyte length [bottom] (µm) : Female	40.4	Ileum III Channel Width Mean (µm)	56.19
							Corneocyte length [bottom] CV (%) : Female	6.8	Ileum III Channel Width CV (%)	30
							Hydration level (% water volume) [bottom] : Male	67.3	Ileum III Mean Thickness Mean (µm)	127
							Hydration level (% water volume) [bottom] CV (%) : Male	4	Ileum III Mean Thickness CV (%)	30
							Hydration level (% water volume) [bottom] : Female	67.3	Ileum III Fold Expansion Mean	1.08
							Hydration level (% water volume) [bottom] CV (%) : Female	4	Ileum III Fold Expansion CV (%)	16.07
							SC lipid viscosity [bottom] (centipose) : Male	75	Ileum III Pore Radius Mean	8.6
							SC lipid viscosity [bottom] CV (%) : Male	0	Ileum III Pore Radius CV (%)	0
							SC lipid viscosity [bottom] (centipose) : Female	75	Ileum III Unstirred Layer Thickness Mean (µm)	480
							SC lipid viscosity [bottom] CV (%) : Female	0	Ileum III Unstirred Layer Thickness CV (%)	10
							Viable Epidermis thickness (µm) : Male	51.8	Ileum III Unstirred Layer pH	6.5
							Viable Epidermis thickness CV (%) : Male	15	Ileum III Unstirred Layer CV (%)	0.5
							Viable Epidermis thickness (µm) : Female	51.8	Ileum III ABCB1 (P-gp/MDR1) (Relative values)	1.52
							Viable Epidermis thickness CV (%) : Female	15	Ileum III ABCC1 (MRP1) (Relative values)	0.89
							Dermis thickness (µm) : Male	1540	Ileum III ABCC2 (MRP2) (Relative values)	0.6
							Dermis thickness CV (%) : Male	29	Ileum III ABCC3 (MRP3) (Relative values)	1.6
							Dermis thickness (µm) : Female	1540	Ileum III ABCC4 (MRP4) (Relative values)	1.2
							Dermis thickness CV (%) : Female	29	Ileum III ABCG2 (BCRP) (Relative values)	0.59
							Subcutis thickness (mm) : Male	8.41	Ileum III SLC2A2 (GLUT2) (Relative values)	1
							Subcutis thickness CV (%) : Male	39.61	Ileum III SLC10A2 (ASBT/IBAT) (Relative values)	109.18
							Subcutis thickness (mm) : Female	9.64	Ileum III SLC15A1 (PEPT1) (Relative values)	1.24
							Subcutis thickness CV (%) : Female	56.2	Ileum III SLC16A1 (MCT1) (Relative values)	1.29
							Muscle thickness (mm) : Male	28.92	Ileum III SLCO2B1 (OATP2B1) (Relative values)	1.28
							Muscle thickness CV (%) : Male	15.09	Ileum III SLCO4C1 (OATP4C1) (Relative values)	1
							Muscle thickness (mm) : Female	22.79	Ileum III SLC22A1 (OCT1) (Relative values)	1.3
							Muscle thickness CV (%) : Female	28.92	Ileum III SLC22A3 (OCT3) (Relative values)	1.23
							Dermis regional blood flow scalar : Male	1.2869	Ileum III SLC22A4 (OCTN1) (Relative values)	0.8
							Dermis regional blood flow scalar CV (%) : Male	0	Ileum III SLC51A/B (OST-α/β) (Relative values)	0.93
							Dermis regional blood flow scalar : Female	1.2869	Ileum III Apical Influx (Intestine) (Relative values)	1
							Dermis regional blood flow scalar CV (%) : Female	0	Ileum III Apical Efflux (Intestine) (Relative values)	1
							Subcutis regional blood flow scalar : Male	1	Ileum III Basolateral Influx (Intestine) (Relative values)	1
							Subcutis regional blood flow scalar CV (%) : Male	0	Ileum III Basolateral Efflux (Intestine) (Relative values)	1
							Subcutis regional blood flow scalar : Female	1	Ileum IV Blood Flow (Qvilli %)	10.7
							Subcutis regional blood flow scalar CV (%) : Female	0	Ileum IV Transit Time (% Total)	15.2
							Muscle regional blood flow scalar : Male	1	Ileum IV CYP3A (% Total)	7.94
							Muscle regional blood flow scalar CV (%) : Male	0	Ileum IV S9PPI (% Total)	7.83
							Muscle regional blood flow scalar : Female	1	Ileum IV MPPI/CYP (% Total)	7.94
							Muscle regional blood flow scalar CV (%) : Female	0	Ileum IV CPPI (% Total)	7.83
									Ileum IV pH Fasted	7.3
							MPMLA - Face (cheek)		Ileum IV CV pH Fasted (%)	6
							Skin surface pH : Male	5	Ileum IV pH Fed	7.3
							Skin surface pH CV (%) : Male	5.2	Ileum IV CV pH Fed (%)	6
							Skin surface pH : Female	5	Ileum IV Bicarbonate Buffer Concentration Fasted (mM)	30
							Skin surface pH CV (%) : Female	6.1	Ileum IV Bicarbonate Buffer Concentration CV Fasted (%)	30
							Skin temperature (°C) : Male	32	Ileum IV Bicarbonate Buffer Concentration Fed (mM)	30
							Skin temperature CV (%) : Male	0	Ileum IV Bicarbonate Buffer Concentration CV Fed (%)	30
							Skin temperature (°C) : Female	32	Ileum IV Luminal Fluid Velocity Fasted (m/s)	0.0013
							Skin temperature CV (%) : Female	0	Ileum IV Luminal Fluid Velocity CV Fasted (%)	56
							Shape of corneocyte : Male	Cuboid (brick)	Ileum IV Luminal Fluid Velocity Fed (m/s)	0.0013
							Shape of corneocyte : Female	Cuboid (brick)	Ileum IV Luminal Fluid Velocity CV Fed (%)	56
							Number of SC layers : Male	13	Ileum IV Fluid Viscosity Fasted (cP)	3
							Number of SC layers CV (%) : Male	22.7	Ileum IV Fluid Viscosity CV Fasted (%)	71
							Number of SC layers : Female	13	Ileum IV Fluid Viscosity Fed (cP)	3
							Number of SC layers CV (%) : Female	22.7	Ileum IV Fluid Viscosity CV Fed (%)	71
							Water density (gm/cm3) : Male	1	Ileum IV CMC fasted (mM)	1
							Water density CV (%) : Male	0	Ileum IV CMC fed (mM)	1
							Water density (gm/cm3) : Female	1	Ileum IV Bile fasted (mM)	1.25
							Water density CV (%) : Female	0	Ileum IV Bile fasted CV (%)	30
							SC lipids density (gm/cm3) : Male	0.9	Ileum IV Bile fed (mM)	5.96
							SC lipids density CV (%) : Male	0	Ileum IV Bile fed CV (%)	65
							SC lipids density (gm/cm3) : Female	0.9	Ileum IV Channel Depth Mean (µm)	289.94
							SC lipids density CV (%) : Female	0	Ileum IV Channel Depth CV (%)	49.37
							SC proteins density (gm/cm3) : Male	1.37	Ileum IV Channel Width Mean (µm)	56.19
							SC proteins density CV (%) : Male	0	Ileum IV Channel Width CV (%)	30
							SC proteins density (gm/cm3) : Female	1.37	Ileum IV Mean Thickness Mean (µm)	127
							SC proteins density CV (%) : Female	0	Ileum IV Mean Thickness CV (%)	30
							Intercellular lipid thickness of SC (µm) : Male	0.091	Ileum IV Fold Expansion Mean	1.04
							Intercellular lipid thickness of SC CV (%) : Male	0	Ileum IV Fold Expansion CV (%)	12.4
							Intercellular lipid thickness of SC (µm) : Female	0.091	Ileum IV Pore Radius Mean	8.6
							Intercellular lipid thickness of SC CV (%) : Female	0	Ileum IV Pore Radius CV (%)	0
							Tortuosity of lipid diffusion pathway of SC : Male	12.7	Ileum IV Unstirred Layer Thickness Mean (µm)	480
							Tortuosity of lipid diffusion pathway of SC CV (%) : Male	18	Ileum IV Unstirred Layer Thickness CV (%)	10
							Tortuosity of lipid diffusion pathway of SC : Female	12.7	Ileum IV Unstirred Layer pH	6.5
							Tortuosity of lipid diffusion pathway of SC CV (%) : Female	18	Ileum IV Unstirred Layer CV (%)	0.5
							Hair follicle diameter (µm) : Male	65.4	Ileum IV ABCB1 (P-gp/MDR1) (Relative values)	1.51
							Hair follicle diameter CV (%) : Male	83	Ileum IV ABCC1 (MRP1) (Relative values)	0.89
							Hair follicle diameter (µm) : Female	65.4	Ileum IV ABCC2 (MRP2) (Relative values)	0.6
							Hair follicle diameter CV (%) : Female	83	Ileum IV ABCC3 (MRP3) (Relative values)	1.6
							Hair follicle density (N/cm2) : Male	292	Ileum IV ABCC4 (MRP4) (Relative values)	1.2
							Hair follicle density CV (%) : Male	16	Ileum IV ABCG2 (BCRP) (Relative values)	0.59
							Hair follicle density (N/cm2) : Female	292	Ileum IV SLC2A2 (GLUT2) (Relative values)	1
							Hair follicle density CV (%) : Female	16	Ileum IV SLC10A2 (ASBT/IBAT) (Relative values)	108
							Hair shaft diameter (µm) : Male	15.9	Ileum IV SLC15A1 (PEPT1) (Relative values)	1.24
							Hair shaft diameter CV (%) : Male	57	Ileum IV SLC16A1 (MCT1) (Relative values)	1.29
							Hair shaft diameter (µm) : Female	15.9	Ileum IV SLCO2B1 (OATP2B1) (Relative values)	1.28
							Hair shaft diameter CV (%) : Female	57	Ileum IV SLCO4C1 (OATP4C1) (Relative values)	1
							Sebum viscosity (centipose) : Male	40	Ileum IV SLC22A1 (OCT1) (Relative values)	1.3
							Sebum viscosity CV (%) : Male	0	Ileum IV SLC22A3 (OCT3) (Relative values)	1.23
							Sebum viscosity (centipose) : Female	40	Ileum IV SLC22A4 (OCTN1) (Relative values)	0.8
							Sebum viscosity CV (%) : Female	0	Ileum IV SLC51A/B (OST-α/β) (Relative values)	0.93
							Corneocyte pH [top] : Male	6.8	Ileum IV Apical Influx (Intestine) (Relative values)	1
							Corneocyte pH [top] CV (%) : Male	0	Ileum IV Apical Efflux (Intestine) (Relative values)	1
							Corneocyte pH [top] : Female	6.8	Ileum IV Basolateral Influx (Intestine) (Relative values)	1
							Corneocyte pH [top] CV (%) : Female	0	Ileum IV Basolateral Efflux (Intestine) (Relative values)	1
							Corneocyte thickness [top] (µm) : Male	0.47	Colon pH Fasted	6.5
							Corneocyte thickness [top] CV (%) : Male	4	Colon CV pH Fasted (%)	15
							Corneocyte thickness [top] (µm) : Female	0.47	Colon pH Fed	6.5
							Corneocyte thickness [top] CV (%) : Female	4	Colon CV pH Fed (%)	15
							Corneocyte width [top] (µm) : Male	27.7	Colon Bicarbonate Buffer Concentration Fasted (mM)	90.87
							Corneocyte width [top] CV (%) : Male	9.2	Colon Bicarbonate Buffer Concentration CV Fasted (%)	30
							Corneocyte width [top] (µm) : Female	27.7	Colon Bicarbonate Buffer Concentration Fed (mM)	44.43
							Corneocyte width [top] CV (%) : Female	9.2	Colon Bicarbonate Buffer Concentration CV Fed (%)	30
							Corneocyte length [top] (µm) : Male	34.2	Colon Luminal Fluid Velocity Fasted (m/s)	0.0013
							Corneocyte length [top] CV (%) : Male	4.1	Colon Luminal Fluid Velocity CV Fasted (%)	56
							Corneocyte length [top] (µm) : Female	34.2	Colon Luminal Fluid Velocity Fed (m/s)	0.0013
							Corneocyte length [top] CV (%) : Female	4.1	Colon Luminal Fluid Velocity CV Fed (%)	56
							Hydration level (% water volume) [top] : Male	35.5	Colon Fluid Viscosity Fasted (cP)	3
							Hydration level (% water volume) [top] CV (%) : Male	17	Colon Fluid Viscosity CV Fasted (%)	71
							Hydration level (% water volume) [top] : Female	35.5	Colon Fluid Viscosity Fed (cP)	3
							Hydration level (% water volume) [top] CV (%) : Female	17	Colon Fluid Viscosity CV Fed (%)	71
							SC lipid viscosity [top] (centipose) : Male	75	Colon CMC fasted (mM)	1
							SC lipid viscosity [top] CV (%) : Male	0	Colon CMC fed (mM)	1
							SC lipid viscosity [top] (centipose) : Female	75	Colon Bile fasted (mM)	0.6
							SC lipid viscosity [top] CV (%) : Female	0	Colon Bile fasted CV (%)	50
							Corneocyte pH [upper mid] : Male	6.8	Colon Bile fed (mM)	0.6
							Corneocyte pH [upper mid] CV (%) : Male	0	Colon Bile fed CV (%)	50
							Corneocyte pH [upper mid] : Female	6.8	Colon Fold Expansion Mean	1
							Corneocyte pH [upper mid] CV (%) : Female	0	Colon Fold Expansion CV (%)	0
							Corneocyte thickness [upper mid] (µm) : Male	0.53	Colon Pore Radius Mean	8.6
							Corneocyte thickness [upper mid] CV (%) : Male	4	Colon Pore Radius CV (%)	0
							Corneocyte thickness [upper mid] (µm) : Female	0.53	Colon Unstirred Layer Thickness Mean (µm)	830
							Corneocyte thickness [upper mid] CV (%) : Female	4	Colon Unstirred Layer Thickness CV (%)	13
							Corneocyte width [upper mid] (µm) : Male	27.7	Colon Unstirred Layer pH	6.5
							Corneocyte width [upper mid] CV (%) : Male	9.2	Colon Unstirred Layer CV (%)	0.5
							Corneocyte width [upper mid] (µm) : Female	27.7	Colon ABCB1 (P-gp/MDR1) (Relative values)	0.57
							Corneocyte width [upper mid] CV (%) : Female	9.2	Colon ABCC1 (MRP1) (Relative values)	0.93
							Corneocyte length [upper mid] (µm) : Male	34.2	Colon ABCC2 (MRP2) (Relative values)	0.02
							Corneocyte length [upper mid] CV (%) : Male	4.1	Colon ABCC3 (MRP3) (Relative values)	5.95
							Corneocyte length [upper mid] (µm) : Female	34.2	Colon ABCC4 (MRP4) (Relative values)	1.76
							Corneocyte length [upper mid] CV (%) : Female	4.1	Colon ABCG2 (BCRP) (Relative values)	0.13
							Hydration level (% water volume) [upper mid] : Male	46.1	Colon SLC2A2 (GLUT2) (Relative values)	1
							Hydration level (% water volume) [upper mid] CV (%) : Male	11	Colon SLC10A2 (ASBT/IBAT) (Relative values)	1.1
							Hydration level (% water volume) [upper mid] : Female	46.1	Colon SLC15A1 (PEPT1) (Relative values)	0.03
							Hydration level (% water volume) [upper mid] CV (%) : Female	11	Colon SLC16A1 (MCT1) (Relative values)	4.72
							SC lipid viscosity [upper mid] (centipose) : Male	75	Colon SLCO2B1 (OATP2B1) (Relative values)	1.06
							SC lipid viscosity [upper mid] CV (%) : Male	0	Colon SLCO4C1 (OATP4C1) (Relative values)	1
							SC lipid viscosity [upper mid] (centipose) : Female	75	Colon SLC22A1 (OCT1) (Relative values)	2.77
							SC lipid viscosity [upper mid] CV (%) : Female	0	Colon SLC22A3 (OCT3) (Relative values)	1.88
							Corneocyte pH [lower mid] : Male	6.8	Colon SLC22A4 (OCTN1) (Relative values)	0.24
							Corneocyte pH [lower mid] CV (%) : Male	0	Colon SLC51A/B (OST-α/β) (Relative values)	0.71
							Corneocyte pH [lower mid] : Female	6.8	Colon Apical Influx (Intestine) (Relative values)	1
							Corneocyte pH [lower mid] CV (%) : Female	0	Colon Apical Efflux (Intestine) (Relative values)	1
							Corneocyte thickness [lower mid] (µm) : Male	0.6	Colon Basolateral Influx (Intestine) (Relative values)	1
							Corneocyte thickness [lower mid] CV (%) : Male	4	Colon Basolateral Efflux (Intestine) (Relative values)	1
							Corneocyte thickness [lower mid] (µm) : Female	0.6	Abundance : ABCB1 (P-gp/MDR1) ET Mean	1
							Corneocyte thickness [lower mid] CV (%) : Female	4	Abundance : ABCB1 (P-gp/MDR1) ET CV (%)	65
							Corneocyte width [lower mid] (µm) : Male	27.7	Abundance : ABCB1 (P-gp/MDR1) PT Mean	0
							Corneocyte width [lower mid] CV (%) : Male	9.2	Abundance : ABCB1 (P-gp/MDR1) PT CV (%)	0
							Corneocyte width [lower mid] (µm) : Female	27.7	Abundance : ABCB1 (P-gp/MDR1) IT Mean	0
							Corneocyte width [lower mid] CV (%) : Female	9.2	Abundance : ABCB1 (P-gp/MDR1) IT CV (%)	0
							Corneocyte length [lower mid] (µm) : Male	34.2	Abundance : ABCB1 (P-gp/MDR1) UT Mean	0
							Corneocyte length [lower mid] CV (%) : Male	4.1	Abundance : ABCB1 (P-gp/MDR1) UT CV (%)	0
							Corneocyte length [lower mid] (µm) : Female	34.2	Abundance : ABCC1 (MRP1) ET Mean	1
							Corneocyte length [lower mid] CV (%) : Female	4.1	Abundance : ABCC1 (MRP1) ET CV (%)	88
							Hydration level (% water volume) [lower mid] : Male	56.75	Abundance : ABCC1 (MRP1) PT Mean	0
							Hydration level (% water volume) [lower mid] CV (%) : Male	7	Abundance : ABCC1 (MRP1) PT CV (%)	0
							Hydration level (% water volume) [lower mid] : Female	56.75	Abundance : ABCC1 (MRP1) IT Mean	0
							Hydration level (% water volume) [lower mid] CV (%) : Female	7	Abundance : ABCC1 (MRP1) IT CV (%)	0
							SC lipid viscosity [lower mid] (centipose) : Male	75	Abundance : ABCC1 (MRP1) UT Mean	0
							SC lipid viscosity [lower mid] CV (%) : Male	0	Abundance : ABCC1 (MRP1) UT CV (%)	0
							SC lipid viscosity [lower mid] (centipose) : Female	75	Abundance : ABCC2 (MRP2) ET Mean	1
							SC lipid viscosity [lower mid] CV (%) : Female	0	Abundance : ABCC2 (MRP2) ET CV (%)	79
							Corneocyte pH [bottom] : Male	6.8	Abundance : ABCC2 (MRP2) PT Mean	0
							Corneocyte pH [bottom] CV (%) : Male	0	Abundance : ABCC2 (MRP2) PT CV (%)	0
							Corneocyte pH [bottom] : Female	6.8	Abundance : ABCC2 (MRP2) IT Mean	0
							Corneocyte pH [bottom] CV (%) : Female	0	Abundance : ABCC2 (MRP2) IT CV (%)	0
							Corneocyte thickness [bottom] (µm) : Male	0.68	Abundance : ABCC2 (MRP2) UT Mean	0
							Corneocyte thickness [bottom] CV (%) : Male	4	Abundance : ABCC2 (MRP2) UT CV (%)	0
							Corneocyte thickness [bottom] (µm) : Female	0.68	Abundance : ABCC3 (MRP3) ET Mean	1
							Corneocyte thickness [bottom] CV (%) : Female	4	Abundance : ABCC3 (MRP3) ET CV (%)	64
							Corneocyte width [bottom] (µm) : Male	27.7	Abundance : ABCC3 (MRP3) PT Mean	0
							Corneocyte width [bottom] CV (%) : Male	9.2	Abundance : ABCC3 (MRP3) PT CV (%)	0
							Corneocyte width [bottom] (µm) : Female	27.7	Abundance : ABCC3 (MRP3) IT Mean	0
							Corneocyte width [bottom] CV (%) : Female	9.2	Abundance : ABCC3 (MRP3) IT CV (%)	0
							Corneocyte length [bottom] (µm) : Male	34.2	Abundance : ABCC3 (MRP3) UT Mean	0
							Corneocyte length [bottom] CV (%) : Male	4.1	Abundance : ABCC3 (MRP3) UT CV (%)	0
							Corneocyte length [bottom] (µm) : Female	34.2	Abundance : ABCC4 (MRP4) ET Mean	1
							Corneocyte length [bottom] CV (%) : Female	4.1	Abundance : ABCC4 (MRP4) ET CV (%)	106
							Hydration level (% water volume) [bottom] : Male	67.4	Abundance : ABCC4 (MRP4) PT Mean	0
							Hydration level (% water volume) [bottom] CV (%) : Male	4	Abundance : ABCC4 (MRP4) PT CV (%)	0
							Hydration level (% water volume) [bottom] : Female	67.4	Abundance : ABCC4 (MRP4) IT Mean	0
							Hydration level (% water volume) [bottom] CV (%) : Female	4	Abundance : ABCC4 (MRP4) IT CV (%)	0
							SC lipid viscosity [bottom] (centipose) : Male	75	Abundance : ABCC4 (MRP4) UT Mean	0
							SC lipid viscosity [bottom] CV (%) : Male	0	Abundance : ABCC4 (MRP4) UT CV (%)	0
							SC lipid viscosity [bottom] (centipose) : Female	75	Abundance : ABCG2 (BCRP) ET Mean	1
							SC lipid viscosity [bottom] CV (%) : Female	0	Abundance : ABCG2 (BCRP) ET CV (%)	63
							Viable Epidermis thickness (µm) : Male	46.8667	Abundance : ABCG2 (BCRP) PT Mean	0
							Viable Epidermis thickness CV (%) : Male	24	Abundance : ABCG2 (BCRP) PT CV (%)	0
							Viable Epidermis thickness (µm) : Female	46.8667	Abundance : ABCG2 (BCRP) IT Mean	0
							Viable Epidermis thickness CV (%) : Female	24	Abundance : ABCG2 (BCRP) IT CV (%)	0
							Dermis thickness (µm) : Male	1580	Abundance : ABCG2 (BCRP) UT Mean	0
							Dermis thickness CV (%) : Male	20	Abundance : ABCG2 (BCRP) UT CV (%)	0
							Dermis thickness (µm) : Female	1580	Abundance : SLC2A2 (GLUT2) ET Mean	1
							Dermis thickness CV (%) : Female	20	Abundance : SLC2A2 (GLUT2) ET CV (%)	31
							Subcutis thickness (mm) : Male	1.9	Abundance : SLC2A2 (GLUT2) PT Mean	0
							Subcutis thickness CV (%) : Male	55.72	Abundance : SLC2A2 (GLUT2) PT CV (%)	0
							Subcutis thickness (mm) : Female	1.91	Abundance : SLC2A2 (GLUT2) IT Mean	0
							Subcutis thickness CV (%) : Female	55.72	Abundance : SLC2A2 (GLUT2) IT CV (%)	0
							Muscle thickness (mm) : Male	13.2	Abundance : SLC2A2 (GLUT2) UT Mean	0
							Muscle thickness CV (%) : Male	18	Abundance : SLC2A2 (GLUT2) UT CV (%)	0
							Muscle thickness (mm) : Female	12.6	Abundance : SLC10A2 (ASBT/IBAT) ET Mean	1
							Muscle thickness CV (%) : Female	9.9	Abundance : SLC10A2 (ASBT/IBAT) ET CV (%)	43
							Dermis regional blood flow scalar : Male	2.12619	Abundance : SLC10A2 (ASBT/IBAT) PT Mean	0
							Dermis regional blood flow scalar CV (%) : Male	0	Abundance : SLC10A2 (ASBT/IBAT) PT CV (%)	0
							Dermis regional blood flow scalar : Female	2.12619	Abundance : SLC10A2 (ASBT/IBAT) IT Mean	0
							Dermis regional blood flow scalar CV (%) : Female	0	Abundance : SLC10A2 (ASBT/IBAT) IT CV (%)	0
							Subcutis regional blood flow scalar : Male	1	Abundance : SLC10A2 (ASBT/IBAT) UT Mean	0
							Subcutis regional blood flow scalar CV (%) : Male	0	Abundance : SLC10A2 (ASBT/IBAT) UT CV (%)	0
							Subcutis regional blood flow scalar : Female	1	Abundance : SLC15A1 (PEPT1) ET Mean	1
							Subcutis regional blood flow scalar CV (%) : Female	0	Abundance : SLC15A1 (PEPT1) ET CV (%)	41
							Muscle regional blood flow scalar : Male	1	Abundance : SLC15A1 (PEPT1) PT Mean	0
							Muscle regional blood flow scalar CV (%) : Male	0	Abundance : SLC15A1 (PEPT1) PT CV (%)	0
							Muscle regional blood flow scalar : Female	1	Abundance : SLC15A1 (PEPT1) IT Mean	0
							Muscle regional blood flow scalar CV (%) : Female	0	Abundance : SLC15A1 (PEPT1) IT CV (%)	0
									Abundance : SLC15A1 (PEPT1) UT Mean	0
							MPMLA - Lower Leg		Abundance : SLC15A1 (PEPT1) UT CV (%)	0
							Skin surface pH : Male	5.5	Abundance : SLC16A1 (MCT1) ET Mean	1
							Skin surface pH CV (%) : Male	11	Abundance : SLC16A1 (MCT1) ET CV (%)	75
							Skin surface pH : Female	5.5	Abundance : SLC16A1 (MCT1) PT Mean	0
							Skin surface pH CV (%) : Female	11	Abundance : SLC16A1 (MCT1) PT CV (%)	0
							Skin temperature (°C) : Male	32	Abundance : SLC16A1 (MCT1) IT Mean	0
							Skin temperature CV (%) : Male	0	Abundance : SLC16A1 (MCT1) IT CV (%)	0
							Skin temperature (°C) : Female	32	Abundance : SLC16A1 (MCT1) UT Mean	0
							Skin temperature CV (%) : Female	0	Abundance : SLC16A1 (MCT1) UT CV (%)	0
							Shape of corneocyte : Male	Cuboid (brick)	Abundance : SLCO2B1 (OATP2B1) ET Mean	1
							Shape of corneocyte : Female	Cuboid (brick)	Abundance : SLCO2B1 (OATP2B1) ET CV (%)	74
							Number of SC layers : Male	22	Abundance : SLCO2B1 (OATP2B1) PT Mean	0
							Number of SC layers CV (%) : Male	9.1	Abundance : SLCO2B1 (OATP2B1) PT CV (%)	0
							Number of SC layers : Female	22	Abundance : SLCO2B1 (OATP2B1) IT Mean	0
							Number of SC layers CV (%) : Female	9.1	Abundance : SLCO2B1 (OATP2B1) IT CV (%)	0
							Water density (gm/cm3) : Male	1	Abundance : SLCO2B1 (OATP2B1) UT Mean	0
							Water density CV (%) : Male	0	Abundance : SLCO2B1 (OATP2B1) UT CV (%)	0
							Water density (gm/cm3) : Female	1	Abundance : SLCO4C1 (OATP4C1) ET Mean	1
							Water density CV (%) : Female	0	Abundance : SLCO4C1 (OATP4C1) ET CV (%)	60
							SC lipids density (gm/cm3) : Male	0.9	Abundance : SLCO4C1 (OATP4C1) PT Mean	0
							SC lipids density CV (%) : Male	0	Abundance : SLCO4C1 (OATP4C1) PT CV (%)	0
							SC lipids density (gm/cm3) : Female	0.9	Abundance : SLCO4C1 (OATP4C1) IT Mean	0
							SC lipids density CV (%) : Female	0	Abundance : SLCO4C1 (OATP4C1) IT CV (%)	0
							SC proteins density (gm/cm3) : Male	1.37	Abundance : SLCO4C1 (OATP4C1) UT Mean	0
							SC proteins density CV (%) : Male	0	Abundance : SLCO4C1 (OATP4C1) UT CV (%)	0
							SC proteins density (gm/cm3) : Female	1.37	Abundance : SLC22A1 (OCT1) ET Mean	1
							SC proteins density CV (%) : Female	0	Abundance : SLC22A1 (OCT1) ET CV (%)	49
							Intercellular lipid thickness of SC (µm) : Male	0.091	Abundance : SLC22A1 (OCT1) PT Mean	0
							Intercellular lipid thickness of SC CV (%) : Male	0	Abundance : SLC22A1 (OCT1) PT CV (%)	0
							Intercellular lipid thickness of SC (µm) : Female	0.091	Abundance : SLC22A1 (OCT1) IT Mean	0
							Intercellular lipid thickness of SC CV (%) : Female	0	Abundance : SLC22A1 (OCT1) IT CV (%)	0
							Tortuosity of lipid diffusion pathway of SC : Male	12.7	Abundance : SLC22A1 (OCT1) UT Mean	0
							Tortuosity of lipid diffusion pathway of SC CV (%) : Male	18	Abundance : SLC22A1 (OCT1) UT CV (%)	0
							Tortuosity of lipid diffusion pathway of SC : Female	12.7	Abundance : SLC22A3 (OCT3) ET Mean	1
							Tortuosity of lipid diffusion pathway of SC CV (%) : Female	18	Abundance : SLC22A3 (OCT3) ET CV (%)	74
							Hair follicle diameter (µm) : Male	168.4	Abundance : SLC22A3 (OCT3) PT Mean	0
							Hair follicle diameter CV (%) : Male	26	Abundance : SLC22A3 (OCT3) PT CV (%)	0
							Hair follicle diameter (µm) : Female	168.4	Abundance : SLC22A3 (OCT3) IT Mean	0
							Hair follicle diameter CV (%) : Female	26	Abundance : SLC22A3 (OCT3) IT CV (%)	0
							Hair follicle density (N/cm2) : Male	14	Abundance : SLC22A3 (OCT3) UT Mean	0
							Hair follicle density CV (%) : Male	50	Abundance : SLC22A3 (OCT3) UT CV (%)	0
							Hair follicle density (N/cm2) : Female	14	Abundance : SLC22A4 (OCTN1) ET Mean	1
							Hair follicle density CV (%) : Female	50	Abundance : SLC22A4 (OCTN1) ET CV (%)	106
							Hair shaft diameter (µm) : Male	42.1	Abundance : SLC22A4 (OCTN1) PT Mean	0
							Hair shaft diameter CV (%) : Male	29	Abundance : SLC22A4 (OCTN1) PT CV (%)	0
							Hair shaft diameter (µm) : Female	42.1	Abundance : SLC22A4 (OCTN1) IT Mean	0
							Hair shaft diameter CV (%) : Female	29	Abundance : SLC22A4 (OCTN1) IT CV (%)	0
							Sebum viscosity (centipose) : Male	40	Abundance : SLC22A4 (OCTN1) UT Mean	0
							Sebum viscosity CV (%) : Male	0	Abundance : SLC22A4 (OCTN1) UT CV (%)	0
							Sebum viscosity (centipose) : Female	40	Abundance : SLC51A/B (OST-α/β) ET Mean	1
							Sebum viscosity CV (%) : Female	0	Abundance : SLC51A/B (OST-α/β) ET CV (%)	99
							Corneocyte pH [top] : Male	6.8	Abundance : SLC51A/B (OST-α/β) PT Mean	0
							Corneocyte pH [top] CV (%) : Male	0	Abundance : SLC51A/B (OST-α/β) PT CV (%)	0
							Corneocyte pH [top] : Female	6.8	Abundance : SLC51A/B (OST-α/β) IT Mean	0
							Corneocyte pH [top] CV (%) : Female	0	Abundance : SLC51A/B (OST-α/β) IT CV (%)	0
							Corneocyte thickness [top] (µm) : Male	0.87	Abundance : SLC51A/B (OST-α/β) UT Mean	0
							Corneocyte thickness [top] CV (%) : Male	9	Abundance : SLC51A/B (OST-α/β) UT CV (%)	0
							Corneocyte thickness [top] (µm) : Female	0.87	Abundance : Apical Influx (Intestine) ET Mean	1
							Corneocyte thickness [top] CV (%) : Female	9	Abundance : Apical Influx (Intestine) ET CV (%)	0
							Corneocyte width [top] (µm) : Male	29.6	Abundance : Apical Influx (Intestine) PT Mean	0
							Corneocyte width [top] CV (%) : Male	5.9	Abundance : Apical Influx (Intestine) PT CV (%)	0
							Corneocyte width [top] (µm) : Female	29.6	Abundance : Apical Influx (Intestine) IT Mean	0
							Corneocyte width [top] CV (%) : Female	5.9	Abundance : Apical Influx (Intestine) IT CV (%)	0
							Corneocyte length [top] (µm) : Male	36.4	Abundance : Apical Influx (Intestine) UT Mean	0
							Corneocyte length [top] CV (%) : Male	5.7	Abundance : Apical Influx (Intestine) UT CV (%)	0
							Corneocyte length [top] (µm) : Female	36.4	Abundance : Apical Efflux (Intestine) ET Mean	1
							Corneocyte length [top] CV (%) : Female	5.7	Abundance : Apical Efflux (Intestine) ET CV (%)	0
							Hydration level (% water volume) [top] : Male	33.9	Abundance : Apical Efflux (Intestine) PT Mean	0
							Hydration level (% water volume) [top] CV (%) : Male	9	Abundance : Apical Efflux (Intestine) PT CV (%)	0
							Hydration level (% water volume) [top] : Female	33.9	Abundance : Apical Efflux (Intestine) IT Mean	0
							Hydration level (% water volume) [top] CV (%) : Female	9	Abundance : Apical Efflux (Intestine) IT CV (%)	0
							SC lipid viscosity [top] (centipose) : Male	75	Abundance : Apical Efflux (Intestine) UT Mean	0
							SC lipid viscosity [top] CV (%) : Male	0	Abundance : Apical Efflux (Intestine) UT CV (%)	0
							SC lipid viscosity [top] (centipose) : Female	75	Abundance : Basolateral Influx (Intestine) ET Mean	1
							SC lipid viscosity [top] CV (%) : Female	0	Abundance : Basolateral Influx (Intestine) ET CV (%)	0
							Corneocyte pH [upper mid] : Male	6.8	Abundance : Basolateral Influx (Intestine) PT Mean	0
							Corneocyte pH [upper mid] CV (%) : Male	0	Abundance : Basolateral Influx (Intestine) PT CV (%)	0
							Corneocyte pH [upper mid] : Female	6.8	Abundance : Basolateral Influx (Intestine) IT Mean	0
							Corneocyte pH [upper mid] CV (%) : Female	0	Abundance : Basolateral Influx (Intestine) IT CV (%)	0
							Corneocyte thickness [upper mid] (µm) : Male	0.99	Abundance : Basolateral Influx (Intestine) UT Mean	0
							Corneocyte thickness [upper mid] CV (%) : Male	9	Abundance : Basolateral Influx (Intestine) UT CV (%)	0
							Corneocyte thickness [upper mid] (µm) : Female	0.99	Abundance : Basolateral Efflux (Intestine) ET Mean	1
							Corneocyte thickness [upper mid] CV (%) : Female	9	Abundance : Basolateral Efflux (Intestine) ET CV (%)	0
							Corneocyte width [upper mid] (µm) : Male	29.6	Abundance : Basolateral Efflux (Intestine) PT Mean	0
							Corneocyte width [upper mid] CV (%) : Male	5.9	Abundance : Basolateral Efflux (Intestine) PT CV (%)	0
							Corneocyte width [upper mid] (µm) : Female	29.6	Abundance : Basolateral Efflux (Intestine) IT Mean	0
							Corneocyte width [upper mid] CV (%) : Female	5.9	Abundance : Basolateral Efflux (Intestine) IT CV (%)	0
							Corneocyte length [upper mid] (µm) : Male	36.4	Abundance : Basolateral Efflux (Intestine) UT Mean	0
							Corneocyte length [upper mid] CV (%) : Male	5.7	Abundance : Basolateral Efflux (Intestine) UT CV (%)	0
							Corneocyte length [upper mid] (µm) : Female	36.4	Fasted Mean gastric emptying time (h)	0.4
							Corneocyte length [upper mid] CV (%) : Female	5.7	Fasted CV gastric emptying time (%)	38
							Hydration level (% water volume) [upper mid] : Male	44.6987	Fed Mean gastric emptying time (h)	1
							Hydration level (% water volume) [upper mid] CV (%) : Male	6	Fed CV gastric emptying time (%)	38
							Hydration level (% water volume) [upper mid] : Female	44.6987	Weibull Dist of transit time - alpha	2.92
							Hydration level (% water volume) [upper mid] CV (%) : Female	6	Weibull Dist of transit time - beta	4.04
							SC lipid viscosity [upper mid] (centipose) : Male	75	Mean colon transit time (h)	12
							SC lipid viscosity [upper mid] CV (%) : Male	0	CV colon transit time (%)	30
							SC lipid viscosity [upper mid] (centipose) : Female	75	Initial volume of stomach fluid (mL) - Fed	1000
							SC lipid viscosity [upper mid] CV (%) : Female	0	Initial volume of stomach fluid CV (%) - Fed	30
							Corneocyte pH [lower mid] : Male	6.8	Initial volume of stomach fluid (mL) - Fasted	50
							Corneocyte pH [lower mid] CV (%) : Male	0	Initial volume of stomach fluid CV (%) - Fasted	30
							Corneocyte pH [lower mid] : Female	6.8	Mean SITT (h)	3.33873
							Corneocyte pH [lower mid] CV (%) : Female	0	Ionic Product (Kw) (10-14 mol2/dm6)	2.4
							Corneocyte thickness [lower mid] (µm) : Male	1.13	Aqueous Diffusion Coefficients H+ (10-4 cm2/min)	62.94
							Corneocyte thickness [lower mid] CV (%) : Male	9	Aqueous Diffusion Coefficients OH- (10-4 cm2/min)	37.8
							Corneocyte thickness [lower mid] (µm) : Female	1.13	Water Concentration (mM)	55560
							Corneocyte thickness [lower mid] CV (%) : Female	9	Bicarbonate pKa 1	6.05
							Corneocyte width [lower mid] (µm) : Male	29.6	Bicarbonate pKa 2	9.79
							Corneocyte width [lower mid] CV (%) : Male	5.9	Aqueous Diffusion Coefficients 37oC (10-4 cm2/min) H2CO3	17.72
							Corneocyte width [lower mid] (µm) : Female	29.6	Aqueous Diffusion Coefficients 37oC (10-4 cm2/min) HCO3-	9.85
							Corneocyte width [lower mid] CV (%) : Female	5.9	Aqueous Diffusion Coefficients 37oC (10-4 cm2/min) CO32-	6.98
							Corneocyte length [lower mid] (µm) : Male	36.4	User Defined Intestinal Fluid Volumes?	No
							Corneocyte length [lower mid] CV (%) : Male	5.7	Fasted Jejunum I basal fluid volume (mL)	21.1
							Corneocyte length [lower mid] (µm) : Female	36.4	Fasted Jejunum II basal fluid volume (mL)	21.1
							Corneocyte length [lower mid] CV (%) : Female	5.7	Fasted Ileum I basal fluid volume (mL)	12.6
							Hydration level (% water volume) [lower mid] : Male	55.5388	Fasted Ileum II basal fluid volume (mL)	12.6
							Hydration level (% water volume) [lower mid] CV (%) : Male	5	Fasted Ileum III basal fluid volume (mL)	12.6
							Hydration level (% water volume) [lower mid] : Female	55.5388	Fasted Ileum IV basal fluid volume (mL)	12.6
							Hydration level (% water volume) [lower mid] CV (%) : Female	5	Fasted Jejunum I-Ileum IV basal fluid volume %CV (%)	37
							SC lipid viscosity [lower mid] (centipose) : Male	75	Fasted Colon basal fluid volume (mL)	13
							SC lipid viscosity [lower mid] CV (%) : Male	0	Fasted Colon basal fluid volume %CV (%)	4.4
							SC lipid viscosity [lower mid] (centipose) : Female	75	Fed Jejunum I basal fluid volume (mL)	21.1
							SC lipid viscosity [lower mid] CV (%) : Female	0	Fed Jejunum II basal fluid volume (mL)	21.1
							Corneocyte pH [bottom] : Male	6.8	Fed Ileum I basal fluid volume (mL)	12.6
							Corneocyte pH [bottom] CV (%) : Male	0	Fed Ileum II basal fluid volume (mL)	12.6
							Corneocyte pH [bottom] : Female	6.8	Fed Ileum III basal fluid volume (mL)	12.6
							Corneocyte pH [bottom] CV (%) : Female	0	Fed Ileum IV basal fluid volume (mL)	12.6
							Corneocyte thickness [bottom] (µm) : Male	1.27	Fed Jejunum I-Ileum IV basal fluid volume %CV (%)	37
							Corneocyte thickness [bottom] CV (%) : Male	9	Fed Colon basal fluid volume (mL)	13
							Corneocyte thickness [bottom] (µm) : Female	1.27	Fed Colon basal fluid volume %CV (%)	4.4
							Corneocyte thickness [bottom] CV (%) : Female	9
							Corneocyte width [bottom] (µm) : Male	29.6
							Corneocyte width [bottom] CV (%) : Male	5.9
							Corneocyte width [bottom] (µm) : Female	29.6
							Corneocyte width [bottom] CV (%) : Female	5.9
							Corneocyte length [bottom] (µm) : Male	36.4
							Corneocyte length [bottom] CV (%) : Male	5.7
							Corneocyte length [bottom] (µm) : Female	36.4
							Corneocyte length [bottom] CV (%) : Female	5.7
							Hydration level (% water volume) [bottom] : Male	66.4
							Hydration level (% water volume) [bottom] CV (%) : Male	4
							Hydration level (% water volume) [bottom] : Female	66.4
							Hydration level (% water volume) [bottom] CV (%) : Female	4
							SC lipid viscosity [bottom] (centipose) : Male	75
							SC lipid viscosity [bottom] CV (%) : Male	0
							SC lipid viscosity [bottom] (centipose) : Female	75
							SC lipid viscosity [bottom] CV (%) : Female	0
							Viable Epidermis thickness (µm) : Male	57.36
							Viable Epidermis thickness CV (%) : Male	8
							Viable Epidermis thickness (µm) : Female	57.36
							Viable Epidermis thickness CV (%) : Female	8
							Dermis thickness (µm) : Male	1240
							Dermis thickness CV (%) : Male	20
							Dermis thickness (µm) : Female	1240
							Dermis thickness CV (%) : Female	20
							Subcutis thickness (mm) : Male	9.62
							Subcutis thickness CV (%) : Male	48.31
							Subcutis thickness (mm) : Female	17.07
							Subcutis thickness CV (%) : Female	37.1
							Muscle thickness (mm) : Male	17.7
							Muscle thickness CV (%) : Male	22.67
							Muscle thickness (mm) : Female	18.84
							Muscle thickness CV (%) : Female	18.63
							Dermis regional blood flow scalar : Male	0.839286
							Dermis regional blood flow scalar CV (%) : Male	0
							Dermis regional blood flow scalar : Female	0.839286
							Dermis regional blood flow scalar CV (%) : Female	0
							Subcutis regional blood flow scalar : Male	1
							Subcutis regional blood flow scalar CV (%) : Male	0
							Subcutis regional blood flow scalar : Female	1
							Subcutis regional blood flow scalar CV (%) : Female	0
							Muscle regional blood flow scalar : Male	1
							Muscle regional blood flow scalar CV (%) : Male	0
							Muscle regional blood flow scalar : Female	1
							Muscle regional blood flow scalar CV (%) : Female	0
							MPMLA - Thigh
							Skin surface pH : Male	5.5
							Skin surface pH CV (%) : Male	11
							Skin surface pH : Female	5.5
							Skin surface pH CV (%) : Female	11
							Skin temperature (°C) : Male	32
							Skin temperature CV (%) : Male	0
							Skin temperature (°C) : Female	32
							Skin temperature CV (%) : Female	0
							Shape of corneocyte : Male	Cuboid (brick)
							Shape of corneocyte : Female	Cuboid (brick)
							Number of SC layers : Male	18
							Number of SC layers CV (%) : Male	25.3
							Number of SC layers : Female	21
							Number of SC layers CV (%) : Female	13
							Water density (gm/cm3) : Male	1
							Water density CV (%) : Male	0
							Water density (gm/cm3) : Female	1
							Water density CV (%) : Female	0
							SC lipids density (gm/cm3) : Male	0.9
							SC lipids density CV (%) : Male	0
							SC lipids density (gm/cm3) : Female	0.9
							SC lipids density CV (%) : Female	0
							SC proteins density (gm/cm3) : Male	1.37
							SC proteins density CV (%) : Male	0
							SC proteins density (gm/cm3) : Female	1.37
							SC proteins density CV (%) : Female	0
							Intercellular lipid thickness of SC (µm) : Male	0.091
							Intercellular lipid thickness of SC CV (%) : Male	0
							Intercellular lipid thickness of SC (µm) : Female	0.091
							Intercellular lipid thickness of SC CV (%) : Female	0
							Tortuosity of lipid diffusion pathway of SC : Male	12.7
							Tortuosity of lipid diffusion pathway of SC CV (%) : Male	18
							Tortuosity of lipid diffusion pathway of SC : Female	12.7
							Tortuosity of lipid diffusion pathway of SC CV (%) : Female	18
							Hair follicle diameter (µm) : Male	131.5
							Hair follicle diameter CV (%) : Male	31
							Hair follicle diameter (µm) : Female	131.5
							Hair follicle diameter CV (%) : Female	31
							Hair follicle density (N/cm2) : Male	17
							Hair follicle density CV (%) : Male	24
							Hair follicle density (N/cm2) : Female	17
							Hair follicle density CV (%) : Female	24
							Hair shaft diameter (µm) : Male	29.2
							Hair shaft diameter CV (%) : Male	41
							Hair shaft diameter (µm) : Female	29.2
							Hair shaft diameter CV (%) : Female	41
							Sebum viscosity (centipose) : Male	40
							Sebum viscosity CV (%) : Male	0
							Sebum viscosity (centipose) : Female	40
							Sebum viscosity CV (%) : Female	0
							Corneocyte pH [top] : Male	6.8
							Corneocyte pH [top] CV (%) : Male	0
							Corneocyte pH [top] : Female	6.8
							Corneocyte pH [top] CV (%) : Female	0
							Corneocyte thickness [top] (µm) : Male	0.87
							Corneocyte thickness [top] CV (%) : Male	26
							Corneocyte thickness [top] (µm) : Female	0.87
							Corneocyte thickness [top] CV (%) : Female	26
							Corneocyte width [top] (µm) : Male	34
							Corneocyte width [top] CV (%) : Male	15.1
							Corneocyte width [top] (µm) : Female	34
							Corneocyte width [top] CV (%) : Female	15.1
							Corneocyte length [top] (µm) : Male	40.7
							Corneocyte length [top] CV (%) : Male	14.6
							Corneocyte length [top] (µm) : Female	40.7
							Corneocyte length [top] CV (%) : Female	14.6
							Hydration level (% water volume) [top] : Male	33.9
							Hydration level (% water volume) [top] CV (%) : Male	9
							Hydration level (% water volume) [top] : Female	33.9
							Hydration level (% water volume) [top] CV (%) : Female	9
							SC lipid viscosity [top] (centipose) : Male	75
							SC lipid viscosity [top] CV (%) : Male	0
							SC lipid viscosity [top] (centipose) : Female	75
							SC lipid viscosity [top] CV (%) : Female	0
							Corneocyte pH [upper mid] : Male	6.8
							Corneocyte pH [upper mid] CV (%) : Male	0
							Corneocyte pH [upper mid] : Female	6.8
							Corneocyte pH [upper mid] CV (%) : Female	0
							Corneocyte thickness [upper mid] (µm) : Male	0.75
							Corneocyte thickness [upper mid] CV (%) : Male	26
							Corneocyte thickness [upper mid] (µm) : Female	0.75
							Corneocyte thickness [upper mid] CV (%) : Female	26
							Corneocyte width [upper mid] (µm) : Male	34
							Corneocyte width [upper mid] CV (%) : Male	15.1
							Corneocyte width [upper mid] (µm) : Female	34
							Corneocyte width [upper mid] CV (%) : Female	15.1
							Corneocyte length [upper mid] (µm) : Male	40.7
							Corneocyte length [upper mid] CV (%) : Male	14.6
							Corneocyte length [upper mid] (µm) : Female	40.7
							Corneocyte length [upper mid] CV (%) : Female	14.6
							Hydration level (% water volume) [upper mid] : Male	44.6987
							Hydration level (% water volume) [upper mid] CV (%) : Male	6
							Hydration level (% water volume) [upper mid] : Female	44.6987
							Hydration level (% water volume) [upper mid] CV (%) : Female	6
							SC lipid viscosity [upper mid] (centipose) : Male	75
							SC lipid viscosity [upper mid] CV (%) : Male	0
							SC lipid viscosity [upper mid] (centipose) : Female	75
							SC lipid viscosity [upper mid] CV (%) : Female	0
							Corneocyte pH [lower mid] : Male	6.8
							Corneocyte pH [lower mid] CV (%) : Male	0
							Corneocyte pH [lower mid] : Female	6.8
							Corneocyte pH [lower mid] CV (%) : Female	0
							Corneocyte thickness [lower mid] (µm) : Male	0.85
							Corneocyte thickness [lower mid] CV (%) : Male	26
							Corneocyte thickness [lower mid] (µm) : Female	0.85
							Corneocyte thickness [lower mid] CV (%) : Female	26
							Corneocyte width [lower mid] (µm) : Male	34
							Corneocyte width [lower mid] CV (%) : Male	15.1
							Corneocyte width [lower mid] (µm) : Female	34
							Corneocyte width [lower mid] CV (%) : Female	15.1
							Corneocyte length [lower mid] (µm) : Male	40.7
							Corneocyte length [lower mid] CV (%) : Male	14.6
							Corneocyte length [lower mid] (µm) : Female	40.7
							Corneocyte length [lower mid] CV (%) : Female	14.6
							Hydration level (% water volume) [lower mid] : Male	55.5388
							Hydration level (% water volume) [lower mid] CV (%) : Male	5
							Hydration level (% water volume) [lower mid] : Female	55.5388
							Hydration level (% water volume) [lower mid] CV (%) : Female	5
							SC lipid viscosity [lower mid] (centipose) : Male	75
							SC lipid viscosity [lower mid] CV (%) : Male	0
							SC lipid viscosity [lower mid] (centipose) : Female	75
							SC lipid viscosity [lower mid] CV (%) : Female	0
							Corneocyte pH [bottom] : Male	6.8
							Corneocyte pH [bottom] CV (%) : Male	0
							Corneocyte pH [bottom] : Female	6.8
							Corneocyte pH [bottom] CV (%) : Female	0
							Corneocyte thickness [bottom] (µm) : Male	0.96
							Corneocyte thickness [bottom] CV (%) : Male	26
							Corneocyte thickness [bottom] (µm) : Female	0.96
							Corneocyte thickness [bottom] CV (%) : Female	26
							Corneocyte width [bottom] (µm) : Male	34
							Corneocyte width [bottom] CV (%) : Male	15.1
							Corneocyte width [bottom] (µm) : Female	34
							Corneocyte width [bottom] CV (%) : Female	15.1
							Corneocyte length [bottom] (µm) : Male	40.7
							Corneocyte length [bottom] CV (%) : Male	14.6
							Corneocyte length [bottom] (µm) : Female	40.7
							Corneocyte length [bottom] CV (%) : Female	14.6
							Hydration level (% water volume) [bottom] : Male	66.4
							Hydration level (% water volume) [bottom] CV (%) : Male	4
							Hydration level (% water volume) [bottom] : Female	66.4
							Hydration level (% water volume) [bottom] CV (%) : Female	4
							SC lipid viscosity [bottom] (centipose) : Male	75
							SC lipid viscosity [bottom] CV (%) : Male	0
							SC lipid viscosity [bottom] (centipose) : Female	75
							SC lipid viscosity [bottom] CV (%) : Female	0
							Viable Epidermis thickness (µm) : Male	40
							Viable Epidermis thickness CV (%) : Male	19
							Viable Epidermis thickness (µm) : Female	40
							Viable Epidermis thickness CV (%) : Female	19
							Dermis thickness (µm) : Male	1240
							Dermis thickness CV (%) : Male	20
							Dermis thickness (µm) : Female	1240
							Dermis thickness CV (%) : Female	20
							Subcutis thickness (mm) : Male	9.62
							Subcutis thickness CV (%) : Male	48.31
							Subcutis thickness (mm) : Female	17.07
							Subcutis thickness CV (%) : Female	37.1
							Muscle thickness (mm) : Male	32.81
							Muscle thickness CV (%) : Male	38.03
							Muscle thickness (mm) : Female	26.32
							Muscle thickness CV (%) : Female	42.45
							Dermis regional blood flow scalar : Male	0.839286
							Dermis regional blood flow scalar CV (%) : Male	0
							Dermis regional blood flow scalar : Female	0.839286
							Dermis regional blood flow scalar CV (%) : Female	0
							Subcutis regional blood flow scalar : Male	1
							Subcutis regional blood flow scalar CV (%) : Male	0
							Subcutis regional blood flow scalar : Female	1
							Subcutis regional blood flow scalar CV (%) : Female	0
							Muscle regional blood flow scalar : Male	1
							Muscle regional blood flow scalar CV (%) : Male	0
							Muscle regional blood flow scalar : Female	1
							Muscle regional blood flow scalar CV (%) : Female	0
							MPMLA - Back
							Skin surface pH : Male	5.2
							Skin surface pH CV (%) : Male	8.4
							Skin surface pH : Female	5.2
							Skin surface pH CV (%) : Female	8.4
							Skin temperature (°C) : Male	32
							Skin temperature CV (%) : Male	0
							Skin temperature (°C) : Female	32
							Skin temperature CV (%) : Female	0
							Shape of corneocyte : Male	Cuboid (brick)
							Shape of corneocyte : Female	Cuboid (brick)
							Number of SC layers : Male	17
							Number of SC layers CV (%) : Male	23.7
							Number of SC layers : Female	18
							Number of SC layers CV (%) : Female	22.7
							Water density (gm/cm3) : Male	1
							Water density CV (%) : Male	0
							Water density (gm/cm3) : Female	1
							Water density CV (%) : Female	0
							SC lipids density (gm/cm3) : Male	0.9
							SC lipids density CV (%) : Male	0
							SC lipids density (gm/cm3) : Female	0.9
							SC lipids density CV (%) : Female	0
							SC proteins density (gm/cm3) : Male	1.37
							SC proteins density CV (%) : Male	0
							SC proteins density (gm/cm3) : Female	1.37
							SC proteins density CV (%) : Female	0
							Intercellular lipid thickness of SC (µm) : Male	0.091
							Intercellular lipid thickness of SC CV (%) : Male	0
							Intercellular lipid thickness of SC (µm) : Female	0.091
							Intercellular lipid thickness of SC CV (%) : Female	0
							Tortuosity of lipid diffusion pathway of SC : Male	12.7
							Tortuosity of lipid diffusion pathway of SC CV (%) : Male	18
							Tortuosity of lipid diffusion pathway of SC : Female	12.7
							Tortuosity of lipid diffusion pathway of SC CV (%) : Female	18
							Hair follicle diameter (µm) : Male	105.3
							Hair follicle diameter CV (%) : Male	60
							Hair follicle diameter (µm) : Female	105.3
							Hair follicle diameter CV (%) : Female	60
							Hair follicle density (N/cm2) : Male	29
							Hair follicle density CV (%) : Male	31
							Hair follicle density (N/cm2) : Female	29
							Hair follicle density CV (%) : Female	31
							Hair shaft diameter (µm) : Male	18.2
							Hair shaft diameter CV (%) : Male	37
							Hair shaft diameter (µm) : Female	18.2
							Hair shaft diameter CV (%) : Female	37
							Sebum viscosity (centipose) : Male	40
							Sebum viscosity CV (%) : Male	0
							Sebum viscosity (centipose) : Female	40
							Sebum viscosity CV (%) : Female	0
							Corneocyte pH [top] : Male	6.8
							Corneocyte pH [top] CV (%) : Male	0
							Corneocyte pH [top] : Female	6.8
							Corneocyte pH [top] CV (%) : Female	0
							Corneocyte thickness [top] (µm) : Male	0.59
							Corneocyte thickness [top] CV (%) : Male	30
							Corneocyte thickness [top] (µm) : Female	0.59
							Corneocyte thickness [top] CV (%) : Female	30
							Corneocyte width [top] (µm) : Male	29.6
							Corneocyte width [top] CV (%) : Male	5.9
							Corneocyte width [top] (µm) : Female	29.6
							Corneocyte width [top] CV (%) : Female	5.9
							Corneocyte length [top] (µm) : Male	36.4
							Corneocyte length [top] CV (%) : Male	5.7
							Corneocyte length [top] (µm) : Female	36.4
							Corneocyte length [top] CV (%) : Female	5.7
							Hydration level (% water volume) [top] : Male	33.9
							Hydration level (% water volume) [top] CV (%) : Male	9
							Hydration level (% water volume) [top] : Female	33.9
							Hydration level (% water volume) [top] CV (%) : Female	9
							SC lipid viscosity [top] (centipose) : Male	75
							SC lipid viscosity [top] CV (%) : Male	0
							SC lipid viscosity [top] (centipose) : Female	75
							SC lipid viscosity [top] CV (%) : Female	0
							Corneocyte pH [upper mid] : Male	6.8
							Corneocyte pH [upper mid] CV (%) : Male	0
							Corneocyte pH [upper mid] : Female	6.8
							Corneocyte pH [upper mid] CV (%) : Female	0
							Corneocyte thickness [upper mid] (µm) : Male	0.67
							Corneocyte thickness [upper mid] CV (%) : Male	30
							Corneocyte thickness [upper mid] (µm) : Female	0.67
							Corneocyte thickness [upper mid] CV (%) : Female	30
							Corneocyte width [upper mid] (µm) : Male	29.6
							Corneocyte width [upper mid] CV (%) : Male	5.9
							Corneocyte width [upper mid] (µm) : Female	29.6
							Corneocyte width [upper mid] CV (%) : Female	5.9
							Corneocyte length [upper mid] (µm) : Male	36.4
							Corneocyte length [upper mid] CV (%) : Male	5.7
							Corneocyte length [upper mid] (µm) : Female	36.4
							Corneocyte length [upper mid] CV (%) : Female	5.7
							Hydration level (% water volume) [upper mid] : Male	44.6987
							Hydration level (% water volume) [upper mid] CV (%) : Male	6
							Hydration level (% water volume) [upper mid] : Female	44.6987
							Hydration level (% water volume) [upper mid] CV (%) : Female	6
							SC lipid viscosity [upper mid] (centipose) : Male	75
							SC lipid viscosity [upper mid] CV (%) : Male	0
							SC lipid viscosity [upper mid] (centipose) : Female	75
							SC lipid viscosity [upper mid] CV (%) : Female	0
							Corneocyte pH [lower mid] : Male	6.8
							Corneocyte pH [lower mid] CV (%) : Male	0
							Corneocyte pH [lower mid] : Female	6.8
							Corneocyte pH [lower mid] CV (%) : Female	0
							Corneocyte thickness [lower mid] (µm) : Male	0.76
							Corneocyte thickness [lower mid] CV (%) : Male	30
							Corneocyte thickness [lower mid] (µm) : Female	0.76
							Corneocyte thickness [lower mid] CV (%) : Female	30
							Corneocyte width [lower mid] (µm) : Male	29.6
							Corneocyte width [lower mid] CV (%) : Male	5.9
							Corneocyte width [lower mid] (µm) : Female	29.6
							Corneocyte width [lower mid] CV (%) : Female	5.9
							Corneocyte length [lower mid] (µm) : Male	36.4
							Corneocyte length [lower mid] CV (%) : Male	5.7
							Corneocyte length [lower mid] (µm) : Female	36.4
							Corneocyte length [lower mid] CV (%) : Female	5.7
							Hydration level (% water volume) [lower mid] : Male	55.5388
							Hydration level (% water volume) [lower mid] CV (%) : Male	5
							Hydration level (% water volume) [lower mid] : Female	55.5388
							Hydration level (% water volume) [lower mid] CV (%) : Female	5
							SC lipid viscosity [lower mid] (centipose) : Male	75
							SC lipid viscosity [lower mid] CV (%) : Male	0
							SC lipid viscosity [lower mid] (centipose) : Female	75
							SC lipid viscosity [lower mid] CV (%) : Female	0
							Corneocyte pH [bottom] : Male	6.8
							Corneocyte pH [bottom] CV (%) : Male	0
							Corneocyte pH [bottom] : Female	6.8
							Corneocyte pH [bottom] CV (%) : Female	0
							Corneocyte thickness [bottom] (µm) : Male	0.86
							Corneocyte thickness [bottom] CV (%) : Male	30
							Corneocyte thickness [bottom] (µm) : Female	0.86
							Corneocyte thickness [bottom] CV (%) : Female	30
							Corneocyte width [bottom] (µm) : Male	29.6
							Corneocyte width [bottom] CV (%) : Male	5.9
							Corneocyte width [bottom] (µm) : Female	29.6
							Corneocyte width [bottom] CV (%) : Female	5.9
							Corneocyte length [bottom] (µm) : Male	36.4
							Corneocyte length [bottom] CV (%) : Male	5.7
							Corneocyte length [bottom] (µm) : Female	36.4
							Corneocyte length [bottom] CV (%) : Female	5.7
							Hydration level (% water volume) [bottom] : Male	66.4
							Hydration level (% water volume) [bottom] CV (%) : Male	4
							Hydration level (% water volume) [bottom] : Female	66.4
							Hydration level (% water volume) [bottom] CV (%) : Female	4
							SC lipid viscosity [bottom] (centipose) : Male	75
							SC lipid viscosity [bottom] CV (%) : Male	0
							SC lipid viscosity [bottom] (centipose) : Female	75
							SC lipid viscosity [bottom] CV (%) : Female	0
							Viable Epidermis thickness (µm) : Male	45.655
							Viable Epidermis thickness CV (%) : Male	15
							Viable Epidermis thickness (µm) : Female	45.655
							Viable Epidermis thickness CV (%) : Female	15
							Dermis thickness (µm) : Male	1240
							Dermis thickness CV (%) : Male	20
							Dermis thickness (µm) : Female	1240
							Dermis thickness CV (%) : Female	20
							Subcutis thickness (mm) : Male	6.89
							Subcutis thickness CV (%) : Male	33.55
							Subcutis thickness (mm) : Female	6.89
							Subcutis thickness CV (%) : Female	33.55
							Muscle thickness (mm) : Male	19.3
							Muscle thickness CV (%) : Male	6.22
							Muscle thickness (mm) : Female	19.3
							Muscle thickness CV (%) : Female	6.22
							Dermis regional blood flow scalar : Male	1.03512
							Dermis regional blood flow scalar CV (%) : Male	0
							Dermis regional blood flow scalar : Female	1.03512
							Dermis regional blood flow scalar CV (%) : Female	0
							Subcutis regional blood flow scalar : Male	1
							Subcutis regional blood flow scalar CV (%) : Male	0
							Subcutis regional blood flow scalar : Female	1
							Subcutis regional blood flow scalar CV (%) : Female	0
							Muscle regional blood flow scalar : Male	1
							Muscle regional blood flow scalar CV (%) : Male	0
							Muscle regional blood flow scalar : Female	1
							Muscle regional blood flow scalar CV (%) : Female	0

## Sheet: Conc Profiles CSys(CPlasma)
Summary Statistics			Mean
	From (h)	To (h)	TMax (h)	CMax (mg/L)	AUC (mg/L.h)		Please note that in this simulation the impact of non-linear binding on volume of distribution was not considered.
CPlasma (mg/L)	0	24	1.92384	2.56502	15.4881
Population Statistics
Time (h)			0	0.120067	0.244326	0.360302	0.480556	0.604243	0.720245	0.841601	0.966056	1.08665	1.20128	1.32601	1.44265	1.569	1.68688	1.80518	1.92384	2.04276	2.1619	2.28122	2.40066	2.52022	2.64905	2.76879	2.88837	3.0087	3.12858	3.2488	3.36138	3.48234	3.60318	3.72391	3.84455	3.96513	4.08577	4.20529	4.32566	4.44552	4.56614	4.68753	4.80658	4.92691	5.04691	5.16735	5.28832	5.40877	5.52947
CSys Mean (mg/L)			0	0.00672568	0.056071	0.177247	0.399001	0.696513	1.01103	1.33185	1.64121	1.91341	2.1297	2.29154	2.40464	2.48493	2.53309	2.5585	2.56502	2.55671	2.53658	2.50748	2.47237	2.43095	2.38649	2.33858	2.28909	2.23748	2.18613	2.13384	2.08229	2.03075	1.97857	1.92813	1.8782	1.829	1.78027	1.73408	1.68729	1.64186	1.59814	1.55509	1.51257	1.47214	1.43179	1.39352	1.35576	1.31805	1.28312
CSys 95th percentile			0	0.0134134	0.105897	0.309846	0.670518	1.10952	1.54769	1.95091	2.34028	2.64253	2.88011	3.0208	3.16983	3.28253	3.3548	3.40279	3.42933	3.43451	3.42239	3.3989	3.36195	3.31609	3.26605	3.20775	3.14719	3.08871	3.037	2.98107	2.92738	2.86958	2.80942	2.75164	2.69451	2.63405	2.5763	2.51967	2.46137	2.40492	2.35073	2.29531	2.2415	2.19038	2.13736	2.08715	2.03868	1.98954	1.94225
CSys 5th percentile			0	0.00261798	0.0239782	0.079734	0.192825	0.355607	0.535078	0.747594	0.942528	1.1567	1.32422	1.46322	1.57986	1.67703	1.75107	1.80692	1.84956	1.87724	1.89362	1.89768	1.87842	1.85048	1.81846	1.78329	1.74718	1.70871	1.65906	1.60495	1.54795	1.49628	1.44398	1.39157	1.34369	1.29618	1.24859	1.20257	1.15826	1.11674	1.07393	1.03542	0.997284	0.961192	0.924668	0.891395	0.858471	0.82546	0.795983
Individual Statistics
Type	Individual	Trial
Time (h)			0	0.120067	0.244326	0.360302	0.480556	0.604243	0.720245	0.841601	0.966056	1.08665	1.20128	1.32601	1.44265	1.569	1.68688	1.80518	1.92384	2.04276	2.1619	2.28122	2.40066	2.52022	2.64905	2.76879	2.88837	3.0087	3.12858	3.2488	3.36138	3.48234	3.60318	3.72391	3.84455	3.96513	4.08577	4.20529	4.32566	4.44552	4.56614	4.68753	4.80658	4.92691	5.04691	5.16735	5.28832	5.40877	5.52947
CSys (mg/L)	1	1	0	0.00581433	0.0514735	0.16034	0.364609	0.651695	0.942397	1.25123	1.54881	1.80696	1.99771	2.15011	2.24982	2.32035	2.3583	2.37528	2.37585	2.36374	2.34197	2.31295	2.27855	2.24023	2.19587	2.15271	2.10843	2.06315	2.01774	1.97218	1.92965	1.88433	1.83956	1.79542	1.75198	1.70929	1.66735	1.62661	1.58638	1.54715	1.5085	1.47044	1.43399	1.39796	1.36285	1.32844	1.29468	1.26188	1.22979
CSys (mg/L)	2	1	0	0.0064845	0.0539329	0.181353	0.403781	0.710928	1.07705	1.4046	1.77328	2.07068	2.32236	2.52018	2.67226	2.78537	2.86583	2.91935	2.95088	2.9647	2.96486	2.95421	2.93467	2.90824	2.87939	2.8441	2.80592	2.76558	2.72725	2.68365	2.6441	2.60045	2.55652	2.51647	2.47361	2.42989	2.3912	2.34932	2.30783	2.26995	2.22954	2.19042	2.1542	2.1163	2.07807	2.04451	2.00754	1.97202	1.93927
CSys (mg/L)	3	1	0	0.004947	0.04283	0.156037	0.364241	0.678027	1.02311	1.41124	1.8129	2.20389	2.53105	2.80979	3.02133	3.19526	3.32849	3.42808	3.49867	3.54407	3.56769	3.57239	3.56175	3.53792	3.50262	3.45871	3.41095	3.35309	3.29044	3.22441	3.15916	3.08978	3.01634	2.94405	2.87526	2.80109	2.72775	2.65906	2.58699	2.51534	2.44989	2.38112	2.31294	2.25099	2.18587	2.12203	2.06416	2.00388	1.94468
CSys (mg/L)	4	1	0	0.00662303	0.0556736	0.172542	0.392774	0.692806	1.01607	1.31943	1.61405	1.88282	2.07667	2.22104	2.30685	2.35808	2.37741	2.37194	2.34692	2.30857	2.25759	2.19957	2.13778	2.06917	2.00188	1.9299	1.86194	1.78996	1.72343	1.65828	1.59003	1.52861	1.46851	1.40712	1.35097	1.29757	1.24492	1.19232	1.14423	1.09801	1.0508	1.00813	0.967635	0.927943	0.888272	0.852128	0.817419	0.78197	0.750467
CSys (mg/L)	5	1	0	0.0065246	0.0563428	0.187799	0.432827	0.763424	1.09108	1.47546	1.80685	2.0765	2.31088	2.48049	2.58639	2.6608	2.69576	2.7062	2.69539	2.66974	2.63272	2.58167	2.52928	2.47266	2.41321	2.35202	2.28994	2.22068	2.15864	2.09722	2.03669	1.97724	1.91899	1.86205	1.80038	1.7463	1.69368	1.64256	1.59249	1.54404	1.49691	1.45114	1.40213	1.35916	1.31781	1.27677	1.23788	1.19924	1.16267
CSys (mg/L)	6	1	0	0.00536776	0.0438167	0.14123	0.313655	0.545055	0.795347	1.05601	1.29408	1.50518	1.67191	1.79626	1.8823	1.9429	1.97331	1.98722	1.98465	1.96995	1.94686	1.91397	1.87858	1.83765	1.79366	1.74665	1.7025	1.65411	1.6064	1.56131	1.51353	1.46983	1.42391	1.37884	1.33774	1.29503	1.25306	1.21509	1.17542	1.13963	1.10221	1.06879	1.03352	1.00183	0.969151	0.939388	0.908646	0.878614	0.851613
CSys (mg/L)	7	1	0	0.0100774	0.0873796	0.273849	0.616961	1.06017	1.52585	1.95031	2.37829	2.71696	3.00033	3.17784	3.29133	3.35393	3.37632	3.37188	3.34457	3.30061	3.2448	3.18686	3.11774	3.04497	2.97692	2.90102	2.8248	2.75568	2.68036	2.6061	2.53964	2.46678	2.39632	2.33348	2.26542	2.20503	2.14041	2.08214	2.02149	1.96132	1.90807	1.85137	1.79523	1.74681	1.6947	1.64742	1.59853	1.55025	1.5078
CSys (mg/L)	8	1	0	0.0161429	0.121048	0.339299	0.714338	1.1499	1.56557	1.9514	2.29383	2.55157	2.73317	2.82885	2.87228	2.87532	2.85134	2.80968	2.75408	2.68975	2.61962	2.54651	2.4775	2.4025	2.32729	2.25748	2.18336	2.11112	2.04419	1.97431	1.90666	1.84455	1.77945	1.71707	1.66032	1.60077	1.54345	1.49163	1.43704	1.3857	1.33802	1.28929	1.2447	1.19962	1.15527	1.11521	1.07435	1.03479	0.998621
CSys (mg/L)	9	1	0	0.00283444	0.0253919	0.0827664	0.199306	0.366188	0.554965	0.767628	0.970021	1.19018	1.34875	1.48764	1.60271	1.69505	1.76218	1.81546	1.8492	1.87068	1.88237	1.88436	1.87829	1.86617	1.84877	1.82807	1.8018	1.77543	1.74643	1.71616	1.68215	1.64954	1.61395	1.58157	1.54857	1.5153	1.47939	1.44664	1.41436	1.37966	1.34813	1.31726	1.28665	1.25447	1.22488	1.19577	1.16793	1.13794	1.1107
CSys (mg/L)	10	1	0	0.00244087	0.0228216	0.077253	0.187522	0.34695	0.518807	0.731202	0.920033	1.12931	1.30415	1.44324	1.56117	1.66228	1.74198	1.79994	1.85	1.88525	1.90737	1.92232	1.92961	1.92999	1.92528	1.91515	1.90126	1.88603	1.86648	1.84477	1.82127	1.79637	1.77211	1.74526	1.71776	1.68978	1.66146	1.63546	1.60671	1.57782	1.5493	1.52292	1.49472	1.46635	1.44104	1.41353	1.38645	1.35994	1.3356
[truncated: 153 more columns]

## Sheet: C.Profiles(Cols)(Sub)
Summary Statistics			Mean
	From (h)	To (h)	TMax (h)	CMax (mg/L)	AUC (mg/L.h)
dia	0	24	1.90556	2.56528	15.4844
Population Statistics					Individual Statistics - dia
Time	CSys Mean (mg/L) - dia	CSys 95th percentile	CSys 5th percentile		CSys (mg/L)	CSys (mg/L)	CSys (mg/L)	CSys (mg/L)	CSys (mg/L)	CSys (mg/L)	CSys (mg/L)	CSys (mg/L)	CSys (mg/L)	CSys (mg/L)
				Index	1	2	3	4	5	6	7	8	9	10
				Trial	1	1	1	1	1	1	1	1	1	1
0	0	0	0		0	0	0	0	0	0	0	0	0	0
0.0507602	0.000341654	0.000702974	0.000128373		0.000300205	0.000311905	0.00024747	0.000327629	0.0003295	0.000274406	0.000491666	0.000875862	0.000134671	0.000123221
0.100639	0.00375001	0.00760097	0.00143677		0.0032582	0.00353655	0.00260995	0.00362029	0.00363839	0.00307994	0.00573734	0.00912576	0.0015476	0.00134609
0.151282	0.0138307	0.0273667	0.0054044		0.0121385	0.0131117	0.0103058	0.0135091	0.0138335	0.0109677	0.0210155	0.0325631	0.00569935	0.00516308
0.200111	0.0330025	0.0635752	0.0133814		0.0285919	0.0315288	0.024488	0.0320546	0.0339627	0.0274134	0.0521457	0.0729266	0.0142065	0.0127063
0.252547	0.0626464	0.118004	0.0257923		0.0566386	0.0627947	0.0488243	0.0593075	0.0641833	0.0508417	0.0957984	0.136173	0.027539	0.0243632
0.302216	0.104669	0.18837	0.0458015		0.0954323	0.105932	0.0848796	0.101109	0.111018	0.0843308	0.161824	0.210089	0.0484286	0.043652
0.351537	0.164983	0.293785	0.0748287		0.149142	0.170739	0.139077	0.161336	0.170523	0.128116	0.25614	0.324586	0.0776741	0.0725007
0.406769	0.241713	0.421419	0.108537		0.228117	0.24277	0.204844	0.236779	0.257177	0.194736	0.376478	0.458188	0.113838	0.1042
0.450636	0.334525	0.567711	0.15831		0.305043	0.333534	0.304068	0.32677	0.362068	0.267647	0.52864	0.599678	0.164798	0.153001
0.503375	0.446288	0.739948	0.214092		0.413811	0.46393	0.414289	0.436085	0.484547	0.351227	0.680801	0.788341	0.223272	0.206581
0.551913	0.570405	0.925213	0.282366		0.525866	0.581204	0.546122	0.566266	0.62886	0.450379	0.857782	0.980384	0.295864	0.271323
0.604243	0.696513	1.10952	0.355607		0.651695	0.710928	0.678027	0.692806	0.763424	0.545055	1.06017	1.1499	0.366188	0.34695
0.657433	0.827045	1.27666	0.427214		0.783325	0.875558	0.820032	0.823961	0.906163	0.659937	1.22786	1.31658	0.441563	0.415473
0.702228	0.960234	1.46933	0.5034		0.896442	1.01859	0.970953	0.958005	1.05366	0.761166	1.44041	1.49299	0.521682	0.488442
0.756422	1.09635	1.65278	0.583819		1.0353	1.16589	1.13006	1.0939	1.20437	0.864227	1.6114	1.68663	0.606135	0.56556
0.806341	1.23178	1.82596	0.677648		1.16289	1.2898	1.29734	1.22974	1.35843	0.969287	1.82593	1.82599	0.69475	0.663655
0.855503	1.36051	1.98464	0.756059		1.2856	1.46144	1.46869	1.3547	1.47546	1.07322	1.98908	1.97921	0.78644	0.731202
0.905163	1.49084	2.15772	0.844412		1.40609	1.58645	1.61217	1.48725	1.62691	1.18392	2.17959	2.13098	0.87836	0.816636
0.954917	1.61328	2.30128	0.93287		1.52314	1.71761	1.78442	1.59967	1.76725	1.27218	2.33053	2.26554	0.970021	0.902474
1.00471	1.73534	2.45571	1.01304		1.63647	1.86786	1.95622	1.70995	1.88951	1.36415	2.51737	2.38034	1.04313	0.988423
1.05199	1.85105	2.58718	1.10162		1.73834	2.00175	2.10381	1.81866	2.02289	1.45768	2.6602	2.49794	1.13469	1.07456
1.10407	1.95106	2.68783	1.1755		1.83944	2.11788	2.2556	1.91801	2.12966	1.5359	2.77106	2.58611	1.20825	1.14872
1.15697	2.04677	2.79497	1.25216		1.93025	2.22483	2.39614	2.00629	2.22565	1.60722	2.89459	2.67321	1.28062	1.22887
1.20128	2.1297	2.88011	1.32422		1.99771	2.32236	2.53105	2.07667	2.31088	1.67191	3.00033	2.73317	1.34875	1.30415
1.25462	2.20204	2.94047	1.38173		2.06931	2.41079	2.6555	2.14952	2.38587	1.72996	3.07317	2.77828	1.40646	1.3615
1.30814	2.26694	3.00023	1.44134		2.1314	2.49058	2.75886	2.20183	2.45122	1.7813	3.15073	2.81628	1.46596	1.42119
1.35286	2.32141	3.04585	1.49633		2.17641	2.56223	2.85398	2.24412	2.50758	1.82588	3.20283	2.8427	1.52767	1.47068
1.40669	2.37035	3.11907	1.54213		2.22298	2.62623	2.95097	2.28156	2.55555	1.85862	3.2566	2.86247	1.56568	1.52286
1.45166	2.41338	3.17871	1.59155		2.25603	2.68309	3.03177	2.31504	2.59575	1.89182	3.29894	2.87415	1.61406	1.57313
1.50574	2.44784	3.22657	1.6304		2.28937	2.73328	3.10583	2.337	2.62876	1.916	3.32536	2.87822	1.651	1.61355
1.55091	2.47843	3.27416	1.66718		2.31232	2.77727	3.18143	2.35647	2.65516	1.9369	3.35003	2.87679	1.68681	1.65111
1.60522	2.5031	3.30833	1.7028		2.33457	2.81552	3.24064	2.36766	2.6755	1.95434	3.36372	2.87082	1.71745	1.69081
1.65056	2.5232	3.33793	1.73493		2.34909	2.84845	3.29374	2.37554	2.69029	1.96871	3.37409	2.86015	1.7465	1.72546
1.70505	2.53917	3.36557	1.76016		2.36216	2.87648	3.35093	2.37806	2.70003	1.97723	3.37755	2.84687	1.77179	1.75064
1.75053	2.55037	3.38501	1.78414		2.36974	2.89999	3.39195	2.37654	2.70519	1.98378	3.37652	2.83002	1.79339	1.77656
1.80518	2.5585	3.40279	1.80692		2.37528	2.91935	3.42808	2.37194	2.7062	1.98722	3.37188	2.80968	1.81546	1.79994
1.85078	2.56297	3.41561	1.82667		2.37722	2.9349	3.45957	2.36269	2.70449	1.98783	3.36189	2.78711	1.83014	1.82383
1.90556	2.56528	3.42747	1.84435		2.37667	2.94696	3.49009	2.3523	2.69921	1.98616	3.35093	2.76173	1.84408	1.84468
1.95126	2.56394	3.43218	1.85716		2.37406	2.95585	3.5125	2.33671	2.69084	1.98213	3.33401	2.73864	1.85563	1.85901
2.00614	2.56047	3.43525	1.86818		2.36862	2.96183	3.53102	2.32126	2.67971	1.97591	3.31819	2.71088	1.86422	1.87301
2.05192	2.55518	3.43342	1.87842		2.36237	2.96516	3.54589	2.30373	2.66613	1.96878	3.29596	2.6857	1.87284	1.88525
2.10689	2.54779	3.43171	1.88685		2.35305	2.9661	3.55873	2.28382	2.65038	1.9584	3.27647	2.65532	1.87825	1.89736
2.15273	2.53882	3.4242	1.89337		2.34393	2.96527	3.56652	2.26231	2.63272	1.94846	3.25026	2.62944	1.88192	1.90737
2.20777	2.52808	3.41673	1.89733		2.33156	2.96244	3.57113	2.23864	2.61836	1.93558	3.22802	2.59747	1.88387	1.91379
2.25367	2.51546	3.40455	1.90033		2.32019	2.9578	3.57282	2.21449	2.59789	1.92326	3.19888	2.56507	1.88459	1.91956
2.30877	2.50239	3.39307	1.89543		2.30543	2.95151	3.57177	2.18855	2.57611	1.90956	3.17464	2.53843	1.88388	1.92406
2.35471	2.48761	3.37985	1.88628		2.29231	2.94375	3.56815	2.16217	2.55319	1.89221	3.14972	2.50545	1.88143	1.92774
2.40066	2.47237	3.36195	1.87842		2.27855	2.93467	3.56175	2.13778	2.52928	1.87858	3.11774	2.4775	1.87829	1.92961
2.45583	2.45505	3.34529	1.8667		2.26127	2.92439	3.55285	2.10537	2.50455	1.86016	3.09161	2.44499	1.8747	1.93056
2.50181	2.4386	3.32448	1.85495		2.24633	2.91306	3.54219	2.08166	2.48553	1.84396	3.05839	2.41598	1.86838	1.93048
2.55702	2.42037	3.30608	1.84234		2.22783	2.90078	3.53076	2.05212	2.45965	1.82602	3.03147	2.3836	1.86228	1.9292
2.60303	2.40194	3.28307	1.82969		2.21201	2.89033	3.51674	2.02285	2.43327	1.80897	2.99747	2.35518	1.85502	1.92757
2.65828	2.38233	3.26157	1.81596		2.1926	2.87659	3.50007	1.99305	2.40648	1.79066	2.97006	2.3221	1.8469	1.92475
2.70431	2.36215	3.23615	1.80255		2.17614	2.86217	3.48204	1.96394	2.37937	1.77212	2.93561	2.28987	1.83973	1.92055
2.75034	2.34307	3.21468	1.7878		2.15946	2.84715	3.46565	1.93731	2.35202	1.75331	2.90792	2.26177	1.82996	1.91617
2.80565	2.32223	3.18754	1.7727		2.13916	2.8316	3.44467	1.90858	2.33139	1.73415	2.87327	2.22881	1.81981	1.91089
2.8517	2.30164	3.16251	1.75564		2.1221	2.81561	3.42184	1.87895	2.30377	1.71235	2.84555	2.2015	1.80854	1.90624
2.90709	2.2804	3.1376	1.74057		2.10141	2.79923	3.39918	1.84878	2.27609	1.69261	2.81789	2.16957	1.79919	1.90008
2.95317	2.25916	3.11083	1.72507		2.0841	2.78253	3.37879	1.81886	2.24837	1.674	2.78334	2.14212	1.7875	1.89196
3.0087	2.23748	3.08871	1.70871		2.06315	2.76558	3.35309	1.78996	2.22068	1.65411	2.75568	2.11112	1.77543	1.88603
3.0549	2.21665	3.06818	1.69192		2.04566	2.75184	3.32701	1.76094	2.19995	1.63545	2.72126	2.08363	1.76258	1.87822
3.101	2.19588	3.04785	1.66938		2.02819	2.73432	3.30438	1.73515	2.17238	1.61557	2.6938	2.05313	1.75203	1.86988
3.15582	2.17353	3.02474	1.64645		2.00742	2.71688	3.27663	1.70708	2.14492	1.59685	2.65977	2.02613	1.73854	1.8611
3.20138	2.1516	3.00088	1.6226		1.99015	2.6985	3.24828	1.67858	2.1176	1.5768	2.63312	1.99598	1.72474	1.85223
3.25876	2.12889	2.9763	1.59785		1.96839	2.67995	3.21877	1.65009	2.09045	1.55511	2.59966	1.97018	1.71335	1.84297
3.30447	2.10808	2.95489	1.57455		1.95113	2.66178	3.1947	1.6218	2.0702	1.53589	2.57244	1.94048	1.69899	1.83337
3.35107	2.08708	2.93071	1.55384		1.93355	2.6441	3.16521	1.5988	2.04337	1.51706	2.54605	1.9147	1.68481	1.82315
3.40701	2.06441	2.90755	1.53074		1.91253	2.62966	3.13492	1.57063	2.01675	1.49809	2.51219	1.88571	1.67054	1.81312
3.45237	2.04292	2.88248	1.50847		1.89555	2.61096	3.10463	1.54394	1.99035	1.47944	2.48654	1.85622	1.65867	1.80289
3.50958	2.02105	2.85991	1.48617		1.87421	2.5928	3.07845	1.51736	1.96419	1.46066	2.45439	1.83187	1.64431	1.79222
3.55698	1.99935	2.83535	1.46412		1.85659	2.57473	3.04858	1.49093	1.93827	1.44219	2.42796	1.80403	1.62925	1.78101
3.60318	1.97857	2.80942	1.44398		1.83956	2.55652	3.01634	1.46851	1.91899	1.42391	2.39632	1.77945	1.61395	1.77211
3.65734	1.95785	2.7871	1.42275		1.81971	2.53824	2.99072	1.44342	1.89352	1.40584	2.37098	1.75253	1.60218	1.7614
3.70425	1.93686	2.76195	1.40146		1.80258	2.52029	2.95968	1.41797	1.86831	1.38795	2.3454	1.72857	1.58747	1.75039
3.75096	1.91568	2.73788	1.38028		1.78564	2.50579	2.92776	1.39332	1.84336	1.36961	2.31471	1.70506	1.57275	1.73884
3.80643	1.89487	2.7125	1.36086		1.76565	2.48796	2.89622	1.37156	1.81868	1.35211	2.2898	1.67884	1.56075	1.72711
3.85307	1.87417	2.68952	1.33917		1.74896	2.46974	2.86934	1.34785	1.80038	1.33207	2.25983	1.65228	1.54551	1.71573
3.90848	1.85325	2.66451	1.31855		1.72927	2.45192	2.83845	1.3236	1.77617	1.31442	2.23424	1.63003	1.53005	1.7043
3.95511	1.83285	2.63835	1.29897		1.71283	2.43382	2.8057	1.30064	1.75224	1.29761	2.2106	1.60462	1.51798	1.69247
4.00081	1.81211	2.61335	1.27898		1.69684	2.41563	2.77512	1.2775	1.72864	1.28079	2.18076	1.58229	1.50329	1.68025
4.05685	1.79271	2.59261	1.26062		1.67736	2.40181	2.74872	1.25781	1.7053	1.26405	2.15719	1.55762	1.48851	1.66872
4.10219	1.77303	2.56736	1.24113		1.66174	2.38438	2.71706	1.23591	1.68787	1.24752	2.12879	1.53652	1.47356	1.65699
4.15827	1.7528	2.54209	1.22145		1.64256	2.36633	2.6859	1.21351	1.66507	1.23115	2.10501	1.51173	1.46168	1.64502
4.20529	1.73408	2.51967	1.20257		1.62661	2.34932	2.65906	1.19232	1.64256	1.21509	2.08214	1.49163	1.44664	1.63546
4.25101	1.71376	2.49475	1.18329		1.61124	2.33156	2.62826	1.17062	1.6201	1.19878	2.05466	1.46723	1.43196	1.62319
4.30764	1.69493	2.47027	1.16653		1.59234	2.3147	2.59756	1.15279	1.59792	1.18332	2.03155	1.44743	1.42022	1.61144
4.35371	1.67629	2.4486	1.14838		1.57711	2.29785	2.57193	1.13254	1.582	1.16774	2.00462	1.42416	1.40563	1.59932
4.40025	1.65733	2.42392	1.13018		1.56185	2.28061	2.54117	1.11197	1.56017	1.15244	1.98216	1.40433	1.39115	1.58748
4.45429	1.63795	2.40097	1.11245		1.54432	2.26689	2.51068	1.09242	1.53841	1.13694	1.95529	1.38221	1.3768	1.5755
4.50086	1.62013	2.37698	1.09639		1.52932	2.25035	2.48058	1.07528	1.5179	1.12219	1.93377	1.36314	1.36527	1.56351
4.5577	1.60165	2.35542	1.07945		1.51116	2.23351	2.45516	1.05655	1.49691	1.10743	1.91256	1.34089	1.35089	1.5515
4.60305	1.5833	2.33148	1.06111		1.49685	2.21669	2.4254	1.03744	1.48173	1.09005	1.88657	1.31962	1.33667	1.54203
4.65841	1.5657	2.30757	1.04561		1.47952	2.19984	2.39572	1.01905	1.46169	1.07807	1.86667	1.301	1.32541	1.53006
4.70433	1.54805	2.28812	1.02816		1.46528	2.1866	2.37118	1.0006	1.44156	1.06184	1.84031	1.28327	1.31147	1.51836
4.75126	1.5304	2.26471	1.01325		1.45084	2.17036	2.34191	0.985179	1.42156	1.04755	1.82005	1.26244	1.29755	1.50656
4.80658	1.51257	2.2415	0.997284		1.43399	2.1542	2.31294	0.967635	1.40213	1.03352	1.79523	1.2447	1.28665	1.49472
4.85237	1.49622	2.22104	0.981695		1.42019	2.1382	2.28882	0.95012	1.38722	1.02029	1.77624	1.22492	1.27309	1.48306
4.90855	1.47871	2.19859	0.966262		1.4034	2.12228	2.26103	0.9332	1.36879	1.00667	1.75647	1.20468	1.25914	1.47145
4.95484	1.4615	2.17554	0.950627		1.38971	2.1063	2.2322	0.916055	1.3497	0.992882	1.73171	1.18799	1.24868	1.45973
5.00128	1.44512	2.15377	0.937062		1.3761	2.09097	2.20515	0.902129	1.33126	0.979758	1.71319	1.16899	1.23546	1.44824
5.05547	1.42859	2.1338	0.922319		1.36039	2.07528	2.18168	0.885625	1.31285	0.967167	1.68993	1.1524	1.22181	1.43875
5.10222	1.41283	2.11322	0.907882		1.34695	2.06294	2.15436	0.869949	1.29861	0.954244	1.67108	1.13414	1.20878	1.42723
5.15902	1.39611	2.0911	0.893288		1.33077	2.04782	2.12651	0.854029	1.28081	0.941272	1.64742	1.11802	1.19871	1.41575
5.20421	1.3807	2.07168	0.880622		1.31807	2.03211	2.10405	0.840887	1.26297	0.929188	1.62978	1.0999	1.18568	1.40433
5.25145	1.36518	2.05085	0.866848		1.30487	2.01722	2.07837	0.826012	1.24544	0.916757	1.61216	1.08459	1.17303	1.39329
5.30559	1.34883	2.02926	0.852902		1.28995	2.00176	2.05177	0.810942	1.22871	0.904186	1.58963	1.06656	1.16295	1.38185
5.35211	1.33437	2.01055	0.839604		1.27723	1.987	2.02981	0.796564	1.21591	0.892208	1.57222	1.0517	1.15024	1.37084
5.40877	1.31805	1.98954	0.82546		1.26188	1.97202	2.00388	0.78197	1.19924	0.878614	1.55025	1.03479	1.13794	1.35994
5.45495	1.3035	1.96876	0.813749		1.24951	1.95708	1.97831	0.770231	1.18262	0.866939	1.53325	1.02028	1.12807	1.3487
5.50034	1.28862	1.95173	0.800714		1.23749	1.94562	1.95673	0.755985	1.1663	0.855383	1.51136	1.00374	1.11572	1.3379
5.55569	1.27422	1.93174	0.788328		1.22296	1.93088	1.93243	0.74274	1.15401	0.844046	1.4951	0.989438	1.10376	1.32686
5.60207	1.25991	1.91217	0.775843		1.2109	1.91628	1.90716	0.729227	1.13817	0.832819	1.47896	0.973324	1.09415	1.31812
5.65775	1.24491	1.89319	0.763676		1.19658	1.90208	1.88232	0.716205	1.12238	0.821697	1.45822	0.959726	1.08236	1.30752
5.70429	1.23097	1.876	0.752535		1.18474	1.88729	1.86221	0.704925	1.10688	0.810724	1.44194	0.943781	1.07053	1.29669
5.75959	1.21677	1.85764	0.740739		1.17081	1.8732	1.83862	0.692272	1.09478	0.799976	1.42224	0.930894	1.05877	1.28613
5.80553	1.20317	1.84083	0.72905		1.15937	1.86194	1.81501	0.679724	1.07965	0.789337	1.40622	0.915252	1.04976	1.27547
5.85218	1.18956	1.82446	0.717601		1.14785	1.84805	1.79562	0.667526	1.06498	0.778804	1.38704	0.902616	1.03824	1.26486
5.90765	1.1757	1.80607	0.707247		1.1343	1.83421	1.77168	0.657152	1.05046	0.768473	1.37146	0.887917	1.02681	1.25455
5.9549	1.16313	1.79008	0.69605		1.12286	1.8207	1.75266	0.645165	1.0359	0.758244	1.35635	0.875128	1.01806	1.24625
6.00021	1.1498	1.7727	0.685201		1.11204	1.80732	1.73039	0.63373	1.02459	0.748111	1.3379	0.861031	1.00685	1.23604
6.0555	1.13649	1.75497	0.674308		1.09894	1.79345	1.70795	0.622102	1.01055	0.738115	1.32313	0.848912	0.995941	1.22577
6.10138	1.12309	1.73779	0.663075		1.08819	1.78023	1.68591	0.611074	0.996415	0.726631	1.30453	0.835141	0.987275	1.21553
6.15882	1.1106	1.72207	0.653475		1.07485	1.76674	1.66748	0.601608	0.983106	0.716868	1.2901	0.823294	0.976405	1.20555
6.2049	1.09758	1.70632	0.643226		1.06428	1.75602	1.64558	0.590577	0.969339	0.707574	1.272	0.809472	0.965627	1.1953
6.25006	1.08551	1.68992	0.633131		1.05404	1.7431	1.62492	0.580069	0.955974	0.697984	1.25799	0.798223	0.957372	1.18543
6.30582	1.07334	1.67452	0.623216		1.0415	1.72986	1.60689	0.569738	0.945492	0.688578	1.24406	0.784902	0.946787	1.17558
6.3514	1.06103	1.65807	0.613506		1.03137	1.71698	1.58607	0.559342	0.932355	0.679707	1.22641	0.773875	0.936503	1.16771
6.40846	1.04871	1.64139	0.604621		1.0188	1.70392	1.56498	0.550643	0.919708	0.670595	1.21283	0.761353	0.926204	1.15804
6.45456	1.03706	1.62675	0.595117		1.00877	1.69121	1.54797	0.540791	0.907176	0.661515	1.19627	0.750397	0.918105	1.14841
6.50077	1.02544	1.61068	0.585625		0.99881	1.67842	1.52788	0.530808	0.897551	0.652624	1.18303	0.738391	0.907961	1.13889
6.55449	1.01377	1.5964	0.576652		0.987372	1.66837	1.50843	0.521421	0.885087	0.644157	1.16921	0.726134	0.89812	1.12941
6.60173	1.00219	1.58015	0.568151		0.977396	1.65543	1.48814	0.513109	0.872825	0.635425	1.15332	0.715865	0.890241	1.12017
6.65701	0.990808	1.56608	0.559277		0.96586	1.64306	1.472	0.503982	0.860366	0.62686	1.14049	0.704038	0.880398	1.11103
6.7037	0.979301	1.5508	0.550556		0.956214	1.63073	1.45312	0.494737	0.84879	0.61878	1.12428	0.693978	0.870857	1.10152
6.75999	0.968127	1.53572	0.541987		0.944704	1.61878	1.4342	0.485945	0.836961	0.610483	1.11175	0.682759	0.863191	1.0925
6.80602	0.957929	1.52186	0.533428		0.935408	1.60628	1.41868	0.477148	0.828467	0.602215	1.09926	0.673112	0.853797	1.08492
6.85218	0.947064	1.50806	0.525682		0.926173	1.59662	1.39982	0.469687	0.816377	0.594119	1.08405	0.66342	0.844384	1.07599
6.9064	0.936168	1.49319	0.516996		0.915453	1.5847	1.38135	0.461333	0.805012	0.585029	1.07197	0.652718	0.836984	1.06714
6.95301	0.925554	1.47998	0.508753		0.906321	1.57282	1.36652	0.452856	0.793727	0.577073	1.05714	0.643235	0.827716	1.05814
7.00966	0.915208	1.46558	0.500922		0.895334	1.56121	1.3487	0.444804	0.785912	0.569512	1.04571	0.632796	0.818736	1.04936
7.05588	0.904685	1.45132	0.493648		0.886477	1.54972	1.33105	0.437767	0.774847	0.561948	1.0308	0.622212	0.811517	1.04051
7.10113	0.894744	1.43804	0.486048		0.877905	1.53784	1.31606	0.430078	0.764139	0.554455	1.01927	0.613445	0.802536	1.03172
7.15685	0.884088	1.42406	0.478345		0.867443	1.52649	1.29888	0.422236	0.753258	0.546923	1.00515	0.603503	0.793832	1.02318
7.20221	0.874262	1.41027	0.470951		0.859025	1.51491	1.28239	0.414673	0.743062	0.539735	0.994317	0.594976	0.78502	1.01452
7.25807	0.865206	1.39878	0.463504		0.848761	1.50571	1.26809	0.406995	0.735371	0.532571	0.98321	0.585262	0.778247	1.00784
7.30463	0.855302	1.38523	0.456833		0.840298	1.49462	1.25154	0.400792	0.725191	0.525328	0.969407	0.576839	0.769649	0.999354
7.35199	0.845526	1.3716	0.449733		0.831764	1.48327	1.23512	0.393515	0.715148	0.518443	0.958877	0.567373	0.760995	0.990759
7.40537	0.836078	1.35931	0.442743		0.822283	1.47221	1.22131	0.38644	0.705263	0.511556	0.945394	0.559376	0.75445	0.982487
7.45215	0.826779	1.34615	0.435855		0.814044	1.46102	1.20575	0.379499	0.697375	0.504734	0.934888	0.549974	0.746253	0.974255
7.50859	0.817161	1.33291	0.429456		0.804207	1.45012	1.18965	0.373474	0.688004	0.497878	0.921985	0.542222	0.737823	0.96625
7.55439	0.808046	1.31975	0.422864		0.796321	1.43915	1.17383	0.366844	0.678403	0.491333	0.911734	0.533405	0.731483	0.957965
7.60175	0.799573	1.30925	0.416221		0.788232	1.43052	1.16103	0.360102	0.668997	0.484811	0.901114	0.525857	0.723539	0.951527
7.6554	0.790122	1.29636	0.409737		0.779197	1.41939	1.146	0.353709	0.659583	0.478216	0.888793	0.517249	0.715508	0.943578
7.70267	0.781531	1.28379	0.40289		0.771299	1.40878	1.13102	0.347191	0.652454	0.470966	0.878892	0.509708	0.709334	0.93567
7.75793	0.772687	1.27248	0.397065		0.762179	1.39847	1.1185	0.341827	0.643569	0.464578	0.866875	0.501432	0.701493	0.927946
7.8046	0.76403	1.2599	0.390891		0.754556	1.38774	1.10365	0.335735	0.634784	0.458303	0.857272	0.494363	0.693588	0.920308
7.85033	0.755556	1.24796	0.384858		0.747166	1.37751	1.08962	0.329747	0.625969	0.452214	0.847185	0.486102	0.687627	0.912413
7.90602	0.747047	1.23687	0.378896		0.738258	1.36734	1.0774	0.323726	0.617303	0.446326	0.83567	0.479405	0.680155	0.904883
7.95255	0.738953	1.22603	0.372959		0.730896	1.35916	1.0633	0.317939	0.610711	0.440205	0.82635	0.471297	0.672453	0.897213
8.00783	0.730556	1.214	0.367597		0.722247	1.34872	1.04934	0.312978	0.602219	0.434355	0.814542	0.464739	0.666677	0.889737
8.05377	0.722507	1.20323	0.361884		0.715139	1.33877	1.03758	0.307197	0.593551	0.428725	0.805458	0.457033	0.659436	0.882184
8.10036	0.714405	1.19171	0.356277		0.707995	1.32861	1.02439	0.301759	0.585283	0.42291	0.7943	0.450477	0.652109	0.876213
8.15586	0.706272	1.18017	0.350687		0.699583	1.31871	1.01083	0.29627	0.577316	0.417198	0.785694	0.443139	0.64501	0.868958
8.20308	0.698776	1.16962	0.345655		0.692494	1.30869	0.999638	0.291655	0.571304	0.411655	0.774491	0.436894	0.639324	0.861608
8.257	0.69075	1.15812	0.340298		0.684509	1.29876	0.986232	0.286301	0.563384	0.406294	0.765819	0.429777	0.632128	0.854297
8.30368	0.683228	1.14821	0.334989		0.677659	1.29115	0.973506	0.281208	0.55555	0.400722	0.757468	0.422611	0.625208	0.847194
8.3592	0.675627	1.13791	0.329791		0.669602	1.28132	0.962635	0.276114	0.547834	0.395395	0.747032	0.416606	0.619872	0.839859
8.407	0.668095	1.12709	0.324692		0.662728	1.27176	0.950271	0.271794	0.539988	0.389345	0.738693	0.410688	0.612863	0.832822
8.45307	0.660558	1.11601	0.319647		0.656186	1.26214	0.937423	0.266955	0.53466	0.384049	0.728307	0.403894	0.606148	0.825822
8.50744	0.653633	1.10606	0.314686		0.648554	1.25242	0.927175	0.262047	0.527241	0.379023	0.720384	0.398125	0.600988	0.82037
8.55457	0.646147	1.09562	0.309839		0.641994	1.24325	0.915184	0.257384	0.519953	0.373951	0.71025	0.391652	0.594312	0.813537
8.60006	0.639115	1.08597	0.305004		0.635741	1.23552	0.90319	0.252654	0.512326	0.368987	0.702349	0.385993	0.58784	0.806547
8.6553	0.631995	1.07552	0.300319		0.62822	1.22624	0.891307	0.248163	0.505185	0.364065	0.694419	0.379777	0.582662	0.799905
8.70294	0.625153	1.06613	0.296011		0.621792	1.21725	0.881417	0.244318	0.50013	0.359191	0.684942	0.373345	0.576094	0.793044
8.75825	0.618109	1.05581	0.291457		0.614428	1.20806	0.869723	0.23994	0.493118	0.354421	0.676961	0.368155	0.569786	0.786504
8.80345	0.611096	1.04591	0.286842		0.608483	1.19917	0.858583	0.235494	0.486276	0.3496	0.667699	0.362112	0.563529	0.780017
8.85875	0.604632	1.03655	0.282499		0.601276	1.18995	0.849058	0.231341	0.479515	0.345025	0.660258	0.356864	0.558531	0.774502
8.90463	0.597962	1.02668	0.278413		0.595363	1.18115	0.837892	0.22769	0.474274	0.340407	0.651236	0.351073	0.55241	0.768124
8.95148	0.591376	1.01679	0.274127		0.58938	1.17222	0.826826	0.223595	0.467841	0.335889	0.644019	0.346102	0.546339	0.761553
9.00691	0.585128	1.00874	0.269901		0.582383	1.16517	0.81755	0.219576	0.461479	0.331408	0.636387	0.340449	0.541624	0.755251
9.05423	0.578578	0.999272	0.265708		0.576466	1.15648	0.807123	0.215583	0.455072	0.326971	0.627753	0.335597	0.535726	0.749
9.10798	0.571993	0.98964	0.261602		0.569839	1.14772	0.796436	0.21167	0.448784	0.322629	0.620581	0.329937	0.529706	0.742632
9.15514	0.565977	0.980889	0.2578		0.564073	1.13901	0.787633	0.208349	0.443729	0.31824	0.611953	0.325328	0.525022	0.736431
9.20062	0.559667	0.971572	0.253599		0.558574	1.13055	0.777266	0.204648	0.437781	0.313428	0.605111	0.31987	0.519272	0.730175
9.25707	0.553357	0.962111	0.249632		0.551816	1.12175	0.766998	0.200877	0.43166	0.309222	0.598347	0.315353	0.513568	0.723981
9.30281	0.5472	0.952973	0.245762		0.546405	1.11336	0.756946	0.197293	0.425604	0.305002	0.590193	0.310226	0.509016	0.717958
9.35054	0.54172	0.945665	0.242316		0.540802	1.10693	0.748565	0.194246	0.4197	0.301067	0.583615	0.305742	0.503437	0.713102
9.40585	0.535575	0.936539	0.238591		0.534396	1.0985	0.738587	0.190781	0.415158	0.297025	0.575427	0.300831	0.497903	0.707143
9.45102	0.529999	0.928409	0.234837		0.529228	1.09033	0.730508	0.187296	0.409348	0.292943	0.569036	0.296541	0.493603	0.701154
9.50673	0.523856	0.919529	0.231242		0.52291	1.08194	0.721027	0.183946	0.403788	0.289048	0.560949	0.291615	0.488227	0.695112
9.55233	0.518178	0.910905	0.227712		0.5178	1.07399	0.711577	0.180584	0.398295	0.285312	0.554697	0.287498	0.482741	0.689284
9.60932	0.512469	0.902268	0.224419		0.511468	1.0661	0.702024	0.177729	0.392767	0.281483	0.548481	0.282673	0.47847	0.683488
9.65445	0.507181	0.895053	0.220959		0.506527	1.05929	0.69432	0.174582	0.388561	0.277642	0.54102	0.278797	0.47323	0.677848
9.701	0.501707	0.886811	0.2176		0.501469	1.05154	0.685477	0.171406	0.382983	0.27406	0.534804	0.274143	0.468031	0.673156
9.75628	0.496088	0.878295	0.214165		0.495531	1.04348	0.676399	0.16833	0.377842	0.270381	0.527359	0.270186	0.46388	0.667492
9.80221	0.490811	0.870676	0.210717		0.490651	1.03578	0.668887	0.165637	0.372563	0.266664	0.521428	0.265815	0.458796	0.661897
9.85905	0.485342	0.8625	0.207353		0.484668	1.02811	0.660091	0.16269	0.368528	0.263119	0.514189	0.261941	0.453752	0.656334
9.90429	0.479993	0.854297	0.203814		0.479972	1.02032	0.651379	0.159742	0.363398	0.259096	0.508659	0.257678	0.448785	0.650902
9.95152	0.474881	0.847405	0.200595		0.475105	1.01257	0.642835	0.156866	0.358317	0.255644	0.502964	0.254042	0.444936	0.645532
10.0054	0.469571	0.840769	0.197091		0.469626	1.00505	0.635827	0.153984	0.353299	0.252226	0.496008	0.249778	0.439936	0.639976
10.0521	0.464682	0.835052	0.194238		0.464922	0.998991	0.627204	0.151602	0.348504	0.248875	0.49049	0.246347	0.4352	0.634683
10.1076	0.459577	0.828457	0.190906		0.459392	0.991409	0.620335	0.148904	0.343765	0.245557	0.483606	0.242242	0.431269	0.629292
10.1555	0.454812	0.822483	0.187852		0.45467	0.984052	0.612318	0.146167	0.340095	0.24227	0.478212	0.2388	0.426531	0.625009
10.2015	0.449715	0.816042	0.184641		0.45018	0.976563	0.604229	0.143569	0.33536	0.239029	0.471601	0.234841	0.421934	0.619848
10.2552	0.444843	0.809653	0.181681		0.445014	0.969299	0.59631	0.140939	0.330541	0.235854	0.466354	0.231476	0.418116	0.61453
10.3024	0.440002	0.803252	0.178819		0.440503	0.961833	0.589597	0.13881	0.326109	0.232711	0.459792	0.227718	0.413519	0.609431
10.3576	0.435231	0.797732	0.17568		0.435291	0.956019	0.581859	0.136238	0.321549	0.2296	0.454603	0.223887	0.408991	0.604271
10.4051	0.43065	0.791486	0.172936		0.430858	0.948863	0.574412	0.133835	0.318064	0.226549	0.449553	0.220725	0.4045	0.599136
10.4511	0.426027	0.785321	0.169952		0.4266	0.941736	0.568044	0.131353	0.31364	0.223529	0.443163	0.21713	0.400926	0.594146
10.5057	0.421404	0.779204	0.167468		0.42162	0.934824	0.560564	0.129353	0.309254	0.220537	0.438222	0.214052	0.396611	0.589001
10.551	0.416973	0.7735	0.16461		0.417522	0.927628	0.553045	0.127028	0.304925	0.217586	0.433311	0.210543	0.393026	0.585121
10.6068	0.412549	0.767566	0.161955		0.412529	0.920825	0.546978	0.124718	0.301897	0.214696	0.427417	0.207468	0.388708	0.58025
10.6536	0.408123	0.761624	0.159391		0.408393	0.914059	0.539964	0.122454	0.297652	0.211835	0.422504	0.204536	0.384519	0.575313
10.7003	0.403643	0.75625	0.156839		0.404301	0.908215	0.532734	0.120532	0.293526	0.208571	0.416622	0.201213	0.380199	0.570515
10.7566	0.399375	0.750389	0.154146		0.39942	0.901574	0.526943	0.118391	0.289439	0.205742	0.411935	0.197847	0.376849	0.565608
10.8026	0.394958	0.744487	0.151717		0.395478	0.894657	0.519981	0.116209	0.285283	0.202967	0.406215	0.195116	0.372723	0.560947
10.8573	0.39074	0.738689	0.149091		0.390844	0.888057	0.513113	0.114135	0.282486	0.200348	0.401848	0.191815	0.368631	0.556127
10.9029	0.386541	0.733011	0.146741		0.387026	0.881488	0.506383	0.112049	0.278566	0.19766	0.396183	0.189142	0.365373	0.551539
10.9603	0.382376	0.727286	0.144233		0.382261	0.874803	0.500858	0.110058	0.274514	0.194981	0.391852	0.186003	0.36144	0.546986
11.0063	0.378234	0.721887	0.142093		0.378486	0.868158	0.494111	0.108351	0.270693	0.192359	0.386353	0.183333	0.357385	0.543113
11.0525	0.374272	0.716331	0.139682		0.374735	0.861716	0.487816	0.106414	0.266908	0.189861	0.382054	0.180344	0.354239	0.538638
11.1078	0.370516	0.711386	0.137468		0.370298	0.856499	0.482336	0.104469	0.264239	0.187285	0.377791	0.1778	0.350421	0.534025
11.1533	0.366423	0.705881	0.135108		0.366686	0.850108	0.476011	0.10255	0.26056	0.184759	0.372569	0.174901	0.346486	0.529603
11.2086	0.362539	0.700371	0.13313		0.362346	0.843681	0.469619	0.100996	0.256894	0.182375	0.368423	0.172406	0.343433	0.525215
11.2562	0.35859	0.694789	0.130828		0.358639	0.837185	0.464461	0.0991585	0.253333	0.179928	0.363239	0.169536	0.339672	0.520748
11.3022	0.354855	0.689458	0.128765		0.355097	0.831053	0.458367	0.0973789	0.250556	0.17749	0.35914	0.167125	0.335942	0.516398
11.3567	0.350977	0.683959	0.126544		0.350959	0.824644	0.452471	0.0956044	0.247158	0.175102	0.35515	0.164359	0.33231	0.51201
11.402	0.347399	0.679277	0.124544		0.347551	0.819687	0.44747	0.0938912	0.243805	0.172421	0.350102	0.162009	0.32939	0.507664
11.4579	0.343743	0.674468	0.122544		0.343389	0.813676	0.441461	0.0924108	0.240422	0.170484	0.346198	0.159373	0.325692	0.504324
11.5047	0.339968	0.669081	0.120592		0.339938	0.807393	0.435745	0.0907465	0.236922	0.168185	0.341465	0.15707	0.322183	0.500033
11.5507	0.336485	0.663952	0.118536		0.336589	0.801488	0.431051	0.0890793	0.233626	0.165615	0.337662	0.154538	0.319347	0.495852
11.6075	0.332883	0.658677	0.11666		0.332486	0.795335	0.425341	0.0874924	0.231265	0.163406	0.33378	0.15231	0.315759	0.491651
11.6527	0.329248	0.653545	0.11479		0.329263	0.789473	0.419652	0.0861407	0.228054	0.161186	0.329133	0.149807	0.312363	0.487411
11.7084	0.325854	0.648496	0.112961		0.325336	0.783638	0.415084	0.0845573	0.224879	0.159066	0.325429	0.147676	0.30955	0.483322
11.7539	0.322271	0.643394	0.111024		0.322165	0.777688	0.409605	0.0830539	0.221716	0.156954	0.320911	0.14521	0.306151	0.479257
11.8005	0.319134	0.639336	0.109291		0.318938	0.77297	0.404231	0.0815326	0.219326	0.154819	0.317461	0.143219	0.30284	0.476004
11.8561	0.315644	0.6344	0.107417		0.315144	0.767265	0.398911	0.0800807	0.216247	0.152789	0.312985	0.140829	0.300179	0.472009
11.9038	0.312387	0.62941	0.105819		0.311909	0.761443	0.394399	0.078813	0.213313	0.150758	0.309563	0.138825	0.296811	0.468036
11.9591	0.308929	0.624523	0.104031		0.308214	0.755769	0.389221	0.0774229	0.210419	0.148747	0.305219	0.136552	0.293612	0.464112
12.0043	0.305679	0.619611	0.102356		0.305234	0.75003	0.384253	0.0759867	0.207499	0.146726	0.301822	0.134586	0.290447	0.46021
12.0514	0.302606	0.614765	0.100625		0.302146	0.744336	0.379949	0.0746505	0.205196	0.144797	0.298455	0.132372	0.287759	0.456399
12.1056	0.299313	0.610032	0.0990352		0.29864	0.738814	0.374969	0.0732883	0.20242	0.142874	0.294329	0.130504	0.284663	0.452632
12.1521	0.296301	0.60582	0.0974219		0.29566	0.734343	0.370747	0.0721482	0.199598	0.14093	0.291054	0.128312	0.281478	0.448738
12.2077	0.293055	0.601136	0.0957626		0.292138	0.728863	0.365881	0.0708387	0.196826	0.138793	0.286958	0.126225	0.279002	0.445024
12.2552	0.289962	0.596402	0.0942403		0.28916	0.723348	0.361197	0.0695636	0.194086	0.13691	0.283721	0.124401	0.275986	0.441244
12.3003	0.286959	0.591984	0.0927663		0.286365	0.717773	0.35636	0.0682997	0.191964	0.13506	0.279847	0.12267	0.273011	0.438242
12.356	0.284008	0.587466	0.0912693		0.282945	0.712522	0.352488	0.067226	0.189292	0.133265	0.27658	0.120655	0.27049	0.434621
12.4017	0.281001	0.58276	0.0898221		0.280176	0.707015	0.34776	0.0660264	0.186634	0.13153	0.273496	0.118906	0.267576	0.430893
12.4585	0.278016	0.578816	0.0882894		0.276763	0.70277	0.343244	0.0648192	0.184103	0.129726	0.269757	0.116975	0.264691	0.427317
12.5037	0.27521	0.574298	0.0867721		0.27408	0.697516	0.339534	0.0636676	0.181605	0.128001	0.266752	0.115011	0.26224	0.423698
12.551	0.272297	0.5698	0.0854186		0.271298	0.692284	0.334986	0.0624971	0.179663	0.126342	0.262948	0.113434	0.259419	0.420097
12.6048	0.269382	0.565411	0.0840505		0.268173	0.687168	0.330526	0.0615593	0.177097	0.124628	0.260014	0.11154	0.256516	0.416597
12.6515	0.266689	0.560996	0.0827069		0.265484	0.682093	0.326966	0.0604341	0.174701	0.122944	0.257088	0.109929	0.254261	0.412988
12.7071	0.263823	0.556924	0.0812956		0.262327	0.676916	0.322647	0.0593238	0.172264	0.12131	0.253518	0.10815	0.251511	0.410267
12.7539	0.261087	0.552612	0.0800048		0.259692	0.67187	0.318415	0.0582662	0.169873	0.11973	0.250794	0.106574	0.2488	0.406852
12.8098	0.258315	0.548249	0.0787268		0.256574	0.666771	0.314226	0.0573621	0.168143	0.118088	0.247257	0.104839	0.246503	0.40339
12.8553	0.255786	0.544536	0.0774947		0.254075	0.662772	0.310698	0.0563326	0.165678	0.116518	0.244554	0.10336	0.243847	0.400025
12.9007	0.253014	0.540271	0.0761494		0.251605	0.657833	0.306739	0.0553061	0.163371	0.114735	0.241122	0.101624	0.241218	0.396584
12.9565	0.250343	0.536048	0.0749759		0.248596	0.65283	0.302673	0.0543149	0.161077	0.113448	0.238439	0.100228	0.238505	0.393315
13.0031	0.247749	0.531849	0.0736721		0.246107	0.64796	0.299316	0.0533112	0.158892	0.111915	0.235081	0.0985576	0.236414	0.389936
13.0598	0.245216	0.527971	0.0725934		0.243115	0.643057	0.295297	0.0524958	0.15724	0.110198	0.232519	0.0971572	0.233769	0.387309
13.106	0.2427	0.523799	0.071338		0.240704	0.638088	0.292053	0.0515313	0.15506	0.108735	0.229931	0.0955463	0.231241	0.384112
13.1512	0.240154	0.519686	0.0702169		0.238374	0.633312	0.288221	0.0506133	0.152846	0.107284	0.226696	0.0941769	0.229208	0.38081
13.207	0.23761	0.515658	0.0690176		0.235525	0.628556	0.284513	0.0496838	0.150777	0.105848	0.224138	0.0926479	0.226737	0.377672
13.2523	0.235171	0.512107	0.0680039		0.233237	0.624746	0.280662	0.0489153	0.148675	0.104442	0.221078	0.0913344	0.224188	0.374438
13.3082	0.232818	0.508139	0.066836		0.230443	0.620068	0.27759	0.0480456	0.147156	0.103021	0.218497	0.089802	0.222223	0.371337
13.3548	0.230421	0.504193	0.0657925		0.228141	0.61541	0.273995	0.0471656	0.145118	0.101673	0.216061	0.0885587	0.219827	0.36826
13.4021	0.227943	0.500304	0.0646681		0.225823	0.610902	0.270401	0.0463256	0.142989	0.100312	0.213107	0.0870868	0.217355	0.365128
13.4556	0.2256	0.496334	0.063642		0.22324	0.606181	0.267453	0.0454737	0.140999	0.0989804	0.210733	0.0858477	0.21501	0.362077
13.503	0.223279	0.492512	0.062617		0.220965	0.601749	0.263875	0.0447881	0.139582	0.0976601	0.207728	0.084408	0.213038	0.359
13.5583	0.221066	0.489384	0.0616234		0.218349	0.598034	0.260371	0.0439573	0.137645	0.0963526	0.20541	0.0832152	0.210735	0.356589
13.6042	0.218781	0.485576	0.0605897		0.216198	0.593548	0.257558	0.0431843	0.135708	0.0950729	0.202612	0.081863	0.208455	0.353611
13.6508	0.21656	0.481811	0.0596347		0.21404	0.589165	0.254179	0.0423963	0.133826	0.0937795	0.200278	0.0807039	0.20663	0.350601
13.7063	0.21421	0.478103	0.0586221		0.211493	0.584821	0.250833	0.0416364	0.131915	0.0925521	0.197488	0.0793824	0.204307	0.34767
13.7516	0.212091	0.474331	0.0577457		0.20944	0.580374	0.247996	0.0409793	0.130601	0.0911218	0.195332	0.0782381	0.2021	0.344724
13.8075	0.209886	0.470614	0.056761		0.206931	0.576047	0.24474	0.0402416	0.128787	0.0898781	0.193196	0.0769514	0.200333	0.341751
13.8542	0.207668	0.466914	0.0558698		0.204854	0.571665	0.241616	0.0395104	0.127004	0.0887185	0.190485	0.0758647	0.19808	0.338885
13.9009	0.205505	0.463245	0.0549043		0.202803	0.567328	0.238415	0.0387996	0.125245	0.0875275	0.188365	0.0745877	0.195943	0.336034
13.9572	0.203561	0.460371	0.0540979		0.200353	0.563967	0.235778	0.0381953	0.123841	0.0863243	0.185713	0.0735343	0.194147	0.333753
14.0033	0.201459	0.456748	0.0531747		0.198376	0.559672	0.232673	0.037497	0.122175	0.0851765	0.183689	0.0723363	0.192047	0.330952
14.058	0.199308	0.453206	0.0523469		0.196053	0.555511	0.229597	0.0368308	0.120467	0.0840756	0.181102	0.071311	0.18997	0.328166
14.1035	0.197289	0.449611	0.0514483		0.194139	0.551226	0.227118	0.0361537	0.118796	0.0829474	0.179089	0.0701417	0.187859	0.325415
14.1502	0.195296	0.446156	0.0506341		0.192194	0.547183	0.224077	0.0355114	0.117124	0.0818152	0.177068	0.0691174	0.186189	0.322679
14.2057	0.193238	0.442642	0.0498252		0.189908	0.542979	0.221088	0.0349603	0.115855	0.0807597	0.17465	0.0679934	0.184178	0.320007
14.2533	0.191376	0.439656	0.04904		0.187967	0.539711	0.218669	0.034318	0.114277	0.0796755	0.172612	0.0670335	0.182134	0.317366
14.3086	0.189412	0.436467	0.0481988		0.18574	0.535748	0.21583	0.0337062	0.112717	0.0785803	0.170251	0.0659119	0.180514	0.315124
14.3538	0.187464	0.43303	0.0473853		0.183939	0.531627	0.213	0.0331047	0.111152	0.0775355	0.168353	0.0648394	0.178567	0.312523
14.4091	0.185602	0.429723	0.0466309		0.18176	0.527726	0.210637	0.0324999	0.109612	0.0765333	0.166478	0.0639021	0.17693	0.309943
14.455	0.183668	0.42639	0.045889		0.179971	0.523848	0.207833	0.0319938	0.108438	0.0753327	0.164104	0.062872	0.175016	0.307275
14.5018	0.181803	0.423023	0.0451658		0.178163	0.519803	0.205184	0.0314204	0.106883	0.0744757	0.162273	0.0619657	0.173123	0.304736
14.5573	0.179898	0.419742	0.0444461		0.176047	0.515978	0.202878	0.0308398	0.105445	0.0733379	0.160063	0.0610761	0.1712	0.302122
14.6045	0.178142	0.416829	0.0436975		0.17426	0.512731	0.200217	0.0302936	0.103971	0.0723602	0.158219	0.0600802	0.169678	0.299615
14.6583	0.176253	0.413606	0.0429802		0.172254	0.508948	0.197583	0.0298101	0.102528	0.0713917	0.156015	0.0590769	0.167845	0.297077
14.7052	0.17453	0.4104	0.0423235		0.170524	0.505184	0.195364	0.029279	0.101404	0.0704365	0.154311	0.0582667	0.165983	0.294552
14.7511	0.172739	0.407188	0.0415902		0.168846	0.501353	0.192875	0.0287414	0.09999	0.0695008	0.152183	0.0572943	0.164507	0.292098
14.8075	0.170991	0.404204	0.0409422		0.166803	0.497544	0.190319	0.02823	0.0986275	0.0685747	0.150482	0.0564794	0.162732	0.290122
14.8533	0.169234	0.401066	0.0402447		0.165163	0.493852	0.187737	0.0277184	0.0972815	0.0676579	0.148808	0.0555546	0.160908	0.28766
14.9005	0.167546	0.397919	0.0396461		0.163491	0.490091	0.18568	0.0272846	0.0959303	0.0667588	0.146712	0.0547546	0.159496	0.285265
14.9545	0.165848	0.394821	0.0389734		0.161602	0.486443	0.18328	0.0267987	0.0949073	0.0658689	0.145113	0.0538537	0.157771	0.282838
15.0012	0.16419	0.392148	0.0383604		0.159983	0.483515	0.180858	0.0263059	0.0935883	0.0649872	0.14307	0.0530937	0.156018	0.280479
15.0567	0.162504	0.389017	0.0377016		0.15808	0.479795	0.1789	0.0258377	0.0922461	0.0641177	0.141479	0.0522019	0.154315	0.278066
15.1044	0.160902	0.386051	0.037153		0.15646	0.476278	0.176478	0.0254286	0.0910052	0.0632659	0.139883	0.0514827	0.152961	0.275774
15.1504	0.159254	0.383175	0.0365146		0.154914	0.472609	0.174161	0.0249815	0.089733	0.062423	0.137973	0.0506106	0.151263	0.273867
15.2049	0.157692	0.380232	0.035947		0.15311	0.469143	0.172286	0.0245256	0.0888232	0.0615884	0.136362	0.0499065	0.149614	0.271563
15.252	0.156072	0.377326	0.0353364		0.151562	0.465694	0.170025	0.024086	0.0875176	0.0606273	0.134498	0.0490869	0.148301	0.269321
15.3061	0.154508	0.37465	0.0347706		0.149804	0.462723	0.167786	0.0236397	0.0862975	0.0598096	0.132998	0.048375	0.146639	0.267006
15.3527	0.152963	0.371797	0.0342188		0.148308	0.459336	0.165923	0.0232792	0.0851215	0.0590379	0.131184	0.0475896	0.14505	0.264805
15.4093	0.151425	0.368838	0.0336828		0.146507	0.455812	0.163719	0.0228562	0.0842354	0.0582458	0.129641	0.0469154	0.143779	0.262538
15.4555	0.149898	0.366012	0.0331117		0.145054	0.452452	0.16162	0.022445	0.0830663	0.0574565	0.128195	0.0461487	0.142182	0.260363
15.5008	0.148362	0.363202	0.0325937		0.143647	0.449108	0.159455	0.0220415	0.0819109	0.0566836	0.126449	0.0454908	0.140631	0.258206
15.5565	0.146889	0.360338	0.0320557		0.141934	0.445698	0.157722	0.0216914	0.0807724	0.0559475	0.124992	0.0447231	0.139396	0.25601
15.6019	0.145414	0.357728	0.0315624		0.140553	0.442376	0.155637	0.0213061	0.0796139	0.0551885	0.123251	0.044098	0.137849	0.254269
15.6585	0.143943	0.354936	0.031014		0.138848	0.439021	0.153891	0.0209144	0.0785431	0.0544442	0.121905	0.0433581	0.136346	0.252165
15.7055	0.14256	0.352523	0.030534		0.137443	0.436387	0.151926	0.0205428	0.0777346	0.0537417	0.120224	0.0427455	0.13483	0.250023
15.7516	0.141148	0.349795	0.0300129		0.136087	0.433135	0.149913	0.0201642	0.0766599	0.0530206	0.11888	0.0420502	0.133635	0.247935
15.8063	0.139693	0.347036	0.0295679		0.134493	0.429846	0.147893	0.0198524	0.0755328	0.0523021	0.117557	0.0414424	0.132187	0.245825
15.8518	0.138281	0.344317	0.0290735		0.133181	0.426582	0.146303	0.0194985	0.0744798	0.0515986	0.115902	0.0407763	0.130724	0.24377
15.9082	0.136928	0.341647	0.0286204		0.131569	0.423418	0.144369	0.0191506	0.0737346	0.0509285	0.114638	0.0401947	0.129574	0.241704
15.954	0.135502	0.338935	0.0281275		0.130278	0.420193	0.142476	0.0188007	0.0727001	0.0502376	0.113024	0.0395268	0.12816	0.239619
16.0016	0.134214	0.336505	0.0276913		0.128946	0.417067	0.140897	0.0184644	0.0716911	0.04956	0.111768	0.0389687	0.126737	0.238039
16.0569	0.132888	0.33423	0.0272384		0.127418	0.414553	0.139018	0.0181762	0.0706939	0.0488029	0.110223	0.0383144	0.125625	0.236057
16.1022	0.131561	0.331553	0.0267737		0.126183	0.411359	0.137194	0.0178403	0.0699218	0.0481519	0.108998	0.0376923	0.124255	0.234012
16.1575	0.130255	0.329013	0.0263595		0.124688	0.408349	0.135712	0.0175244	0.0689724	0.0474976	0.107726	0.0371579	0.122874	0.232047
16.2034	0.128945	0.326399	0.0259427		0.123461	0.405195	0.133932	0.0172055	0.0680342	0.046873	0.106252	0.0366214	0.121784	0.230094
16.2502	0.127659	0.3239	0.0255285		0.12222	0.402229	0.132134	0.0169375	0.0670896	0.0462506	0.105068	0.0360287	0.120464	0.228165
16.3056	0.126353	0.321342	0.0251212		0.120769	0.399148	0.130683	0.0166264	0.066162	0.0456213	0.103634	0.0355037	0.119132	0.226247
16.3529	0.125188	0.319181	0.0246984		0.119543	0.39675	0.129018	0.0163306	0.0654174	0.0450232	0.102416	0.0349257	0.118083	0.224373
16.4067	0.123922	0.316735	0.024272		0.118166	0.39382	0.127309	0.0160347	0.0645397	0.0444249	0.101273	0.03434	0.116794	0.222521
16.4535	0.122695	0.31443	0.0239157		0.11698	0.390913	0.125606	0.0157837	0.0636374	0.0438323	0.0998936	0.0338547	0.115498	0.220949
16.509	0.121491	0.311976	0.0235135		0.115589	0.387944	0.124238	0.0155026	0.0627446	0.0432366	0.0987429	0.0333046	0.114485	0.219126
16.5558	0.120259	0.309571	0.0231445		0.114427	0.385052	0.122598	0.0152175	0.0618738	0.0426681	0.0973673	0.032833	0.113236	0.217317
16.6016	0.119069	0.30712	0.0227536		0.113303	0.382127	0.12099	0.0149467	0.0612038	0.0421015	0.0963043	0.0322954	0.111977	0.215446
16.6573	0.117862	0.304725	0.022393		0.111952	0.379227	0.11967	0.0146719	0.0603467	0.0415287	0.0949759	0.0318298	0.110755	0.213666
16.7027	0.116708	0.302352	0.022014		0.110861	0.376413	0.118047	0.0144111	0.0595274	0.0409842	0.0939145	0.0313064	0.109782	0.211833
16.7592	0.115548	0.300309	0.0216922		0.109518	0.374137	0.116497	0.0141877	0.0587177	0.040344	0.0925682	0.0308643	0.108567	0.210075
16.805	0.114423	0.297973	0.0213185		0.108444	0.371346	0.115245	0.0139334	0.0579024	0.039799	0.0915616	0.0303448	0.107362	0.208296
16.8528	0.113326	0.295631	0.0209837		0.10733	0.368535	0.113722	0.0136752	0.057282	0.0392701	0.0905637	0.0299162	0.106437	0.206526
16.9081	0.112177	0.293453	0.0206317		0.106058	0.365689	0.112231	0.013434	0.0564591	0.0387586	0.0892886	0.0294288	0.105256	0.205163
16.9532	0.111092	0.291162	0.0203273		0.105033	0.362952	0.110968	0.0132219	0.0557016	0.038227	0.0882958	0.0290117	0.104089	0.20342
17.0004	0.109983	0.288886	0.0199824		0.10397	0.360226	0.109511	0.0129841	0.0549229	0.0377188	0.0870758	0.028536	0.103194	0.201693
17.0545	0.108934	0.28693	0.0196665		0.102764	0.358043	0.108109	0.0127507	0.0541523	0.0372299	0.0861075	0.0281192	0.102047	0.200014
17.1011	0.107884	0.28469	0.0193332		0.101739	0.355362	0.10691	0.0125187	0.0535717	0.0367248	0.0851026	0.027662	0.100933	0.198312
17.1577	0.106796	0.282477	0.0190325		0.100503	0.352693	0.105502	0.0122915	0.0528225	0.0362287	0.0839388	0.0272714	0.100046	0.196658
17.2039	0.105736	0.280295	0.0187211		0.0995063	0.350109	0.104087	0.0120986	0.0520828	0.0357472	0.0830031	0.0268151	0.0989396	0.194966
17.2576	0.104706	0.278213	0.0184363		0.0983638	0.347404	0.102945	0.0118837	0.0513757	0.0352816	0.0818707	0.026445	0.0978413	0.193646
17.3049	0.10367	0.276085	0.0181144		0.0973659	0.344863	0.101625	0.0116647	0.0506768	0.0347977	0.0809077	0.0259975	0.0967769	0.192022
17.3503	0.10266	0.273903	0.0178369		0.0964183	0.342218	0.100264	0.0114565	0.0501359	0.0343351	0.0798059	0.0256352	0.0959217	0.190407
17.4068	0.101677	0.272066	0.0175481		0.095249	0.340163	0.0989289	0.0112796	0.0494378	0.03389	0.0789154	0.0252097	0.0948583	0.188835
17.4525	0.100696	0.269954	0.0172746		0.0943158	0.337652	0.0978633	0.0110783	0.0487276	0.0334303	0.0780063	0.0248478	0.093827	0.187211
17.5091	0.0996861	0.267891	0.0169809		0.0931703	0.335163	0.0965706	0.0108759	0.0480738	0.0329786	0.0769196	0.0244426	0.0929977	0.185669
17.5553	0.0987027	0.265773	0.0167188		0.0922475	0.332613	0.0953039	0.0106814	0.0474018	0.0325404	0.0760798	0.0240978	0.0919822	0.184079
17.6008	0.0977415	0.263723	0.0164346		0.0913479	0.330134	0.094264	0.0104862	0.0468881	0.0320416	0.0750304	0.0237048	0.0909642	0.182554
17.6561	0.0967818	0.26166	0.0161912		0.0902664	0.327621	0.092994	0.0103204	0.0462356	0.0316141	0.0741919	0.0233666	0.0901658	0.181042
17.7028	0.0958036	0.259623	0.0159156		0.0893612	0.325176	0.091809	0.0101376	0.045589	0.0311909	0.0731284	0.0229777	0.0891648	0.179502
17.7591	0.0948918	0.257721	0.0156671		0.088283	0.322718	0.0907777	0.00995312	0.0449506	0.0307766	0.0723331	0.0226509	0.0881948	0.178281
17.8051	0.0940087	0.255993	0.0154001		0.0874115	0.320782	0.0895873	0.00977449	0.0443403	0.0303579	0.0713368	0.022276	0.0874154	0.176806
17.8513	0.0930928	0.253949	0.0151709		0.0865457	0.318296	0.0883843	0.00961814	0.0438785	0.0299606	0.0705375	0.0219575	0.0864463	0.175304
17.9055	0.0921846	0.251981	0.014916		0.0855421	0.315914	0.0874134	0.009447	0.0432703	0.0295596	0.0697532	0.0216002	0.0855065	0.17384
17.9521	0.0912794	0.25001	0.0146813		0.0846867	0.313541	0.0862664	0.0092758	0.0426678	0.0291671	0.0687894	0.021288	0.0847507	0.17236
18.0088	0.0903711	0.248097	0.014435		0.083657	0.311242	0.0851567	0.00910875	0.0420548	0.0287781	0.0680244	0.0209448	0.0838252	0.170919
18.055	0.0894776	0.246124	0.0142071		0.0828275	0.30884	0.0842153	0.00894139	0.0414906	0.0283928	0.067057	0.0206429	0.0828975	0.169471
18.1002	0.0886563	0.244444	0.0139783		0.082025	0.306982	0.0830844	0.00880311	0.0410649	0.0280157	0.0663112	0.0203036	0.0819635	0.168009
18.156	0.0878235	0.242683	0.0137622		0.0810455	0.304687	0.0820086	0.00864642	0.0404672	0.0276346	0.065572	0.0200148	0.0812577	0.166902
18.2013	0.0869498	0.2408	0.0135244		0.0802578	0.302401	0.0809326	0.00848748	0.0399041	0.0272728	0.0646774	0.0196805	0.0803737	0.165511
18.2572	0.0860927	0.238929	0.0132976		0.0792969	0.30017	0.0800505	0.00833657	0.039346	0.0269078	0.0639166	0.019361	0.079464	0.164078
18.3037	0.0852679	0.237093	0.0130902		0.0785047	0.29796	0.0789796	0.00818387	0.0389525	0.0264849	0.0630462	0.0190867	0.0787803	0.1627
18.3511	0.0844294	0.235219	0.0128818		0.0777051	0.295672	0.0779308	0.00806025	0.0384101	0.0261432	0.0623427	0.0187748	0.0779238	0.161331
18.4064	0.0835932	0.23341	0.0126792		0.0767846	0.29349	0.0770887	0.00791089	0.0378698	0.0257922	0.0614526	0.0185071	0.0770577	0.159978
18.4518	0.0827919	0.23158	0.0124619		0.076039	0.291263	0.0760773	0.00777135	0.0373448	0.0254377	0.060766	0.0181948	0.0763917	0.158633
18.507	0.0820409	0.230123	0.0122682		0.0751384	0.289493	0.075076	0.0076272	0.0368249	0.0250995	0.0601026	0.0179405	0.0755462	0.15756
18.5529	0.0812576	0.228366	0.0120689		0.0743991	0.28736	0.0742268	0.00751109	0.0364345	0.024775	0.0592736	0.0176395	0.074695	0.156261
18.6104	0.0804641	0.22656	0.0118825		0.0734819	0.285176	0.0732523	0.00737607	0.0359401	0.0244426	0.0586112	0.0173903	0.0740519	0.154919
18.6564	0.0796681	0.224816	0.0116814		0.0727561	0.283051	0.0723172	0.0072419	0.0354414	0.024109	0.057771	0.0171074	0.0732463	0.15364
18.7027	0.0789064	0.22306	0.0114978		0.0720348	0.280896	0.0715072	0.00711046	0.0349257	0.0237979	0.0571427	0.0168601	0.0724171	0.152372
18.7579	0.0781267	0.221317	0.0113145		0.0711817	0.2788	0.0705699	0.00699887	0.0344396	0.0234784	0.0563557	0.0165891	0.0717941	0.15106
18.8034	0.0773843	0.219595	0.0111396		0.0704881	0.27669	0.0696405	0.00687453	0.0340917	0.0231557	0.0557242	0.0163525	0.0710136	0.149812
18.8587	0.0766695	0.218104	0.0109477		0.0696538	0.275031	0.0688595	0.00674782	0.0336183	0.0228478	0.0551046	0.0160808	0.0702242	0.148527
18.9064	0.0759092	0.216374	0.0107792		0.0689398	0.272893	0.0679779	0.00662741	0.0331503	0.0225525	0.0543432	0.0158537	0.0694593	0.147294
18.9524	0.0751839	0.21469	0.0105928		0.0682591	0.270853	0.0670675	0.00650624	0.0326839	0.0222499	0.0537389	0.0155875	0.0688468	0.146047
19.0068	0.0744773	0.213129	0.010433		0.0674642	0.268819	0.0663389	0.00639064	0.0323316	0.0219462	0.0529747	0.0153737	0.0680711	0.145063
19.0539	0.0737499	0.211478	0.010263		0.0667823	0.266809	0.065449	0.00629154	0.0318776	0.0216109	0.0523855	0.0151171	0.0673254	0.143851
19.1082	0.0730306	0.209827	0.0101029		0.0660066	0.264808	0.0645991	0.00617902	0.0314452	0.0213228	0.051668	0.0148988	0.0667508	0.142628
19.1547	0.0723598	0.208404	0.00993229		0.0653482	0.263211	0.0637521	0.00606608	0.0310185	0.0210374	0.0510947	0.0146576	0.0659953	0.141417
19.2023	0.0716747	0.206809	0.00977488		0.0646799	0.261274	0.063045	0.00595464	0.0305881	0.0207559	0.0504938	0.0144441	0.0652718	0.14024
19.2576	0.0709842	0.205215	0.00961944		0.0639136	0.259352	0.0622055	0.00586442	0.0302485	0.0204802	0.0498061	0.0142089	0.0647161	0.139047
19.3028	0.070301	0.203595	0.00947051		0.0632945	0.257355	0.0614128	0.00575773	0.0298393	0.0202073	0.0492504	0.0140084	0.0639968	0.137887
19.3581	0.0696062	0.202018	0.00930785		0.0625446	0.255459	0.0607227	0.00565439	0.0294231	0.0199371	0.0485472	0.0137732	0.0632997	0.136701
19.404	0.0689718	0.200534	0.00916603		0.0619293	0.253519	0.0599262	0.00555135	0.0290146	0.0196722	0.0480048	0.013584	0.0627416	0.135775
19.4508	0.0682914	0.198983	0.00900942		0.0613071	0.25163	0.0591378	0.00545187	0.0286106	0.01941	0.0473389	0.0133575	0.0620346	0.134636
19.5062	0.0676434	0.19742	0.00887673		0.0605788	0.249715	0.0584737	0.00536591	0.028298	0.0191502	0.0468258	0.0131677	0.061355	0.133504
19.5535	0.0670445	0.196091	0.00872533		0.0599631	0.248201	0.0577286	0.00526927	0.0279041	0.0188939	0.0463025	0.0129494	0.0608314	0.132402
19.6073	0.0663738	0.194569	0.00858857		0.0592741	0.246364	0.0569635	0.00517246	0.0275123	0.0186429	0.0456387	0.0127638	0.0601428	0.131263
19.6545	0.0657484	0.193057	0.00844463		0.0586736	0.244501	0.0563316	0.00508031	0.0271391	0.0183945	0.0451424	0.0125566	0.0594835	0.130182
19.7097	0.0650915	0.191534	0.00832136		0.057979	0.242644	0.0555752	0.00500182	0.0267708	0.0181486	0.0445206	0.0123786	0.0588296	0.129067
19.7564	0.064511	0.190151	0.00817733		0.0573983	0.240841	0.0548568	0.00490987	0.0264845	0.0179074	0.0440218	0.0121709	0.0583216	0.128198
19.8021	0.0638833	0.188646	0.00805349		0.0568355	0.238973	0.0542435	0.00482258	0.0261063	0.0176244	0.0434027	0.0120024	0.0576863	0.127136
19.8578	0.063263	0.18719	0.00791513		0.0561574	0.237184	0.0535457	0.00473424	0.0257531	0.017397	0.0429308	0.0118029	0.057038	0.126087
19.9052	0.0626918	0.185946	0.00779319		0.0555854	0.235809	0.0528209	0.00464993	0.0253939	0.0171636	0.0423256	0.0116349	0.0565334	0.125002
19.9504	0.0620983	0.18447	0.00766489		0.055048	0.233972	0.0522427	0.00457632	0.0250414	0.016931	0.0418497	0.0114398	0.0559141	0.123968
20.0061	0.0614947	0.183034	0.00754775		0.0543905	0.232222	0.0515662	0.00449561	0.0246927	0.0167033	0.0413842	0.0112782	0.0552998	0.122914
20.0517	0.0609158	0.181613	0.00741942		0.0538587	0.230478	0.0508897	0.00441221	0.0244229	0.0164864	0.0408174	0.0110949	0.0548094	0.121888
20.1086	0.0603189	0.180198	0.00729322		0.0532006	0.228755	0.0502194	0.00433462	0.0240829	0.0162627	0.0403645	0.0109093	0.0542086	0.120851
20.1538	0.0597532	0.1788	0.00718195		0.0526862	0.227039	0.0496616	0.00425553	0.0237447	0.0160434	0.0398898	0.0107587	0.0536127	0.11984
20.2012	0.0591887	0.177421	0.00707575		0.0521493	0.225363	0.0490021	0.00418933	0.0234226	0.0158364	0.0393466	0.0106036	0.0531497	0.118825
20.255	0.0586784	0.176318	0.00695546		0.05155	0.224011	0.0483737	0.00411329	0.0231791	0.0156239	0.0389075	0.0104292	0.0525707	0.118026
20.3021	0.0581151	0.174961	0.00683684		0.0510283	0.222365	0.0478367	0.00403925	0.0228577	0.0154122	0.038352	0.0102561	0.0519799	0.117023
20.3573	0.0575582	0.173578	0.00673022		0.0504246	0.220647	0.0472071	0.00396586	0.0225313	0.0152048	0.0379235	0.0101089	0.05152	0.116048
20.4046	0.0570019	0.172232	0.00663168		0.0499131	0.219023	0.0465832	0.00390351	0.0222264	0.0150074	0.0373974	0.00996611	0.0509557	0.115043
20.4582	0.0564568	0.170874	0.0065203		0.0493405	0.217343	0.0460604	0.00383385	0.0219165	0.0148038	0.0369921	0.00980374	0.0503959	0.114078
20.5055	0.0559279	0.169556	0.00640982		0.0488395	0.215733	0.0454723	0.00376376	0.0216925	0.0146041	0.0364636	0.00964389	0.0499489	0.113117
20.5509	0.0553938	0.168233	0.00631112		0.048364	0.214103	0.0448699	0.00369689	0.0213921	0.014381	0.0360543	0.0095063	0.0494014	0.112169
20.6074	0.0548978	0.167101	0.00621127		0.0477778	0.212816	0.0443737	0.00362892	0.0210784	0.0141892	0.0356622	0.00936747	0.0488583	0.111226
20.6531	0.0543838	0.165873	0.00611277		0.0473097	0.2112	0.0437893	0.00357446	0.020785	0.0139964	0.035171	0.00921514	0.0483233	0.110474
20.7098	0.0538703	0.164601	0.00600818		0.0467351	0.209632	0.0432104	0.00350913	0.0204931	0.0138123	0.034777	0.00906258	0.0479088	0.109563
20.7559	0.0533493	0.16328	0.00591443		0.0462721	0.208	0.0426438	0.00344466	0.0202906	0.0136289	0.0342879	0.00893304	0.0473704	0.108622
20.8014	0.0528556	0.16202	0.00581524		0.0458214	0.206443	0.0421714	0.00338325	0.020005	0.0134435	0.0339151	0.00878767	0.0468605	0.107725
20.8567	0.0523476	0.160767	0.0057292		0.0452788	0.204893	0.041609	0.00333075	0.0197276	0.0132672	0.033437	0.00866064	0.046437	0.106836
20.9026	0.051858	0.159511	0.0056335		0.0448331	0.203361	0.0411537	0.00327097	0.0194459	0.0130909	0.033061	0.00852104	0.0459268	0.105916
20.9598	0.051395	0.158464	0.00554544		0.0442826	0.202173	0.0406193	0.00321137	0.0191827	0.0129163	0.0326933	0.0083982	0.0454318	0.105041
21.0059	0.0509093	0.157202	0.00545167		0.0438448	0.200616	0.0400867	0.00315382	0.0189849	0.0127408	0.0322455	0.00826016	0.0450205	0.10414
21.0521	0.0504489	0.156077	0.00536674		0.04341	0.199144	0.0395484	0.00309554	0.0187219	0.0125732	0.0318878	0.00814266	0.0445256	0.10344
21.1056	0.0499619	0.15485	0.00527951		0.0429133	0.197614	0.0391143	0.00304819	0.0184627	0.0124063	0.0314328	0.00800668	0.044038	0.102583
21.1531	0.0495026	0.153658	0.0051993		0.042476	0.196161	0.0386158	0.00299218	0.0181919	0.0122375	0.0310836	0.00789688	0.0436603	0.101711
21.2084	0.0490275	0.152482	0.00511068		0.041973	0.194717	0.0381043	0.00293888	0.0180101	0.012077	0.0306593	0.00776509	0.0431696	0.100861
21.2543	0.0485681	0.151273	0.00503129		0.0415594	0.19322	0.037681	0.00288491	0.0177584	0.0119166	0.0302979	0.00765464	0.0427049	0.100004
21.3009	0.0481464	0.150254	0.00495034		0.0411443	0.192062	0.0371853	0.00284029	0.017512	0.0117576	0.0299593	0.0075293	0.042319	0.099155
21.3564	0.0476802	0.149106	0.00487378		0.0406549	0.190651	0.0366944	0.00278978	0.0172655	0.0115978	0.0295438	0.00742088	0.041854	0.0983295
21.4016	0.0472395	0.14792	0.00479073		0.0402605	0.189179	0.0362992	0.00273868	0.0170785	0.0114212	0.0292235	0.00729878	0.0414029	0.0974928
21.4576	0.0467892	0.146789	0.00471755		0.0397779	0.187787	0.0358181	0.00268991	0.0168457	0.0112646	0.0288061	0.00719577	0.0410281	0.0966796
21.5044	0.0463595	0.145702	0.00463975		0.0393783	0.186345	0.0353322	0.00264733	0.0166158	0.0111148	0.0284827	0.00707492	0.0405771	0.0960272
21.5503	0.0459339	0.14457	0.0045702		0.0389903	0.184965	0.0349452	0.00260064	0.0163851	0.0109707	0.028173	0.00697744	0.0401328	0.095199
21.607	0.0454846	0.143442	0.00449048		0.0385162	0.183567	0.0344934	0.0025524	0.0161581	0.0108219	0.0277849	0.00685924	0.0396921	0.0944004
21.6524	0.0450622	0.1423	0.00442285		0.0381419	0.18214	0.0340376	0.00250751	0.0159344	0.0106757	0.0274736	0.00676382	0.0393413	0.0936064
21.7077	0.0446602	0.141368	0.0043477		0.0376901	0.181077	0.0335915	0.00246176	0.0157558	0.0105338	0.0270872	0.00665274	0.0389179	0.0928336
21.7536	0.044249	0.14027	0.00428001		0.0373192	0.179734	0.0332133	0.00241763	0.0155438	0.0103966	0.0267927	0.00655626	0.0384811	0.0920355
21.8003	0.0438332	0.139175	0.00421112		0.0369448	0.178365	0.0327773	0.00237947	0.0153265	0.010254	0.026415	0.00644981	0.0381425	0.0912771
21.8571	0.0434314	0.138162	0.00414645		0.0364951	0.177037	0.0323577	0.00233664	0.0151139	0.0101177	0.026118	0.00635843	0.0377313	0.0906482
21.9033	0.0430247	0.137072	0.00407634		0.0361331	0.175678	0.0319989	0.00229419	0.0149481	0.00998657	0.0257597	0.00625453	0.0373075	0.0898861
21.9586	0.0426256	0.136026	0.00400665		0.0357052	0.174385	0.0315775	0.00225291	0.0147397	0.00985109	0.0254738	0.00615011	0.0369787	0.0891418
22.004	0.0422321	0.134989	0.00394739		0.0353575	0.173102	0.0311539	0.00221782	0.0145389	0.009718	0.0251911	0.0060613	0.0365738	0.088406
22.0593	0.0418486	0.134042	0.00388697		0.034939	0.172003	0.0308121	0.00217728	0.0143405	0.00958886	0.0248317	0.00597659	0.0361722	0.0876452
22.106	0.0414673	0.133022	0.00382056		0.0345888	0.170741	0.0304169	0.00213859	0.0141413	0.00944187	0.0245558	0.00587631	0.0358526	0.08692
22.1518	0.0410831	0.131999	0.00376158		0.0342494	0.169486	0.0300096	0.00209928	0.0139905	0.00933416	0.0242207	0.00579329	0.0354667	0.0861816
22.2074	0.0406917	0.130956	0.00369866		0.033841	0.168179	0.0296833	0.00206198	0.013796	0.00919119	0.0239351	0.00569906	0.0350686	0.0854618
22.2547	0.0403206	0.129948	0.00364399		0.0334975	0.166941	0.0292911	0.00202998	0.0135982	0.00906912	0.0236677	0.00561668	0.03476	0.0847346
22.3085	0.039944	0.128985	0.00358285		0.033112	0.165659	0.0289042	0.00199268	0.0134153	0.00894574	0.0233394	0.0055264	0.0343853	0.0841597
22.3552	0.0395801	0.127996	0.00352186		0.0327798	0.164434	0.0285926	0.00195716	0.0132277	0.00882865	0.0230864	0.00543428	0.0339991	0.0834613
22.4011	0.0392299	0.127137	0.00346791		0.0324572	0.16345	0.0282138	0.00192223	0.0130442	0.00871049	0.0227566	0.00535706	0.0336333	0.0827543
22.4575	0.0388641	0.126138	0.00340862		0.0320644	0.162209	0.0278337	0.00188712	0.0129011	0.00859485	0.0225012	0.00526824	0.0333305	0.082051
22.5034	0.0385056	0.125165	0.00335848		0.0317494	0.161	0.0275343	0.00185773	0.0127213	0.0084802	0.022189	0.00519273	0.0329645	0.0813675
22.5506	0.0381444	0.124176	0.00330223		0.0314272	0.159779	0.0271703	0.00182443	0.0125479	0.00836666	0.0219499	0.00510842	0.032608	0.0806627
22.6044	0.0377915	0.123205	0.0032511		0.0310654	0.158566	0.026814	0.00179072	0.0123767	0.00825554	0.021704	0.005036	0.0323215	0.0799856
22.6512	0.0374428	0.122254	0.00319563		0.0307534	0.157389	0.026517	0.001759	0.012245	0.00814323	0.0213988	0.00495151	0.0319588	0.0793123
22.7067	0.0370867	0.121281	0.00314934		0.0303878	0.156163	0.0261633	0.00173093	0.0120746	0.00803665	0.0211661	0.00488296	0.0316144	0.0786473
22.7536	0.0367826	0.120547	0.00309586		0.0300823	0.155252	0.0258201	0.0017001	0.0119068	0.00792908	0.0208677	0.0048018	0.0313361	0.0781307
22.8095	0.0364347	0.119611	0.00304794		0.0297216	0.1541	0.0254879	0.00166888	0.011736	0.00782381	0.0206331	0.00473347	0.0309841	0.0774587
22.855	0.036096	0.118679	0.00299589		0.0294315	0.152926	0.0252062	0.00163918	0.0115782	0.00770376	0.02035	0.00465409	0.0306507	0.0768201
22.9005	0.0357717	0.117756	0.00294996		0.0291446	0.151789	0.0248677	0.00160948	0.011459	0.00760034	0.0201242	0.00458832	0.0303747	0.0761602
22.957	0.0354315	0.116831	0.00290255		0.0287916	0.150621	0.0245947	0.00158429	0.0113006	0.00749587	0.0198406	0.00451376	0.0300412	0.0755316
23.0027	0.0351082	0.115941	0.00285827		0.0285093	0.149514	0.0242812	0.00155607	0.0111344	0.0073962	0.0196169	0.00444985	0.0297164	0.074908
23.0505	0.0347835	0.115047	0.00280974		0.0282168	0.148416	0.0239596	0.00152746	0.0109792	0.0073006	0.019399	0.00437698	0.0293961	0.0742632
23.1058	0.0344744	0.11425	0.0027664		0.0278825	0.147468	0.0236391	0.00150027	0.0108296	0.00720263	0.0191342	0.00431389	0.0291247	0.0736497
23.151	0.0341776	0.113424	0.00272141		0.0276127	0.146389	0.0233818	0.00147652	0.0107169	0.00710432	0.0189086	0.00424294	0.0288108	0.073133
23.2067	0.0338563	0.112534	0.00268017		0.0272831	0.145267	0.0230731	0.00145056	0.0105681	0.00701267	0.0186974	0.00418302	0.0285002	0.0725274
23.2523	0.0335458	0.111674	0.00263393		0.0270164	0.144194	0.0227704	0.00142409	0.0104211	0.00691852	0.018438	0.00411262	0.0282364	0.0719265
23.3093	0.0332373	0.110812	0.00259375		0.0266856	0.143127	0.0225221	0.00139856	0.0102763	0.00682342	0.0182381	0.00405454	0.0279326	0.0713147
23.3554	0.0329259	0.109947	0.00254977		0.0264218	0.142043	0.0222165	0.00137265	0.0101674	0.0067327	0.0179776	0.00398848	0.0276201	0.0707188
23.4016	0.0326278	0.109083	0.00251282		0.0261598	0.140964	0.0219249	0.00135171	0.0100291	0.00664567	0.0177758	0.00393194	0.0273772	0.0701178
23.4553	0.032346	0.108361	0.00247029		0.0258596	0.140137	0.0216891	0.00132715	0.0098898	0.00655649	0.0175292	0.00386747	0.0270812	0.0695226
23.5026	0.032048	0.107514	0.00243175		0.0255971	0.139072	0.0214025	0.00130327	0.00975306	0.006467	0.0173403	0.00381099	0.0267893	0.0689438
23.5578	0.0317429	0.10667	0.00239097		0.025294	0.138017	0.021122	0.00127985	0.00960969	0.00636821	0.0170906	0.00374902	0.0265419	0.0683572
23.6045	0.0314736	0.105903	0.00235597		0.0250406	0.136993	0.0208842	0.00125952	0.00951391	0.00628331	0.0169049	0.00369609	0.0262559	0.0679049
23.6502	0.0311794	0.105071	0.00231584		0.0247953	0.13595	0.0206101	0.00123714	0.00938091	0.0062113	0.0166722	0.00363425	0.0259728	0.0673295
23.7069	0.0308901	0.104253	0.00227672		0.0244941	0.134939	0.0203462	0.0012144	0.00924929	0.00611627	0.0164854	0.00357511	0.0257324	0.0667489
23.753	0.0306041	0.10343	0.0022416		0.0242515	0.133899	0.0200737	0.00119282	0.00912093	0.00603501	0.0163	0.00352343	0.0254556	0.066189
23.8072	0.0303389	0.102734	0.00220741		0.0239706	0.13309	0.0198556	0.00117084	0.00899405	0.0059546	0.0160764	0.00347433	0.0251708	0.0656322
23.8538	0.0300641	0.101942	0.0021715		0.0237306	0.132094	0.0195893	0.00115274	0.00889581	0.00587499	0.015898	0.00341666	0.0248986	0.0650904
23.9006	0.0297885	0.101145	0.00213813		0.0234927	0.131102	0.0193349	0.00113218	0.00877504	0.00579692	0.015674	0.00336761	0.0246796	0.0645308
23.9568	0.0295281	0.10042	0.0021023		0.0232093	0.130139	0.0191259	0.00111198	0.00865567	0.00571964	0.0154972	0.0033127	0.0244136	0.0640955
24	0.0292827	0.0997182	0.00207121		0.0229948	0.129291	0.0188923	0.00109378	0.00855421	0.00564924	0.0153277	0.00326585	0.0241848	0.0635735

## Sheet: AUC0(Sub)(CPlasma)
AUC0(Sub)(CPlasma) integrated from 0.00 (h) to 24.00 (h)																	AUC (mg/L.h)
Index	Trial	AUC (mg/L.h)	TMax (h)	CMax (mg/L)	Dose (mg)	CL (Dose/AUC) (L/h)											Trial Group	95th percentile	5th percentile	median	up-median	median-lo
1	1	14.7002	1.85078	2.37722	50	3.40132											1	23.0851	10.1814	14.416	8.66913	4.23457
2	1	24.4054	2.10974	2.9661	50	2.04872
3	1	21.4715	2.25409	3.57282	50	2.32867											Trial Range	Upper Percentile	Lower Percentile	Median
4	1	10.0592	1.7017	2.37806	50	4.97057											0	23.0851	10.1814	14.416
5	1	14.1318	1.81247	2.7062	50	3.53811											2	23.0851	10.1814	14.416
6	1	10.3308	1.85864	1.98783	50	4.83989
7	1	18.3891	1.70251	3.37755	50	2.71901
8	1	13.1073	1.5066	2.87822	50	3.81467											CMax (mg/L)
9	1	12.6519	2.25273	1.88459	50	3.95198											Trial Group	95th percentile	5th percentile	median	up-median	median-lo
10	1	15.5978	2.45266	1.93056	50	3.20558											1	3.48495	1.90528	2.54213	0.942817	0.636851
																	Trial Range	Upper Percentile	Lower Percentile	Median
	Statistics																0	3.48495	1.90528	2.54213
		AUC (mg/L.h)	TMax (h)	CMax (mg/L)	Dose (mg)	CL (Dose/AUC) (L/h)											2	3.48495	1.90528	2.54213
	Mean	15.4845	1.95019	2.60592	50	3.48185
	Median	14.416	1.85471	2.54213	50	3.46971
	Geometric Mean	14.8966	1.92945	2.54499	50	3.35648											TMax (h)
	90% confidence interval around the geometric mean(lower limit)	12.59	1.76469	2.22784	50	2.83677											Trial Group	95th percentile	5th percentile	median	up-median	median-lo
	90% confidence interval around the geometric mean(upper limit)	17.6257	2.1096	2.90729	50	3.9714											1	2.3633	1.5944	1.85471	0.50859	0.260314
	5th centile	10.1814	1.5944	1.90528	50	2.1747
	95th centile	23.0851	2.3633	3.48495	50	4.91176											Trial Range	Upper Percentile	Lower Percentile	Median
	Skewness	0.838299	0.32635	0.318703	n/a	0.153206											0	2.3633	1.5944	1.85471
	cv	0.301369	0.154675	0.229067	0	0.278189											2	2.3633	1.5944	1.85471
	Min Val	10.0592	1.5066	1.88459	50	2.04872
	Max Val	24.4054	2.45266	3.57282	50	4.97057
	Fold	2.42618	1.62794	1.8958	1	2.42618											CL (Dose/AUC)(L(h)
	Std Dev	4.66654	0.301645	0.596929	0	0.968614											Trial Group	95th percentile	5th percentile	median	up-median	median-lo
																	1	4.91176	2.1747	3.46971	1.44205	1.29501
																	Trial Range	Upper Percentile	Lower Percentile	Median
																	0	4.91176	2.1747	3.46971
																	2	4.91176	2.1747	3.46971
																	Trial Statistics: MEAN
																	Trial	CMax (mg/L)	AUC (mg/L.h)	TMax (h)	CL (Dose/AUC)(L/h)
																	1	2.60592	15.4845	1.95019	3.48185
																	Population	2.60592	15.4845	1.95019	3.48185
																	Observed
																	Trial Statistics: MEDIAN
																	Trial	CMax (mg/L)	AUC (mg/L.h)	TMax (h)	CL (Dose/AUC)(L/h)
																	1	2.54213	14.416	1.85471	3.46971
																	Population	2.54213	14.416	1.85471	3.46971
																	Observed
																	Trial Statistics: GEOMETRIC MEAN
																	Trial	CMax (mg/L)	AUC (mg/L.h)	TMax (h)	CL (Dose/AUC)(L/h)
																	1	2.54499	14.8966	1.92945	3.35648
																	Population	2.54499	14.8966	1.92945	3.35648
																	Observed

## Sheet: Workspace
<Chunk><?xml version="1.0"?> <Workspace xmlns:xsd="http://www.w3.org/2001/XMLSchema" xmlns:xsi="http://www.w3.org/2001/XMLSchema-instance" version="17" build="90"> <Species>Human</Species> <SimulationData> <SubstrateAnalyticalError> <PlasmaConc> <bSelected>false</bSelected> <ErrorModel>0</ErrorModel> <Eps_Add>0</Eps_Add> <Eps_prop>0</Eps_prop> </PlasmaConc> <BloodConc> <bSelected>false</bSelected…	593855200
<Chunk> <boolean>false</boolean> <boolean>false</boolean> <boolean>false</boolean> <boolean>false</boolean> </KidneyEnzymes> <MPML_DermA_SC_Layers>false</MPML_DermA_SC_Layers> <MPML_DermA_SC_Layers_Sum>false</MPML_DermA_SC_Layers_Sum> <MPML_DermA_VE_Profiles>false</MPML_DermA_VE_Profiles> <MPML_DermA_Formulation>false</MPML_DermA_Formulation> <MPML_DermA_Dermis_Profiles>false</MPML_DermA_Dermis_P…
<Chunk> <SystemEnabled>false</SystemEnabled> <System>0</System> <CLpd>0.1</CLpd> <KiEnabled>false</KiEnabled> <Ki>1000000</Ki> <Ki_VariationType>0</Ki_VariationType> <Ki_VariationValue>0</Ki_VariationValue> <KiFuinc>1</KiFuinc> <KiFuinc_VariationType>0</KiFuinc_VariationType> <KiFuinc_VariationValue>0</KiFuinc_VariationValue> <ExtraParams /> </Transporter> <Transporter> <Enabled>false</Enabled> <…
<Chunk> <Km_Screen>1000000</Km_Screen> <Km_VariationType>0</Km_VariationType> <Km_VariationValue>0</Km_VariationValue> <CLint_fuinc>1</CLint_fuinc> <CLint_fuinc_VariationType>0</CLint_fuinc_VariationType> <CLint_fuinc_VariationValue>0</CLint_fuinc_VariationValue> <ScalingFactor>1</ScalingFactor> <ScalingFactor_VariationType>0</ScalingFactor_VariationType> <ScalingFactor_VariationValue>0</ScalingF…
<Chunk>c_VariationValue>0</CLint_fuinc_VariationValue> <ScalingFactor>1</ScalingFactor> <ScalingFactor_VariationType>0</ScalingFactor_VariationType> <ScalingFactor_VariationValue>0</ScalingFactor_VariationValue> <A_Screen>1</A_Screen> <SystemEnabled>false</SystemEnabled> <System>0</System> <CLpd>0.1</CLpd> <KiEnabled>false</KiEnabled> <Ki>1000000</Ki> <Ki_VariationType>0</Ki_VariationType> <Ki_Va…
<Chunk>> <Alpha>1</Alpha> <Beta>1</Beta> <RouteType>CYP</RouteType> <LiverScalar>1</LiverScalar> <GutScalar>1</GutScalar> <KidneyScalar>1</KidneyScalar> <LiverScalar_Est>1</LiverScalar_Est> <GutScalar_Est>1</GutScalar_Est> <KidneyScalar_Est>1</KidneyScalar_Est> <PlasmaHL>0</PlasmaHL> <Genotype>0</Genotype> <CLint_VariationType>0</CLint_VariationType> <CLint_VariationValue>0</CLint_VariationValue>…
<Chunk>i>1</Ki> <Fumic>1</Fumic> <KappSwitch>false</KappSwitch> <Kapp>1000000</Kapp> <Kinact>0</Kinact> <Kapp_fumic>1</Kapp_fumic> <IndSlopeSwitch>false</IndSlopeSwitch> <IndSlope>0</IndSlope> <IndSlopeCV>30</IndSlopeCV> <IndMax>1</IndMax> <IndMaxCV>30</IndMaxCV> <IndC50Switch>false</IndC50Switch> <IndC50>1000000</IndC50> <IndC50CV>30</IndC50CV> <IndC50_fuinc>1</IndC50_fuinc> <Y>1</Y> <Ki_Variati…
<Chunk>off>0</Koff> <KoffPadlockOpen>true</KoffPadlockOpen> <Kint>0</Kint> <KintPadlockOpen>true</KintPadlockOpen> <Kss>1000000</Kss> <KssPadlockOpen>true</KssPadlockOpen> <Km>1000000</Km> <KmPadlockOpen>true</KmPadlockOpen> <Vmax>0</Vmax> <VmaxPadlockOpen>true</VmaxPadlockOpen> <Target>15</Target> </TMDDDar> </ArrayOfTMDDDar> <ArrayOfTMDDDar> <TMDDDar> <DarNumber>0</DarNumber> <Name>DAR0</Name> …
<Chunk> <AdultFractions> <float>1</float> <float>1</float> <float>1</float> <float>1</float> <float>1</float> <float>1</float> <float>1</float> <float>1</float> <float>1</float> <float>1</float> </AdultFractions> <ProfileCount>2</ProfileCount> <Type>0</Type> </OntogenyData> <OntogenyData> <Ages> <float>0</float> <float>2.78</float> <float>5.56</float> <float>8.33</float> <float>11.1</float> <floa…
<Chunk>0</idDissProfB_WeibullFmax1> <idDissProfB_WeibullFmax2>100</idDissProfB_WeibullFmax2> <idDissProfA_WeibullAlpha1>2</idDissProfA_WeibullAlpha1> <idDissProfA_WeibullAlpha2>2</idDissProfA_WeibullAlpha2> <idDissProfB_WeibullAlpha1>2</idDissProfB_WeibullAlpha1> <idDissProfB_WeibullAlpha2>2</idDissProfB_WeibullAlpha2> <idDissProfA_WeibullBeta1>1</idDissProfA_WeibullBeta1> <idDissProfA_WeibullBet…
<Chunk>ioPSlFreeCheckLung> <BioPSlFreeCheckMuscle>false</BioPSlFreeCheckMuscle> <BioPSlFreeCheckSkin>false</BioPSlFreeCheckSkin> <BioPSlFreeCheckSpleen>false</BioPSlFreeCheckSpleen> <BioPSlFreeCheckPlasma>false</BioPSlFreeCheckPlasma> <BioPSlFreeCheckRBC>false</BioPSlFreeCheckRBC> <BioPSlFreeCheckAdditionalOrgan>true</BioPSlFreeCheckAdditionalOrgan> <BioPSlFreeCheckBrainCSF>false</BioPSlFreeCheck…
<Chunk>PvowType> <LogPvowHanschA>1.115</LogPvowHanschA> <LogPvowHanschB>-1.35</LogPvowHanschB> <UseViscosityModel>false</UseViscosityModel> <ViscosityModelExponent>0.987</ViscosityModelExponent> <AbsorptionRateScalarGlobalSwitch>false</AbsorptionRateScalarGlobalSwitch> <AbsorptionRateScalarGlobal>1</AbsorptionRateScalarGlobal> <AbsorptionRateScalarDuodenum>1</AbsorptionRateScalarDuodenum> <Absorp…
<Chunk>MaxRateValue_RIS> <idKm_LM>0</idKm_LM> <idKm_Hep>0</idKm_Hep> <idKm_SI>0</idKm_SI> <idKm_Ren>0</idKm_Ren> <idKm_RIS>0</idKm_RIS> <idMISClint>0</idMISClint> <idMISFuinc>0</idMISFuinc> <LiverCLintValue_S9>0</LiverCLintValue_S9> <LiverFUinc_S9>0</LiverFUinc_S9> <LiverMetaboliteContribution_S9>0</LiverMetaboliteContribution_S9> <LiverSaturableKineticsSwitch_S9>false</LiverSaturableKineticsSwit…
<Chunk>KmVmaxSwitch> <ISEFT>1</ISEFT> <ISEF_T_VariationType>0</ISEF_T_VariationType> <ISEF_T_VariationValue>0</ISEF_T_VariationValue> <ISEFT_RAFREFSwitch>false</ISEFT_RAFREFSwitch> <CL_Screen>0</CL_Screen> <CL_VariationType>0</CL_VariationType> <CL_VariationValue>0</CL_VariationValue> <Jmax_Screen>0</Jmax_Screen> <Jmax_VariationType>0</Jmax_VariationType> <Jmax_VariationValue>0</Jmax_VariationVal…
<Chunk> <Ki_VariationType>0</Ki_VariationType> <Ki_VariationValue>0</Ki_VariationValue> <KiFuinc>1</KiFuinc> <KiFuinc_VariationType>0</KiFuinc_VariationType> <KiFuinc_VariationValue>0</KiFuinc_VariationValue> <ExtraParams /> </Transporter> <Transporter> <Enabled>false</Enabled> <Organ>6</Organ> <TransporterID>SLCO1B3</TransporterID> <Location>Sinusoidal</Location> <Function>Uptake</Function> <ClK…
<Chunk> <CLint_fuinc_VariationType>0</CLint_fuinc_VariationType> <CLint_fuinc_VariationValue>0</CLint_fuinc_VariationValue> <ScalingFactor>1</ScalingFactor> <ScalingFactor_VariationType>0</ScalingFactor_VariationType> <ScalingFactor_VariationValue>0</ScalingFactor_VariationValue> <A_Screen>1</A_Screen> <SystemEnabled>false</SystemEnabled> <System>0</System> <CLpd>0.1</CLpd> <KiEnabled>false</KiEn…
<Chunk>calingFactor_VariationType>0</ScalingFactor_VariationType> <ScalingFactor_VariationValue>0</ScalingFactor_VariationValue> <A_Screen>1</A_Screen> <SystemEnabled>false</SystemEnabled> <System>0</System> <CLpd>0.1</CLpd> <KiEnabled>false</KiEnabled> <Ki>1000000</Ki> <Ki_VariationType>0</Ki_VariationType> <Ki_VariationValue>0</Ki_VariationValue> <KiFuinc>1</KiFuinc> <KiFuinc_VariationType>0</K…
<Chunk> <Kinact>0</Kinact> <Kapp_fumic>1</Kapp_fumic> <IndSlopeSwitch>false</IndSlopeSwitch> <IndSlope>0</IndSlope> <IndSlopeCV>30</IndSlopeCV> <IndMax>1</IndMax> <IndMaxCV>30</IndMaxCV> <IndC50Switch>false</IndC50Switch> <IndC50>1000000</IndC50> <IndC50CV>30</IndC50CV> <IndC50_fuinc>1</IndC50_fuinc> <Y>1</Y> <Ki_VariationType>0</Ki_VariationType> <Ki_VariationValue>0</Ki_VariationValue> <Fumic_V…
<Chunk>DLparmMedian> <idPDLparmDispersion>0</idPDLparmDispersion> <idPDKdeactDistrType>0</idPDKdeactDistrType> <idPDKdeactMedian>1</idPDKdeactMedian> <idPDKdeactDispersion>0</idPDKdeactDispersion> <idPDReciprocalKdeactDistrType>0</idPDReciprocalKdeactDistrType> <idPDReciprocalKdeactMedian>1</idPDReciprocalKdeactMedian> <idPDReciprocalKdeactDispersion>0</idPDReciprocalKdeactDispersion> <idPDEpsilo…
<Chunk>F3> <idIntrinsicSolubility>0.05</idIntrinsicSolubility> <idGivenpHSolubility>0.05</idGivenpHSolubility> <idAtGivenpH>7.4</idAtGivenpH> <idParticleDensity>1.2</idParticleDensity> <idDiffusionCoeffSwitch>false</idDiffusionCoeffSwitch> <idDiffusionCoeff>3.7586484</idDiffusionCoeff> <idIon>3.7586484</idIon> <idDiffusionLayerThickness>30</idDiffusionLayerThickness> <ParticleDispersionSwitch>0</…
<Chunk>BFedRelease17>1</idDissProfBFedRelease17> <idDissProfBFedRelease18>1</idDissProfBFedRelease18> <idDissProfBFedRelease19>1</idDissProfBFedRelease19> <idDissProfBFedRelease20>1</idDissProfBFedRelease20> <idDissProfAFastedRelease1>0</idDissProfAFastedRelease1> <idDissProfAFastedRelease2>100</idDissProfAFastedRelease2> <idDissProfAFastedRelease3>1</idDissProfAFastedRelease3> <idDissProfAFasted…
<Chunk>dBioCLCalcDogClearance> <idBioCLCalcDogBodyweight>10</idBioCLCalcDogBodyweight> <idBioCLCalcDogMLP>0</idBioCLCalcDogMLP> <idBioCLCalcDogBrainWeight>80</idBioCLCalcDogBrainWeight> <idBioCLCalcMouseName>Mouse</idBioCLCalcMouseName> <idBioCLCalcMouseEnabled>false</idBioCLCalcMouseEnabled> <idBioCLCalcMouseClearance>0</idBioCLCalcMouseClearance> <idBioCLCalcMouseBodyweight>0.025</idBioCLCalcMo…
<Chunk>FetoPlacenta> <idFuTissuePancreas>1</idFuTissuePancreas> <idFuTissueCVAdipose>30</idFuTissueCVAdipose> <idFuTissueCVBone>30</idFuTissueCVBone> <idFuTissueCVBrain>30</idFuTissueCVBrain> <idFuTissueCVGut>30</idFuTissueCVGut> <idFuTissueCVHeart>30</idFuTissueCVHeart> <idFuTissueCVKidney>30</idFuTissueCVKidney> <idFuTissueCVLiver>30</idFuTissueCVLiver> <idFuTissueCVLung>30</idFuTissueCVLung> <…
<Chunk>3</MPMLA_FormulationType> <MPMLA_FormSolDiffCoeffLock>false</MPMLA_FormSolDiffCoeffLock> <MPMLA_ConsiderEvaporation>false</MPMLA_ConsiderEvaporation> <MPMLA_SkinTemp>32</MPMLA_SkinTemp> <MPMLA_VapourPressure>43</MPMLA_VapourPressure> <MPMLA_VapourPressureCV>30</MPMLA_VapourPressureCV> <MPMLA_VehicleMW>18</MPMLA_VehicleMW> <MPMLA_AirVelocity>0.5</MPMLA_AirVelocity> <MPMLA_AirVelocityCV>30</…
<Chunk>d> <ADC_AddOrgan_DAR3Locked>false</ADC_AddOrgan_DAR3Locked> <ADC_AddOrgan_DAR4Locked>false</ADC_AddOrgan_DAR4Locked> <ADC_AddOrgan_DAR5Locked>false</ADC_AddOrgan_DAR5Locked> <ADC_AddOrgan_DAR6Locked>false</ADC_AddOrgan_DAR6Locked> <ADC_AddOrgan_DAR7Locked>false</ADC_AddOrgan_DAR7Locked> <ADC_AddOrgan_DAR8Locked>false</ADC_AddOrgan_DAR8Locked> <ADC_AddOrgan_DAR9Locked>false</ADC_AddOrgan_DA…
<Chunk>TransporterID> <Location>Basolateral</Location> <Function>Efflux</Function> <ClKmVmaxSwitch>false</ClKmVmaxSwitch> <ISEFT>1</ISEFT> <ISEF_T_VariationType>0</ISEF_T_VariationType> <ISEF_T_VariationValue>0</ISEF_T_VariationValue> <ISEFT_RAFREFSwitch>false</ISEFT_RAFREFSwitch> <CL_Screen>0</CL_Screen> <CL_VariationType>0</CL_VariationType> <CL_VariationValue>0</CL_VariationValue> <Jmax_Screen…
<Chunk>riationValue>0</KiFuinc_VariationValue> </Transporter> <Transporter> <Enabled>false</Enabled> <Organ>6</Organ> <TransporterID>ABCB1</TransporterID> <Location>Canalicular</Location> <Function>Efflux</Function> <ClKmVmaxSwitch>false</ClKmVmaxSwitch> <ISEFT>1</ISEFT> <ISEF_T_VariationType>0</ISEF_T_VariationType> <ISEF_T_VariationValue>0</ISEF_T_VariationValue> <ISEFT_RAFREFSwitch>false</ISEF…
<Chunk><ISEFT>1</ISEFT> <ISEF_T_VariationType>0</ISEF_T_VariationType> <ISEF_T_VariationValue>0</ISEF_T_VariationValue> <ISEFT_RAFREFSwitch>false</ISEFT_RAFREFSwitch> <CL_Screen>0</CL_Screen> <CL_VariationType>0</CL_VariationType> <CL_VariationValue>0</CL_VariationValue> <Jmax_Screen>0</Jmax_Screen> <Jmax_VariationType>0</Jmax_VariationType> <Jmax_VariationValue>0</Jmax_VariationValue> <Km_Screen…
<Chunk>_VariationType>0</Kapp_VariationType> <Kapp_VariationValue>0</Kapp_VariationValue> <Kapp_fumic_VariationType>0</Kapp_fumic_VariationType> <Kapp_fumic_VariationValue>0</Kapp_fumic_VariationValue> <Kinact_VariationType>0</Kinact_VariationType> <Kinact_VariationValue>0</Kinact_VariationValue> </InteractionRoute> <InteractionRoute> <Enzyme>1</Enzyme> <KiSwitch>false</KiSwitch> <Ki>1000000</Ki>…
<Chunk>Y> <Ki_VariationType>0</Ki_VariationType> <Ki_VariationValue>0</Ki_VariationValue> <Fumic_VariationType>0</Fumic_VariationType> <Fumic_VariationValue>0</Fumic_VariationValue> <IndC50_fuinc_VariationType>0</IndC50_fuinc_VariationType> <IndC50_fuinc_VariationValue>0</IndC50_fuinc_VariationValue> <Kapp_VariationType>0</Kapp_VariationType> <Kapp_VariationValue>0</Kapp_VariationValue> <Kapp_fum…
<Chunk>PAValue> <idInterceptPAValue>-0.3036</idInterceptPAValue> <idUserQGut>10</idUserQGut> <idQGutCV>30</idQGutCV> <idfuGut>1</idfuGut> <idPredictedQGut>16.992094</idPredictedQGut> <idQGutPredictedOld>16.992094</idQGutPredictedOld> <idCaco2RefCompound>2</idCaco2RefCompound> <idCaco2RefValue>21.15</idCaco2RefValue> <idCaco2UserValueSwitch>false</idCaco2UserValueSwitch> <idApical1RefCompound>2</i…
<Chunk>/idContModReleaseGridTime6> <idContModReleaseGridTime7>0</idContModReleaseGridTime7> <idContModReleaseGridTime8>0</idContModReleaseGridTime8> <idContModReleaseGridTime9>0</idContModReleaseGridTime9> <idContModReleaseGridTime10>0</idContModReleaseGridTime10> <idContModReleaseGridTime11>0</idContModReleaseGridTime11> <idContModReleaseGridTime12>0</idContModReleaseGridTime12> <idContModReleas…
<Chunk>en> <idfuIWPlasma>0.1</idfuIWPlasma> <idfuIWRBC>0.1</idfuIWRBC> <idfuIWAddOrgan>0.1</idfuIWAddOrgan> <idfuIWFetoPlacenta>0.1</idfuIWFetoPlacenta> <idfuIWPancreas>0.1</idfuIWPancreas> <idfuIWAdiposePredicted>0.1</idfuIWAdiposePredicted> <idfuIWBonePredicted>0.1</idfuIWBonePredicted> <idfuIWBrainPredicted>0.1</idfuIWBrainPredicted> <idfuIWGutPredicted>0.1</idfuIWGutPredicted> <idfuIWHeartPre…
<Chunk>oPSsBoundAdditionalOrgan> <BioPSsBoundBrainCSF>0</BioPSsBoundBrainCSF> <BioPSsBoundFetoPlacenta>0.001</BioPSsBoundFetoPlacenta> <BioPSsBoundPancreas>0.001</BioPSsBoundPancreas> <BioPSsBoundCVAdipose>30</BioPSsBoundCVAdipose> <BioPSsBoundCVBone>30</BioPSsBoundCVBone> <BioPSsBoundCVBrain>30</BioPSsBoundCVBrain> <BioPSsBoundCVGut>30</BioPSsBoundCVGut> <BioPSsBoundCVHeart>30</BioPSsBoundCVHear…
<Chunk>calTransDuodenum> <GutWallApicalTransJejunum1>6.207963</GutWallApicalTransJejunum1> <GutWallApicalTransJejunum2>6.207963</GutWallApicalTransJejunum2> <GutWallApicalTransIleum1>6.207963</GutWallApicalTransIleum1> <GutWallApicalTransIleum2>6.207963</GutWallApicalTransIleum2> <GutWallApicalTransIleum3>6.207963</GutWallApicalTransIleum3> <GutWallApicalTransIleum4>6.207963</GutWallApicalTransIl…
<Chunk>bution_SigmaV_BrainLock> <ADC_Distribution_SigmaV_MuscleLock>false</ADC_Distribution_SigmaV_MuscleLock> <ADC_Distribution_SigmaV_SkinLock>false</ADC_Distribution_SigmaV_SkinLock> <ADC_Distribution_SigmaV_AdiposeLock>false</ADC_Distribution_SigmaV_AdiposeLock> <ADC_Distribution_SigmaV_BoneLock>false</ADC_Distribution_SigmaV_BoneLock> <ADC_Distribution_SigmaV_KidneyLock>false</ADC_Distributi…
<Chunk> <Organ>3</Organ> <TransporterID>BASAL_INFLUX_GUT</TransporterID> <Location>Basolateral</Location> <Function>Uptake</Function> <ClKmVmaxSwitch>false</ClKmVmaxSwitch> <ISEFT>1</ISEFT> <ISEF_T_VariationType>0</ISEF_T_VariationType> <ISEF_T_VariationValue>0</ISEF_T_VariationValue> <ISEFT_RAFREFSwitch>false</ISEFT_RAFREFSwitch> <CL_Screen>0</CL_Screen> <CL_VariationType>0</CL_VariationType> <C…
<Chunk> <KiFuinc_VariationValue>0</KiFuinc_VariationValue> </Transporter> <Transporter> <Enabled>false</Enabled> <Organ>6</Organ> <TransporterID>SLC51AB</TransporterID> <Location>Sinusoidal</Location> <Function>Uptake</Function> <ClKmVmaxSwitch>false</ClKmVmaxSwitch> <ISEFT>1</ISEFT> <ISEF_T_VariationType>0</ISEF_T_VariationType> <ISEF_T_VariationValue>0</ISEF_T_VariationValue> <ISEFT_RAFREFSwitc…
<Chunk>ariationType> <ISEF_T_VariationValue>0</ISEF_T_VariationValue> <ISEFT_RAFREFSwitch>false</ISEFT_RAFREFSwitch> <CL_Screen>0</CL_Screen> <CL_VariationType>0</CL_VariationType> <CL_VariationValue>0</CL_VariationValue> <Jmax_Screen>0</Jmax_Screen> <Jmax_VariationType>0</Jmax_VariationType> <Jmax_VariationValue>0</Jmax_VariationValue> <Km_Screen>1000000</Km_Screen> <Km_VariationType>0</Km_Varia…
<Chunk></KiFuinc_VariationType> <KiFuinc_VariationValue>0</KiFuinc_VariationValue> <ExtraParams /> </Transporter> </ReplacementOrganTransporterSet> <UserDefinedTransporterSet> <Transporter> <Enabled>false</Enabled> <Organ>13</Organ> <TransporterID>ABCB1</TransporterID> <Location>Apical</Location> <Function>Efflux</Function> <ClKmVmaxSwitch>false</ClKmVmaxSwitch> <ISEFT>1</ISEFT> <ISEF_T_Variation…
<Chunk>act_VariationType>0</Kinact_VariationType> <Kinact_VariationValue>0</Kinact_VariationValue> </InteractionRoute> <InteractionRoute> <Enzyme>4</Enzyme> <KiSwitch>false</KiSwitch> <Ki>1000000</Ki> <Fumic>1</Fumic> <KappSwitch>false</KappSwitch> <Kapp>1000000</Kapp> <Kinact>0</Kinact> <Kapp_fumic>1</Kapp_fumic> <IndSlopeSwitch>false</IndSlopeSwitch> <IndSlope>0</IndSlope> <IndSlopeCV>30</IndSl…
<Chunk>me> <Kon>0</Kon> <KonPadlockOpen>true</KonPadlockOpen> <Koff>0</Koff> <KoffPadlockOpen>true</KoffPadlockOpen> <Kint>0</Kint> <KintPadlockOpen>true</KintPadlockOpen> <Kss>1000000</Kss> <KssPadlockOpen>true</KssPadlockOpen> <Km>1000000</Km> <KmPadlockOpen>true</KmPadlockOpen> <Vmax>0</Vmax> <VmaxPadlockOpen>true</VmaxPadlockOpen> <Target>10</Target> </TMDDDar> </ArrayOfTMDDDar> <ArrayOfTMDDD…
<Chunk>9_fuinc> <idEK_HIM_Clint>0</idEK_HIM_Clint> <idEK_HLM_Clint>124.4</idEK_HLM_Clint> <idEK_HKM_Clint>0</idEK_HKM_Clint> <idEK_HIM_cv>0</idEK_HIM_cv> <idEK_HLM_cv>30</idEK_HLM_cv> <idEK_HKM_cv>30</idEK_HKM_cv> <idEK_HIM_fuinc>0</idEK_HIM_fuinc> <idEK_HLM_fuinc>1</idEK_HLM_fuinc> <idEK_HKM_fuinc>1</idEK_HKM_fuinc> <idEK_HIC_Clint>0</idEK_HIC_Clint> <idEK_HLC_Clint>0</idEK_HLC_Clint> <idEK_HKC_…
<Chunk> <idContModProfileCount1>2</idContModProfileCount1> <idContModProfileCount2>2</idContModProfileCount2> <idParticleSizeDistType>1</idParticleSizeDistType> <idNormalRadiusMean>20</idNormalRadiusMean> <idNormalRadiusMeanCV>30</idNormalRadiusMeanCV> <idLogNormalRadiusMean>20</idLogNormalRadiusMean> <idLogNormalRadiusMeanCV>30</idLogNormalRadiusMeanCV> <idWeibullAlpha>5</idWeibullAlpha> <idWeib…
<Chunk>e</idAvBoundCheckHeart> <idAvBoundCheckKidney>false</idAvBoundCheckKidney> <idAvBoundCheckLiver>false</idAvBoundCheckLiver> <idAvBoundCheckLung>false</idAvBoundCheckLung> <idAvBoundCheckMuscle>false</idAvBoundCheckMuscle> <idAvBoundCheckSkin>false</idAvBoundCheckSkin> <idAvBoundCheckSpleen>false</idAvBoundCheckSpleen> <idAvBoundCheckPlasma>false</idAvBoundCheckPlasma> <idAvBoundCheckRBC>fa…
<Chunk>6>10</OtherSiteProfileCV6> <OtherSiteProfileCV7>10</OtherSiteProfileCV7> <OtherSiteProfileCV8>10</OtherSiteProfileCV8> <OtherSiteProfileCV9>10</OtherSiteProfileCV9> <OtherSiteProfileCV10>10</OtherSiteProfileCV10> <OtherSiteProfileCV11>10</OtherSiteProfileCV11> <OtherSiteProfileCV12>10</OtherSiteProfileCV12> <OtherSiteProfileCV13>10</OtherSiteProfileCV13> <OtherSiteProfileCV14>10</OtherSite…
<Chunk> <idPeffManJej1Switch>false</idPeffManJej1Switch> <idPeffManJej2Switch>false</idPeffManJej2Switch> <idPeffManJej3Switch>false</idPeffManJej3Switch> <idPeffManJej4Switch>false</idPeffManJej4Switch> <idPeffManJej5Switch>false</idPeffManJej5Switch> <idPeffManIleumSwitch>false</idPeffManIleumSwitch> <idPeffManColonSwitch>true</idPeffManColonSwitch> <idPPPoreElecGradPotDropValue>0</idPPPoreElec…
<Chunk><Enabled>false</Enabled> <Organ>3</Organ> <TransporterID>SLC22A3</TransporterID> <Location>Apical</Location> <Function>Uptake</Function> <ClKmVmaxSwitch>false</ClKmVmaxSwitch> <ISEFT>1</ISEFT> <ISEF_T_VariationType>0</ISEF_T_VariationType> <ISEF_T_VariationValue>0</ISEF_T_VariationValue> <ISEFT_RAFREFSwitch>false</ISEFT_RAFREFSwitch> <CL_Screen>0</CL_Screen> <CL_VariationType>0</CL_Variati…
<Chunk>> <KiFuinc_VariationValue>0</KiFuinc_VariationValue> </Transporter> <Transporter> <Enabled>false</Enabled> <Organ>6</Organ> <TransporterID>SLCO1B1</TransporterID> <Location>Sinusoidal</Location> <Function>Uptake</Function> <ClKmVmaxSwitch>false</ClKmVmaxSwitch> <ISEFT>1</ISEFT> <ISEF_T_VariationType>0</ISEF_T_VariationType> <ISEF_T_VariationValue>0</ISEF_T_VariationValue> <ISEFT_RAFREFSwit…
<Chunk>.1</CLpd> <KiEnabled>false</KiEnabled> <Ki>1000000</Ki> <Ki_VariationType>0</Ki_VariationType> <Ki_VariationValue>0</Ki_VariationValue> <KiFuinc>1</KiFuinc> <KiFuinc_VariationType>0</KiFuinc_VariationType> <KiFuinc_VariationValue>0</KiFuinc_VariationValue> <ExtraParams /> </Transporter> <Transporter> <Enabled>false</Enabled> <Organ>2</Organ> <TransporterID>ABCG2</TransporterID> <Location>A…
<Chunk>ransporter> <Enabled>false</Enabled> <Organ>7</Organ> <TransporterID>APICAL_EFFLUX1_LUNG</TransporterID> <Location>Apical</Location> <Function>Efflux</Function> <ClKmVmaxSwitch>false</ClKmVmaxSwitch> <ISEFT>1</ISEFT> <ISEF_T_VariationType>0</ISEF_T_VariationType> <ISEF_T_VariationValue>0</ISEF_T_VariationValue> <ISEFT_RAFREFSwitch>false</ISEFT_RAFREFSwitch> <CL_Screen>0</CL_Screen> <CL_Var…
<Chunk> <IndC50>1000000</IndC50> <IndC50CV>30</IndC50CV> <IndC50_fuinc>1</IndC50_fuinc> <Y>1</Y> <Ki_VariationType>0</Ki_VariationType> <Ki_VariationValue>0</Ki_VariationValue> <Fumic_VariationType>0</Fumic_VariationType> <Fumic_VariationValue>0</Fumic_VariationValue> <IndC50_fuinc_VariationType>0</IndC50_fuinc_VariationType> <IndC50_fuinc_VariationValue>0</IndC50_fuinc_VariationValue> <Kapp_Vari…
<Chunk>KssPadlockOpen> <Km>1000000</Km> <KmPadlockOpen>true</KmPadlockOpen> <Vmax>0</Vmax> <VmaxPadlockOpen>true</VmaxPadlockOpen> <Target>0</Target> </TMDDDar> </ArrayOfTMDDDar> <ArrayOfTMDDDar> <TMDDDar> <DarNumber>0</DarNumber> <Name>DAR0</Name> <Kon>0</Kon> <KonPadlockOpen>true</KonPadlockOpen> <Koff>0</Koff> <KoffPadlockOpen>true</KoffPadlockOpen> <Kint>0</Kint> <KintPadlockOpen>true</KintPa…
<Chunk>30</idCL_MetPoBas_Var> <idCL_MetBas>74.1</idCL_MetBas> <idCL_MetBas_Var>30</idCL_MetBas_Var> <idPcnt3AMetCL>1E-05</idPcnt3AMetCL> <idPcnt3AMetCL_CV>30</idPcnt3AMetCL_CV> <idAddHLMClintVal>0</idAddHLMClintVal> <idAddHLMClintCV>30</idAddHLMClintCV> <idFum>1</idFum> <idCL_extra>0</idCL_extra> <idCL_extraCV>30</idCL_extraCV> <idFUinc2>1</idFUinc2> <idCLint_H_extra>0</idCLint_H_extra> <idCLint_…
<Chunk>6>1</idDissProfAFedTime6> <idDissProfAFedTime7>1</idDissProfAFedTime7> <idDissProfAFedTime8>1</idDissProfAFedTime8> <idDissProfAFedTime9>1</idDissProfAFedTime9> <idDissProfAFedTime10>1</idDissProfAFedTime10> <idDissProfAFedTime11>1</idDissProfAFedTime11> <idDissProfAFedTime12>1</idDissProfAFedTime12> <idDissProfAFedTime13>1</idDissProfAFedTime13> <idDissProfAFedTime14>1</idDissProfAFedTime…
<Chunk>Release2> <idDermalPatchReleaseRelease3>0</idDermalPatchReleaseRelease3> <idDermalPatchReleaseRelease4>0</idDermalPatchReleaseRelease4> <idDermalPatchReleaseRelease5>0</idDermalPatchReleaseRelease5> <idDermalPatchReleaseRelease6>0</idDermalPatchReleaseRelease6> <idDermalPatchReleaseRelease7>0</idDermalPatchReleaseRelease7> <idDermalPatchReleaseRelease8>0</idDermalPatchReleaseRelease8> <idD…
<Chunk>ProfileValue9>0</idBPProfileValue9> <idBPProfileValue10>0</idBPProfileValue10> <idBPProfileValue11>0</idBPProfileValue11> <idBPProfileValue12>0</idBPProfileValue12> <idBPProfileValue13>0</idBPProfileValue13> <idBPProfileValue14>0</idBPProfileValue14> <idBPProfileValue15>0</idBPProfileValue15> <idBPProfileValue16>0</idBPProfileValue16> <idBPProfileValue17>0</idBPProfileValue17> <idBPProfile…
<Chunk></MPMLA_DermalPatchReleaseTime18> <MPMLA_DermalPatchReleaseTime19>0</MPMLA_DermalPatchReleaseTime19> <MPMLA_DermalPatchReleaseRelease0>0</MPMLA_DermalPatchReleaseRelease0> <MPMLA_DermalPatchReleaseRelease1>100</MPMLA_DermalPatchReleaseRelease1> <MPMLA_DermalPatchReleaseRelease2>0</MPMLA_DermalPatchReleaseRelease2> <MPMLA_DermalPatchReleaseRelease3>0</MPMLA_DermalPatchReleaseRelease3> <MPML…
<Chunk>e> <Jmax_Screen>0</Jmax_Screen> <Jmax_VariationType>0</Jmax_VariationType> <Jmax_VariationValue>0</Jmax_VariationValue> <Km_Screen>1000000</Km_Screen> <Km_VariationType>0</Km_VariationType> <Km_VariationValue>0</Km_VariationValue> <CLint_fuinc>1</CLint_fuinc> <CLint_fuinc_VariationType>0</CLint_fuinc_VariationType> <CLint_fuinc_VariationValue>0</CLint_fuinc_VariationValue> <ScalingFactor>1…
<Chunk>L_Screen> <CL_VariationType>0</CL_VariationType> <CL_VariationValue>0</CL_VariationValue> <Jmax_Screen>0</Jmax_Screen> <Jmax_VariationType>0</Jmax_VariationType> <Jmax_VariationValue>0</Jmax_VariationValue> <Km_Screen>1000000</Km_Screen> <Km_VariationType>0</Km_VariationType> <Km_VariationValue>0</Km_VariationValue> <CLint_fuinc>1</CLint_fuinc> <CLint_fuinc_VariationType>0</CLint_fuinc_Var…
<Chunk>/ISEF_T_VariationType> <ISEF_T_VariationValue>0</ISEF_T_VariationValue> <ISEFT_RAFREFSwitch>false</ISEFT_RAFREFSwitch> <CL_Screen>0</CL_Screen> <CL_VariationType>0</CL_VariationType> <CL_VariationValue>0</CL_VariationValue> <Jmax_Screen>0</Jmax_Screen> <Jmax_VariationType>0</Jmax_VariationType> <Jmax_VariationValue>0</Jmax_VariationValue> <Km_Screen>1000000</Km_Screen> <Km_VariationType>0<…
<Chunk>_Screen>0</Jmax_Screen> <Jmax_VariationType>0</Jmax_VariationType> <Jmax_VariationValue>0</Jmax_VariationValue> <Km_Screen>1000000</Km_Screen> <Km_VariationType>0</Km_VariationType> <Km_VariationValue>0</Km_VariationValue> <CLint_fuinc>1</CLint_fuinc> <CLint_fuinc_VariationType>0</CLint_fuinc_VariationType> <CLint_fuinc_VariationValue>0</CLint_fuinc_VariationValue> <ScalingFactor>1</Scalin…
<Chunk>alue> <Kapp_fumic_VariationType>0</Kapp_fumic_VariationType> <Kapp_fumic_VariationValue>0</Kapp_fumic_VariationValue> <Kinact_VariationType>0</Kinact_VariationType> <Kinact_VariationValue>0</Kinact_VariationValue> </InteractionRoute> <InteractionRoute> <Enzyme>8</Enzyme> <KiSwitch>false</KiSwitch> <Ki>1000000</Ki> <Fumic>1</Fumic> <KappSwitch>false</KappSwitch> <Kapp>1000000</Kapp> <Kinact…
<Chunk> <Ki_VariationType>0</Ki_VariationType> <Ki_VariationValue>0</Ki_VariationValue> <Fumic_VariationType>0</Fumic_VariationType> <Fumic_VariationValue>0</Fumic_VariationValue> <IndC50_fuinc_VariationType>0</IndC50_fuinc_VariationType> <IndC50_fuinc_VariationValue>0</IndC50_fuinc_VariationValue> <Kapp_VariationType>0</Kapp_VariationType> <Kapp_VariationValue>0</Kapp_VariationValue> <Kapp_fumic…
<Chunk>anComp5> <idPeffmanComp6>3.49252915</idPeffmanComp6> <idPeffmanComp7>3.49252915</idPeffmanComp7> <idPeffmanComp8>3.49252915</idPeffmanComp8> <idKdegComp0>0</idKdegComp0> <idKdegComp1>0</idKdegComp1> <idKdegComp2>0</idKdegComp2> <idKdegComp3>0</idKdegComp3> <idKdegComp4>0</idKdegComp4> <idKdegComp5>0</idKdegComp5> <idKdegComp6>0</idKdegComp6> <idKdegComp7>0</idKdegComp7> <idKdegComp8>0</idK…
<Chunk>FedRelease1>0</idDissProfBFedRelease1> <idDissProfBFedRelease2>100</idDissProfBFedRelease2> <idDissProfBFedRelease3>1</idDissProfBFedRelease3> <idDissProfBFedRelease4>1</idDissProfBFedRelease4> <idDissProfBFedRelease5>1</idDissProfBFedRelease5> <idDissProfBFedRelease6>1</idDissProfBFedRelease6> <idDissProfBFedRelease7>1</idDissProfBFedRelease7> <idDissProfBFedRelease8>1</idDissProfBFedRele…
<Chunk>LCalcUserQr> <idRenalCLCalcUserKidneyWeight>0</idRenalCLCalcUserKidneyWeight> <idRenalCLCalcParamsMethod>0</idRenalCLCalcParamsMethod> <idRenalCLCalcParamsSingleMethod>0</idRenalCLCalcParamsSingleMethod> <idRenalCLCalcParamsMultiMethod>0</idRenalCLCalcParamsMultiMethod> <idRenalCLCalcParamsAddFuCorrection>false</idRenalCLCalcParamsAddFuCorrection> <idRenalCLCalcParamsAddQRCorrection>false<…
<Chunk>rainCSF> <idFuintFetoPlacenta>1</idFuintFetoPlacenta> <idFuintPancreas>1</idFuintPancreas> <idFuTissueAdipose>1</idFuTissueAdipose> <idFuTissueBone>1</idFuTissueBone> <idFuTissueBrain>1</idFuTissueBrain> <idFuTissueGut>1</idFuTissueGut> <idFuTissueHeart>1</idFuTissueHeart> <idFuTissueKidney>1</idFuTissueKidney> <idFuTissueLiver>1</idFuTissueLiver> <idFuTissueLung>1</idFuTissueLung> <idFuTi…
<Chunk>A_fuSC>0</MPMLA_fuSC> <MPMLA_KonLock>false</MPMLA_KonLock> <MPMLA_Kon>0</MPMLA_Kon> <MPMLA_KoffLock>false</MPMLA_KoffLock> <MPMLA_Koff>0</MPMLA_Koff> <MPMLA_PcellLock>false</MPMLA_PcellLock> <MPMLA_Pcell>1E-05</MPMLA_Pcell> <MPMLA_IsFormAciditySkinAcidity>false</MPMLA_IsFormAciditySkinAcidity> <MPMLA_Formulation_pH>5.5</MPMLA_Formulation_pH> <MPMLA_Formulation_pHCV>30</MPMLA_Formulation_pH…
<Chunk>> <ADC_AddOrgan_FR>0.715</ADC_AddOrgan_FR> <ADC_AddOrgan_Frel>1</ADC_AddOrgan_Frel> <ADC_AddOrgan_FrelCV>30</ADC_AddOrgan_FrelCV> <ADC_AddOrgan_Krc1_DAR_N>0.76</ADC_AddOrgan_Krc1_DAR_N> <ADC_AddOrgan_Krc2_DAR_N>0.76</ADC_AddOrgan_Krc2_DAR_N> <ADC_AddOrgan_Krel>1</ADC_AddOrgan_Krel> <ADC_AddOrgan_KrelCV>30</ADC_AddOrgan_KrelCV> <ADC_AddOrgan_Kup_DAR_N>0.0297</ADC_AddOrgan_Kup_DAR_N> <ADC_Ad…
<Chunk>actor_VariationType>0</ScalingFactor_VariationType> <ScalingFactor_VariationValue>0</ScalingFactor_VariationValue> <A_Screen>1</A_Screen> <SystemEnabled>false</SystemEnabled> <System>0</System> <CLpd>0.1</CLpd> <KiEnabled>false</KiEnabled> <Ki>1000000</Ki> <Ki_VariationType>0</Ki_VariationType> <Ki_VariationValue>0</Ki_VariationValue> <KiFuinc>1</KiFuinc> <KiFuinc_VariationType>0</KiFuinc_…
<Chunk>inc_VariationType>0</CLint_fuinc_VariationType> <CLint_fuinc_VariationValue>0</CLint_fuinc_VariationValue> <ScalingFactor>1</ScalingFactor> <ScalingFactor_VariationType>0</ScalingFactor_VariationType> <ScalingFactor_VariationValue>0</ScalingFactor_VariationValue> <A_Screen>1</A_Screen> <SystemEnabled>false</SystemEnabled> <System>0</System> <CLpd>0.1</CLpd> <KiEnabled>false</KiEnabled> <Ki…
<Chunk>rue</SystemEnabled> <System>0</System> <CLpd>0.1</CLpd> <KiEnabled>false</KiEnabled> <Ki>1000000</Ki> <Ki_VariationType>0</Ki_VariationType> <Ki_VariationValue>0</Ki_VariationValue> <KiFuinc>1</KiFuinc> <KiFuinc_VariationType>0</KiFuinc_VariationType> <KiFuinc_VariationValue>0</KiFuinc_VariationValue> <ExtraParams /> </Transporter> <Transporter> <Enabled>false</Enabled> <Organ>5</Organ> <T…
<Chunk> <IndSlopeSwitch>false</IndSlopeSwitch> <IndSlope>0</IndSlope> <IndSlopeCV>30</IndSlopeCV> <IndMax>1</IndMax> <IndMaxCV>30</IndMaxCV> <IndC50Switch>false</IndC50Switch> <IndC50>1000000</IndC50> <IndC50CV>30</IndC50CV> <IndC50_fuinc>1</IndC50_fuinc> <Y>1</Y> <Ki_VariationType>0</Ki_VariationType> <Ki_VariationValue>0</Ki_VariationValue> <Fumic_VariationType>0</Fumic_VariationType> <Fumic_Va…
<Chunk>> <Kinact_VariationValue>0</Kinact_VariationValue> </InteractionRoute> <InteractionRoute> <Enzyme>14</Enzyme> <KiSwitch>false</KiSwitch> <Ki>1000000</Ki> <Fumic>1</Fumic> <KappSwitch>false</KappSwitch> <Kapp>1000000</Kapp> <Kinact>0</Kinact> <Kapp_fumic>1</Kapp_fumic> <IndSlopeSwitch>false</IndSlopeSwitch> <IndSlope>0</IndSlope> <IndSlopeCV>30</IndSlopeCV> <IndMax>1</IndMax> <IndMaxCV>30</…
<Chunk>efCompEnabled6> <idMDCKRefCompEnabled7>false</idMDCKRefCompEnabled7> <idMDCKRefCompoundValue1>6.6</idMDCKRefCompoundValue1> <idMDCKRefCompoundValue2>1</idMDCKRefCompoundValue2> <idMDCKRefCompoundValue3>22</idMDCKRefCompoundValue3> <idMDCKRefCompoundValue4>16.2</idMDCKRefCompoundValue4> <idMDCKRefCompoundValue5>61.5</idMDCKRefCompoundValue5> <idMDCKRefCompoundValue6>24</idMDCKRefCompoundVal…
<Chunk> <DisintegrationReleaseTime18>0</DisintegrationReleaseTime18> <DisintegrationReleaseTime19>0</DisintegrationReleaseTime19> <DisintegrationReleaseRelease0>0</DisintegrationReleaseRelease0> <DisintegrationReleaseRelease1>100</DisintegrationReleaseRelease1> <DisintegrationReleaseRelease2>0</DisintegrationReleaseRelease2> <DisintegrationReleaseRelease3>0</DisintegrationReleaseRelease3> <Disint…
<Chunk>ted>0.1</idfuEWFetoPlacentaPredicted> <idfuEWPancreasPredicted>0.1</idfuEWPancreasPredicted> <idReplacementOrganCheck>false</idReplacementOrganCheck> <idReplacedOrgan>0</idReplacedOrgan> <idUserDefinedOrganCheck>false</idUserDefinedOrganCheck> <ADCUserDefinedOrganSwitch>false</ADCUserDefinedOrganSwitch> <UserDefinedOrganType>0</UserDefinedOrganType> <idReplacementOrganCLPD>0.1</idReplaceme…
<Chunk> <BioPSlBoundAdditionalOrgan>0.01</BioPSlBoundAdditionalOrgan> <BioPSlBoundBrainCSF>0</BioPSlBoundBrainCSF> <BioPSlBoundFetoPlacenta>0.001</BioPSlBoundFetoPlacenta> <BioPSlBoundPancreas>0.001</BioPSlBoundPancreas> <BioPSlBoundCVAdipose>30</BioPSlBoundCVAdipose> <BioPSlBoundCVBone>30</BioPSlBoundCVBone> <BioPSlBoundCVBrain>30</BioPSlBoundCVBrain> <BioPSlBoundCVGut>30</BioPSlBoundCVGut> <Bio…
<Chunk>aleWColonMRTFinePartsCV>47</MaleWColonMRTFinePartsCV> <MaleAColonMRTFineParts>18.88</MaleAColonMRTFineParts> <MaleAColonMRTFinePartsCV>47</MaleAColonMRTFinePartsCV> <FemaleWColonMRTFineParts>52.87</FemaleWColonMRTFineParts> <FemaleWColonMRTFinePartsCV>47</FemaleWColonMRTFinePartsCV> <FemaleAColonMRTFineParts>26.9</FemaleAColonMRTFineParts> <FemaleAColonMRTFinePartsCV>47</FemaleAColonMRTFin…
<Chunk> <ADC_Distribution_PS_KidneyLock>false</ADC_Distribution_PS_KidneyLock> <ADC_Distribution_PS_GutLock>false</ADC_Distribution_PS_GutLock> <ADC_Distribution_PS_SpleenLock>false</ADC_Distribution_PS_SpleenLock> <ADC_Distribution_PS_PancreasLock>false</ADC_Distribution_PS_PancreasLock> <ADC_Distribution_PS_LiverLock>false</ADC_Distribution_PS_LiverLock> <ADC_Distribution_PS_AddOrganLock>false<…
<Chunk> </Transporter> <Transporter> <Enabled>false</Enabled> <Organ>3</Organ> <TransporterID>SLCO4C1</TransporterID> <Location>Basolateral</Location> <Function>Uptake</Function> <ClKmVmaxSwitch>false</ClKmVmaxSwitch> <ISEFT>1</ISEFT> <ISEF_T_VariationType>0</ISEF_T_VariationType> <ISEF_T_VariationValue>0</ISEF_T_VariationValue> <ISEFT_RAFREFSwitch>false</ISEFT_RAFREFSwitch> <CL_Screen>0</CL_Scre…
<Chunk>KiFuinc> <KiFuinc_VariationType>0</KiFuinc_VariationType> <KiFuinc_VariationValue>0</KiFuinc_VariationValue> </Transporter> <Transporter> <Enabled>false</Enabled> <Organ>6</Organ> <TransporterID>ABCC3</TransporterID> <Location>Sinusoidal</Location> <Function>Efflux</Function> <ClKmVmaxSwitch>false</ClKmVmaxSwitch> <ISEFT>1</ISEFT> <ISEF_T_VariationType>0</ISEF_T_VariationType> <ISEF_T_Vari…
<Chunk> <ClKmVmaxSwitch>false</ClKmVmaxSwitch> <ISEFT>1</ISEFT> <ISEF_T_VariationType>0</ISEF_T_VariationType> <ISEF_T_VariationValue>0</ISEF_T_VariationValue> <ISEFT_RAFREFSwitch>false</ISEFT_RAFREFSwitch> <CL_Screen>0</CL_Screen> <CL_VariationType>0</CL_VariationType> <CL_VariationValue>0</CL_VariationValue> <Jmax_Screen>0</Jmax_Screen> <Jmax_VariationType>0</Jmax_VariationType> <Jmax_Variation…
<Chunk>i>1000000</Ki> <Ki_VariationType>0</Ki_VariationType> <Ki_VariationValue>0</Ki_VariationValue> <KiFuinc>1</KiFuinc> <KiFuinc_VariationType>0</KiFuinc_VariationType> <KiFuinc_VariationValue>0</KiFuinc_VariationValue> <ExtraParams /> </Transporter> </UserDefinedTransporterSet> <CYPRoutes /> <CYPAllelicRoutes /> <UGTRoutes /> <EnzCytRoutes /> <EsteraseRoutes> <MetRoute> <Enabled>false</Enable…
<Chunk>Switch>false</IndC50Switch> <IndC50>1000000</IndC50> <IndC50CV>30</IndC50CV> <IndC50_fuinc>1</IndC50_fuinc> <Y>1</Y> <Ki_VariationType>0</Ki_VariationType> <Ki_VariationValue>0</Ki_VariationValue> <Fumic_VariationType>0</Fumic_VariationType> <Fumic_VariationValue>0</Fumic_VariationValue> <IndC50_fuinc_VariationType>0</IndC50_fuinc_VariationType> <IndC50_fuinc_VariationValue>0</IndC50_fuinc…
<Chunk> </ADC_DistributionDars> <Paed_AgeFuProfile /> <idMW>243.34</idMW> <idFu1>0.55</idFu1> <idBP>1</idBP> <idName>SV-3-HydroxyMorphinan</idName> <idLogP>2.66</idLogP> <idCompoundType>3</idCompoundType> <idpH>7.4</idpH> <idpKa1>10.6</idpKa1> <idpKa2>10.6</idpKa2> <idHaem>45</idHaem> <idFu2>0.423066735</idFu2> <idFu3>1</idFu3> <idFu4>0.55</idFu4> <idPRef>45</idPRef> <idHaemCheck>false</idHaemChe…
<Chunk>1</float> <float>1</float> <float>1</float> <float>1</float> <float>1</float> <float>1</float> <float>1</float> </AdultFractions> <ProfileCount>2</ProfileCount> <Type>0</Type> </OntogenyData> </Ontogenies> <idSolubilitypH1>7.4</idSolubilitypH1> <idSolubilitypH2>7.4001</idSolubilitypH2> <idSolubilitypH3>7.4001</idSolubilitypH3> <idSolubilitypH4>7.4001</idSolubilitypH4> <idSolubilitypH5>7.40…
<Chunk>mentBrainModel>false</Use6CompartmentBrainModel> <idPSB>0</idPSB> <idPSBCheck>true</idPSBCheck> <fuICFSwitch>false</fuICFSwitch> <idfumass>1</idfumass> <idfumassPredicted>0.5771569</idfumassPredicted> <fuICF>0</fuICF> <fuICFPredicted>0</fuICFPredicted> <idPSC>0</idPSC> <idfuCSF>1</idfuCSF> <idPSE>300</idPSE> <BP>0</BP> <idBPPredicted>0</idBPPredicted> <PSC_CV>30</PSC_CV> <PSI>0</PSI> <PSI_…
<Chunk> <idAvBoundKidney>1</idAvBoundKidney> <idAvBoundLiver>1</idAvBoundLiver> <idAvBoundLung>1</idAvBoundLung> <idAvBoundMuscle>1</idAvBoundMuscle> <idAvBoundSkin>1</idAvBoundSkin> <idAvBoundSpleen>1</idAvBoundSpleen> <idAvBoundPlasma>1</idAvBoundPlasma> <idAvBoundRBC>1</idAvBoundRBC> <idAvBoundAdditionalOrgan>1</idAvBoundAdditionalOrgan> <idAvBoundBrainCSF>0</idAvBoundBrainCSF> <idAvBoundFetoP…
<Chunk>ystemProfile>0</CRMRSystemProfile> <DLMScalarSwitch>false</DLMScalarSwitch> <SuperSaturationSwitch>false</SuperSaturationSwitch> <PrecipitationRateSwitch>false</PrecipitationRateSwitch> <DLMScalarGlobal>1</DLMScalarGlobal> <DLMScalarStomach>1</DLMScalarStomach> <DLMScalarDuodenum>1</DLMScalarDuodenum> <DLMScalarJejunum1>1</DLMScalarJejunum1> <DLMScalarJejunum2>1</DLMScalarJejunum2> <DLMSca…
<Chunk>_Pancreas> <ADC_Distribution_SigmaV_Liver>0.22</ADC_Distribution_SigmaV_Liver> <ADC_Distribution_SigmaL_Lung>0.2</ADC_Distribution_SigmaL_Lung> <ADC_Distribution_SigmaL_Heart>0.2</ADC_Distribution_SigmaL_Heart> <ADC_Distribution_SigmaL_Brain>0.2</ADC_Distribution_SigmaL_Brain> <ADC_Distribution_SigmaL_Muscle>0.2</ADC_Distribution_SigmaL_Muscle> <ADC_Distribution_SigmaL_Skin>0.2</ADC_Distri…
<Chunk>idETMean_ABCG2> <idETMean_INFLUXBBB>1</idETMean_INFLUXBBB> <idETMeanCV_ABCB1>0</idETMeanCV_ABCB1> <idETMeanCV_ABCC4>0</idETMeanCV_ABCC4> <idETMeanCV_ABCG2>0</idETMeanCV_ABCG2> <idETMeanCV_INFLUXBBB>0</idETMeanCV_INFLUXBBB> <idETMean_APICALIN>1</idETMean_APICALIN> <idETMean_APICALEF>1</idETMean_APICALEF> <idETMeanCV_APICALIN>0</idETMeanCV_APICALIN> <idETMeanCV_APICALEF>0</idETMeanCV_APICALE…
<Chunk>lad_Female>1</idQblad_Female> <idBypassGlom>10</idBypassGlom> <idBypassGlomCV>30</idBypassGlomCV> <idBypassHenlesLoop>20</idBypassHenlesLoop> <idBypassHenlesLoopCV>30</idBypassHenlesLoopCV> <idKidneyWeightCV>23.4</idKidneyWeightCV> <GlomerularFiltrationRate>0</GlomerularFiltrationRate> <idSmallPoreRadius>4.4</idSmallPoreRadius> <idSmallPoreRadiusSwitch>false</idSmallPoreRadiusSwitch> <idLa…
<Chunk>eqUGTUser2> <idV12IMFreqUGTUser3>0</idV12IMFreqUGTUser3> <idV12IMFreqUGTUser4>0</idV12IMFreqUGTUser4> <idIMFreq1A1>0.44</idIMFreq1A1> <idIMFreq1A3>0</idIMFreq1A3> <idIMFreq1A4>0</idIMFreq1A4> <idIMFreq1A5>0</idIMFreq1A5> <idIMFreq1A6>0</idIMFreq1A6> <idIMFreq1A7>0</idIMFreq1A7> <idIMFreq1A8>0</idIMFreq1A8> <idIMFreq1A9>0</idIMFreq1A9> <idIMFreq1A10>0</idIMFreq1A10> <idIMFreq2B4>0</idIMFreq…
<Chunk>MMean2B17>1</idEMMean2B17> <idEMMean2B28>1</idEMMean2B28> <idEMMeanUGTUser1>1</idEMMeanUGTUser1> <ZonalCypList> <ZonalEntity> <Number>-1</Number> <Zone2>0.166666672</Zone2> <Zone3>0.166666672</Zone3> <Zone4>0.166666672</Zone4> <Zone5>0.166666672</Zone5> <Zone6>0.166666672</Zone6> </ZonalEntity> </ZonalCypList> <ZonalUgtList> <ZonalEntity> <Number>-1</Number> <Zone2>0.166666672</Zone2> <Zon…
<Chunk>CQBzAGMAOgBzAGUAdABQAGEAcgBhAG0AZQB0AGUAcgAoADgANAAsACAAcwBjADoAcwBhAG0AcABsAGUAUgBhAG4AZABvAG0ARABpAHMAdAByAGkAYgB1AHQAaQBvAG4AKABzAGMALgBMAE8ARwBOAE8AUgBNAEEATABfAEMAVgAsACAAMAAuADAANQAgAC8AIAAyADQALAAgADEAMAApACkACQAJAC0ALQAgAGEAbABwAGgAYQAyADAADQAKAAkAcwBjADoAcwBlAHQAUABhAHIAYQBtAGUAdABlAHIAKAA4ADUALAAgAHMAYwA6AHMAYQBtAHAAbABlAFIAYQBuAGQAbwBtAEQAaQBzAHQAcgBpAGIAdQB0AGkAbwBuACgAcwBjAC4A…
<Chunk>CgAJAGcAdQBbADcAXQAgAD0AIABQAGEAcgBhAG0AcwAuAGEAMQBBACAAKgAgACgARABpAGYAZgBzAC4ATQBBACAAKwAgAFAAYQByAGEAbQBzAC4AdwAyACAAKgAgAEQAaQBmAGYAcwAuAE0ASQApAA0ACgAJAAkACQArACAAUABhAHIAYQBtAHMALgBzAHIAMQBCACAAKgAgAEMAbwBtADUADQAKAAkACQAJACsAIABQAGEAcgBhAG0AcwAuAGEAMgAgACoAIABEAGkAZgBmAHMALgBUADgAMAAgACoAIAAoAEQAaQBmAGYAcwAuAE0AQQAgAC8AIAAoAEQAaQBmAGYAcwAuAE0AQQAgACsAIABQAGEAcgBhAG0AcwAuAGMAMQA1ACkA…
<Chunk>ney>0.11</CYP3A4_idEq1_FBirth_LiverKidney> <CYP3A5_idEq1_FBirth_LiverKidney>0.11</CYP3A5_idEq1_FBirth_LiverKidney> <CYP3A7_idEq1_FBirth_LiverKidney>33</CYP3A7_idEq1_FBirth_LiverKidney> <CYP2C9_idEq1_FBirth_Gut>0.42</CYP2C9_idEq1_FBirth_Gut> <CYP2C19_idEq1_FBirth_Gut>0.42</CYP2C19_idEq1_FBirth_Gut> <CYP2D6_idEq1_FBirth_Gut>0.42</CYP2D6_idEq1_FBirth_Gut> <CYP2J2_idEq1_FBirth_Gut>0.42</CYP2J2…
<Chunk>ney>0</CYP2C8_idEq3_C0_LiverKidney> <CYP2C9_idEq3_C0_LiverKidney>0</CYP2C9_idEq3_C0_LiverKidney> <CYP2C18_idEq3_C0_LiverKidney>0</CYP2C18_idEq3_C0_LiverKidney> <CYP2C19_idEq3_C0_LiverKidney>0</CYP2C19_idEq3_C0_LiverKidney> <CYP2D6_idEq3_C0_LiverKidney>0</CYP2D6_idEq3_C0_LiverKidney> <CYP2E1_idEq3_C0_LiverKidney>0</CYP2E1_idEq3_C0_LiverKidney> <CYP2J2_idEq3_C0_LiverKidney>0</CYP2J2_idEq3_C0…
<Chunk>n>0</Function> <HasPowerFunction>false</HasPowerFunction> <UserScript>ZgB1AG4AYwB0AGkAbwBuACAAZABlAGYAaQBuAGUATwBuAHQAbwBnAGUAbgB5AF8ARQBOAFoAXwAzAEEANwBfAEwAaQB2AGUAcgBLAGkAZABuAGUAeQAoAFAATQBBACwAIABQAE4AQQAsACAARwBXACkADQAKAAkALQAtACAAUABNAEEAIABpAHMAIAB0AGgAZQAgAHAAbwBzAHQAbQBlAG4AcwB0AHIAdQBhAGwAIABhAGcAZQAgAGkAbgAgAHkAZQBhAHIAcwAgAA0ACgAJAC0ALQAgAFAATgBBACAAaQBzACAAdABoAGUAIABwAG8Acw…
<Chunk>er_C1> <Power_Exp>0</Power_Exp> <Power_PMA_Cap>10</Power_PMA_Cap> </PretermOntogenyItem> <PretermOntogenyItem ID="ENZ_2D6_Gut"> <Function>0</Function> <HasPowerFunction>false</HasPowerFunction> <UserScript>ZgB1AG4AYwB0AGkAbwBuACAAZABlAGYAaQBuAGUATwBuAHQAbwBnAGUAbgB5AF8ARQBOAFoAXwAyAEQANgBfAEcAdQB0ACgAUABNAEEALAAgAFAATgBBACwAIABHAFcAKQANAAoACQAtAC0AIABQAE0AQQAgAGkAcwAgAHQAaABlACAAcABvAHMAdA…
<Chunk>inThickness_Exponential_C2> <ForeHead_LocalSubcutaneousThickness_EquationSwitch>0</ForeHead_LocalSubcutaneousThickness_EquationSwitch> <ForeHead_LocalSubcutaneousThickness_Male_Sigmoidal_Adultmax>1.19</ForeHead_LocalSubcutaneousThickness_Male_Sigmoidal_Adultmax> <ForeHead_LocalSubcutaneousThickness_Male_Sigmoidal_Fbirth>0.67</ForeHead_LocalSubcutaneousThickness_Male_Sigmoidal_Fbirth> <Fore…
<Chunk>dal_Age50>1</FaceCheek_SkinSurfacepH_Male_Sigmoidal_Age50> <FaceCheek_SkinSurfacepH_Male_Sigmoidal_n>1</FaceCheek_SkinSurfacepH_Male_Sigmoidal_n> <FaceCheek_SkinSurfacepH_Female_Sigmoidal_Adultmax>1</FaceCheek_SkinSurfacepH_Female_Sigmoidal_Adultmax> <FaceCheek_SkinSurfacepH_Female_Sigmoidal_Fbirth>1</FaceCheek_SkinSurfacepH_Female_Sigmoidal_Fbirth> <FaceCheek_SkinSurfacepH_Female_Sigmoida…
<Chunk>1>0</Back_TotalSkinThickness_Exponential_C1> <Back_TotalSkinThickness_Exponential_C2>0</Back_TotalSkinThickness_Exponential_C2> <Back_LocalSubcutaneousThickness_EquationSwitch>0</Back_LocalSubcutaneousThickness_EquationSwitch> <Back_LocalSubcutaneousThickness_Male_Sigmoidal_Adultmax>1.19</Back_LocalSubcutaneousThickness_Male_Sigmoidal_Adultmax> <Back_LocalSubcutaneousThickness_Male_Sigmoid…
<Chunk>ce_SkinTemp_CV> <MPML_Male_LowerLeg_SkinTemp_CV>0</MPML_Male_LowerLeg_SkinTemp_CV> <MPML_Male_UpperLeg_SkinTemp_CV>0</MPML_Male_UpperLeg_SkinTemp_CV> <MPML_Male_Back_SkinTemp_CV>0</MPML_Male_Back_SkinTemp_CV> <MPML_Female_Forehead_SkinTemp_CV>0</MPML_Female_Forehead_SkinTemp_CV> <MPML_Female_InnerForearm_SkinTemp_CV>0</MPML_Female_InnerForearm_SkinTemp_CV> <MPML_Female_OuterForearm_SkinTem…
<Chunk>ale_Face_ShaftDiameterCV>57</MPML_Male_Face_ShaftDiameterCV> <MPML_Male_LowerLeg_ShaftDiameterCV>29</MPML_Male_LowerLeg_ShaftDiameterCV> <MPML_Male_UpperLeg_ShaftDiameterCV>41</MPML_Male_UpperLeg_ShaftDiameterCV> <MPML_Male_Back_ShaftDiameterCV>37</MPML_Male_Back_ShaftDiameterCV> <MPML_Female_Forehead_ShaftDiameterCV>57</MPML_Female_Forehead_ShaftDiameterCV> <MPML_Female_InnerForearm_Shaft…
<Chunk>erArm_CorneocyteLengthMid1CV> <MPML_Female_Face_CorneocyteLengthMid1CV>4.1</MPML_Female_Face_CorneocyteLengthMid1CV> <MPML_Female_LowerLeg_CorneocyteLengthMid1CV>5.7</MPML_Female_LowerLeg_CorneocyteLengthMid1CV> <MPML_Female_UpperLeg_CorneocyteLengthMid1CV>14.6</MPML_Female_UpperLeg_CorneocyteLengthMid1CV> <MPML_Female_Back_CorneocyteLengthMid1CV>5.7</MPML_Female_Back_CorneocyteLengthMid1C…
<Chunk>34.2</MPML_Male_Forehead_CorneocyteLengthBottom> <MPML_Male_InnerForearm_CorneocyteLengthBottom>36.4</MPML_Male_InnerForearm_CorneocyteLengthBottom> <MPML_Male_OuterForearm_CorneocyteLengthBottom>36.4</MPML_Male_OuterForearm_CorneocyteLengthBottom> <MPML_Male_UpperArm_CorneocyteLengthBottom>40.4</MPML_Male_UpperArm_CorneocyteLengthBottom> <MPML_Male_Face_CorneocyteLengthBottom>34.2</MPML_M…
<Chunk>_DuodenalBileConcFasted_Eq2_C1> <PaedGITract_DuodenalBileConcFasted_Eq2_C2>10.2</PaedGITract_DuodenalBileConcFasted_Eq2_C2> <PaedGITract_DuodenalBileConcFasted_Eq2_C3>0.32</PaedGITract_DuodenalBileConcFasted_Eq2_C3> <PaedGITract_DuodenalBileConcFasted_Eq2_C4>0.023</PaedGITract_DuodenalBileConcFasted_Eq2_C4> <PaedGITract_DuodenalBileConcFasted_V1>1</PaedGITract_DuodenalBileConcFasted_V1> <P…
<Chunk>Fed> <idIle2CMCFed>1</idIle2CMCFed> <idIle3CMCFed>1</idIle3CMCFed> <idIle4CMCFed>1</idIle4CMCFed> <idColonCMCFed>1</idColonCMCFed> <idStomachCMCFed>1</idStomachCMCFed> <idDuoBileFed>8.74</idDuoBileFed> <idJej1BileFed>10.03</idJej1BileFed> <idJej2BileFed>4.79</idJej2BileFed> <idIle1BileFed>5.86</idIle1BileFed> <idIle2BileFed>8.61</idIle2BileFed> <idIle3BileFed>8.06</idIle3BileFed> <idIle4Bi…
<Chunk>yACCScalar>true</ApplyACCScalar> <idPPPoreElecGradPotDropValue>-64.145</idPPPoreElecGradPotDropValue> <idPPParaScalarValue>0.00039</idPPParaScalarValue> <UseNEWEModel>false</UseNEWEModel> <EnterocyteLifespan>120</EnterocyteLifespan> <EnterocyteLifespanCV>30</EnterocyteLifespanCV> <EnterocyteGroups>100</EnterocyteGroups> <FastedLagFluid>0</FastedLagFluid> <FastedLagFluidCV>0</FastedLagFluid…
<Chunk>ADIAXgAyAC4ANQAgACsAIABhAGcAZQBeADIALgA1ACkAKQAgACAAIAAgACAADQAKAAkACQBlAG4AZAANAAoADQAKAAkAZQBsAHMAZQBpAGYAIAAgAFQAaQBzAHMAdQBlACAAIAA9AD0AIAAgADYAOQAgAHQAaABlAG4AIAAgAA0ACgAJAAkALQAtACAAQgBvAG4AZQANAAoACQAJAEIARgAgAD0AIAA1AC4AMAAwACAAIAAgAA0ACgANAAoACQBlAGwAcwBlAGkAZgAgACAAVABpAHMAcwB1AGUAIAAgAD0APQAgACAANwAxACAAdABoAGUAbgAgACAADQAKAAkACQAtAC0AIABTAHQAbwBtAGEAYwBoACAAYQBuAGQAIABPAGUAcwBv…
<Chunk>LPP>0.161</Periportal1_KpLPP> <Periportal1_pH_IW>7</Periportal1_pH_IW> <Periportal1_pH_EW>7.4</Periportal1_pH_EW> <Periportal2_VS>5</Periportal2_VS> <Periportal2_EW>16.5</Periportal2_EW> <Periportal2_IW>58.6</Periportal2_IW> <Periportal2_NL>3.48</Periportal2_NL> <Periportal2_NP>2.52</Periportal2_NP> <Periportal2_AP>5.09</Periportal2_AP> <Periportal2_KpALB>0.086</Periportal2_KpALB> <Peripor…
<Chunk>yimmean1A9> <idKidneyimmean1A10>0</idKidneyimmean1A10> <idKidneyimmean2B4>0</idKidneyimmean2B4> <idKidneyimmean2B7>0</idKidneyimmean2B7> <idKidneyimmean2B10>0</idKidneyimmean2B10> <idKidneyimmean2B11>0</idKidneyimmean2B11> <idKidneyimmean2B15>0.47</idKidneyimmean2B15> <idKidneyimmean2B17>0.16</idKidneyimmean2B17> <idKidneyimmean2B28>0</idKidneyimmean2B28> <idKidneyIMMeanUGTUser1>0</idKidne…
<Chunk>no2>0</idEMMeanCVAllele2Geno2> <idEMMeanCVAllele2Geno3>0</idEMMeanCVAllele2Geno3> <idEMMeanCVAllele2Geno4>0</idEMMeanCVAllele2Geno4> <idEMMeanCVAllele2Geno5>0</idEMMeanCVAllele2Geno5> <idEMMeanCVAllele2Geno6>0</idEMMeanCVAllele2Geno6> <idEMCVCytUser1>30</idEMCVCytUser1> <idEMCVCytUser2>30</idEMCVCytUser2> <idEMCVCytUser3>30</idEMCVCytUser3> <idEMCVCytUser4>30</idEMCVCytUser4> <idPMFreq1A2>…
<Chunk>LC22A9> <idUTFreqSLC22A9>0</idUTFreqSLC22A9> <idUTMean_SLC22A9>0</idUTMean_SLC22A9> <idUTMeanCV_SLC22A9>0</idUTMeanCV_SLC22A9> <idPTFreqSLC47A1>0</idPTFreqSLC47A1> <idPTMean_SLC47A1>0</idPTMean_SLC47A1> <idPTMeanCV_SLC47A1>0</idPTMeanCV_SLC47A1> <idETMean_SLC47A1>1</idETMean_SLC47A1> <idETMeanCV_SLC47A1>31</idETMeanCV_SLC47A1> <idITFreqSLC47A1>0</idITFreqSLC47A1> <idITMean_SLC47A1>0</idITM…
<Chunk>gAGMAZQBsAGwAIABwAG8AcAB1AGwAYQB0AGkAbwBuAHMADQAKAAkAcwBjADoAcwBlAHQAVQBzAGUAcgBTAHQAYQB0AGUATgBhAG0AZQAoADQALAAgACcAVAAwACAALQAgAFAAcgBlAGMAdQByAHMAbwByACAAQwBEADQAKwAgAGMAZQBsAGwAcwAnACkADQAKAAkAcwBjADoAcwBlAHQAVQBzAGUAcgBTAHQAYQB0AGUATgBhAG0AZQAoADUALAAgACcAVAAxACAALQAgAFQAIABoAGUAbABwAGUAcgAgADEAIABjAGUAbABsAHMAJwApAA0ACgAJAHMAYwA6AHMAZQB0AFUAcwBlAHIAUwB0AGEAdABlAE4AYQBtAGUAKAA2ACwAIAA…
<Chunk>hAG0AZQAoADcAMwAsACAAJwBXADEAJwApAA0ACgAJAHMAYwA6AHMAZQB0AFAAYQByAGEAbQBlAHQAZQByAE4AYQBtAGUAKAA3ADQALAAgACcAVwAyACcAKQANAAoACQBzAGMAOgBzAGUAdABQAGEAcgBhAG0AZQB0AGUAcgBOAGEAbQBlACgANwA1ACwAIAAnAFcAMwAnACkADQAKAAkAcwBjADoAcwBlAHQAUABhAHIAYQBtAGUAdABlAHIATgBhAG0AZQAoADcANgAsACAAJwBhADEAMQAnACkADQAKAAkAcwBjADoAcwBlAHQAUABhAHIAYQBtAGUAdABlAHIATgBhAG0AZQAoADcANwAsACAAJwBhADEAMgAnACkADQAKAAkAcwB…
<Chunk>xADUAIAA9ACAAUABbADQAMQBdAAkACQAtAC0AIABrADEANQANAAoACQBQAGEAcgBhAG0AcwAuAGsAMQA4ACAAPQAgAFAAWwA0ADMAXQAJAAkALQAtACAAawAxADgADQAKAAkACQANAAoACQAtAC0AIABJAG4AdAByAGEAYwBlAGwAbAB1AGwAYQByACAAbQB5AGMAbwBiAGEAYwB0AGUAcgBpAHUAbQAgAHQAdQBiAGUAcgBjAHUAbABvAHMAaQBzAA0ACgAJAA0ACgAJAFAAYQByAGEAbQBzAC4AdQBJACAAPQAgAFAAWwAxAF0ACQAtAC0AIAC1AGkADQAKAAkADQAKAAkALQAtACAAVABhAGIAbABlACAAbwBmACAAYwBvAG0AcAB…
<Chunk>_n_Liver>1</SinusoidalUptake_idEq1_n_Liver> <SinusoidalEfflux_idEq1_n_Liver>1</SinusoidalEfflux_idEq1_n_Liver> <CanalicularEfflux_idEq1_n_Liver>1</CanalicularEfflux_idEq1_n_Liver> <CES1_idEq1_n_LiverKidney>0.895</CES1_idEq1_n_LiverKidney> <CES2_idEq1_n_LiverKidney>1.193</CES2_idEq1_n_LiverKidney> <CES1_idEq1_n_Gut>0.001</CES1_idEq1_n_Gut> <CES2_idEq1_n_Gut>1.459</CES2_idEq1_n_Gut> <UserES_…
<Chunk>LCO1B1_idEq3_AgeCap_Liver>0</SLCO1B1_idEq3_AgeCap_Liver> <SLCO1B3_idEq3_AgeCap_Liver>0</SLCO1B3_idEq3_AgeCap_Liver> <SLCO2B1_idEq3_AgeCap_Liver>0</SLCO2B1_idEq3_AgeCap_Liver> <SinusoidalUptake_idEq3_AgeCap_Liver>0</SinusoidalUptake_idEq3_AgeCap_Liver> <SinusoidalEfflux_idEq3_AgeCap_Liver>0</SinusoidalEfflux_idEq3_AgeCap_Liver> <CanalicularEfflux_idEq3_AgeCap_Liver>0</CanalicularEfflux_idEq…
<Chunk>r_PMA_Cap> </PretermOntogenyItem> <PretermOntogenyItem ID="UGT_1A10_LiverKidney"> <Function>0</Function> <HasPowerFunction>false</HasPowerFunction> <UserScript>ZgB1AG4AYwB0AGkAbwBuACAAZABlAGYAaQBuAGUATwBuAHQAbwBnAGUAbgB5AF8AVQBHAFQAXwAxAEEAMQAwAF8ATABpAHYAZQByAEsAaQBkAG4AZQB5ACgAUABNAEEALAAgAFAATgBBACwAIABHAFcAKQANAAoACQAtAC0AIABQAE0AQQAgAGkAcwAgAHQAaABlACAAcABvAHMAdABtAGUAbgBzAHQAcgB1AGEA…
<Chunk>yItem> </Enzymes> <Transporters> <PretermOntogenyItem ID="ABCB1_Liver"> <Function>0</Function> <HasPowerFunction>false</HasPowerFunction> <UserScript>ZgB1AG4AYwB0AGkAbwBuACAAZABlAGYAaQBuAGUATwBuAHQAbwBnAGUAbgB5AF8AQQBCAEMAQgAxAF8ATABpAHYAZQByACgAUABNAEEALAAgAFAATgBBACwAIABHAFcAKQANAAoACQAtAC0AIABQAE0AQQAgAGkAcwAgAHQAaABlACAAcABvAHMAdABtAGUAbgBzAHQAcgB1AGEAbAAgAGEAZwBlACAAaQBuACAAeQBlAGEAcg…
<Chunk>male_Sigmoidal_n>1.83</ForearmInner_LocalSubcutaneousThickness_Female_Sigmoidal_n> <ForearmInner_LocalSubcutaneousThickness_Linear_C0>1</ForearmInner_LocalSubcutaneousThickness_Linear_C0> <ForearmInner_LocalSubcutaneousThickness_Linear_C1>0</ForearmInner_LocalSubcutaneousThickness_Linear_C1> <ForearmInner_LocalSubcutaneousThickness_Exponential_C0>1</ForearmInner_LocalSubcutaneousThickness_…
<Chunk>ess_Male_Sigmoidal_n> <LegLower_SCthickness_Female_Sigmoidal_Adultmax>1.0115</LegLower_SCthickness_Female_Sigmoidal_Adultmax> <LegLower_SCthickness_Female_Sigmoidal_Fbirth>0.6414</LegLower_SCthickness_Female_Sigmoidal_Fbirth> <LegLower_SCthickness_Female_Sigmoidal_Age50>2.7183</LegLower_SCthickness_Female_Sigmoidal_Age50> <LegLower_SCthickness_Female_Sigmoidal_n>4.176</LegLower_SCthickness…
<Chunk>butionBin20EndMale>-1</AgeDistributionBin20EndMale> <AgeDistributionBin1EndFemale>-1</AgeDistributionBin1EndFemale> <AgeDistributionBin2EndFemale>-1</AgeDistributionBin2EndFemale> <AgeDistributionBin3EndFemale>-1</AgeDistributionBin3EndFemale> <AgeDistributionBin4EndFemale>-1</AgeDistributionBin4EndFemale> <AgeDistributionBin5EndFemale>-1</AgeDistributionBin5EndFemale> <AgeDistributionBin6…
<Chunk>V>30.3</MPML_Female_OuterForearm_Num_SC_Layers_CV> <MPML_Female_UpperArm_Num_SC_Layers_CV>21.6</MPML_Female_UpperArm_Num_SC_Layers_CV> <MPML_Female_Face_Num_SC_Layers_CV>22.7</MPML_Female_Face_Num_SC_Layers_CV> <MPML_Female_LowerLeg_Num_SC_Layers_CV>9.1</MPML_Female_LowerLeg_Num_SC_Layers_CV> <MPML_Female_UpperLeg_Num_SC_Layers_CV>13</MPML_Female_UpperLeg_Num_SC_Layers_CV> <MPML_Female_Bac…
<Chunk>ace_CorneocyteWidthTop> <MPML_Female_LowerLeg_CorneocyteWidthTop>29.6</MPML_Female_LowerLeg_CorneocyteWidthTop> <MPML_Female_UpperLeg_CorneocyteWidthTop>34</MPML_Female_UpperLeg_CorneocyteWidthTop> <MPML_Female_Back_CorneocyteWidthTop>29.6</MPML_Female_Back_CorneocyteWidthTop> <MPML_Male_Forehead_CorneocyteWidthTopCV>9.2</MPML_Male_Forehead_CorneocyteWidthTopCV> <MPML_Male_InnerForearm_Cor…
<Chunk>Mid2CV> <MPML_Female_Forehead_CorneocyteThickMid2CV>36</MPML_Female_Forehead_CorneocyteThickMid2CV> <MPML_Female_InnerForearm_CorneocyteThickMid2CV>22</MPML_Female_InnerForearm_CorneocyteThickMid2CV> <MPML_Female_OuterForearm_CorneocyteThickMid2CV>22</MPML_Female_OuterForearm_CorneocyteThickMid2CV> <MPML_Female_UpperArm_CorneocyteThickMid2CV>11</MPML_Female_UpperArm_CorneocyteThickMid2CV> …
<Chunk>icknessCV>21</MPML_Female_OuterForearm_VE_ThicknessCV> <MPML_Female_UpperArm_VE_ThicknessCV>15</MPML_Female_UpperArm_VE_ThicknessCV> <MPML_Female_Face_VE_ThicknessCV>24</MPML_Female_Face_VE_ThicknessCV> <MPML_Female_LowerLeg_VE_ThicknessCV>8</MPML_Female_LowerLeg_VE_ThicknessCV> <MPML_Female_UpperLeg_VE_ThicknessCV>19</MPML_Female_UpperLeg_VE_ThicknessCV> <MPML_Female_Back_VE_ThicknessCV>1…
<Chunk>anCV2C18>0</idGutEMMeanCV2C18> <idGutEMMeanCV2C19>60</idGutEMMeanCV2C19> <idGutEMMeanCV2D6>60</idGutEMMeanCV2D6> <idGutEMMeanCV2E1>0</idGutEMMeanCV2E1> <idGutEMMeanCV2J2>60</idGutEMMeanCV2J2> <idGutEMMeanCV3A4>60</idGutEMMeanCV3A4> <idGutEMMeanCV3A5>60</idGutEMMeanCV3A5> <idV12GutEMMeanCV1A1>60</idV12GutEMMeanCV1A1> <idV12GutEMMeanCV1A4>60</idV12GutEMMeanCV1A4> <idV12GutEMMeanCV1A9>60</idV…
<Chunk> <FedBicarbonateBuffer_Ileum3>30</FedBicarbonateBuffer_Ileum3> <FedBicarbonateBuffer_Ileum4>30</FedBicarbonateBuffer_Ileum4> <FedBicarbonateBuffer_Colon>44.43</FedBicarbonateBuffer_Colon> <FedBicarbonateBufferCV_Stomach>30</FedBicarbonateBufferCV_Stomach> <FedBicarbonateBufferCV_Duodenum>30</FedBicarbonateBufferCV_Duodenum> <FedBicarbonateBufferCV_Jejunum1>30</FedBicarbonateBufferCV_Jejunu…
<Chunk>mean_TRANSPORTER_SLCO4C1>1</et_mean_TRANSPORTER_SLCO4C1> <pt_mean_TRANSPORTER_SLCO4C1>0</pt_mean_TRANSPORTER_SLCO4C1> <it_mean_TRANSPORTER_SLCO4C1>0</it_mean_TRANSPORTER_SLCO4C1> <ut_mean_TRANSPORTER_SLCO4C1>0</ut_mean_TRANSPORTER_SLCO4C1> <et_cv_TRANSPORTER_SLCO4C1>60</et_cv_TRANSPORTER_SLCO4C1> <pt_cv_TRANSPORTER_SLCO4C1>0</pt_cv_TRANSPORTER_SLCO4C1> <it_cv_TRANSPORTER_SLCO4C1>0</it_cv_T…
<Chunk>BhAGcAZQAsACAASABUACwAIABXAFQALAAgAGkAcwBNAGEAbABlACkADQAKACAALQAtACAAZABlAGYAaQBuAGUAIABhAGwAcABoAGEALQAxACAAYQBjAGkAZAAgAGcAbAB5AGMAbwBwAHIAbwB0AGUAaQBuACAAKABnAC8ATAApACAAYQBzACAAYQAgAGYAdQBuAGMAdABpAG8AbgAgAG8AZgAgAGEAZwBlACAAaQBuACAAeQBlAGEAcgBzAA0ACgAgAEEARwBQACAAPQAgADAALgA4ADgANwAgACoAIABhAGcAZQBeADAALgAzADgAIAAvACAAKAAgADgALgA4ADkAXgAwAC4AMwA4ACAAKwAgAGEAZwBlAF4AMAAuADMAOAAgACkADQ…
<Chunk>nceCV11> <Target11C0>0</Target11C0> <Target11C1>0</Target11C1> <Target11C2>0</Target11C2> <Target11C3>0</Target11C3> <idTargetKdeg11>0</idTargetKdeg11> <idTargetKdegCV11>30</idTargetKdegCV11> <idTargetMW11>150000</idTargetMW11> <idTargetKshed11>0</idTargetKshed11> <idTargetKshedCV11>30</idTargetKshedCV11> <idTargetLambda11>0</idTargetLambda11> <idTargetName12>Target 12</idTargetName12> <id…
<Chunk>22A8> <idITKidMeanCV_APICALIN>0</idITKidMeanCV_APICALIN> <idITKidMeanCV_BASALEF>0</idITKidMeanCV_BASALEF> <idITKidMeanCV_SLC47As>0</idITKidMeanCV_SLC47As> <idUTKidMean_ABCB1>0</idUTKidMean_ABCB1> <idUTKidMean_ABCC4>0</idUTKidMean_ABCC4> <idUTKidMean_ABCG2>1</idUTKidMean_ABCG2> <idUTKidMean_SLC22A2>0</idUTKidMean_SLC22A2> <idUTKidMean_SLC22A6>0</idUTKidMean_SLC22A6> <idUTKidMean_SLC22A8>0</…
<Chunk> <idTurnoverMeanCV1A7>30</idTurnoverMeanCV1A7> <idTurnoverMeanCV1A8>30</idTurnoverMeanCV1A8> <idTurnoverMeanCV1A9>30</idTurnoverMeanCV1A9> <idTurnoverMeanCV1A10>30</idTurnoverMeanCV1A10> <idTurnoverMeanCV2B4>30</idTurnoverMeanCV2B4> <idTurnoverMeanCV2B7>30</idTurnoverMeanCV2B7> <idTurnoverMeanCV2B10>30</idTurnoverMeanCV2B10> <idTurnoverMeanCV2B11>30</idTurnoverMeanCV2B11> <idTurnoverMeanCV…
<Chunk>er>0</IMCVEstUser> <CholeskyMatrix_CYP1A2_CYP1A2>1.090922</CholeskyMatrix_CYP1A2_CYP1A2> <CholeskyMatrix_CYP1A2_CYP2A6>0.3684417</CholeskyMatrix_CYP1A2_CYP2A6> <CholeskyMatrix_CYP1A2_CYP2B6>0.4891347</CholeskyMatrix_CYP1A2_CYP2B6> <CholeskyMatrix_CYP1A2_CYP2C8>0.2231979</CholeskyMatrix_CYP1A2_CYP2C8> <CholeskyMatrix_CYP1A2_CYP2C9>0.198010713</CholeskyMatrix_CYP1A2_CYP2C9> <CholeskyMatrix_C…
<Chunk>IAKAAzADcALAAgAHMAYwA6AHMAYQBtAHAAbABlAFIAYQBuAGQAbwBtAEQAaQBzAHQAcgBpAGIAdQB0AGkAbwBuACgAcwBjAC4ATABPAEcATgBPAFIATQBBAEwAXwBDAFYALAAgADEALAAgADAAKQApAAkACQAJAAkACQAtAC0AIABmADgADQAKAAkAcwBjADoAcwBlAHQAUABhAHIAYQBtAGUAdABlAHIAKAAzADgALAAgAHMAYwA6AHMAYQBtAHAAbABlAFIAYQBuAGQAbwBtAEQAaQBzAHQAcgBpAGIAdQB0AGkAbwBuACgAcwBjAC4ATABPAEcATgBPAFIATQBBAEwAXwBDAFYALAAgADUAMAAsACAAMAApACkACQAJAAkACQAtAC…
<Chunk>IAIABlAG4AZwBpAG4AZQAgAHQAbwAgAHUAcwBlAA0ACgAJAC0ALQAtAC0ALQAtAC0ALQAtAC0ALQAtAC0ALQAtAC0ALQAtAC0ALQAtAC0ALQAtAC0ALQAtAC0ALQAtAC0ALQAtAC0ALQAtAC0ALQAtAC0ALQAtAC0ALQAtAC0ALQAtAC0ALQAtAC0ALQAtAC0ALQAtAC0ALQAtAC0ALQAtAC0ALQAtAC0ALQAtAC0ALQAtAC0ALQAtAC0ALQAtAC0ALQAtAC0ALQAtAC0ALQAtAC0ALQAtAA0ACgAJAA0ACgAJAGwAbwBjAGEAbAAgAE0AYQBjAHIAbwBwAGgAYQBnAGUATgB1AG0AYgBlAHIAIAA9ACAAKABEAGkAZgBmAHMALgBNAF…
<Chunk>Eq2Eq3_Liver> <SLCO2B1_idfAddEq2Eq3_Liver>false</SLCO2B1_idfAddEq2Eq3_Liver> <SinusoidalUptake_idfAddEq2Eq3_Liver>false</SinusoidalUptake_idfAddEq2Eq3_Liver> <SinusoidalEfflux_idfAddEq2Eq3_Liver>false</SinusoidalEfflux_idfAddEq2Eq3_Liver> <CanalicularEfflux_idfAddEq2Eq3_Liver>false</CanalicularEfflux_idfAddEq2Eq3_Liver> <CES1_idfAddEq2Eq3_LiverKidney>false</CES1_idfAddEq2Eq3_LiverKidney> <…
<Chunk>ney>0</UGT1A6_idEq2_C1_LiverKidney> <UGT1A7_idEq2_C1_LiverKidney>0</UGT1A7_idEq2_C1_LiverKidney> <UGT1A8_idEq2_C1_LiverKidney>0</UGT1A8_idEq2_C1_LiverKidney> <UGT1A9_idEq2_C1_LiverKidney>0</UGT1A9_idEq2_C1_LiverKidney> <UGT1A10_idEq2_C1_LiverKidney>0</UGT1A10_idEq2_C1_LiverKidney> <UGT2B4_idEq2_C1_LiverKidney>0</UGT2B4_idEq2_C1_LiverKidney> <UGT2B7_idEq2_C1_LiverKidney>0</UGT2B7_idEq2_C1_L…
<Chunk>yItem ID="ENZ_2C8_LiverKidney"> <Function>0</Function> <HasPowerFunction>false</HasPowerFunction> <UserScript>ZgB1AG4AYwB0AGkAbwBuACAAZABlAGYAaQBuAGUATwBuAHQAbwBnAGUAbgB5AF8ARQBOAFoAXwAyAEMAOABfAEwAaQB2AGUAcgBLAGkAZABuAGUAeQAoAFAATQBBACwAIABQAE4AQQAsACAARwBXACkADQAKAAkALQAtACAAUABNAEEAIABpAHMAIAB0AGgAZQAgAHAAbwBzAHQAbQBlAG4AcwB0AHIAdQBhAGwAIABhAGcAZQAgAGkAbgAgAHkAZQBhAHIAcwAgAA0ACgAJAC0ALQ…
<Chunk>ap>1</PMA_Cap> <Power_C0>0</Power_C0> <Power_C1>0</Power_C1> <Power_Exp>0</Power_Exp> <Power_PMA_Cap>10</Power_PMA_Cap> </PretermOntogenyItem> <PretermOntogenyItem ID="ENZ_USER1_LiverKidney"> <Function>0</Function> <HasPowerFunction>false</HasPowerFunction> <UserScript>ZgB1AG4AYwB0AGkAbwBuACAAZABlAGYAaQBuAGUATwBuAHQAbwBnAGUAbgB5AF8ARQBOAFoAXwBVAFMARQBSADEAXwBMAGkAdgBlAHIASwBpAGQAbgBlAHkAKA…
<Chunk> <Power_PMA_Cap>10</Power_PMA_Cap> </PretermOntogenyItem> <PretermOntogenyItem ID="ABCB1_Gut"> <Function>0</Function> <HasPowerFunction>false</HasPowerFunction> <UserScript>ZgB1AG4AYwB0AGkAbwBuACAAZABlAGYAaQBuAGUATwBuAHQAbwBnAGUAbgB5AF8AQQBCAEMAQgAxAF8ARwB1AHQAKABQAE0AQQAsACAAUABOAEEALAAgAEcAVwApAA0ACgAJAC0ALQAgAFAATQBBACAAaQBzACAAdABoAGUAIABwAG8AcwB0AG0AZQBuAHMAdAByAHUAYQBsACAAYQBnAGUAIAB…
<Chunk>ss_Male_Sigmoidal_Fbirth>1</ForearmOuter_LocalMuscleThickness_Male_Sigmoidal_Fbirth> <ForearmOuter_LocalMuscleThickness_Male_Sigmoidal_Age50>1</ForearmOuter_LocalMuscleThickness_Male_Sigmoidal_Age50> <ForearmOuter_LocalMuscleThickness_Male_Sigmoidal_n>1</ForearmOuter_LocalMuscleThickness_Male_Sigmoidal_n> <ForearmOuter_LocalMuscleThickness_Female_Sigmoidal_Adultmax>1</ForearmOuter_LocalMus…
<Chunk>sThickness_Female_Sigmoidal_Fbirth>0.6414</LegUpper_ViableEpidermisThickness_Female_Sigmoidal_Fbirth> <LegUpper_ViableEpidermisThickness_Female_Sigmoidal_Age50>14.31</LegUpper_ViableEpidermisThickness_Female_Sigmoidal_Age50> <LegUpper_ViableEpidermisThickness_Female_Sigmoidal_n>4.176</LegUpper_ViableEpidermisThickness_Female_Sigmoidal_n> <LegUpper_ViableEpidermisThickness_Linear_C0>1</LegU…
<Chunk> <idCYP2C19_Activity_X0>1</idCYP2C19_Activity_X0> <idCYP2C19_Activity_B1>0</idCYP2C19_Activity_B1> <idCYP2C19_Activity_B2>0</idCYP2C19_Activity_B2> <idCYP2C19_Activity_B3>0</idCYP2C19_Activity_B3> <idCYP2C19_Activity_B4>0</idCYP2C19_Activity_B4> </Pregnancy> <Skin> <Tooltips /> <idMaleForearmThicknessSCMean>15.7</idMaleForearmThicknessSCMean> <idMaleForearmThicknessSCCV>33</idMaleForearmTh…
<Chunk>terForearm_InterCellLipidThicknessCV> <MPML_Male_UpperArm_InterCellLipidThicknessCV>0</MPML_Male_UpperArm_InterCellLipidThicknessCV> <MPML_Male_Face_InterCellLipidThicknessCV>0</MPML_Male_Face_InterCellLipidThicknessCV> <MPML_Male_LowerLeg_InterCellLipidThicknessCV>0</MPML_Male_LowerLeg_InterCellLipidThicknessCV> <MPML_Male_UpperLeg_InterCellLipidThicknessCV>0</MPML_Male_UpperLeg_InterCell…
<Chunk>rearm_Corneocyte_pHMid1> <MPML_Female_OuterForearm_Corneocyte_pHMid1>6.8</MPML_Female_OuterForearm_Corneocyte_pHMid1> <MPML_Female_UpperArm_Corneocyte_pHMid1>6.8</MPML_Female_UpperArm_Corneocyte_pHMid1> <MPML_Female_Face_Corneocyte_pHMid1>6.8</MPML_Female_Face_Corneocyte_pHMid1> <MPML_Female_LowerLeg_Corneocyte_pHMid1>6.8</MPML_Female_LowerLeg_Corneocyte_pHMid1> <MPML_Female_UpperLeg_Corne…
<Chunk>VisMid2>75</MPML_Female_UpperLeg_LipidVisMid2> <MPML_Female_Back_LipidVisMid2>75</MPML_Female_Back_LipidVisMid2> <MPML_Male_Forehead_LipidVisMid2CV>0</MPML_Male_Forehead_LipidVisMid2CV> <MPML_Male_InnerForearm_LipidVisMid2CV>0</MPML_Male_InnerForearm_LipidVisMid2CV> <MPML_Male_OuterForearm_LipidVisMid2CV>0</MPML_Male_OuterForearm_LipidVisMid2CV> <MPML_Male_UpperArm_LipidVisMid2CV>0</MPML_M…
<Chunk>ace_BF_ScalarCV>0</MPML_Male_Face_BF_ScalarCV> <MPML_Male_LowerLeg_BF_ScalarCV>0</MPML_Male_LowerLeg_BF_ScalarCV> <MPML_Male_UpperLeg_BF_ScalarCV>0</MPML_Male_UpperLeg_BF_ScalarCV> <MPML_Male_Back_BF_ScalarCV>0</MPML_Male_Back_BF_ScalarCV> <MPML_Female_Forehead_BF_ScalarCV>0</MPML_Female_Forehead_BF_ScalarCV> <MPML_Female_InnerForearm_BF_ScalarCV>0</MPML_Female_InnerForearm_BF_ScalarCV> <M…
<Chunk>utIMMean1A7> <idGutIMMean1A8>0</idGutIMMean1A8> <idGutIMMean1A9>0.19</idGutIMMean1A9> <idGutIMMean1A10>0</idGutIMMean1A10> <idGutIMMean2B4>0</idGutIMMean2B4> <idGutIMMean2B7>0</idGutIMMean2B7> <idGutIMMean2B10>0</idGutIMMean2B10> <idGutIMMean2B11>0</idGutIMMean2B11> <idGutIMMean2B15>0.47</idGutIMMean2B15> <idGutIMMean2B17>0.16</idGutIMMean2B17> <idGutIMMean2B28>0</idGutIMMean2B28> <idGutIM…
<Chunk>V> <idColonMeanThicknessCV>0</idColonMeanThicknessCV> <idStomachFoldExpCV>0</idStomachFoldExpCV> <idDuoFoldExpCV>0</idDuoFoldExpCV> <idJej1FoldExpCV>24.54</idJej1FoldExpCV> <idJej2FoldExpCV>20.19</idJej2FoldExpCV> <idJej3FoldExpCV>9.15</idJej3FoldExpCV> <idJej4FoldExpCV>9.15</idJej4FoldExpCV> <idJej5FoldExpCV>16.07</idJej5FoldExpCV> <idIlFoldExpCV>12.4</idIlFoldExpCV> <idColonFoldExpCV>0</…
<Chunk>_SLC22A3_COMPARTMENT_JEJUNUM1> <Compartment_SLC22A3_COMPARTMENT_JEJUNUM2>1.11</Compartment_SLC22A3_COMPARTMENT_JEJUNUM2> <Compartment_SLC22A3_COMPARTMENT_ILEUM1>1.08</Compartment_SLC22A3_COMPARTMENT_ILEUM1> <Compartment_SLC22A3_COMPARTMENT_ILEUM2>1.08</Compartment_SLC22A3_COMPARTMENT_ILEUM2> <Compartment_SLC22A3_COMPARTMENT_ILEUM3>1.23</Compartment_SLC22A3_COMPARTMENT_ILEUM3> <Compartment_…
<Chunk>IAB0AGkAcwBzAHUAZQAgAD0APQAgADYAIAB0AGgAZQBuAA0ACgAJAAkALQAtACAATABpAHYAZQByAA0ACgAJAAkAdgBvAGwAdQBtAGUAIAA9ACAAKAAwAC4AMAAzADYAIAAqACAAQgBXACkAXgAwAC4AOQAyADUAIAAvACAAMQAuADAAOAANAAoACQAJAA0ACgAJAGUAbABzAGUAaQBmACAAdABpAHMAcwB1AGUAIAA9AD0AIAA3ACAAdABoAGUAbgANAAoACQAJAC0ALQAgAEwAdQBuAGcAcwANAAoACQAJAHYAbwBsAHUAbQBlACAAPQAgACgAMAAuADAAMAA3ADcAIAAqACAAQgBXACkAXgAwAC4ANwA2ADIAIAAvACAAMQAuADAA…
<Chunk> <idIntracranialBloodVolFemale>5</idIntracranialBloodVolFemale> <idETMean_ABCB1>1</idETMean_ABCB1> <idETMean_ABCC4>1</idETMean_ABCC4> <idETMean_ABCG2>1</idETMean_ABCG2> <idETMean_INFLUXBBB>1</idETMean_INFLUXBBB> <idETMeanCV_ABCB1>0</idETMeanCV_ABCB1> <idETMeanCV_ABCC4>0</idETMeanCV_ABCC4> <idETMeanCV_ABCG2>0</idETMeanCV_ABCG2> <idETMeanCV_INFLUXBBB>0</idETMeanCV_INFLUXBBB> <idETMean_APICAL…
<Chunk>ad_Male> <idQpt_Female>120</idQpt_Female> <idQhl_Female>47</idQhl_Female> <idQdt_Female>26</idQdt_Female> <idQcd_Female>12</idQcd_Female> <idQblad_Female>1</idQblad_Female> <idBypassGlom>10</idBypassGlom> <idBypassGlomCV>30</idBypassGlomCV> <idBypassHenlesLoop>20</idBypassHenlesLoop> <idBypassHenlesLoopCV>30</idBypassHenlesLoopCV> <idKidneyWeightCV>23.4</idKidneyWeightCV> <GlomerularFiltra…
<Chunk>4> <idV12IMFreq1A9>0</idV12IMFreq1A9> <idV12IMFreq2B7>0</idV12IMFreq2B7> <idV12IMFreqUGTUser1>0</idV12IMFreqUGTUser1> <idV12IMFreqUGTUser2>0</idV12IMFreqUGTUser2> <idV12IMFreqUGTUser3>0</idV12IMFreqUGTUser3> <idV12IMFreqUGTUser4>0</idV12IMFreqUGTUser4> <idIMFreq1A1>0.44</idIMFreq1A1> <idIMFreq1A3>0</idIMFreq1A3> <idIMFreq1A4>0</idIMFreq1A4> <idIMFreq1A5>0</idIMFreq1A5> <idIMFreq1A6>0</idIM…
<Chunk>>1</idEMMean2B4> <idEMMean2B7>1</idEMMean2B7> <idEMMean2B10>1</idEMMean2B10> <idEMMean2B11>1</idEMMean2B11> <idEMMean2B15>1</idEMMean2B15> <idEMMean2B17>1</idEMMean2B17> <idEMMean2B28>1</idEMMean2B28> <idEMMeanUGTUser1>1</idEMMeanUGTUser1> <ZonalCypList> <ZonalEntity> <Number>-1</Number> <Zone2>0.166666672</Zone2> <Zone3>0.166666672</Zone3> <Zone4>0.166666672</Zone4> <Zone5>0.166666672</Zo…
<Chunk>wBhAG0AcABsAGUAUgBhAG4AZABvAG0ARABpAHMAdAByAGkAYgB1AHQAaQBvAG4AKABzAGMALgBMAE8ARwBOAE8AUgBNAEEATABfAEMAVgAsACAANQBlAC0AMwAgAC8AIAAyADQALAAgADAAKQApAAkACQAtAC0AIABhAGwAcABoAGEAMgANAAoACQBzAGMAOgBzAGUAdABQAGEAcgBhAG0AZQB0AGUAcgAoADgANAAsACAAcwBjADoAcwBhAG0AcABsAGUAUgBhAG4AZABvAG0ARABpAHMAdAByAGkAYgB1AHQAaQBvAG4AKABzAGMALgBMAE8ARwBOAE8AUgBNAEEATABfAEMAVgAsACAAMAAuADAANQAgAC8AIAAyADQALAAgADEAM…
<Chunk>QArACAAQwBvAG0ANgANAAoACQAJAAkALQAgAFAAYQByAGEAbQBzAC4AdQBUADIAIAAqACAARABpAGYAZgBzAC4AVAAyAA0ACgAJAAkACQANAAoACQAtAC0AIABDAEQAOAArACAAcAByAGUAYwB1AHIAcwBvAHIAIABjAGUAbABsAHMADQAKAA0ACgAJAGcAdQBbADcAXQAgAD0AIABQAGEAcgBhAG0AcwAuAGEAMQBBACAAKgAgACgARABpAGYAZgBzAC4ATQBBACAAKwAgAFAAYQByAGEAbQBzAC4AdwAyACAAKgAgAEQAaQBmAGYAcwAuAE0ASQApAA0ACgAJAAkACQArACAAUABhAHIAYQBtAHMALgBzAHIAMQBCACAAKgAgAEMAb…
<Chunk><CYP2E1_idEq1_FBirth_LiverKidney>0</CYP2E1_idEq1_FBirth_LiverKidney> <CYP2J2_idEq1_FBirth_LiverKidney>0</CYP2J2_idEq1_FBirth_LiverKidney> <CYP3A4_idEq1_FBirth_LiverKidney>0.11</CYP3A4_idEq1_FBirth_LiverKidney> <CYP3A5_idEq1_FBirth_LiverKidney>0.11</CYP3A5_idEq1_FBirth_LiverKidney> <CYP3A7_idEq1_FBirth_LiverKidney>33</CYP3A7_idEq1_FBirth_LiverKidney> <CYP2C9_idEq1_FBirth_Gut>0.42</CYP2C9_id…
<Chunk>iverKidney> <CYP2A6_idEq3_C0_LiverKidney>0</CYP2A6_idEq3_C0_LiverKidney> <CYP2B6_idEq3_C0_LiverKidney>0</CYP2B6_idEq3_C0_LiverKidney> <CYP2C8_idEq3_C0_LiverKidney>0</CYP2C8_idEq3_C0_LiverKidney> <CYP2C9_idEq3_C0_LiverKidney>0</CYP2C9_idEq3_C0_LiverKidney> <CYP2C18_idEq3_C0_LiverKidney>0</CYP2C18_idEq3_C0_LiverKidney> <CYP2C19_idEq3_C0_LiverKidney>0</CYP2C19_idEq3_C0_LiverKidney> <CYP2D6_id…
<Chunk> <Power_Exp>0</Power_Exp> <Power_PMA_Cap>10</Power_PMA_Cap> </PretermOntogenyItem> <PretermOntogenyItem ID="ENZ_3A7_LiverKidney"> <Function>0</Function> <HasPowerFunction>false</HasPowerFunction> <UserScript>ZgB1AG4AYwB0AGkAbwBuACAAZABlAGYAaQBuAGUATwBuAHQAbwBnAGUAbgB5AF8ARQBOAFoAXwAzAEEANwBfAEwAaQB2AGUAcgBLAGkAZABuAGUAeQAoAFAATQBBACwAIABQAE4AQQAsACAARwBXACkADQAKAAkALQAtACAAUABNAEEAIABpAHMA…
<Chunk> <FBirth>0</FBirth> <PMA_50>0</PMA_50> <Hill>1</Hill> <PMA_Cap>1</PMA_Cap> <Power_C0>0</Power_C0> <Power_C1>0</Power_C1> <Power_Exp>0</Power_Exp> <Power_PMA_Cap>10</Power_PMA_Cap> </PretermOntogenyItem> <PretermOntogenyItem ID="ENZ_2D6_Gut"> <Function>0</Function> <HasPowerFunction>false</HasPowerFunction> <UserScript>ZgB1AG4AYwB0AGkAbwBuACAAZABlAGYAaQBuAGUATwBuAHQAbwBnAGUAbgB5AF8ARQBOAFoA…
<Chunk>onential_C0> <ForeHead_TotalSkinThickness_Exponential_C1>0</ForeHead_TotalSkinThickness_Exponential_C1> <ForeHead_TotalSkinThickness_Exponential_C2>0</ForeHead_TotalSkinThickness_Exponential_C2> <ForeHead_LocalSubcutaneousThickness_EquationSwitch>0</ForeHead_LocalSubcutaneousThickness_EquationSwitch> <ForeHead_LocalSubcutaneousThickness_Male_Sigmoidal_Adultmax>1.19</ForeHead_LocalSubcutane…
<Chunk>urfacepH_Male_Sigmoidal_Adultmax> <FaceCheek_SkinSurfacepH_Male_Sigmoidal_Fbirth>1</FaceCheek_SkinSurfacepH_Male_Sigmoidal_Fbirth> <FaceCheek_SkinSurfacepH_Male_Sigmoidal_Age50>1</FaceCheek_SkinSurfacepH_Male_Sigmoidal_Age50> <FaceCheek_SkinSurfacepH_Male_Sigmoidal_n>1</FaceCheek_SkinSurfacepH_Male_Sigmoidal_n> <FaceCheek_SkinSurfacepH_Female_Sigmoidal_Adultmax>1</FaceCheek_SkinSurfacepH_F…
<Chunk>near_C1>0</Back_TotalSkinThickness_Linear_C1> <Back_TotalSkinThickness_Exponential_C0>1</Back_TotalSkinThickness_Exponential_C0> <Back_TotalSkinThickness_Exponential_C1>0</Back_TotalSkinThickness_Exponential_C1> <Back_TotalSkinThickness_Exponential_C2>0</Back_TotalSkinThickness_Exponential_C2> <Back_LocalSubcutaneousThickness_EquationSwitch>0</Back_LocalSubcutaneousThickness_EquationSwitch…
<Chunk>rearm_SkinTemp_CV>0</MPML_Male_OuterForearm_SkinTemp_CV> <MPML_Male_UpperArm_SkinTemp_CV>0</MPML_Male_UpperArm_SkinTemp_CV> <MPML_Male_Face_SkinTemp_CV>0</MPML_Male_Face_SkinTemp_CV> <MPML_Male_LowerLeg_SkinTemp_CV>0</MPML_Male_LowerLeg_SkinTemp_CV> <MPML_Male_UpperLeg_SkinTemp_CV>0</MPML_Male_UpperLeg_SkinTemp_CV> <MPML_Male_Back_SkinTemp_CV>0</MPML_Male_Back_SkinTemp_CV> <MPML_Female_For…
<Chunk><MPML_Male_OuterForearm_ShaftDiameterCV>34</MPML_Male_OuterForearm_ShaftDiameterCV> <MPML_Male_UpperArm_ShaftDiameterCV>37</MPML_Male_UpperArm_ShaftDiameterCV> <MPML_Male_Face_ShaftDiameterCV>57</MPML_Male_Face_ShaftDiameterCV> <MPML_Male_LowerLeg_ShaftDiameterCV>29</MPML_Male_LowerLeg_ShaftDiameterCV> <MPML_Male_UpperLeg_ShaftDiameterCV>41</MPML_Male_UpperLeg_ShaftDiameterCV> <MPML_Male_B…
<Chunk> <MPML_Female_OuterForearm_CorneocyteLengthMid1CV>5.7</MPML_Female_OuterForearm_CorneocyteLengthMid1CV> <MPML_Female_UpperArm_CorneocyteLengthMid1CV>6.8</MPML_Female_UpperArm_CorneocyteLengthMid1CV> <MPML_Female_Face_CorneocyteLengthMid1CV>4.1</MPML_Female_Face_CorneocyteLengthMid1CV> <MPML_Female_LowerLeg_CorneocyteLengthMid1CV>5.7</MPML_Female_LowerLeg_CorneocyteLengthMid1CV> <MPML_Femal…
<Chunk>_UpperLeg_CorneocyteWidthBottomCV> <MPML_Female_Back_CorneocyteWidthBottomCV>5.9</MPML_Female_Back_CorneocyteWidthBottomCV> <MPML_Male_Forehead_CorneocyteLengthBottom>34.2</MPML_Male_Forehead_CorneocyteLengthBottom> <MPML_Male_InnerForearm_CorneocyteLengthBottom>36.4</MPML_Male_InnerForearm_CorneocyteLengthBottom> <MPML_Male_OuterForearm_CorneocyteLengthBottom>36.4</MPML_Male_OuterForearm_…
<Chunk>cFasted_Eq1_C6> <PaedGITract_DuodenalBileConcFasted_Eq2_C0>3.31</PaedGITract_DuodenalBileConcFasted_Eq2_C0> <PaedGITract_DuodenalBileConcFasted_Eq2_C1>6.5</PaedGITract_DuodenalBileConcFasted_Eq2_C1> <PaedGITract_DuodenalBileConcFasted_Eq2_C2>10.2</PaedGITract_DuodenalBileConcFasted_Eq2_C2> <PaedGITract_DuodenalBileConcFasted_Eq2_C3>0.32</PaedGITract_DuodenalBileConcFasted_Eq2_C3> <PaedGITr…
<Chunk>asted>141</idStomachCVBileFasted> <idDuoCMCFed>1</idDuoCMCFed> <idJej1CMCFed>1</idJej1CMCFed> <idJej2CMCFed>1</idJej2CMCFed> <idIle1CMCFed>1</idIle1CMCFed> <idIle2CMCFed>1</idIle2CMCFed> <idIle3CMCFed>1</idIle3CMCFed> <idIle4CMCFed>1</idIle4CMCFed> <idColonCMCFed>1</idColonCMCFed> <idStomachCMCFed>1</idStomachCMCFed> <idDuoBileFed>8.74</idDuoBileFed> <idJej1BileFed>10.03</idJej1BileFed> <i…
<Chunk> <GutIMCVEstCES2>0</GutIMCVEstCES2> <GutIMCVEstUser>0</GutIMCVEstUser> <BoundaryLayerpHEqualsBulkLumenpH>false</BoundaryLayerpHEqualsBulkLumenpH> <ApplyACCScalar>true</ApplyACCScalar> <idPPPoreElecGradPotDropValue>-64.145</idPPPoreElecGradPotDropValue> <idPPParaScalarValue>0.00039</idPPParaScalarValue> <UseNEWEModel>false</UseNEWEModel> <EnterocyteLifespan>120</EnterocyteLifespan> <Enteroc…
<Chunk>CoAYQBnAGUAXgAyAC4ANQAvACgAMQAxAF4AMgAuADUAIAArACAAYQBnAGUAXgAyAC4ANQApACkAIAAgACAADQAKAAkACQBlAGwAcwBlAA0ACgAJAAkACQBCAEYAIAA9ACAANgAuADAAMwAgACsAIAAoADcAKgBhAGcAZQBeADIALgA1AC8AKAAxADIAXgAyAC4ANQAgACsAIABhAGcAZQBeADIALgA1ACkAKQAgACAAIAAgACAADQAKAAkACQBlAG4AZAANAAoADQAKAAkAZQBsAHMAZQBpAGYAIAAgAFQAaQBzAHMAdQBlACAAIAA9AD0AIAAgADYAOQAgAHQAaABlAG4AIAAgAA0ACgAJAAkALQAtACAAQgBvAG4AZQANAAoACQAJA…
<Chunk>eriportal1_NL> <Periportal1_NP>2.52</Periportal1_NP> <Periportal1_AP>5.09</Periportal1_AP> <Periportal1_KpALB>0.086</Periportal1_KpALB> <Periportal1_KpLPP>0.161</Periportal1_KpLPP> <Periportal1_pH_IW>7</Periportal1_pH_IW> <Periportal1_pH_EW>7.4</Periportal1_pH_EW> <Periportal2_VS>5</Periportal2_VS> <Periportal2_EW>16.5</Periportal2_EW> <Periportal2_IW>58.6</Periportal2_IW> <Periportal2_NL>…
<Chunk> <idKidneyimmean1A6>0</idKidneyimmean1A6> <idKidneyimmean1A7>0</idKidneyimmean1A7> <idKidneyimmean1A8>0</idKidneyimmean1A8> <idKidneyimmean1A9>0.19</idKidneyimmean1A9> <idKidneyimmean1A10>0</idKidneyimmean1A10> <idKidneyimmean2B4>0</idKidneyimmean2B4> <idKidneyimmean2B7>0</idKidneyimmean2B7> <idKidneyimmean2B10>0</idKidneyimmean2B10> <idKidneyimmean2B11>0</idKidneyimmean2B11> <idKidneyimme…
<Chunk>Geno5>63.8</idEMMeanCVAllele1Geno5> <idEMMeanCVAllele1Geno6>60</idEMMeanCVAllele1Geno6> <idEMMeanCVAllele2Geno1>0</idEMMeanCVAllele2Geno1> <idEMMeanCVAllele2Geno2>0</idEMMeanCVAllele2Geno2> <idEMMeanCVAllele2Geno3>0</idEMMeanCVAllele2Geno3> <idEMMeanCVAllele2Geno4>0</idEMMeanCVAllele2Geno4> <idEMMeanCVAllele2Geno5>0</idEMMeanCVAllele2Geno5> <idEMMeanCVAllele2Geno6>0</idEMMeanCVAllele2Geno6…
<Chunk> <idETMeanCV_SLC22A9>60</idETMeanCV_SLC22A9> <idITFreqSLC22A9>0</idITFreqSLC22A9> <idITMean_SLC22A9>0</idITMean_SLC22A9> <idITMeanCV_SLC22A9>0</idITMeanCV_SLC22A9> <idUTFreqSLC22A9>0</idUTFreqSLC22A9> <idUTMean_SLC22A9>0</idUTMean_SLC22A9> <idUTMeanCV_SLC22A9>0</idUTMeanCV_SLC22A9> <idPTFreqSLC47A1>0</idPTFreqSLC47A1> <idPTMean_SLC47A1>0</idPTMean_SLC47A1> <idPTMeanCV_SLC47A1>0</idPTMeanCV…
<Chunk>AGUAcwAnACkADQAKAAkAcwBjADoAcwBlAHQAVQBzAGUAcgBTAHQAYQB0AGUATgBhAG0AZQAoADMALAAgACcATQBBACAALQAgAEEAYwB0AGkAdgBhAHQAZQBkACAAbQBhAGMAcgBvAHAAaABhAGcAZQBzACcAKQANAAoADQAKAAkALQAtACAAVAAgAGMAZQBsAGwAIABwAG8AcAB1AGwAYQB0AGkAbwBuAHMADQAKAAkAcwBjADoAcwBlAHQAVQBzAGUAcgBTAHQAYQB0AGUATgBhAG0AZQAoADQALAAgACcAVAAwACAALQAgAFAAcgBlAGMAdQByAHMAbwByACAAQwBEADQAKwAgAGMAZQBsAGwAcwAnACkADQAKAAkAcwBjADoAcwBl…
<Chunk>AE4AYQBtAGUAKAA3ADEALAAgACcAUwByADQAYgAnACkADQAKAAkAcwBjADoAcwBlAHQAUABhAHIAYQBtAGUAdABlAHIATgBhAG0AZQAoADcAMgAsACAAJwBTAHIAbQAnACkADQAKAAkAcwBjADoAcwBlAHQAUABhAHIAYQBtAGUAdABlAHIATgBhAG0AZQAoADcAMwAsACAAJwBXADEAJwApAA0ACgAJAHMAYwA6AHMAZQB0AFAAYQByAGEAbQBlAHQAZQByAE4AYQBtAGUAKAA3ADQALAAgACcAVwAyACcAKQANAAoACQBzAGMAOgBzAGUAdABQAGEAcgBhAG0AZQB0AGUAcgBOAGEAbQBlACgANwA1ACwAIAAnAFcAMwAnACkADQAK…
<Chunk>AAoACQBQAGEAcgBhAG0AcwAuAGEAMQA5ACAAPQAgAFAAWwA4ADEAXQAJAAkALQAtACAAYQAxADkADQAKAAkAUABhAHIAYQBtAHMALgBhADIAMAAgAD0AIABQAFsAOAA0AF0ACQAJAC0ALQAgAGEAMgAwAA0ACgAJAFAAYQByAGEAbQBzAC4AawAxADUAIAA9ACAAUABbADQAMQBdAAkACQAtAC0AIABrADEANQANAAoACQBQAGEAcgBhAG0AcwAuAGsAMQA4ACAAPQAgAFAAWwA0ADMAXQAJAAkALQAtACAAawAxADgADQAKAAkACQANAAoACQAtAC0AIABJAG4AdAByAGEAYwBlAGwAbAB1AGwAYQByACAAbQB5AGMAbwBiAGEAYwB0…
<Chunk>Eq1_n_Liver>1</SLCO1B1_idEq1_n_Liver> <SLCO1B3_idEq1_n_Liver>1</SLCO1B3_idEq1_n_Liver> <SLCO2B1_idEq1_n_Liver>1</SLCO2B1_idEq1_n_Liver> <SinusoidalUptake_idEq1_n_Liver>1</SinusoidalUptake_idEq1_n_Liver> <SinusoidalEfflux_idEq1_n_Liver>1</SinusoidalEfflux_idEq1_n_Liver> <CanalicularEfflux_idEq1_n_Liver>1</CanalicularEfflux_idEq1_n_Liver> <CES1_idEq1_n_LiverKidney>0.895</CES1_idEq1_n_LiverKi…
<Chunk>dEq3_AgeCap_Liver>0</ABCB1_idEq3_AgeCap_Liver> <ABCC2_idEq3_AgeCap_Liver>0</ABCC2_idEq3_AgeCap_Liver> <ABCG2_idEq3_AgeCap_Liver>0</ABCG2_idEq3_AgeCap_Liver> <SLCO1B1_idEq3_AgeCap_Liver>0</SLCO1B1_idEq3_AgeCap_Liver> <SLCO1B3_idEq3_AgeCap_Liver>0</SLCO1B3_idEq3_AgeCap_Liver> <SLCO2B1_idEq3_AgeCap_Liver>0</SLCO2B1_idEq3_AgeCap_Liver> <SinusoidalUptake_idEq3_AgeCap_Liver>0</SinusoidalUptake_i…
<Chunk></Hill> <PMA_Cap>1</PMA_Cap> <Power_C0>0</Power_C0> <Power_C1>0</Power_C1> <Power_Exp>0</Power_Exp> <Power_PMA_Cap>10</Power_PMA_Cap> </PretermOntogenyItem> <PretermOntogenyItem ID="UGT_1A10_LiverKidney"> <Function>0</Function> <HasPowerFunction>false</HasPowerFunction> <UserScript>ZgB1AG4AYwB0AGkAbwBuACAAZABlAGYAaQBuAGUATwBuAHQAbwBnAGUAbgB5AF8AVQBHAFQAXwAxAEEAMQAwAF8ATABpAHYAZQByAEsAaQBkA…
<Chunk>ap> <Power_C0>0</Power_C0> <Power_C1>0</Power_C1> <Power_Exp>0</Power_Exp> <Power_PMA_Cap>10</Power_PMA_Cap> </PretermOntogenyItem> </Enzymes> <Transporters> <PretermOntogenyItem ID="ABCB1_Liver"> <Function>0</Function> <HasPowerFunction>false</HasPowerFunction> <UserScript>ZgB1AG4AYwB0AGkAbwBuACAAZABlAGYAaQBuAGUATwBuAHQAbwBnAGUAbgB5AF8AQQBCAEMAQgAxAF8ATABpAHYAZQByACgAUABNAEEALAAgAFAATgBBA…
<Chunk>orearmInner_LocalSubcutaneousThickness_Female_Sigmoidal_Age50>17.3</ForearmInner_LocalSubcutaneousThickness_Female_Sigmoidal_Age50> <ForearmInner_LocalSubcutaneousThickness_Female_Sigmoidal_n>1.83</ForearmInner_LocalSubcutaneousThickness_Female_Sigmoidal_n> <ForearmInner_LocalSubcutaneousThickness_Linear_C0>1</ForearmInner_LocalSubcutaneousThickness_Linear_C0> <ForearmInner_LocalSubcutaneo…
<Chunk>l_Fbirth> <LegLower_SCthickness_Male_Sigmoidal_Age50>2.7183</LegLower_SCthickness_Male_Sigmoidal_Age50> <LegLower_SCthickness_Male_Sigmoidal_n>4.176</LegLower_SCthickness_Male_Sigmoidal_n> <LegLower_SCthickness_Female_Sigmoidal_Adultmax>1.0115</LegLower_SCthickness_Female_Sigmoidal_Adultmax> <LegLower_SCthickness_Female_Sigmoidal_Fbirth>0.6414</LegLower_SCthickness_Female_Sigmoidal_Fbirth>…
<Chunk>istributionBin17EndMale> <AgeDistributionBin18EndMale>-1</AgeDistributionBin18EndMale> <AgeDistributionBin19EndMale>-1</AgeDistributionBin19EndMale> <AgeDistributionBin20EndMale>-1</AgeDistributionBin20EndMale> <AgeDistributionBin1EndFemale>-1</AgeDistributionBin1EndFemale> <AgeDistributionBin2EndFemale>-1</AgeDistributionBin2EndFemale> <AgeDistributionBin3EndFemale>-1</AgeDistributionBin3…
<Chunk>Female_Forehead_Num_SC_Layers_CV> <MPML_Female_InnerForearm_Num_SC_Layers_CV>30.3</MPML_Female_InnerForearm_Num_SC_Layers_CV> <MPML_Female_OuterForearm_Num_SC_Layers_CV>30.3</MPML_Female_OuterForearm_Num_SC_Layers_CV> <MPML_Female_UpperArm_Num_SC_Layers_CV>21.6</MPML_Female_UpperArm_Num_SC_Layers_CV> <MPML_Female_Face_Num_SC_Layers_CV>22.7</MPML_Female_Face_Num_SC_Layers_CV> <MPML_Female_L…
<Chunk>rm_CorneocyteWidthTop> <MPML_Female_UpperArm_CorneocyteWidthTop>33.2</MPML_Female_UpperArm_CorneocyteWidthTop> <MPML_Female_Face_CorneocyteWidthTop>27.7</MPML_Female_Face_CorneocyteWidthTop> <MPML_Female_LowerLeg_CorneocyteWidthTop>29.6</MPML_Female_LowerLeg_CorneocyteWidthTop> <MPML_Female_UpperLeg_CorneocyteWidthTop>34</MPML_Female_UpperLeg_CorneocyteWidthTop> <MPML_Female_Back_Corneocyt…
<Chunk>id2CV> <MPML_Male_UpperLeg_CorneocyteThickMid2CV>26</MPML_Male_UpperLeg_CorneocyteThickMid2CV> <MPML_Male_Back_CorneocyteThickMid2CV>30</MPML_Male_Back_CorneocyteThickMid2CV> <MPML_Female_Forehead_CorneocyteThickMid2CV>36</MPML_Female_Forehead_CorneocyteThickMid2CV> <MPML_Female_InnerForearm_CorneocyteThickMid2CV>22</MPML_Female_InnerForearm_CorneocyteThickMid2CV> <MPML_Female_OuterForearm…
<Chunk>icknessCV>7</MPML_Female_Forehead_VE_ThicknessCV> <MPML_Female_InnerForearm_VE_ThicknessCV>19</MPML_Female_InnerForearm_VE_ThicknessCV> <MPML_Female_OuterForearm_VE_ThicknessCV>21</MPML_Female_OuterForearm_VE_ThicknessCV> <MPML_Female_UpperArm_VE_ThicknessCV>15</MPML_Female_UpperArm_VE_ThicknessCV> <MPML_Female_Face_VE_ThicknessCV>24</MPML_Female_Face_VE_ThicknessCV> <MPML_Female_LowerLeg_…
<Chunk>6>0</idGutEMMeanCV2A6> <idGutEMMeanCV2B6>0</idGutEMMeanCV2B6> <idGutEMMeanCV2C8>0</idGutEMMeanCV2C8> <idGutEMMeanCV2C9>60</idGutEMMeanCV2C9> <idGutEMMeanCV2C18>0</idGutEMMeanCV2C18> <idGutEMMeanCV2C19>60</idGutEMMeanCV2C19> <idGutEMMeanCV2D6>60</idGutEMMeanCV2D6> <idGutEMMeanCV2E1>0</idGutEMMeanCV2E1> <idGutEMMeanCV2J2>60</idGutEMMeanCV2J2> <idGutEMMeanCV3A4>60</idGutEMMeanCV3A4> <idGutEMM…
<Chunk>2>17.34</FedBicarbonateBuffer_Jejunum2> <FedBicarbonateBuffer_Ileum1>30</FedBicarbonateBuffer_Ileum1> <FedBicarbonateBuffer_Ileum2>30</FedBicarbonateBuffer_Ileum2> <FedBicarbonateBuffer_Ileum3>30</FedBicarbonateBuffer_Ileum3> <FedBicarbonateBuffer_Ileum4>30</FedBicarbonateBuffer_Ileum4> <FedBicarbonateBuffer_Colon>44.43</FedBicarbonateBuffer_Colon> <FedBicarbonateBufferCV_Stomach>30</FedBi…
<Chunk>ER_SLCO2B1>0</pt_cv_TRANSPORTER_SLCO2B1> <it_cv_TRANSPORTER_SLCO2B1>0</it_cv_TRANSPORTER_SLCO2B1> <ut_cv_TRANSPORTER_SLCO2B1>0</ut_cv_TRANSPORTER_SLCO2B1> <et_mean_TRANSPORTER_SLCO4C1>1</et_mean_TRANSPORTER_SLCO4C1> <pt_mean_TRANSPORTER_SLCO4C1>0</pt_mean_TRANSPORTER_SLCO4C1> <it_mean_TRANSPORTER_SLCO4C1>0</it_mean_TRANSPORTER_SLCO4C1> <ut_mean_TRANSPORTER_SLCO4C1>0</ut_mean_TRANSPORTER_SL…
<Chunk>BuAGQAIAAgACAAIAAgAA0ACgAgACAAIAAgAHIAZQB0AHUAcgBuACAASABjAHQADQAKAA0ACgBlAG4AZAA[</Paed_HemScript> <Paed_ProteinLevelScript>ZgB1AG4AYwB0AGkAbwBuACAAZABlAGYAaQBuAGUAQQBHAFAAKABhAGcAZQAsACAASABUACwAIABXAFQALAAgAGkAcwBNAGEAbABlACkADQAKACAALQAtACAAZABlAGYAaQBuAGUAIABhAGwAcABoAGEALQAxACAAYQBjAGkAZAAgAGcAbAB5AGMAbwBwAHIAbwB0AGUAaQBuACAAKABnAC8ATAApACAAYQBzACAAYQAgAGYAdQBuAGMAdABpAG8AbgAgAG8AZgA…

## Sheet: Compliance
Simcyp version	1567983246
Operating system version	Windows 10
Excel version	Excel 2013
Date/Time	01/07/2020 10:37
User name	FUE\amohsen
Domain name	fue.edu.eg
Computer name	PH-E45-06
Simcyp Standard licence: agreement identifier
Simcyp Standard licence: agreement type	Academic research
Simcyp Standard licence: organisation	Future University in Egypt
Simcyp Standard licence: machine identifier	4C4C4544-0035-3110-8048-B7C04F4B3532
Simcyp Standard licence: source	Desktop
Simcyp Standard licence: usage	Client
Simcyp Standard licence: issued	Wed Jan 15 16:35:29 2020
Simcyp Standard licence: valid from	Tue Jan 14 22:00:00 2020
Simcyp Standard licence: valid to	Thu Jan 14 21:59:59 2021
